# Supplementary material for: Trophic state (TSISD) and mixing type significantly influence pelagic zooplankton biodiversity in temperate lakes (NW Poland)
Source: PeerJ. 2018 Oct 5;6:e5731. doi: 10.7717/peerj.5731 (PMC6174878; doi:10.7717/peerj.5731)
Supplement: Supplemental Information 1 [file peerj-06-5731-s001.xlsx]

## Sheet: Zooplankton polimictic
EstimateS (Version 9.1.0), Copyright R. K. Colwell: http://purl.oclc.org/estimates
Diversity Output from Input File: DIMI (11, sierpieÄ 2017, )
Reference Sample = 75
Samples	Individuals (computed)	S(est)	S(est) 95% CI Lower Bound	S(est) 95% CI Upper Bound	S(est) SD	S Mean (runs)	Singletons Mean	Singletons SD (runs)	Doubletons Mean	Doubletons SD (runs)	Uniques Mean	Uniques SD (runs)	Duplicates Mean	Duplicates SD (runs)	ACE Mean	ACE SD (runs)	ICE Mean	ICE SD (runs)	Chao 1 Mean	Chao 1 95% CI Lower Bound	Chao 1 95% CI Upper Bound	Chao 1 SD (analytical)	Chao 2 Mean	Chao 2 95% CI Lower Bound	Chao 2 95% CI Upper Bound	Chao 2 SD (analytical)	Jack 1 Mean	Jack 1 SD (analytical)	Jack 2 Mean	Jack 2 SD (runs)	Bootstrap Mean	Bootstrap SD (runs)	MMRuns Mean	MMMeans (1 run)	Cole Rarefaction	Cole SD (analytical)	Alpha Mean	Alpha SD (analytical)	Shannon Mean	Shannon SD (runs)	Shannon Exponential Mean	Shannon Exponential SD (runs)	Simpson Inv Mean	Simpson Inv SD (runs)
1	2139.96	20.21	14.9	25.52	2.71	20.03	4.99	3.56	1.65	1.36	20.03	4.96	0	0	28.14	10.98	20.03	4.96	27.51	21.87	53.83	6.65	20.03	31.69	31.69	0	20.03	0	0	0	20.03	4.96	0	0	44.14	2.54	3.93	0.45	1.73	0.52	6.34	2.81	4.31	2.06
2	4279.92	30.51	23.37	37.65	3.64	30.72	6.42	3.65	2.53	1.75	20.97	5.34	9.75	3.72	39.06	11.19	124.17	141.71	38.99	32.71	67.62	7.26	45.54	35.63	75.94	9.14	41.21	3.3	41.21	6.92	35.96	5.77	84.37	62.17	50.66	2.75	5	0.37	1.95	0.4	7.57	2.95	4.8	2.09
3	6419.88	37.07	29.05	45.09	4.09	37.16	7.36	3.65	2.71	1.68	19.84	4.98	11.11	3.23	45.66	9.3	68.68	20.45	46.92	39.62	78.46	8.17	49.39	41.3	73.75	7.38	50.39	3.86	55.15	8.77	43.45	5.77	100.72	63.36	55	2.9	5.67	0.36	2.05	0.37	8.26	3.05	5.12	2.22
4	8559.84	41.81	33.31	50.3	4.33	41.86	7.79	3.55	2.88	1.81	18.84	4.58	11.15	2.91	51.13	9.84	63.51	13.7	51.37	44.2	82.78	8.09	53.5	45.72	77.46	7.19	55.99	4.21	61.69	9.7	48.55	6.09	195.1	64.46	58.37	3.03	6.03	0.35	2.05	0.31	8.18	2.67	4.88	1.97
5	10699.8	45.53	36.76	54.29	4.47	45.08	8.2	3.91	3.09	2.06	17.76	5.02	10.51	3.04	55.16	11.66	62.94	12.74	56.26	47.91	91.57	9.23	57.42	49.15	83.08	7.67	59.29	4.43	65.21	11.1	51.8	6.2	75.69	65.54	61.19	3.14	6.29	0.34	2.1	0.29	8.48	2.49	5.04	1.92
6	12839.8	48.63	39.7	57.55	4.55	48.01	8.53	3.95	3.22	1.9	17.78	5.07	9.4	2.93	58.82	12.27	65.11	12.46	59.27	50.8	95.36	9.42	62.15	52.67	91.57	8.79	62.83	4.64	69.67	11.78	54.92	6.5	71.28	66.6	63.67	3.23	6.53	0.34	2.16	0.26	8.98	2.32	5.28	1.81
7	14979.7	51.32	42.29	60.34	4.6	50.62	9.09	4.11	3.5	1.84	18	5.14	8.69	2.63	62.9	13.77	67.56	12.46	62.31	53.66	97.49	9.35	66.67	55.95	99.71	9.91	66.05	4.88	73.73	12.58	57.73	6.65	70.36	67.65	65.9	3.3	6.73	0.33	2.2	0.23	9.28	2.19	5.45	1.71
8	17119.7	53.73	44.64	62.82	4.64	52.79	9.58	3.99	3.72	1.83	18.29	4.79	7.9	2.54	66.24	14.47	69.72	11.76	64.05	55.66	98.44	9.11	70.9	58.76	108.33	11.22	68.79	5.03	77.43	12.44	60.05	6.77	70.16	68.7	67.95	3.36	6.88	0.33	2.24	0.21	9.57	2.05	5.58	1.67
9	19259.6	55.93	46.79	65.07	4.66	54.8	10.08	3.75	4.03	1.97	18.77	4.43	7.32	2.4	69.08	14.24	72.2	11.1	66.19	57.72	100.48	9.14	75.16	61.51	117.14	12.6	71.48	5.14	81.1	11.84	62.26	6.71	70.28	69.73	69.85	3.4	7.05	0.33	2.26	0.19	9.79	1.91	5.67	1.6
10	21399.6	57.97	48.79	67.14	4.68	56.65	10.31	3.89	4.3	2.04	19.16	4.41	7.26	2.48	71.11	14.04	74.66	11.11	67.96	59.6	101.39	8.96	78.92	64.03	124.48	13.71	73.89	5.22	84.06	11.99	64.31	6.66	70.63	70.75	71.62	3.43	7.19	0.32	2.28	0.19	9.93	1.93	5.76	1.67
11	23539.6	59.87	50.67	69.07	4.69	58.77	10.9	3.91	4.61	2.11	20.01	4.59	7.11	2.49	74.02	13.81	77.79	11.28	70.64	61.93	104.7	9.22	84.15	67.3	134.87	15.37	76.96	5.45	88.1	12.28	66.76	6.56	71.28	71.76	73.28	3.45	7.38	0.32	2.3	0.18	10.1	1.92	5.78	1.69
12	25679.5	61.67	52.45	70.89	4.7	60.47	11.31	3.96	4.7	2.18	20.6	4.78	7.05	2.43	75.91	13.65	80.26	11.99	72.79	63.79	107.58	9.46	87.23	69.59	139.63	15.97	79.35	5.6	91.18	13.05	68.7	7.04	72.05	72.74	74.84	3.46	7.52	0.32	2.3	0.18	10.15	1.89	5.74	1.64
13	27819.5	63.37	54.14	72.61	4.71	62.02	11.64	4	5.05	2.23	21.05	4.49	7	2.46	78.07	14.53	82.45	11.61	74.53	65.43	109.11	9.47	89.84	71.55	143.75	16.49	81.45	5.69	93.83	12.4	70.45	6.92	72.81	73.71	76.32	3.47	7.63	0.32	2.3	0.17	10.16	1.86	5.71	1.63
14	29959.4	64.99	55.74	74.25	4.72	63.68	12.18	3.91	5.14	2.39	21.8	4.66	6.96	2.4	80.16	13.46	85.47	12.12	77.35	67.46	114.23	10.18	95.08	74.53	155.19	18.45	83.92	5.84	97.1	13.07	72.4	6.99	73.61	74.66	77.72	3.47	7.78	0.32	2.31	0.16	10.26	1.76	5.76	1.55
15	32099.4	66.55	57.27	75.82	4.73	65.44	12.71	3.68	5.39	2.49	22.52	4.6	7.31	2.37	82.36	12.81	88.67	12.38	79.91	69.51	117.79	10.57	96.11	76.25	153.01	17.63	86.46	5.97	100.09	13.03	74.48	7.2	74.46	75.6	79.04	3.47	7.95	0.32	2.32	0.16	10.3	1.7	5.75	1.5
16	34239.4	68.03	58.74	77.32	4.74	67	13.12	3.75	5.61	2.44	23	4.64	7.58	2.4	84.46	13.09	91.36	12.57	81.76	71.21	119.59	10.62	98.56	78.24	156.07	17.92	88.56	6.04	102.5	13.29	76.27	7.13	75.32	76.51	80.31	3.46	8.09	0.33	2.32	0.15	10.34	1.6	5.73	1.41
17	36379.3	69.46	60.16	78.76	4.75	68.42	13.25	3.92	5.98	2.43	23.34	4.83	7.91	2.38	85.83	13.45	94.01	13.31	82.55	72.48	118.54	10.12	99.7	79.69	155.66	17.52	90.39	6.05	104.44	13.8	77.88	7.3	76.18	77.4	81.51	3.45	8.2	0.32	2.33	0.15	10.41	1.59	5.76	1.4
18	38519.3	70.83	61.51	80.15	4.75	69.7	13.34	3.91	6.26	2.33	23.58	4.81	8.2	2.39	86.85	13.27	96.28	13.41	83.14	73.59	117.01	9.55	100.55	80.89	155.28	17.18	91.97	6.09	106.07	13.81	79.31	7.25	77.01	78.27	82.65	3.44	8.3	0.32	2.34	0.14	10.46	1.55	5.77	1.34
19	40659.2	72.15	62.82	81.48	4.76	70.91	13.55	3.94	6.55	2.41	24.02	4.66	8.45	2.61	88.32	13.56	99.12	13.55	84.08	74.74	117	9.31	102.68	82.47	158.71	17.62	93.67	6.2	108.02	13.45	80.72	7.11	77.81	79.12	83.75	3.42	8.4	0.32	2.34	0.14	10.51	1.53	5.76	1.33
20	42799.2	73.43	64.09	82.78	4.77	72.4	13.8	3.9	6.82	2.42	24.62	4.69	8.61	2.66	89.68	12.99	102.5	13.67	85.32	76.2	117.11	9.03	105.46	84.56	162.7	18.1	95.79	6.29	110.61	13.65	82.47	7	78.64	79.96	84.8	3.4	8.55	0.33	2.35	0.14	10.55	1.54	5.75	1.33
21	44939.2	74.66	65.31	84.02	4.77	73.47	14.15	3.79	6.95	2.56	25.07	4.53	8.72	2.68	91.03	11.95	105.3	13.48	87.34	77.58	121.06	9.62	107.71	86.11	166.61	18.66	97.35	6.41	112.53	13.1	83.74	6.58	79.41	80.77	85.81	3.38	8.64	0.33	2.35	0.14	10.63	1.57	5.79	1.34
22	47079.1	75.86	66.49	85.23	4.78	74.79	14.6	3.82	7.02	2.64	25.71	4.65	8.76	2.66	93.06	12.43	108.87	14.68	89.47	79.19	124.5	10.05	110.47	88.1	170.85	19.22	99.33	6.54	115.12	13.41	85.31	6.71	80.2	81.57	86.77	3.36	8.77	0.33	2.35	0.14	10.63	1.6	5.73	1.34
23	49219.1	77.01	67.63	86.4	4.79	75.89	14.74	3.98	7.25	2.65	25.92	4.78	9.13	2.83	94.03	12.54	111.1	15.24	90.54	80.32	125.09	9.95	111.36	89.19	170.89	18.99	100.68	6.52	116.39	13.85	86.56	6.86	80.96	82.35	87.7	3.34	8.86	0.33	2.36	0.13	10.66	1.52	5.73	1.31
24	51359	78.13	68.73	87.53	4.8	77.07	14.99	4.2	7.53	2.83	26.21	4.94	9.42	3.2	95.43	13.05	113.64	15.77	92.07	81.66	126.86	10.07	113.43	90.74	174.12	19.39	102.19	6.59	117.95	14.26	87.9	6.87	81.71	83.11	88.59	3.31	8.97	0.33	2.36	0.13	10.69	1.44	5.74	1.21
25	53499	79.22	69.81	88.63	4.8	78.46	15.17	4.28	7.83	2.71	26.71	4.96	9.84	2.97	96.63	12.68	116.76	16.19	93.28	83.03	127.21	9.86	113.95	91.99	171.97	18.64	104.1	6.65	120	14.34	89.53	6.89	82.49	83.86	89.45	3.29	9.1	0.33	2.37	0.13	10.74	1.44	5.75	1.23
26	55639	80.27	70.85	89.7	4.81	79.46	15.16	4.21	8.02	2.77	26.83	4.78	10.25	2.93	96.92	12.24	118.32	15.57	93.28	83.73	124.95	9.2	113.26	92.41	168.05	17.64	105.26	6.67	120.94	13.88	90.65	6.81	83.24	84.59	90.27	3.26	9.15	0.33	2.36	0.12	10.62	1.29	5.62	1.12
27	57778.9	81.3	71.86	90.74	4.82	80.8	15.46	4.25	8.43	2.72	27.35	4.79	10.57	2.86	98.36	11.98	121.19	15.93	94.55	85.08	125.61	9.06	114.86	93.99	169.09	17.56	107.14	6.77	123.05	14.04	92.23	6.89	84.01	85.3	91.07	3.23	9.28	0.33	2.36	0.12	10.64	1.26	5.61	1.11
28	59918.9	82.3	72.84	91.75	4.82	81.75	15.62	4.22	8.64	2.68	27.49	4.7	10.77	2.78	99.32	12.13	122.65	16.35	95.3	85.99	125.7	8.89	114.95	94.67	167.34	17	108.26	6.8	124.15	13.86	93.28	7.01	84.76	86	91.84	3.2	9.36	0.33	2.36	0.11	10.67	1.26	5.61	1.11
29	62058.8	83.26	73.8	92.73	4.83	82.5	15.71	4.35	8.83	2.72	27.7	4.79	11	2.72	100.15	12.54	124.39	16.71	96.08	86.78	126.27	8.85	115.47	95.4	167.09	16.79	109.24	6.81	125.16	14.21	94.15	7.14	85.47	86.68	92.59	3.17	9.42	0.33	2.36	0.11	10.69	1.22	5.6	1.07
30	64198.8	84.21	74.73	93.68	4.83	83.67	16.06	4.28	9	2.66	28.16	4.7	11.26	2.69	101.67	12.46	126.89	16.58	97.59	88.09	128.08	8.98	116.6	96.64	167.53	16.62	110.89	6.9	127.03	14	95.53	7.16	86.18	87.35	93.3	3.14	9.52	0.33	2.36	0.1	10.7	1.13	5.58	0.98
31	66338.8	85.12	75.64	94.61	4.84	84.58	16.36	4.16	9.07	2.6	28.49	4.57	11.37	2.7	102.7	12.02	128.97	16.5	98.92	89.16	130.03	9.19	117.86	97.73	169.09	16.74	112.15	6.98	128.52	13.43	96.59	7.01	86.87	88	94	3.11	9.6	0.33	2.37	0.1	10.78	1.14	5.64	0.99
32	68478.7	86.02	76.52	95.52	4.85	85.56	16.37	4.13	9.21	2.62	28.55	4.6	11.78	2.82	103.28	11.55	129.98	16.6	99.6	90.04	130.1	9.01	118.14	98.47	168.04	16.33	113.22	6.97	129.3	13.42	97.66	6.72	87.55	88.64	94.67	3.08	9.68	0.33	2.38	0.1	10.84	1.13	5.66	0.98
33	70618.7	86.89	77.38	96.4	4.85	86.51	16.39	4.24	9.37	2.77	28.67	4.83	12.07	2.91	103.93	11.57	131.13	17.21	100.65	91.05	131.2	9.03	119.12	99.49	168.75	16.27	114.31	7.01	130.26	14.06	98.72	6.57	88.22	89.27	95.33	3.05	9.76	0.33	2.38	0.1	10.83	1.08	5.66	0.98
34	72758.6	87.74	78.22	97.27	4.86	87.48	16.74	4.18	9.42	2.87	29	4.69	12.15	2.93	105.24	11.46	132.79	17.1	102.11	92.2	133.34	9.27	120.45	100.64	170.34	16.38	115.63	7.06	131.83	13.63	99.83	6.49	88.88	89.88	95.96	3.01	9.85	0.33	2.38	0.09	10.81	1.03	5.63	0.94
35	74898.6	88.58	79.04	98.11	4.87	88.35	16.77	4.19	9.63	2.88	29.1	4.79	12.41	3.08	105.83	11.23	133.59	16.94	102.67	92.98	133.18	9.06	121.13	101.46	170.59	16.25	116.62	7.08	132.7	13.93	100.79	6.56	89.53	90.48	96.57	2.98	9.92	0.33	2.38	0.09	10.85	1.05	5.64	0.95
36	77038.6	89.39	79.84	98.94	4.87	88.92	16.73	4.17	9.77	2.89	29.05	4.75	12.56	2.88	106.1	11.27	133.84	17.11	102.78	93.4	132.36	8.78	120.57	101.61	168.15	15.65	117.16	7.05	133.08	13.73	101.38	6.65	90.14	91.08	97.17	2.94	9.95	0.33	2.38	0.09	10.87	1.03	5.66	0.94
37	79178.5	90.18	80.62	99.74	4.88	89.98	17.05	4.01	9.83	2.92	29.41	4.65	12.54	2.92	107.34	10.89	135.46	16.68	104.23	94.61	134.36	8.97	122.83	103.18	172	16.19	118.6	7.15	134.88	13.54	102.6	6.34	90.76	91.65	97.75	2.91	10.03	0.33	2.38	0.09	10.89	1.05	5.66	0.94
38	81318.5	90.96	81.38	100.53	4.88	90.76	17.09	4.01	10.03	3.06	29.61	4.86	12.58	2.96	107.88	10.91	136.43	17.4	104.83	95.33	134.53	8.85	124.06	104.19	173.56	16.33	119.59	7.14	136.05	14.34	103.47	6.71	91.37	92.22	98.31	2.87	10.1	0.33	2.39	0.09	10.92	1.05	5.67	0.95
39	83458.4	91.72	82.13	101.3	4.89	91.59	17.2	4.04	10.1	2.99	29.79	4.81	12.61	3.08	108.65	10.75	137.16	17.32	105.84	96.24	135.78	8.93	125.43	105.26	175.61	16.57	120.62	7.2	137.23	14.22	104.39	6.5	91.97	92.78	98.86	2.84	10.18	0.33	2.39	0.09	10.95	1.01	5.67	0.89
40	85598.4	92.46	82.86	102.06	4.9	92.55	17.32	4.05	10.13	2.95	29.97	4.54	12.79	3.17	109.59	10.59	137.93	16.02	107.04	97.29	137.3	9.05	126.35	106.22	176.4	16.53	121.77	7.22	138.4	13.54	105.45	6.37	92.57	93.33	99.39	2.8	10.26	0.33	2.39	0.09	10.95	0.97	5.66	0.86
41	87738.4	93.19	83.58	102.8	4.9	93.38	17.53	4.12	10.14	2.99	30.19	4.71	12.87	3.07	110.45	10.7	138.96	17.02	108.22	98.26	138.94	9.21	127.41	107.19	177.46	16.56	122.83	7.28	139.61	13.96	106.39	6.52	93.16	93.86	99.91	2.76	10.33	0.33	2.39	0.08	10.91	0.95	5.6	0.81
42	89878.3	93.9	84.28	103.53	4.91	94.06	17.44	4.17	10.3	2.99	30.22	4.73	12.93	2.96	110.8	10.56	139.4	17.05	108.57	98.84	138.54	8.99	127.92	107.83	177.53	16.43	123.56	7.28	140.33	14	107.11	6.42	93.74	94.39	100.41	2.72	10.38	0.33	2.39	0.08	10.95	0.89	5.62	0.78
43	92018.3	94.6	84.96	104.24	4.92	94.78	17.54	4.2	10.37	2.91	30.47	4.8	12.9	2.85	111.53	10.59	140.54	17.37	109.32	99.59	139.2	8.97	129.3	108.87	179.56	16.68	124.54	7.28	141.59	14.29	107.93	6.43	94.3	94.91	100.9	2.69	10.45	0.33	2.39	0.08	10.98	0.86	5.62	0.76
44	94158.2	95.29	85.63	104.94	4.93	95.26	17.39	4.06	10.51	3.01	30.29	4.76	12.94	2.76	111.44	10.19	139.52	16.97	109.31	99.88	138.49	8.74	129.09	109.06	178.44	16.37	124.86	7.25	141.71	14.29	108.37	6.49	94.84	95.42	101.38	2.65	10.48	0.33	2.4	0.07	11.01	0.84	5.63	0.75
45	96298.2	95.96	86.29	105.63	4.93	95.79	17.36	4	10.49	2.94	30.18	4.74	13.16	2.8	111.69	10.06	139.12	16.56	109.8	100.39	138.99	8.73	128.98	109.32	177.41	16.06	125.3	7.24	141.85	14.35	108.9	6.44	95.36	95.92	101.85	2.61	10.51	0.33	2.39	0.07	10.99	0.81	5.6	0.72
46	98438.2	96.62	86.94	106.31	4.94	96.6	17.57	3.81	10.5	2.96	30.45	4.71	13.24	2.91	112.56	9.66	139.71	16.36	110.78	101.26	140.15	8.8	130.29	110.37	179.2	16.24	126.39	7.3	143.13	14.29	109.83	6.39	95.88	96.41	102.3	2.57	10.59	0.33	2.4	0.07	11.01	0.79	5.61	0.71
47	100578	97.27	87.57	106.97	4.95	97.02	17.54	3.82	10.54	2.84	30.34	4.85	13.35	2.92	112.82	9.71	139.12	16.81	111.02	101.62	140.06	8.7	130.41	110.67	178.91	16.1	126.71	7.28	143.26	14.66	110.23	6.48	96.38	96.9	102.74	2.52	10.61	0.33	2.39	0.07	10.98	0.75	5.59	0.69
48	102718	97.91	88.19	107.63	4.96	97.67	17.61	3.67	10.53	2.76	30.48	4.77	13.25	2.92	113.45	9.44	138.8	16.54	111.68	102.27	140.75	8.71	131.43	111.48	180.44	16.27	127.52	7.3	144.3	14.35	110.93	6.47	96.87	97.37	103.18	2.48	10.67	0.33	2.4	0.06	10.99	0.71	5.59	0.65
49	104858	98.53	88.8	108.27	4.97	98.21	17.57	3.6	10.44	2.68	30.56	4.64	13.15	2.83	113.76	9.11	138.65	15.87	112.2	102.79	141.29	8.71	132.01	112.05	180.97	16.27	128.15	7.3	145.11	14.02	111.5	6.43	97.34	97.84	103.6	2.44	10.7	0.33	2.4	0.06	11	0.68	5.58	0.63
50	106998	99.15	89.4	108.9	4.98	98.84	17.62	3.48	10.51	2.7	30.64	4.53	13.12	2.73	114.36	8.82	138.58	15.42	112.8	103.41	141.82	8.69	132.7	112.71	181.69	16.28	128.87	7.32	145.94	13.52	112.18	6.24	97.81	98.3	104.01	2.39	10.74	0.33	2.4	0.06	11	0.66	5.57	0.61
51	109138	99.76	89.98	109.53	4.99	99.49	17.8	3.37	10.44	2.66	30.73	4.21	13.13	2.68	115.09	8.45	138.44	14.16	113.81	104.2	143.37	8.88	133.32	113.35	182.24	16.26	129.62	7.38	146.78	12.64	112.87	5.9	98.27	98.76	104.42	2.35	10.8	0.33	2.4	0.06	11.02	0.63	5.58	0.6
52	111278	100.35	90.56	110.15	5	100.03	17.89	3.44	10.33	2.66	30.8	4.37	13.02	2.77	115.62	8.43	138.13	14.14	114.72	104.87	144.93	9.08	134.61	114.2	184.61	16.62	130.24	7.4	147.58	13.14	113.44	5.95	98.73	99.21	104.81	2.3	10.83	0.33	2.4	0.05	11	0.61	5.55	0.53
53	113418	100.94	91.13	110.75	5.01	100.53	17.9	3.31	10.39	2.61	30.84	4.15	13.04	2.76	116.07	8.17	137.82	13.06	115.03	105.3	144.89	8.97	135.03	114.66	184.93	16.59	130.79	7.43	148.16	12.57	113.96	5.75	99.17	99.65	105.2	2.25	10.86	0.33	2.4	0.05	11	0.58	5.54	0.51
54	115558	101.52	91.68	111.35	5.02	101.03	17.89	3.32	10.47	2.54	30.79	4.2	13.14	2.77	116.37	8.21	137.48	12.89	115.4	105.76	144.96	8.89	135.31	115.07	184.87	16.48	131.25	7.44	148.48	12.78	114.46	5.73	99.6	100.08	105.57	2.21	10.89	0.33	2.4	0.05	11	0.58	5.53	0.49
55	117698	102.09	92.23	111.94	5.03	101.51	17.82	3.35	10.49	2.54	30.8	4.24	13.1	2.72	116.62	8.07	137.12	12.72	115.73	106.19	145.06	8.81	135.91	115.6	185.68	16.54	131.75	7.43	149.04	12.74	114.95	5.66	100.02	100.51	105.94	2.16	10.93	0.33	2.4	0.05	11.03	0.58	5.54	0.5
56	119838	102.65	92.77	112.53	5.04	102.05	17.88	3.29	10.43	2.47	30.87	4.21	13.1	2.66	117.23	7.96	137.15	12.32	116.38	106.77	145.82	8.85	136.56	116.2	186.37	16.57	132.37	7.46	149.73	12.59	115.52	5.55	100.44	100.93	106.3	2.1	10.97	0.33	2.4	0.05	11.03	0.55	5.54	0.47
57	121978	103.2	93.3	113.1	5.05	102.69	17.97	3.21	10.52	2.54	31.05	4.15	13.12	2.61	117.91	7.89	137.42	12.15	117.12	107.45	146.77	8.92	137.27	116.9	187.01	16.56	133.2	7.47	150.72	12.44	116.23	5.56	100.85	101.35	106.66	2.05	11.02	0.33	2.4	0.05	11.05	0.54	5.54	0.46
58	124118	103.74	93.82	113.67	5.06	103.19	17.9	2.91	10.54	2.37	31.1	3.79	13.14	2.44	118.14	7.24	137.31	10.96	117.24	107.8	146.28	8.72	137.32	117.22	186.33	16.33	133.75	7.51	151.32	11.16	116.76	5.13	101.26	101.76	107	2	11.06	0.33	2.4	0.05	11.07	0.55	5.55	0.47
59	126258	104.28	94.33	114.23	5.08	103.77	17.88	2.89	10.65	2.3	31.08	3.79	13.24	2.34	118.64	7.2	137.1	10.71	117.58	108.3	146.1	8.57	137.56	117.68	186	16.14	134.32	7.52	151.78	11.33	117.35	5.2	101.66	102.16	107.34	1.94	11.1	0.33	2.4	0.05	11.06	0.52	5.53	0.45
60	128398	104.81	94.83	114.79	5.09	104.27	17.86	3	10.61	2.18	31.2	3.85	13.13	2.26	119.06	7.41	137.34	10.88	118.14	108.83	146.77	8.6	138.66	118.43	187.89	16.41	134.95	7.53	152.63	11.38	117.89	5.19	102.05	102.56	107.68	1.88	11.14	0.33	2.4	0.05	11.06	0.51	5.52	0.43
61	130538	105.34	95.33	115.34	5.1	104.89	18	2.88	10.72	2.27	31.45	3.73	13.15	2.15	119.77	7.11	137.75	10.62	118.88	109.49	147.7	8.66	139.57	119.21	188.98	16.5	135.82	7.57	153.74	10.9	118.6	5.02	102.45	102.96	108	1.82	11.19	0.33	2.4	0.04	11.07	0.47	5.53	0.39
62	132678	105.89	95.86	115.93	5.12	105.42	18.13	2.57	10.66	2.21	31.62	3.4	13.06	2.22	120.35	6.45	137.95	9.59	119.56	110.07	148.65	8.75	140.71	120	190.98	16.79	136.53	7.63	154.7	9.93	119.19	4.54	102.83	103.35	108.32	1.76	11.23	0.33	2.4	0.04	11.07	0.45	5.51	0.37
63	134817	106.36	96.3	116.42	5.13	106.08	18.2	2.5	10.72	2.07	31.83	3.29	13.12	2.01	121.02	6.16	138.29	8.92	120.15	110.72	148.95	8.68	141.49	120.75	191.64	16.77	137.4	7.67	155.73	9.65	119.94	4.32	103.22	103.73	108.64	1.69	11.29	0.33	2.41	0.04	11.09	0.42	5.53	0.35
64	136957	106.86	96.77	116.95	5.15	106.51	18.19	2.56	10.69	2	31.85	3.24	13.18	1.98	121.29	6.21	138.52	8.8	120.61	111.16	149.43	8.69	141.81	121.14	191.77	16.71	137.86	7.68	156.15	9.62	120.39	4.28	103.61	104.11	108.95	1.63	11.32	0.33	2.41	0.04	11.1	0.4	5.53	0.32
65	139097	107.36	97.24	117.48	5.16	107.03	18.32	2.43	10.73	2.08	31.99	3.15	13.24	1.92	121.89	6.01	139.03	8.57	121.36	111.77	150.55	8.81	142.39	121.71	192.26	16.7	138.53	7.72	156.9	9.38	120.96	4.21	103.98	104.49	109.25	1.55	11.37	0.33	2.41	0.03	11.12	0.38	5.55	0.31
66	141237	107.85	97.7	118	5.18	107.58	18.39	2.22	10.78	1.99	32.05	2.84	13.32	1.95	122.41	5.37	139.28	7.65	121.91	112.32	151.06	8.8	142.95	122.27	192.81	16.7	139.14	7.75	157.51	8.66	121.55	3.72	104.36	104.86	109.54	1.48	11.41	0.33	2.41	0.03	11.13	0.36	5.55	0.29
67	143377	108.33	98.15	118.52	5.2	108.23	18.56	2.17	10.79	1.85	32.27	2.85	13.36	1.79	123.24	5.31	140.01	7.58	122.69	113.03	151.93	8.84	143.89	123.09	193.91	16.77	140.02	7.8	158.56	8.67	122.28	3.69	104.74	105.22	109.84	1.39	11.47	0.33	2.41	0.03	11.14	0.33	5.56	0.26
68	145517	108.81	98.59	119.03	5.21	108.84	18.78	1.77	10.75	1.79	32.45	2.5	13.49	1.67	124.01	4.52	140.6	6.84	123.58	113.74	153.2	8.98	144.37	123.67	194.04	16.67	140.81	7.87	159.41	7.58	122.97	3.26	105.11	105.58	110.12	1.31	11.52	0.33	2.41	0.03	11.15	0.31	5.56	0.25
69	147657	109.28	99.03	119.53	5.23	109.3	18.8	1.71	10.84	1.68	32.54	2.38	13.51	1.48	124.45	4.18	141.14	6.35	123.92	114.17	153.28	8.9	144.87	124.16	194.48	16.66	141.37	7.91	160.04	7.15	123.47	2.96	105.48	105.94	110.4	1.21	11.55	0.33	2.41	0.03	11.16	0.29	5.55	0.23
70	149797	109.75	99.46	120.04	5.25	109.92	18.89	1.46	10.95	1.47	32.79	2.07	13.61	1.36	125.11	3.58	142	5.75	124.41	114.75	153.45	8.81	145.63	124.88	195.2	16.67	142.24	7.95	161.07	6.13	124.19	2.57	105.85	106.3	110.68	1.11	11.61	0.33	2.41	0.02	11.17	0.27	5.56	0.21
71	151937	110.21	99.89	120.53	5.27	110.36	18.91	1.31	10.97	1.31	32.86	1.82	13.71	1.16	125.52	3.17	142.51	5.06	124.76	115.16	153.6	8.75	145.83	125.23	194.95	16.53	142.76	7.95	161.56	5.26	124.66	2.24	106.22	106.64	110.95	1	11.64	0.34	2.41	0.02	11.18	0.23	5.56	0.19
72	154077	110.66	100.3	121.03	5.29	110.8	18.95	1.2	10.93	1.21	32.94	1.65	13.8	1.06	125.98	2.93	143.08	4.57	125.29	115.63	154.26	8.8	146.17	125.65	195.06	16.46	143.28	7.95	162.08	4.81	125.14	2.04	106.58	106.99	111.22	0.86	11.67	0.33	2.42	0.02	11.19	0.21	5.57	0.17
73	156217	111.11	100.72	121.51	5.31	111.16	18.96	1.04	10.96	0.93	32.98	1.39	13.79	0.9	126.31	2.49	143.47	3.75	125.54	115.96	154.3	8.73	146.57	126.03	195.48	16.47	143.69	7.96	162.54	4.04	125.52	1.7	106.93	107.33	111.49	0.71	11.7	0.34	2.42	0.01	11.21	0.17	5.58	0.14
74	158357	111.56	101.12	122	5.33	111.44	18.89	0.92	10.95	0.7	32.9	1.11	13.8	0.67	126.42	2.19	143.56	3	125.66	116.17	154.17	8.65	146.55	126.17	195.12	16.35	143.9	7.95	162.66	3.29	125.77	1.48	107.28	107.67	111.74	0.5	11.72	0.33	2.42	0.01	11.23	0.11	5.59	0.09
75	160497	112	101.52	122.48	5.35	112	19	0	11	0	33	0	14	0	127.03	0	144.17	0.02	126.25	116.75	154.74	8.66	146.73	126.6	194.64	16.14	144.56	7.98	163.24	0	126.39	0	107.62	108	0	0	11.76	0.34	2.42	0	11.23	0	5.58	0
76	162637	112.44	101.92	122.95	5.37	0	0	0	0	0	0	0	0	0	0	0	0	0	0	0	0	0	0	0	0	0	0	0	0	0	0	0	0	0	0	0	0	0	0	0	0	0	0	0
77	164777	112.87	102.3	123.43	5.39	0	0	0	0	0	0	0	0	0	0	0	0	0	0	0	0	0	0	0	0	0	0	0	0	0	0	0	0	0	0	0	0	0	0	0	0	0	0	0
78	166917	113.29	102.68	123.9	5.41	0	0	0	0	0	0	0	0	0	0	0	0	0	0	0	0	0	0	0	0	0	0	0	0	0	0	0	0	0	0	0	0	0	0	0	0	0	0	0
79	169057	113.71	103.06	124.36	5.43	0	0	0	0	0	0	0	0	0	0	0	0	0	0	0	0	0	0	0	0	0	0	0	0	0	0	0	0	0	0	0	0	0	0	0	0	0	0	0
80	171197	114.13	103.43	124.82	5.46	0	0	0	0	0	0	0	0	0	0	0	0	0	0	0	0	0	0	0	0	0	0	0	0	0	0	0	0	0	0	0	0	0	0	0	0	0	0	0
81	173337	114.54	103.79	125.28	5.48	0	0	0	0	0	0	0	0	0	0	0	0	0	0	0	0	0	0	0	0	0	0	0	0	0	0	0	0	0	0	0	0	0	0	0	0	0	0	0
82	175477	114.94	104.15	125.74	5.51	0	0	0	0	0	0	0	0	0	0	0	0	0	0	0	0	0	0	0	0	0	0	0	0	0	0	0	0	0	0	0	0	0	0	0	0	0	0	0
83	177617	115.35	104.5	126.19	5.53	0	0	0	0	0	0	0	0	0	0	0	0	0	0	0	0	0	0	0	0	0	0	0	0	0	0	0	0	0	0	0	0	0	0	0	0	0	0	0
84	179757	115.74	104.85	126.63	5.56	0	0	0	0	0	0	0	0	0	0	0	0	0	0	0	0	0	0	0	0	0	0	0	0	0	0	0	0	0	0	0	0	0	0	0	0	0	0	0
85	181897	116.13	105.19	127.08	5.58	0	0	0	0	0	0	0	0	0	0	0	0	0	0	0	0	0	0	0	0	0	0	0	0	0	0	0	0	0	0	0	0	0	0	0	0	0	0	0
86	184037	116.52	105.53	127.52	5.61	0	0	0	0	0	0	0	0	0	0	0	0	0	0	0	0	0	0	0	0	0	0	0	0	0	0	0	0	0	0	0	0	0	0	0	0	0	0	0
87	186177	116.91	105.86	127.96	5.64	0	0	0	0	0	0	0	0	0	0	0	0	0	0	0	0	0	0	0	0	0	0	0	0	0	0	0	0	0	0	0	0	0	0	0	0	0	0	0
88	188316	117.29	106.18	128.39	5.66	0	0	0	0	0	0	0	0	0	0	0	0	0	0	0	0	0	0	0	0	0	0	0	0	0	0	0	0	0	0	0	0	0	0	0	0	0	0	0
89	190456	117.66	106.5	128.82	5.69	0	0	0	0	0	0	0	0	0	0	0	0	0	0	0	0	0	0	0	0	0	0	0	0	0	0	0	0	0	0	0	0	0	0	0	0	0	0	0
90	192596	118.03	106.82	129.25	5.72	0	0	0	0	0	0	0	0	0	0	0	0	0	0	0	0	0	0	0	0	0	0	0	0	0	0	0	0	0	0	0	0	0	0	0	0	0	0	0
91	194736	118.4	107.12	129.67	5.75	0	0	0	0	0	0	0	0	0	0	0	0	0	0	0	0	0	0	0	0	0	0	0	0	0	0	0	0	0	0	0	0	0	0	0	0	0	0	0
92	196876	118.76	107.43	130.09	5.78	0	0	0	0	0	0	0	0	0	0	0	0	0	0	0	0	0	0	0	0	0	0	0	0	0	0	0	0	0	0	0	0	0	0	0	0	0	0	0
93	199016	119.12	107.73	130.51	5.81	0	0	0	0	0	0	0	0	0	0	0	0	0	0	0	0	0	0	0	0	0	0	0	0	0	0	0	0	0	0	0	0	0	0	0	0	0	0	0
94	201156	119.47	108.02	130.93	5.84	0	0	0	0	0	0	0	0	0	0	0	0	0	0	0	0	0	0	0	0	0	0	0	0	0	0	0	0	0	0	0	0	0	0	0	0	0	0	0
95	203296	119.82	108.31	131.34	5.88	0	0	0	0	0	0	0	0	0	0	0	0	0	0	0	0	0	0	0	0	0	0	0	0	0	0	0	0	0	0	0	0	0	0	0	0	0	0	0
96	205436	120.17	108.59	131.75	5.91	0	0	0	0	0	0	0	0	0	0	0	0	0	0	0	0	0	0	0	0	0	0	0	0	0	0	0	0	0	0	0	0	0	0	0	0	0	0	0
97	207576	120.51	108.87	132.16	5.94	0	0	0	0	0	0	0	0	0	0	0	0	0	0	0	0	0	0	0	0	0	0	0	0	0	0	0	0	0	0	0	0	0	0	0	0	0	0	0
98	209716	120.85	109.14	132.56	5.98	0	0	0	0	0	0	0	0	0	0	0	0	0	0	0	0	0	0	0	0	0	0	0	0	0	0	0	0	0	0	0	0	0	0	0	0	0	0	0
99	211856	121.19	109.41	132.97	6.01	0	0	0	0	0	0	0	0	0	0	0	0	0	0	0	0	0	0	0	0	0	0	0	0	0	0	0	0	0	0	0	0	0	0	0	0	0	0	0
100	213996	121.52	109.67	133.36	6.04	0	0	0	0	0	0	0	0	0	0	0	0	0	0	0	0	0	0	0	0	0	0	0	0	0	0	0	0	0	0	0	0	0	0	0	0	0	0	0
101	216136	121.84	109.93	133.76	6.08	0	0	0	0	0	0	0	0	0	0	0	0	0	0	0	0	0	0	0	0	0	0	0	0	0	0	0	0	0	0	0	0	0	0	0	0	0	0	0
102	218276	122.17	110.18	134.15	6.12	0	0	0	0	0	0	0	0	0	0	0	0	0	0	0	0	0	0	0	0	0	0	0	0	0	0	0	0	0	0	0	0	0	0	0	0	0	0	0
103	220416	122.49	110.43	134.55	6.15	0	0	0	0	0	0	0	0	0	0	0	0	0	0	0	0	0	0	0	0	0	0	0	0	0	0	0	0	0	0	0	0	0	0	0	0	0	0	0
104	222556	122.8	110.67	134.93	6.19	0	0	0	0	0	0	0	0	0	0	0	0	0	0	0	0	0	0	0	0	0	0	0	0	0	0	0	0	0	0	0	0	0	0	0	0	0	0	0
105	224696	123.12	110.91	135.32	6.23	0	0	0	0	0	0	0	0	0	0	0	0	0	0	0	0	0	0	0	0	0	0	0	0	0	0	0	0	0	0	0	0	0	0	0	0	0	0	0
106	226836	123.42	111.15	135.7	6.26	0	0	0	0	0	0	0	0	0	0	0	0	0	0	0	0	0	0	0	0	0	0	0	0	0	0	0	0	0	0	0	0	0	0	0	0	0	0	0
107	228976	123.73	111.38	136.08	6.3	0	0	0	0	0	0	0	0	0	0	0	0	0	0	0	0	0	0	0	0	0	0	0	0	0	0	0	0	0	0	0	0	0	0	0	0	0	0	0
108	231116	124.03	111.6	136.46	6.34	0	0	0	0	0	0	0	0	0	0	0	0	0	0	0	0	0	0	0	0	0	0	0	0	0	0	0	0	0	0	0	0	0	0	0	0	0	0	0
109	233256	124.33	111.82	136.84	6.38	0	0	0	0	0	0	0	0	0	0	0	0	0	0	0	0	0	0	0	0	0	0	0	0	0	0	0	0	0	0	0	0	0	0	0	0	0	0	0
110	235396	124.63	112.04	137.21	6.42	0	0	0	0	0	0	0	0	0	0	0	0	0	0	0	0	0	0	0	0	0	0	0	0	0	0	0	0	0	0	0	0	0	0	0	0	0	0	0
111	237536	124.92	112.25	137.58	6.46	0	0	0	0	0	0	0	0	0	0	0	0	0	0	0	0	0	0	0	0	0	0	0	0	0	0	0	0	0	0	0	0	0	0	0	0	0	0	0
112	239676	125.21	112.46	137.95	6.5	0	0	0	0	0	0	0	0	0	0	0	0	0	0	0	0	0	0	0	0	0	0	0	0	0	0	0	0	0	0	0	0	0	0	0	0	0	0	0
113	241815	125.49	112.67	138.32	6.54	0	0	0	0	0	0	0	0	0	0	0	0	0	0	0	0	0	0	0	0	0	0	0	0	0	0	0	0	0	0	0	0	0	0	0	0	0	0	0
114	243955	125.77	112.87	138.68	6.59	0	0	0	0	0	0	0	0	0	0	0	0	0	0	0	0	0	0	0	0	0	0	0	0	0	0	0	0	0	0	0	0	0	0	0	0	0	0	0
115	246095	126.05	113.06	139.04	6.63	0	0	0	0	0	0	0	0	0	0	0	0	0	0	0	0	0	0	0	0	0	0	0	0	0	0	0	0	0	0	0	0	0	0	0	0	0	0	0
116	248235	126.33	113.25	139.4	6.67	0	0	0	0	0	0	0	0	0	0	0	0	0	0	0	0	0	0	0	0	0	0	0	0	0	0	0	0	0	0	0	0	0	0	0	0	0	0	0
117	250375	126.6	113.44	139.76	6.71	0	0	0	0	0	0	0	0	0	0	0	0	0	0	0	0	0	0	0	0	0	0	0	0	0	0	0	0	0	0	0	0	0	0	0	0	0	0	0
118	252515	126.87	113.63	140.11	6.76	0	0	0	0	0	0	0	0	0	0	0	0	0	0	0	0	0	0	0	0	0	0	0	0	0	0	0	0	0	0	0	0	0	0	0	0	0	0	0
119	254655	127.14	113.81	140.47	6.8	0	0	0	0	0	0	0	0	0	0	0	0	0	0	0	0	0	0	0	0	0	0	0	0	0	0	0	0	0	0	0	0	0	0	0	0	0	0	0
120	256795	127.4	113.98	140.82	6.85	0	0	0	0	0	0	0	0	0	0	0	0	0	0	0	0	0	0	0	0	0	0	0	0	0	0	0	0	0	0	0	0	0	0	0	0	0	0	0
121	258935	127.66	114.16	141.16	6.89	0	0	0	0	0	0	0	0	0	0	0	0	0	0	0	0	0	0	0	0	0	0	0	0	0	0	0	0	0	0	0	0	0	0	0	0	0	0	0
122	261075	127.92	114.33	141.51	6.93	0	0	0	0	0	0	0	0	0	0	0	0	0	0	0	0	0	0	0	0	0	0	0	0	0	0	0	0	0	0	0	0	0	0	0	0	0	0	0
123	263215	128.17	114.49	141.85	6.98	0	0	0	0	0	0	0	0	0	0	0	0	0	0	0	0	0	0	0	0	0	0	0	0	0	0	0	0	0	0	0	0	0	0	0	0	0	0	0
124	265355	128.42	114.65	142.2	7.03	0	0	0	0	0	0	0	0	0	0	0	0	0	0	0	0	0	0	0	0	0	0	0	0	0	0	0	0	0	0	0	0	0	0	0	0	0	0	0
125	267495	128.67	114.81	142.53	7.07	0	0	0	0	0	0	0	0	0	0	0	0	0	0	0	0	0	0	0	0	0	0	0	0	0	0	0	0	0	0	0	0	0	0	0	0	0	0	0
126	269635	128.92	114.97	142.87	7.12	0	0	0	0	0	0	0	0	0	0	0	0	0	0	0	0	0	0	0	0	0	0	0	0	0	0	0	0	0	0	0	0	0	0	0	0	0	0	0
127	271775	129.16	115.12	143.21	7.17	0	0	0	0	0	0	0	0	0	0	0	0	0	0	0	0	0	0	0	0	0	0	0	0	0	0	0	0	0	0	0	0	0	0	0	0	0	0	0
128	273915	129.4	115.27	143.54	7.21	0	0	0	0	0	0	0	0	0	0	0	0	0	0	0	0	0	0	0	0	0	0	0	0	0	0	0	0	0	0	0	0	0	0	0	0	0	0	0
129	276055	129.64	115.41	143.87	7.26	0	0	0	0	0	0	0	0	0	0	0	0	0	0	0	0	0	0	0	0	0	0	0	0	0	0	0	0	0	0	0	0	0	0	0	0	0	0	0
130	278195	129.88	115.55	144.2	7.31	0	0	0	0	0	0	0	0	0	0	0	0	0	0	0	0	0	0	0	0	0	0	0	0	0	0	0	0	0	0	0	0	0	0	0	0	0	0	0
131	280335	130.11	115.69	144.52	7.36	0	0	0	0	0	0	0	0	0	0	0	0	0	0	0	0	0	0	0	0	0	0	0	0	0	0	0	0	0	0	0	0	0	0	0	0	0	0	0
132	282475	130.34	115.83	144.85	7.4	0	0	0	0	0	0	0	0	0	0	0	0	0	0	0	0	0	0	0	0	0	0	0	0	0	0	0	0	0	0	0	0	0	0	0	0	0	0	0
133	284615	130.57	115.96	145.17	7.45	0	0	0	0	0	0	0	0	0	0	0	0	0	0	0	0	0	0	0	0	0	0	0	0	0	0	0	0	0	0	0	0	0	0	0	0	0	0	0
134	286755	130.79	116.09	145.49	7.5	0	0	0	0	0	0	0	0	0	0	0	0	0	0	0	0	0	0	0	0	0	0	0	0	0	0	0	0	0	0	0	0	0	0	0	0	0	0	0
135	288895	131.01	116.21	145.81	7.55	0	0	0	0	0	0	0	0	0	0	0	0	0	0	0	0	0	0	0	0	0	0	0	0	0	0	0	0	0	0	0	0	0	0	0	0	0	0	0
136	291035	131.23	116.34	146.12	7.6	0	0	0	0	0	0	0	0	0	0	0	0	0	0	0	0	0	0	0	0	0	0	0	0	0	0	0	0	0	0	0	0	0	0	0	0	0	0	0
137	293175	131.45	116.46	146.44	7.65	0	0	0	0	0	0	0	0	0	0	0	0	0	0	0	0	0	0	0	0	0	0	0	0	0	0	0	0	0	0	0	0	0	0	0	0	0	0	0
138	295314	131.66	116.58	146.75	7.7	0	0	0	0	0	0	0	0	0	0	0	0	0	0	0	0	0	0	0	0	0	0	0	0	0	0	0	0	0	0	0	0	0	0	0	0	0	0	0
139	297454	131.87	116.69	147.06	7.75	0	0	0	0	0	0	0	0	0	0	0	0	0	0	0	0	0	0	0	0	0	0	0	0	0	0	0	0	0	0	0	0	0	0	0	0	0	0	0
140	299594	132.08	116.8	147.37	7.8	0	0	0	0	0	0	0	0	0	0	0	0	0	0	0	0	0	0	0	0	0	0	0	0	0	0	0	0	0	0	0	0	0	0	0	0	0	0	0
141	301734	132.29	116.91	147.67	7.85	0	0	0	0	0	0	0	0	0	0	0	0	0	0	0	0	0	0	0	0	0	0	0	0	0	0	0	0	0	0	0	0	0	0	0	0	0	0	0
142	303874	132.5	117.02	147.98	7.9	0	0	0	0	0	0	0	0	0	0	0	0	0	0	0	0	0	0	0	0	0	0	0	0	0	0	0	0	0	0	0	0	0	0	0	0	0	0	0
143	306014	132.7	117.12	148.28	7.95	0	0	0	0	0	0	0	0	0	0	0	0	0	0	0	0	0	0	0	0	0	0	0	0	0	0	0	0	0	0	0	0	0	0	0	0	0	0	0
144	308154	132.9	117.22	148.58	8	0	0	0	0	0	0	0	0	0	0	0	0	0	0	0	0	0	0	0	0	0	0	0	0	0	0	0	0	0	0	0	0	0	0	0	0	0	0	0
145	310294	133.1	117.32	148.88	8.05	0	0	0	0	0	0	0	0	0	0	0	0	0	0	0	0	0	0	0	0	0	0	0	0	0	0	0	0	0	0	0	0	0	0	0	0	0	0	0
146	312434	133.29	117.42	149.17	8.1	0	0	0	0	0	0	0	0	0	0	0	0	0	0	0	0	0	0	0	0	0	0	0	0	0	0	0	0	0	0	0	0	0	0	0	0	0	0	0
147	314574	133.49	117.51	149.47	8.15	0	0	0	0	0	0	0	0	0	0	0	0	0	0	0	0	0	0	0	0	0	0	0	0	0	0	0	0	0	0	0	0	0	0	0	0	0	0	0
148	316714	133.68	117.6	149.76	8.2	0	0	0	0	0	0	0	0	0	0	0	0	0	0	0	0	0	0	0	0	0	0	0	0	0	0	0	0	0	0	0	0	0	0	0	0	0	0	0
149	318854	133.87	117.69	150.05	8.25	0	0	0	0	0	0	0	0	0	0	0	0	0	0	0	0	0	0	0	0	0	0	0	0	0	0	0	0	0	0	0	0	0	0	0	0	0	0	0
150	320994	134.06	117.78	150.33	8.31	0	0	0	0	0	0	0	0	0	0	0	0	0	0	0	0	0	0	0	0	0	0	0	0	0	0	0	0	0	0	0	0	0	0	0	0	0	0	0
151	323134	134.24	117.86	150.62	8.36	0	0	0	0	0	0	0	0	0	0	0	0	0	0	0	0	0	0	0	0	0	0	0	0	0	0	0	0	0	0	0	0	0	0	0	0	0	0	0
152	325274	134.42	117.94	150.9	8.41	0	0	0	0	0	0	0	0	0	0	0	0	0	0	0	0	0	0	0	0	0	0	0	0	0	0	0	0	0	0	0	0	0	0	0	0	0	0	0
153	327414	134.6	118.02	151.19	8.46	0	0	0	0	0	0	0	0	0	0	0	0	0	0	0	0	0	0	0	0	0	0	0	0	0	0	0	0	0	0	0	0	0	0	0	0	0	0	0
154	329554	134.78	118.1	151.47	8.51	0	0	0	0	0	0	0	0	0	0	0	0	0	0	0	0	0	0	0	0	0	0	0	0	0	0	0	0	0	0	0	0	0	0	0	0	0	0	0
155	331694	134.96	118.17	151.74	8.56	0	0	0	0	0	0	0	0	0	0	0	0	0	0	0	0	0	0	0	0	0	0	0	0	0	0	0	0	0	0	0	0	0	0	0	0	0	0	0
156	333834	135.13	118.25	152.02	8.62	0	0	0	0	0	0	0	0	0	0	0	0	0	0	0	0	0	0	0	0	0	0	0	0	0	0	0	0	0	0	0	0	0	0	0	0	0	0	0
157	335974	135.31	118.32	152.3	8.67	0	0	0	0	0	0	0	0	0	0	0	0	0	0	0	0	0	0	0	0	0	0	0	0	0	0	0	0	0	0	0	0	0	0	0	0	0	0	0
158	338114	135.48	118.39	152.57	8.72	0	0	0	0	0	0	0	0	0	0	0	0	0	0	0	0	0	0	0	0	0	0	0	0	0	0	0	0	0	0	0	0	0	0	0	0	0	0	0
159	340254	135.65	118.45	152.84	8.77	0	0	0	0	0	0	0	0	0	0	0	0	0	0	0	0	0	0	0	0	0	0	0	0	0	0	0	0	0	0	0	0	0	0	0	0	0	0	0
160	342394	135.81	118.52	153.11	8.82	0	0	0	0	0	0	0	0	0	0	0	0	0	0	0	0	0	0	0	0	0	0	0	0	0	0	0	0	0	0	0	0	0	0	0	0	0	0	0
161	344534	135.98	118.58	153.37	8.88	0	0	0	0	0	0	0	0	0	0	0	0	0	0	0	0	0	0	0	0	0	0	0	0	0	0	0	0	0	0	0	0	0	0	0	0	0	0	0
162	346674	136.14	118.64	153.64	8.93	0	0	0	0	0	0	0	0	0	0	0	0	0	0	0	0	0	0	0	0	0	0	0	0	0	0	0	0	0	0	0	0	0	0	0	0	0	0	0
163	348813	136.3	118.7	153.9	8.98	0	0	0	0	0	0	0	0	0	0	0	0	0	0	0	0	0	0	0	0	0	0	0	0	0	0	0	0	0	0	0	0	0	0	0	0	0	0	0
164	350953	136.46	118.76	154.16	9.03	0	0	0	0	0	0	0	0	0	0	0	0	0	0	0	0	0	0	0	0	0	0	0	0	0	0	0	0	0	0	0	0	0	0	0	0	0	0	0
165	353093	136.62	118.82	154.42	9.08	0	0	0	0	0	0	0	0	0	0	0	0	0	0	0	0	0	0	0	0	0	0	0	0	0	0	0	0	0	0	0	0	0	0	0	0	0	0	0
166	355233	136.78	118.87	154.68	9.14	0	0	0	0	0	0	0	0	0	0	0	0	0	0	0	0	0	0	0	0	0	0	0	0	0	0	0	0	0	0	0	0	0	0	0	0	0	0	0
167	357373	136.93	118.92	154.94	9.19	0	0	0	0	0	0	0	0	0	0	0	0	0	0	0	0	0	0	0	0	0	0	0	0	0	0	0	0	0	0	0	0	0	0	0	0	0	0	0
168	359513	137.08	118.97	155.19	9.24	0	0	0	0	0	0	0	0	0	0	0	0	0	0	0	0	0	0	0	0	0	0	0	0	0	0	0	0	0	0	0	0	0	0	0	0	0	0	0
169	361653	137.23	119.02	155.44	9.29	0	0	0	0	0	0	0	0	0	0	0	0	0	0	0	0	0	0	0	0	0	0	0	0	0	0	0	0	0	0	0	0	0	0	0	0	0	0	0
170	363793	137.38	119.07	155.69	9.34	0	0	0	0	0	0	0	0	0	0	0	0	0	0	0	0	0	0	0	0	0	0	0	0	0	0	0	0	0	0	0	0	0	0	0	0	0	0	0
171	365933	137.53	119.12	155.94	9.39	0	0	0	0	0	0	0	0	0	0	0	0	0	0	0	0	0	0	0	0	0	0	0	0	0	0	0	0	0	0	0	0	0	0	0	0	0	0	0
172	368073	137.68	119.16	156.19	9.45	0	0	0	0	0	0	0	0	0	0	0	0	0	0	0	0	0	0	0	0	0	0	0	0	0	0	0	0	0	0	0	0	0	0	0	0	0	0	0
173	370213	137.82	119.2	156.43	9.5	0	0	0	0	0	0	0	0	0	0	0	0	0	0	0	0	0	0	0	0	0	0	0	0	0	0	0	0	0	0	0	0	0	0	0	0	0	0	0
174	372353	137.96	119.25	156.68	9.55	0	0	0	0	0	0	0	0	0	0	0	0	0	0	0	0	0	0	0	0	0	0	0	0	0	0	0	0	0	0	0	0	0	0	0	0	0	0	0
175	374493	138.1	119.29	156.92	9.6	0	0	0	0	0	0	0	0	0	0	0	0	0	0	0	0	0	0	0	0	0	0	0	0	0	0	0	0	0	0	0	0	0	0	0	0	0	0	0
176	376633	138.24	119.32	157.16	9.65	0	0	0	0	0	0	0	0	0	0	0	0	0	0	0	0	0	0	0	0	0	0	0	0	0	0	0	0	0	0	0	0	0	0	0	0	0	0	0
177	378773	138.38	119.36	157.4	9.7	0	0	0	0	0	0	0	0	0	0	0	0	0	0	0	0	0	0	0	0	0	0	0	0	0	0	0	0	0	0	0	0	0	0	0	0	0	0	0
178	380913	138.52	119.4	157.63	9.75	0	0	0	0	0	0	0	0	0	0	0	0	0	0	0	0	0	0	0	0	0	0	0	0	0	0	0	0	0	0	0	0	0	0	0	0	0	0	0
179	383053	138.65	119.43	157.87	9.81	0	0	0	0	0	0	0	0	0	0	0	0	0	0	0	0	0	0	0	0	0	0	0	0	0	0	0	0	0	0	0	0	0	0	0	0	0	0	0
180	385193	138.78	119.46	158.1	9.86	0	0	0	0	0	0	0	0	0	0	0	0	0	0	0	0	0	0	0	0	0	0	0	0	0	0	0	0	0	0	0	0	0	0	0	0	0	0	0
181	387333	138.91	119.49	158.33	9.91	0	0	0	0	0	0	0	0	0	0	0	0	0	0	0	0	0	0	0	0	0	0	0	0	0	0	0	0	0	0	0	0	0	0	0	0	0	0	0
182	389473	139.04	119.53	158.56	9.96	0	0	0	0	0	0	0	0	0	0	0	0	0	0	0	0	0	0	0	0	0	0	0	0	0	0	0	0	0	0	0	0	0	0	0	0	0	0	0
183	391613	139.17	119.55	158.79	10.01	0	0	0	0	0	0	0	0	0	0	0	0	0	0	0	0	0	0	0	0	0	0	0	0	0	0	0	0	0	0	0	0	0	0	0	0	0	0	0
184	393753	139.3	119.58	159.02	10.06	0	0	0	0	0	0	0	0	0	0	0	0	0	0	0	0	0	0	0	0	0	0	0	0	0	0	0	0	0	0	0	0	0	0	0	0	0	0	0
185	395893	139.42	119.61	159.24	10.11	0	0	0	0	0	0	0	0	0	0	0	0	0	0	0	0	0	0	0	0	0	0	0	0	0	0	0	0	0	0	0	0	0	0	0	0	0	0	0
186	398033	139.55	119.63	159.46	10.16	0	0	0	0	0	0	0	0	0	0	0	0	0	0	0	0	0	0	0	0	0	0	0	0	0	0	0	0	0	0	0	0	0	0	0	0	0	0	0
187	400173	139.67	119.66	159.68	10.21	0	0	0	0	0	0	0	0	0	0	0	0	0	0	0	0	0	0	0	0	0	0	0	0	0	0	0	0	0	0	0	0	0	0	0	0	0	0	0
188	402312	139.79	119.68	159.9	10.26	0	0	0	0	0	0	0	0	0	0	0	0	0	0	0	0	0	0	0	0	0	0	0	0	0	0	0	0	0	0	0	0	0	0	0	0	0	0	0
189	404452	139.91	119.7	160.12	10.31	0	0	0	0	0	0	0	0	0	0	0	0	0	0	0	0	0	0	0	0	0	0	0	0	0	0	0	0	0	0	0	0	0	0	0	0	0	0	0
190	406592	140.03	119.72	160.34	10.36	0	0	0	0	0	0	0	0	0	0	0	0	0	0	0	0	0	0	0	0	0	0	0	0	0	0	0	0	0	0	0	0	0	0	0	0	0	0	0
191	408732	140.15	119.74	160.55	10.41	0	0	0	0	0	0	0	0	0	0	0	0	0	0	0	0	0	0	0	0	0	0	0	0	0	0	0	0	0	0	0	0	0	0	0	0	0	0	0
192	410872	140.26	119.76	160.77	10.46	0	0	0	0	0	0	0	0	0	0	0	0	0	0	0	0	0	0	0	0	0	0	0	0	0	0	0	0	0	0	0	0	0	0	0	0	0	0	0
193	413012	140.38	119.78	160.98	10.51	0	0	0	0	0	0	0	0	0	0	0	0	0	0	0	0	0	0	0	0	0	0	0	0	0	0	0	0	0	0	0	0	0	0	0	0	0	0	0
194	415152	140.49	119.8	161.19	10.56	0	0	0	0	0	0	0	0	0	0	0	0	0	0	0	0	0	0	0	0	0	0	0	0	0	0	0	0	0	0	0	0	0	0	0	0	0	0	0
195	417292	140.6	119.81	161.4	10.61	0	0	0	0	0	0	0	0	0	0	0	0	0	0	0	0	0	0	0	0	0	0	0	0	0	0	0	0	0	0	0	0	0	0	0	0	0	0	0
196	419432	140.72	119.83	161.6	10.66	0	0	0	0	0	0	0	0	0	0	0	0	0	0	0	0	0	0	0	0	0	0	0	0	0	0	0	0	0	0	0	0	0	0	0	0	0	0	0
197	421572	140.82	119.84	161.81	10.71	0	0	0	0	0	0	0	0	0	0	0	0	0	0	0	0	0	0	0	0	0	0	0	0	0	0	0	0	0	0	0	0	0	0	0	0	0	0	0
198	423712	140.93	119.85	162.01	10.75	0	0	0	0	0	0	0	0	0	0	0	0	0	0	0	0	0	0	0	0	0	0	0	0	0	0	0	0	0	0	0	0	0	0	0	0	0	0	0
199	425852	141.04	119.87	162.21	10.8	0	0	0	0	0	0	0	0	0	0	0	0	0	0	0	0	0	0	0	0	0	0	0	0	0	0	0	0	0	0	0	0	0	0	0	0	0	0	0
200	427992	141.15	119.88	162.41	10.85	0	0	0	0	0	0	0	0	0	0	0	0	0	0	0	0	0	0	0	0	0	0	0	0	0	0	0	0	0	0	0	0	0	0	0	0	0	0	0
201	430132	141.25	119.89	162.61	10.9	0	0	0	0	0	0	0	0	0	0	0	0	0	0	0	0	0	0	0	0	0	0	0	0	0	0	0	0	0	0	0	0	0	0	0	0	0	0	0
202	432272	141.35	119.9	162.81	10.95	0	0	0	0	0	0	0	0	0	0	0	0	0	0	0	0	0	0	0	0	0	0	0	0	0	0	0	0	0	0	0	0	0	0	0	0	0	0	0
203	434412	141.46	119.91	163.01	10.99	0	0	0	0	0	0	0	0	0	0	0	0	0	0	0	0	0	0	0	0	0	0	0	0	0	0	0	0	0	0	0	0	0	0	0	0	0	0	0
204	436552	141.56	119.91	163.2	11.04	0	0	0	0	0	0	0	0	0	0	0	0	0	0	0	0	0	0	0	0	0	0	0	0	0	0	0	0	0	0	0	0	0	0	0	0	0	0	0
205	438692	141.66	119.92	163.39	11.09	0	0	0	0	0	0	0	0	0	0	0	0	0	0	0	0	0	0	0	0	0	0	0	0	0	0	0	0	0	0	0	0	0	0	0	0	0	0	0
206	440832	141.76	119.93	163.58	11.14	0	0	0	0	0	0	0	0	0	0	0	0	0	0	0	0	0	0	0	0	0	0	0	0	0	0	0	0	0	0	0	0	0	0	0	0	0	0	0
207	442972	141.85	119.93	163.77	11.18	0	0	0	0	0	0	0	0	0	0	0	0	0	0	0	0	0	0	0	0	0	0	0	0	0	0	0	0	0	0	0	0	0	0	0	0	0	0	0
208	445112	141.95	119.94	163.96	11.23	0	0	0	0	0	0	0	0	0	0	0	0	0	0	0	0	0	0	0	0	0	0	0	0	0	0	0	0	0	0	0	0	0	0	0	0	0	0	0
209	447252	142.05	119.94	164.15	11.28	0	0	0	0	0	0	0	0	0	0	0	0	0	0	0	0	0	0	0	0	0	0	0	0	0	0	0	0	0	0	0	0	0	0	0	0	0	0	0
210	449392	142.14	119.95	164.33	11.32	0	0	0	0	0	0	0	0	0	0	0	0	0	0	0	0	0	0	0	0	0	0	0	0	0	0	0	0	0	0	0	0	0	0	0	0	0	0	0
211	451532	142.23	119.95	164.52	11.37	0	0	0	0	0	0	0	0	0	0	0	0	0	0	0	0	0	0	0	0	0	0	0	0	0	0	0	0	0	0	0	0	0	0	0	0	0	0	0
212	453672	142.33	119.95	164.7	11.42	0	0	0	0	0	0	0	0	0	0	0	0	0	0	0	0	0	0	0	0	0	0	0	0	0	0	0	0	0	0	0	0	0	0	0	0	0	0	0
213	455811	142.42	119.95	164.88	11.46	0	0	0	0	0	0	0	0	0	0	0	0	0	0	0	0	0	0	0	0	0	0	0	0	0	0	0	0	0	0	0	0	0	0	0	0	0	0	0
214	457951	142.51	119.95	165.06	11.51	0	0	0	0	0	0	0	0	0	0	0	0	0	0	0	0	0	0	0	0	0	0	0	0	0	0	0	0	0	0	0	0	0	0	0	0	0	0	0
215	460091	142.6	119.95	165.24	11.55	0	0	0	0	0	0	0	0	0	0	0	0	0	0	0	0	0	0	0	0	0	0	0	0	0	0	0	0	0	0	0	0	0	0	0	0	0	0	0
216	462231	142.68	119.95	165.42	11.6	0	0	0	0	0	0	0	0	0	0	0	0	0	0	0	0	0	0	0	0	0	0	0	0	0	0	0	0	0	0	0	0	0	0	0	0	0	0	0
217	464371	142.77	119.95	165.59	11.64	0	0	0	0	0	0	0	0	0	0	0	0	0	0	0	0	0	0	0	0	0	0	0	0	0	0	0	0	0	0	0	0	0	0	0	0	0	0	0
218	466511	142.86	119.95	165.77	11.69	0	0	0	0	0	0	0	0	0	0	0	0	0	0	0	0	0	0	0	0	0	0	0	0	0	0	0	0	0	0	0	0	0	0	0	0	0	0	0
219	468651	142.94	119.95	165.94	11.73	0	0	0	0	0	0	0	0	0	0	0	0	0	0	0	0	0	0	0	0	0	0	0	0	0	0	0	0	0	0	0	0	0	0	0	0	0	0	0
220	470791	143.03	119.94	166.11	11.78	0	0	0	0	0	0	0	0	0	0	0	0	0	0	0	0	0	0	0	0	0	0	0	0	0	0	0	0	0	0	0	0	0	0	0	0	0	0	0
221	472931	143.11	119.94	166.28	11.82	0	0	0	0	0	0	0	0	0	0	0	0	0	0	0	0	0	0	0	0	0	0	0	0	0	0	0	0	0	0	0	0	0	0	0	0	0	0	0
222	475071	143.19	119.94	166.45	11.87	0	0	0	0	0	0	0	0	0	0	0	0	0	0	0	0	0	0	0	0	0	0	0	0	0	0	0	0	0	0	0	0	0	0	0	0	0	0	0
223	477211	143.27	119.93	166.62	11.91	0	0	0	0	0	0	0	0	0	0	0	0	0	0	0	0	0	0	0	0	0	0	0	0	0	0	0	0	0	0	0	0	0	0	0	0	0	0	0
224	479351	143.35	119.93	166.78	11.95	0	0	0	0	0	0	0	0	0	0	0	0	0	0	0	0	0	0	0	0	0	0	0	0	0	0	0	0	0	0	0	0	0	0	0	0	0	0	0
225	481491	143.43	119.92	166.95	12	0	0	0	0	0	0	0	0	0	0	0	0	0	0	0	0	0	0	0	0	0	0	0	0	0	0	0	0	0	0	0	0	0	0	0	0	0	0	0
226	483631	143.51	119.92	167.11	12.04	0	0	0	0	0	0	0	0	0	0	0	0	0	0	0	0	0	0	0	0	0	0	0	0	0	0	0	0	0	0	0	0	0	0	0	0	0	0	0
227	485771	143.59	119.91	167.27	12.08	0	0	0	0	0	0	0	0	0	0	0	0	0	0	0	0	0	0	0	0	0	0	0	0	0	0	0	0	0	0	0	0	0	0	0	0	0	0	0
228	487911	143.67	119.9	167.43	12.13	0	0	0	0	0	0	0	0	0	0	0	0	0	0	0	0	0	0	0	0	0	0	0	0	0	0	0	0	0	0	0	0	0	0	0	0	0	0	0
229	490051	143.74	119.89	167.59	12.17	0	0	0	0	0	0	0	0	0	0	0	0	0	0	0	0	0	0	0	0	0	0	0	0	0	0	0	0	0	0	0	0	0	0	0	0	0	0	0
230	492191	143.82	119.89	167.75	12.21	0	0	0	0	0	0	0	0	0	0	0	0	0	0	0	0	0	0	0	0	0	0	0	0	0	0	0	0	0	0	0	0	0	0	0	0	0	0	0
231	494331	143.89	119.88	167.91	12.25	0	0	0	0	0	0	0	0	0	0	0	0	0	0	0	0	0	0	0	0	0	0	0	0	0	0	0	0	0	0	0	0	0	0	0	0	0	0	0
232	496471	143.97	119.87	168.06	12.29	0	0	0	0	0	0	0	0	0	0	0	0	0	0	0	0	0	0	0	0	0	0	0	0	0	0	0	0	0	0	0	0	0	0	0	0	0	0	0
233	498611	144.04	119.86	168.22	12.34	0	0	0	0	0	0	0	0	0	0	0	0	0	0	0	0	0	0	0	0	0	0	0	0	0	0	0	0	0	0	0	0	0	0	0	0	0	0	0
234	500751	144.11	119.85	168.37	12.38	0	0	0	0	0	0	0	0	0	0	0	0	0	0	0	0	0	0	0	0	0	0	0	0	0	0	0	0	0	0	0	0	0	0	0	0	0	0	0
235	502891	144.18	119.84	168.52	12.42	0	0	0	0	0	0	0	0	0	0	0	0	0	0	0	0	0	0	0	0	0	0	0	0	0	0	0	0	0	0	0	0	0	0	0	0	0	0	0
236	505031	144.25	119.83	168.67	12.46	0	0	0	0	0	0	0	0	0	0	0	0	0	0	0	0	0	0	0	0	0	0	0	0	0	0	0	0	0	0	0	0	0	0	0	0	0	0	0
237	507171	144.32	119.82	168.82	12.5	0	0	0	0	0	0	0	0	0	0	0	0	0	0	0	0	0	0	0	0	0	0	0	0	0	0	0	0	0	0	0	0	0	0	0	0	0	0	0
238	509310	144.39	119.81	168.97	12.54	0	0	0	0	0	0	0	0	0	0	0	0	0	0	0	0	0	0	0	0	0	0	0	0	0	0	0	0	0	0	0	0	0	0	0	0	0	0	0
239	511450	144.46	119.8	169.12	12.58	0	0	0	0	0	0	0	0	0	0	0	0	0	0	0	0	0	0	0	0	0	0	0	0	0	0	0	0	0	0	0	0	0	0	0	0	0	0	0
240	513590	144.53	119.79	169.26	12.62	0	0	0	0	0	0	0	0	0	0	0	0	0	0	0	0	0	0	0	0	0	0	0	0	0	0	0	0	0	0	0	0	0	0	0	0	0	0	0
241	515730	144.59	119.78	169.41	12.66	0	0	0	0	0	0	0	0	0	0	0	0	0	0	0	0	0	0	0	0	0	0	0	0	0	0	0	0	0	0	0	0	0	0	0	0	0	0	0
242	517870	144.66	119.76	169.55	12.7	0	0	0	0	0	0	0	0	0	0	0	0	0	0	0	0	0	0	0	0	0	0	0	0	0	0	0	0	0	0	0	0	0	0	0	0	0	0	0
243	520010	144.72	119.75	169.69	12.74	0	0	0	0	0	0	0	0	0	0	0	0	0	0	0	0	0	0	0	0	0	0	0	0	0	0	0	0	0	0	0	0	0	0	0	0	0	0	0
244	522150	144.79	119.74	169.83	12.78	0	0	0	0	0	0	0	0	0	0	0	0	0	0	0	0	0	0	0	0	0	0	0	0	0	0	0	0	0	0	0	0	0	0	0	0	0	0	0
245	524290	144.85	119.73	169.97	12.82	0	0	0	0	0	0	0	0	0	0	0	0	0	0	0	0	0	0	0	0	0	0	0	0	0	0	0	0	0	0	0	0	0	0	0	0	0	0	0
246	526430	144.91	119.71	170.11	12.86	0	0	0	0	0	0	0	0	0	0	0	0	0	0	0	0	0	0	0	0	0	0	0	0	0	0	0	0	0	0	0	0	0	0	0	0	0	0	0
247	528570	144.97	119.7	170.25	12.9	0	0	0	0	0	0	0	0	0	0	0	0	0	0	0	0	0	0	0	0	0	0	0	0	0	0	0	0	0	0	0	0	0	0	0	0	0	0	0
248	530710	145.04	119.68	170.39	12.93	0	0	0	0	0	0	0	0	0	0	0	0	0	0	0	0	0	0	0	0	0	0	0	0	0	0	0	0	0	0	0	0	0	0	0	0	0	0	0
249	532850	145.1	119.67	170.52	12.97	0	0	0	0	0	0	0	0	0	0	0	0	0	0	0	0	0	0	0	0	0	0	0	0	0	0	0	0	0	0	0	0	0	0	0	0	0	0	0
250	534990	145.16	119.66	170.66	13.01	0	0	0	0	0	0	0	0	0	0	0	0	0	0	0	0	0	0	0	0	0	0	0	0	0	0	0	0	0	0	0	0	0	0	0	0	0	0	0
251	537130	145.21	119.64	170.79	13.05	0	0	0	0	0	0	0	0	0	0	0	0	0	0	0	0	0	0	0	0	0	0	0	0	0	0	0	0	0	0	0	0	0	0	0	0	0	0	0
252	539270	145.27	119.63	170.92	13.09	0	0	0	0	0	0	0	0	0	0	0	0	0	0	0	0	0	0	0	0	0	0	0	0	0	0	0	0	0	0	0	0	0	0	0	0	0	0	0
253	541410	145.33	119.61	171.05	13.12	0	0	0	0	0	0	0	0	0	0	0	0	0	0	0	0	0	0	0	0	0	0	0	0	0	0	0	0	0	0	0	0	0	0	0	0	0	0	0
254	543550	145.39	119.6	171.18	13.16	0	0	0	0	0	0	0	0	0	0	0	0	0	0	0	0	0	0	0	0	0	0	0	0	0	0	0	0	0	0	0	0	0	0	0	0	0	0	0
255	545690	145.44	119.58	171.31	13.2	0	0	0	0	0	0	0	0	0	0	0	0	0	0	0	0	0	0	0	0	0	0	0	0	0	0	0	0	0	0	0	0	0	0	0	0	0	0	0
256	547830	145.5	119.56	171.44	13.23	0	0	0	0	0	0	0	0	0	0	0	0	0	0	0	0	0	0	0	0	0	0	0	0	0	0	0	0	0	0	0	0	0	0	0	0	0	0	0
257	549970	145.56	119.55	171.56	13.27	0	0	0	0	0	0	0	0	0	0	0	0	0	0	0	0	0	0	0	0	0	0	0	0	0	0	0	0	0	0	0	0	0	0	0	0	0	0	0
258	552110	145.61	119.53	171.69	13.3	0	0	0	0	0	0	0	0	0	0	0	0	0	0	0	0	0	0	0	0	0	0	0	0	0	0	0	0	0	0	0	0	0	0	0	0	0	0	0
259	554250	145.66	119.52	171.81	13.34	0	0	0	0	0	0	0	0	0	0	0	0	0	0	0	0	0	0	0	0	0	0	0	0	0	0	0	0	0	0	0	0	0	0	0	0	0	0	0
260	556390	145.72	119.5	171.94	13.38	0	0	0	0	0	0	0	0	0	0	0	0	0	0	0	0	0	0	0	0	0	0	0	0	0	0	0	0	0	0	0	0	0	0	0	0	0	0	0
261	558530	145.77	119.48	172.06	13.41	0	0	0	0	0	0	0	0	0	0	0	0	0	0	0	0	0	0	0	0	0	0	0	0	0	0	0	0	0	0	0	0	0	0	0	0	0	0	0
262	560670	145.82	119.47	172.18	13.45	0	0	0	0	0	0	0	0	0	0	0	0	0	0	0	0	0	0	0	0	0	0	0	0	0	0	0	0	0	0	0	0	0	0	0	0	0	0	0
263	562809	145.87	119.45	172.3	13.48	0	0	0	0	0	0	0	0	0	0	0	0	0	0	0	0	0	0	0	0	0	0	0	0	0	0	0	0	0	0	0	0	0	0	0	0	0	0	0
264	564949	145.93	119.43	172.42	13.52	0	0	0	0	0	0	0	0	0	0	0	0	0	0	0	0	0	0	0	0	0	0	0	0	0	0	0	0	0	0	0	0	0	0	0	0	0	0	0
265	567089	145.98	119.42	172.54	13.55	0	0	0	0	0	0	0	0	0	0	0	0	0	0	0	0	0	0	0	0	0	0	0	0	0	0	0	0	0	0	0	0	0	0	0	0	0	0	0
266	569229	146.03	119.4	172.65	13.59	0	0	0	0	0	0	0	0	0	0	0	0	0	0	0	0	0	0	0	0	0	0	0	0	0	0	0	0	0	0	0	0	0	0	0	0	0	0	0
267	571369	146.08	119.38	172.77	13.62	0	0	0	0	0	0	0	0	0	0	0	0	0	0	0	0	0	0	0	0	0	0	0	0	0	0	0	0	0	0	0	0	0	0	0	0	0	0	0
268	573509	146.12	119.36	172.88	13.65	0	0	0	0	0	0	0	0	0	0	0	0	0	0	0	0	0	0	0	0	0	0	0	0	0	0	0	0	0	0	0	0	0	0	0	0	0	0	0
269	575649	146.17	119.34	173	13.69	0	0	0	0	0	0	0	0	0	0	0	0	0	0	0	0	0	0	0	0	0	0	0	0	0	0	0	0	0	0	0	0	0	0	0	0	0	0	0
270	577789	146.22	119.33	173.11	13.72	0	0	0	0	0	0	0	0	0	0	0	0	0	0	0	0	0	0	0	0	0	0	0	0	0	0	0	0	0	0	0	0	0	0	0	0	0	0	0
271	579929	146.27	119.31	173.22	13.75	0	0	0	0	0	0	0	0	0	0	0	0	0	0	0	0	0	0	0	0	0	0	0	0	0	0	0	0	0	0	0	0	0	0	0	0	0	0	0
272	582069	146.31	119.29	173.34	13.79	0	0	0	0	0	0	0	0	0	0	0	0	0	0	0	0	0	0	0	0	0	0	0	0	0	0	0	0	0	0	0	0	0	0	0	0	0	0	0
273	584209	146.36	119.27	173.45	13.82	0	0	0	0	0	0	0	0	0	0	0	0	0	0	0	0	0	0	0	0	0	0	0	0	0	0	0	0	0	0	0	0	0	0	0	0	0	0	0
274	586349	146.4	119.25	173.56	13.85	0	0	0	0	0	0	0	0	0	0	0	0	0	0	0	0	0	0	0	0	0	0	0	0	0	0	0	0	0	0	0	0	0	0	0	0	0	0	0
275	588489	146.45	119.24	173.66	13.88	0	0	0	0	0	0	0	0	0	0	0	0	0	0	0	0	0	0	0	0	0	0	0	0	0	0	0	0	0	0	0	0	0	0	0	0	0	0	0
276	590629	146.49	119.22	173.77	13.92	0	0	0	0	0	0	0	0	0	0	0	0	0	0	0	0	0	0	0	0	0	0	0	0	0	0	0	0	0	0	0	0	0	0	0	0	0	0	0
277	592769	146.54	119.2	173.88	13.95	0	0	0	0	0	0	0	0	0	0	0	0	0	0	0	0	0	0	0	0	0	0	0	0	0	0	0	0	0	0	0	0	0	0	0	0	0	0	0
278	594909	146.58	119.18	173.98	13.98	0	0	0	0	0	0	0	0	0	0	0	0	0	0	0	0	0	0	0	0	0	0	0	0	0	0	0	0	0	0	0	0	0	0	0	0	0	0	0
279	597049	146.62	119.16	174.09	14.01	0	0	0	0	0	0	0	0	0	0	0	0	0	0	0	0	0	0	0	0	0	0	0	0	0	0	0	0	0	0	0	0	0	0	0	0	0	0	0
280	599189	146.67	119.14	174.19	14.04	0	0	0	0	0	0	0	0	0	0	0	0	0	0	0	0	0	0	0	0	0	0	0	0	0	0	0	0	0	0	0	0	0	0	0	0	0	0	0
281	601329	146.71	119.12	174.3	14.07	0	0	0	0	0	0	0	0	0	0	0	0	0	0	0	0	0	0	0	0	0	0	0	0	0	0	0	0	0	0	0	0	0	0	0	0	0	0	0
282	603469	146.75	119.1	174.4	14.11	0	0	0	0	0	0	0	0	0	0	0	0	0	0	0	0	0	0	0	0	0	0	0	0	0	0	0	0	0	0	0	0	0	0	0	0	0	0	0
283	605609	146.79	119.08	174.5	14.14	0	0	0	0	0	0	0	0	0	0	0	0	0	0	0	0	0	0	0	0	0	0	0	0	0	0	0	0	0	0	0	0	0	0	0	0	0	0	0
284	607749	146.83	119.07	174.6	14.17	0	0	0	0	0	0	0	0	0	0	0	0	0	0	0	0	0	0	0	0	0	0	0	0	0	0	0	0	0	0	0	0	0	0	0	0	0	0	0
285	609889	146.87	119.05	174.7	14.2	0	0	0	0	0	0	0	0	0	0	0	0	0	0	0	0	0	0	0	0	0	0	0	0	0	0	0	0	0	0	0	0	0	0	0	0	0	0	0
286	612029	146.91	119.03	174.8	14.23	0	0	0	0	0	0	0	0	0	0	0	0	0	0	0	0	0	0	0	0	0	0	0	0	0	0	0	0	0	0	0	0	0	0	0	0	0	0	0
287	614169	146.95	119.01	174.9	14.26	0	0	0	0	0	0	0	0	0	0	0	0	0	0	0	0	0	0	0	0	0	0	0	0	0	0	0	0	0	0	0	0	0	0	0	0	0	0	0
288	616308	146.99	118.99	174.99	14.29	0	0	0	0	0	0	0	0	0	0	0	0	0	0	0	0	0	0	0	0	0	0	0	0	0	0	0	0	0	0	0	0	0	0	0	0	0	0	0
289	618448	147.03	118.97	175.09	14.32	0	0	0	0	0	0	0	0	0	0	0	0	0	0	0	0	0	0	0	0	0	0	0	0	0	0	0	0	0	0	0	0	0	0	0	0	0	0	0
290	620588	147.07	118.95	175.18	14.35	0	0	0	0	0	0	0	0	0	0	0	0	0	0	0	0	0	0	0	0	0	0	0	0	0	0	0	0	0	0	0	0	0	0	0	0	0	0	0
291	622728	147.1	118.93	175.28	14.37	0	0	0	0	0	0	0	0	0	0	0	0	0	0	0	0	0	0	0	0	0	0	0	0	0	0	0	0	0	0	0	0	0	0	0	0	0	0	0
292	624868	147.14	118.91	175.37	14.4	0	0	0	0	0	0	0	0	0	0	0	0	0	0	0	0	0	0	0	0	0	0	0	0	0	0	0	0	0	0	0	0	0	0	0	0	0	0	0
293	627008	147.18	118.89	175.46	14.43	0	0	0	0	0	0	0	0	0	0	0	0	0	0	0	0	0	0	0	0	0	0	0	0	0	0	0	0	0	0	0	0	0	0	0	0	0	0	0
294	629148	147.21	118.87	175.56	14.46	0	0	0	0	0	0	0	0	0	0	0	0	0	0	0	0	0	0	0	0	0	0	0	0	0	0	0	0	0	0	0	0	0	0	0	0	0	0	0
295	631288	147.25	118.85	175.65	14.49	0	0	0	0	0	0	0	0	0	0	0	0	0	0	0	0	0	0	0	0	0	0	0	0	0	0	0	0	0	0	0	0	0	0	0	0	0	0	0
296	633428	147.29	118.83	175.74	14.52	0	0	0	0	0	0	0	0	0	0	0	0	0	0	0	0	0	0	0	0	0	0	0	0	0	0	0	0	0	0	0	0	0	0	0	0	0	0	0
297	635568	147.32	118.81	175.83	14.54	0	0	0	0	0	0	0	0	0	0	0	0	0	0	0	0	0	0	0	0	0	0	0	0	0	0	0	0	0	0	0	0	0	0	0	0	0	0	0
298	637708	147.36	118.79	175.92	14.57	0	0	0	0	0	0	0	0	0	0	0	0	0	0	0	0	0	0	0	0	0	0	0	0	0	0	0	0	0	0	0	0	0	0	0	0	0	0	0
299	639848	147.39	118.77	176	14.6	0	0	0	0	0	0	0	0	0	0	0	0	0	0	0	0	0	0	0	0	0	0	0	0	0	0	0	0	0	0	0	0	0	0	0	0	0	0	0
300	641988	147.42	118.76	176.09	14.63	0	0	0	0	0	0	0	0	0	0	0	0	0	0	0	0	0	0	0	0	0	0	0	0	0	0	0	0	0	0	0	0	0	0	0	0	0	0	0
301	644128	147.46	118.74	176.18	14.65	0	0	0	0	0	0	0	0	0	0	0	0	0	0	0	0	0	0	0	0	0	0	0	0	0	0	0	0	0	0	0	0	0	0	0	0	0	0	0
302	646268	147.49	118.72	176.26	14.68	0	0	0	0	0	0	0	0	0	0	0	0	0	0	0	0	0	0	0	0	0	0	0	0	0	0	0	0	0	0	0	0	0	0	0	0	0	0	0
303	648408	147.52	118.7	176.35	14.71	0	0	0	0	0	0	0	0	0	0	0	0	0	0	0	0	0	0	0	0	0	0	0	0	0	0	0	0	0	0	0	0	0	0	0	0	0	0	0
304	650548	147.55	118.68	176.43	14.73	0	0	0	0	0	0	0	0	0	0	0	0	0	0	0	0	0	0	0	0	0	0	0	0	0	0	0	0	0	0	0	0	0	0	0	0	0	0	0
305	652688	147.59	118.66	176.52	14.76	0	0	0	0	0	0	0	0	0	0	0	0	0	0	0	0	0	0	0	0	0	0	0	0	0	0	0	0	0	0	0	0	0	0	0	0	0	0	0
306	654828	147.62	118.64	176.6	14.79	0	0	0	0	0	0	0	0	0	0	0	0	0	0	0	0	0	0	0	0	0	0	0	0	0	0	0	0	0	0	0	0	0	0	0	0	0	0	0
307	656968	147.65	118.62	176.68	14.81	0	0	0	0	0	0	0	0	0	0	0	0	0	0	0	0	0	0	0	0	0	0	0	0	0	0	0	0	0	0	0	0	0	0	0	0	0	0	0
308	659108	147.68	118.6	176.76	14.84	0	0	0	0	0	0	0	0	0	0	0	0	0	0	0	0	0	0	0	0	0	0	0	0	0	0	0	0	0	0	0	0	0	0	0	0	0	0	0
309	661248	147.71	118.58	176.84	14.86	0	0	0	0	0	0	0	0	0	0	0	0	0	0	0	0	0	0	0	0	0	0	0	0	0	0	0	0	0	0	0	0	0	0	0	0	0	0	0
310	663388	147.74	118.56	176.92	14.89	0	0	0	0	0	0	0	0	0	0	0	0	0	0	0	0	0	0	0	0	0	0	0	0	0	0	0	0	0	0	0	0	0	0	0	0	0	0	0
311	665528	147.77	118.54	177	14.91	0	0	0	0	0	0	0	0	0	0	0	0	0	0	0	0	0	0	0	0	0	0	0	0	0	0	0	0	0	0	0	0	0	0	0	0	0	0	0
312	667668	147.8	118.52	177.08	14.94	0	0	0	0	0	0	0	0	0	0	0	0	0	0	0	0	0	0	0	0	0	0	0	0	0	0	0	0	0	0	0	0	0	0	0	0	0	0	0
313	669807	147.83	118.5	177.16	14.96	0	0	0	0	0	0	0	0	0	0	0	0	0	0	0	0	0	0	0	0	0	0	0	0	0	0	0	0	0	0	0	0	0	0	0	0	0	0	0
314	671947	147.86	118.48	177.23	14.99	0	0	0	0	0	0	0	0	0	0	0	0	0	0	0	0	0	0	0	0	0	0	0	0	0	0	0	0	0	0	0	0	0	0	0	0	0	0	0
315	674087	147.89	118.46	177.31	15.01	0	0	0	0	0	0	0	0	0	0	0	0	0	0	0	0	0	0	0	0	0	0	0	0	0	0	0	0	0	0	0	0	0	0	0	0	0	0	0
316	676227	147.92	118.44	177.39	15.04	0	0	0	0	0	0	0	0	0	0	0	0	0	0	0	0	0	0	0	0	0	0	0	0	0	0	0	0	0	0	0	0	0	0	0	0	0	0	0
317	678367	147.94	118.42	177.46	15.06	0	0	0	0	0	0	0	0	0	0	0	0	0	0	0	0	0	0	0	0	0	0	0	0	0	0	0	0	0	0	0	0	0	0	0	0	0	0	0
318	680507	147.97	118.41	177.54	15.08	0	0	0	0	0	0	0	0	0	0	0	0	0	0	0	0	0	0	0	0	0	0	0	0	0	0	0	0	0	0	0	0	0	0	0	0	0	0	0
319	682647	148	118.39	177.61	15.11	0	0	0	0	0	0	0	0	0	0	0	0	0	0	0	0	0	0	0	0	0	0	0	0	0	0	0	0	0	0	0	0	0	0	0	0	0	0	0
320	684787	148.02	118.37	177.68	15.13	0	0	0	0	0	0	0	0	0	0	0	0	0	0	0	0	0	0	0	0	0	0	0	0	0	0	0	0	0	0	0	0	0	0	0	0	0	0	0
321	686927	148.05	118.35	177.76	15.15	0	0	0	0	0	0	0	0	0	0	0	0	0	0	0	0	0	0	0	0	0	0	0	0	0	0	0	0	0	0	0	0	0	0	0	0	0	0	0
322	689067	148.08	118.33	177.83	15.18	0	0	0	0	0	0	0	0	0	0	0	0	0	0	0	0	0	0	0	0	0	0	0	0	0	0	0	0	0	0	0	0	0	0	0	0	0	0	0
323	691207	148.1	118.31	177.9	15.2	0	0	0	0	0	0	0	0	0	0	0	0	0	0	0	0	0	0	0	0	0	0	0	0	0	0	0	0	0	0	0	0	0	0	0	0	0	0	0
324	693347	148.13	118.29	177.97	15.22	0	0	0	0	0	0	0	0	0	0	0	0	0	0	0	0	0	0	0	0	0	0	0	0	0	0	0	0	0	0	0	0	0	0	0	0	0	0	0
325	695487	148.15	118.27	178.04	15.25	0	0	0	0	0	0	0	0	0	0	0	0	0	0	0	0	0	0	0	0	0	0	0	0	0	0	0	0	0	0	0	0	0	0	0	0	0	0	0
326	697627	148.18	118.25	178.11	15.27	0	0	0	0	0	0	0	0	0	0	0	0	0	0	0	0	0	0	0	0	0	0	0	0	0	0	0	0	0	0	0	0	0	0	0	0	0	0	0
327	699767	148.21	118.23	178.18	15.29	0	0	0	0	0	0	0	0	0	0	0	0	0	0	0	0	0	0	0	0	0	0	0	0	0	0	0	0	0	0	0	0	0	0	0	0	0	0	0
328	701907	148.23	118.22	178.24	15.31	0	0	0	0	0	0	0	0	0	0	0	0	0	0	0	0	0	0	0	0	0	0	0	0	0	0	0	0	0	0	0	0	0	0	0	0	0	0	0
329	704047	148.25	118.2	178.31	15.34	0	0	0	0	0	0	0	0	0	0	0	0	0	0	0	0	0	0	0	0	0	0	0	0	0	0	0	0	0	0	0	0	0	0	0	0	0	0	0
330	706187	148.28	118.18	178.38	15.36	0	0	0	0	0	0	0	0	0	0	0	0	0	0	0	0	0	0	0	0	0	0	0	0	0	0	0	0	0	0	0	0	0	0	0	0	0	0	0
331	708327	148.3	118.16	178.44	15.38	0	0	0	0	0	0	0	0	0	0	0	0	0	0	0	0	0	0	0	0	0	0	0	0	0	0	0	0	0	0	0	0	0	0	0	0	0	0	0
332	710467	148.33	118.14	178.51	15.4	0	0	0	0	0	0	0	0	0	0	0	0	0	0	0	0	0	0	0	0	0	0	0	0	0	0	0	0	0	0	0	0	0	0	0	0	0	0	0
333	712607	148.35	118.12	178.57	15.42	0	0	0	0	0	0	0	0	0	0	0	0	0	0	0	0	0	0	0	0	0	0	0	0	0	0	0	0	0	0	0	0	0	0	0	0	0	0	0
334	714747	148.37	118.1	178.64	15.44	0	0	0	0	0	0	0	0	0	0	0	0	0	0	0	0	0	0	0	0	0	0	0	0	0	0	0	0	0	0	0	0	0	0	0	0	0	0	0
335	716887	148.39	118.09	178.7	15.46	0	0	0	0	0	0	0	0	0	0	0	0	0	0	0	0	0	0	0	0	0	0	0	0	0	0	0	0	0	0	0	0	0	0	0	0	0	0	0
336	719027	148.42	118.07	178.77	15.48	0	0	0	0	0	0	0	0	0	0	0	0	0	0	0	0	0	0	0	0	0	0	0	0	0	0	0	0	0	0	0	0	0	0	0	0	0	0	0
337	721167	148.44	118.05	178.83	15.51	0	0	0	0	0	0	0	0	0	0	0	0	0	0	0	0	0	0	0	0	0	0	0	0	0	0	0	0	0	0	0	0	0	0	0	0	0	0	0
338	723306	148.46	118.03	178.89	15.53	0	0	0	0	0	0	0	0	0	0	0	0	0	0	0	0	0	0	0	0	0	0	0	0	0	0	0	0	0	0	0	0	0	0	0	0	0	0	0
339	725446	148.48	118.01	178.95	15.55	0	0	0	0	0	0	0	0	0	0	0	0	0	0	0	0	0	0	0	0	0	0	0	0	0	0	0	0	0	0	0	0	0	0	0	0	0	0	0
340	727586	148.5	117.99	179.01	15.57	0	0	0	0	0	0	0	0	0	0	0	0	0	0	0	0	0	0	0	0	0	0	0	0	0	0	0	0	0	0	0	0	0	0	0	0	0	0	0
341	729726	148.53	117.98	179.07	15.59	0	0	0	0	0	0	0	0	0	0	0	0	0	0	0	0	0	0	0	0	0	0	0	0	0	0	0	0	0	0	0	0	0	0	0	0	0	0	0
342	731866	148.55	117.96	179.13	15.61	0	0	0	0	0	0	0	0	0	0	0	0	0	0	0	0	0	0	0	0	0	0	0	0	0	0	0	0	0	0	0	0	0	0	0	0	0	0	0
343	734006	148.57	117.94	179.19	15.63	0	0	0	0	0	0	0	0	0	0	0	0	0	0	0	0	0	0	0	0	0	0	0	0	0	0	0	0	0	0	0	0	0	0	0	0	0	0	0
344	736146	148.59	117.92	179.25	15.65	0	0	0	0	0	0	0	0	0	0	0	0	0	0	0	0	0	0	0	0	0	0	0	0	0	0	0	0	0	0	0	0	0	0	0	0	0	0	0
345	738286	148.61	117.9	179.31	15.66	0	0	0	0	0	0	0	0	0	0	0	0	0	0	0	0	0	0	0	0	0	0	0	0	0	0	0	0	0	0	0	0	0	0	0	0	0	0	0
346	740426	148.63	117.89	179.37	15.68	0	0	0	0	0	0	0	0	0	0	0	0	0	0	0	0	0	0	0	0	0	0	0	0	0	0	0	0	0	0	0	0	0	0	0	0	0	0	0
347	742566	148.65	117.87	179.42	15.7	0	0	0	0	0	0	0	0	0	0	0	0	0	0	0	0	0	0	0	0	0	0	0	0	0	0	0	0	0	0	0	0	0	0	0	0	0	0	0
348	744706	148.67	117.85	179.48	15.72	0	0	0	0	0	0	0	0	0	0	0	0	0	0	0	0	0	0	0	0	0	0	0	0	0	0	0	0	0	0	0	0	0	0	0	0	0	0	0
349	746846	148.69	117.83	179.54	15.74	0	0	0	0	0	0	0	0	0	0	0	0	0	0	0	0	0	0	0	0	0	0	0	0	0	0	0	0	0	0	0	0	0	0	0	0	0	0	0
350	748986	148.71	117.82	179.59	15.76	0	0	0	0	0	0	0	0	0	0	0	0	0	0	0	0	0	0	0	0	0	0	0	0	0	0	0	0	0	0	0	0	0	0	0	0	0	0	0
351	751126	148.72	117.8	179.65	15.78	0	0	0	0	0	0	0	0	0	0	0	0	0	0	0	0	0	0	0	0	0	0	0	0	0	0	0	0	0	0	0	0	0	0	0	0	0	0	0
352	753266	148.74	117.78	179.7	15.8	0	0	0	0	0	0	0	0	0	0	0	0	0	0	0	0	0	0	0	0	0	0	0	0	0	0	0	0	0	0	0	0	0	0	0	0	0	0	0
353	755406	148.76	117.77	179.76	15.81	0	0	0	0	0	0	0	0	0	0	0	0	0	0	0	0	0	0	0	0	0	0	0	0	0	0	0	0	0	0	0	0	0	0	0	0	0	0	0
354	757546	148.78	117.75	179.81	15.83	0	0	0	0	0	0	0	0	0	0	0	0	0	0	0	0	0	0	0	0	0	0	0	0	0	0	0	0	0	0	0	0	0	0	0	0	0	0	0
355	759686	148.8	117.73	179.86	15.85	0	0	0	0	0	0	0	0	0	0	0	0	0	0	0	0	0	0	0	0	0	0	0	0	0	0	0	0	0	0	0	0	0	0	0	0	0	0	0
356	761826	148.82	117.71	179.92	15.87	0	0	0	0	0	0	0	0	0	0	0	0	0	0	0	0	0	0	0	0	0	0	0	0	0	0	0	0	0	0	0	0	0	0	0	0	0	0	0
357	763966	148.83	117.7	179.97	15.89	0	0	0	0	0	0	0	0	0	0	0	0	0	0	0	0	0	0	0	0	0	0	0	0	0	0	0	0	0	0	0	0	0	0	0	0	0	0	0
358	766106	148.85	117.68	180.02	15.9	0	0	0	0	0	0	0	0	0	0	0	0	0	0	0	0	0	0	0	0	0	0	0	0	0	0	0	0	0	0	0	0	0	0	0	0	0	0	0
359	768246	148.87	117.66	180.07	15.92	0	0	0	0	0	0	0	0	0	0	0	0	0	0	0	0	0	0	0	0	0	0	0	0	0	0	0	0	0	0	0	0	0	0	0	0	0	0	0
360	770386	148.89	117.65	180.12	15.94	0	0	0	0	0	0	0	0	0	0	0	0	0	0	0	0	0	0	0	0	0	0	0	0	0	0	0	0	0	0	0	0	0	0	0	0	0	0	0
361	772526	148.9	117.63	180.17	15.95	0	0	0	0	0	0	0	0	0	0	0	0	0	0	0	0	0	0	0	0	0	0	0	0	0	0	0	0	0	0	0	0	0	0	0	0	0	0	0
362	774666	148.92	117.61	180.22	15.97	0	0	0	0	0	0	0	0	0	0	0	0	0	0	0	0	0	0	0	0	0	0	0	0	0	0	0	0	0	0	0	0	0	0	0	0	0	0	0
363	776805	148.94	117.6	180.27	15.99	0	0	0	0	0	0	0	0	0	0	0	0	0	0	0	0	0	0	0	0	0	0	0	0	0	0	0	0	0	0	0	0	0	0	0	0	0	0	0
364	778945	148.95	117.58	180.32	16	0	0	0	0	0	0	0	0	0	0	0	0	0	0	0	0	0	0	0	0	0	0	0	0	0	0	0	0	0	0	0	0	0	0	0	0	0	0	0
365	781085	148.97	117.57	180.37	16.02	0	0	0	0	0	0	0	0	0	0	0	0	0	0	0	0	0	0	0	0	0	0	0	0	0	0	0	0	0	0	0	0	0	0	0	0	0	0	0
366	783225	148.98	117.55	180.42	16.04	0	0	0	0	0	0	0	0	0	0	0	0	0	0	0	0	0	0	0	0	0	0	0	0	0	0	0	0	0	0	0	0	0	0	0	0	0	0	0
367	785365	149	117.53	180.47	16.05	0	0	0	0	0	0	0	0	0	0	0	0	0	0	0	0	0	0	0	0	0	0	0	0	0	0	0	0	0	0	0	0	0	0	0	0	0	0	0
368	787505	149.01	117.52	180.51	16.07	0	0	0	0	0	0	0	0	0	0	0	0	0	0	0	0	0	0	0	0	0	0	0	0	0	0	0	0	0	0	0	0	0	0	0	0	0	0	0
369	789645	149.03	117.5	180.56	16.09	0	0	0	0	0	0	0	0	0	0	0	0	0	0	0	0	0	0	0	0	0	0	0	0	0	0	0	0	0	0	0	0	0	0	0	0	0	0	0
370	791785	149.05	117.49	180.61	16.1	0	0	0	0	0	0	0	0	0	0	0	0	0	0	0	0	0	0	0	0	0	0	0	0	0	0	0	0	0	0	0	0	0	0	0	0	0	0	0
371	793925	149.06	117.47	180.65	16.12	0	0	0	0	0	0	0	0	0	0	0	0	0	0	0	0	0	0	0	0	0	0	0	0	0	0	0	0	0	0	0	0	0	0	0	0	0	0	0
372	796065	149.08	117.45	180.7	16.13	0	0	0	0	0	0	0	0	0	0	0	0	0	0	0	0	0	0	0	0	0	0	0	0	0	0	0	0	0	0	0	0	0	0	0	0	0	0	0
373	798205	149.09	117.44	180.74	16.15	0	0	0	0	0	0	0	0	0	0	0	0	0	0	0	0	0	0	0	0	0	0	0	0	0	0	0	0	0	0	0	0	0	0	0	0	0	0	0
374	800345	149.1	117.42	180.79	16.16	0	0	0	0	0	0	0	0	0	0	0	0	0	0	0	0	0	0	0	0	0	0	0	0	0	0	0	0	0	0	0	0	0	0	0	0	0	0	0
375	802485	149.12	117.41	180.83	16.18	0	0	0	0	0	0	0	0	0	0	0	0	0	0	0	0	0	0	0	0	0	0	0	0	0	0	0	0	0	0	0	0	0	0	0	0	0	0	0
376	804625	149.13	117.39	180.87	16.19	0	0	0	0	0	0	0	0	0	0	0	0	0	0	0	0	0	0	0	0	0	0	0	0	0	0	0	0	0	0	0	0	0	0	0	0	0	0	0
377	806765	149.15	117.38	180.92	16.21	0	0	0	0	0	0	0	0	0	0	0	0	0	0	0	0	0	0	0	0	0	0	0	0	0	0	0	0	0	0	0	0	0	0	0	0	0	0	0
378	808905	149.16	117.36	180.96	16.22	0	0	0	0	0	0	0	0	0	0	0	0	0	0	0	0	0	0	0	0	0	0	0	0	0	0	0	0	0	0	0	0	0	0	0	0	0	0	0
379	811045	149.18	117.35	181	16.24	0	0	0	0	0	0	0	0	0	0	0	0	0	0	0	0	0	0	0	0	0	0	0	0	0	0	0	0	0	0	0	0	0	0	0	0	0	0	0
380	813185	149.19	117.33	181.05	16.25	0	0	0	0	0	0	0	0	0	0	0	0	0	0	0	0	0	0	0	0	0	0	0	0	0	0	0	0	0	0	0	0	0	0	0	0	0	0	0
381	815325	149.2	117.32	181.09	16.27	0	0	0	0	0	0	0	0	0	0	0	0	0	0	0	0	0	0	0	0	0	0	0	0	0	0	0	0	0	0	0	0	0	0	0	0	0	0	0
382	817465	149.22	117.3	181.13	16.28	0	0	0	0	0	0	0	0	0	0	0	0	0	0	0	0	0	0	0	0	0	0	0	0	0	0	0	0	0	0	0	0	0	0	0	0	0	0	0
383	819605	149.23	117.29	181.17	16.3	0	0	0	0	0	0	0	0	0	0	0	0	0	0	0	0	0	0	0	0	0	0	0	0	0	0	0	0	0	0	0	0	0	0	0	0	0	0	0
384	821745	149.24	117.27	181.21	16.31	0	0	0	0	0	0	0	0	0	0	0	0	0	0	0	0	0	0	0	0	0	0	0	0	0	0	0	0	0	0	0	0	0	0	0	0	0	0	0
385	823885	149.25	117.26	181.25	16.32	0	0	0	0	0	0	0	0	0	0	0	0	0	0	0	0	0	0	0	0	0	0	0	0	0	0	0	0	0	0	0	0	0	0	0	0	0	0	0
386	826025	149.27	117.24	181.29	16.34	0	0	0	0	0	0	0	0	0	0	0	0	0	0	0	0	0	0	0	0	0	0	0	0	0	0	0	0	0	0	0	0	0	0	0	0	0	0	0
387	828165	149.28	117.23	181.33	16.35	0	0	0	0	0	0	0	0	0	0	0	0	0	0	0	0	0	0	0	0	0	0	0	0	0	0	0	0	0	0	0	0	0	0	0	0	0	0	0
388	830304	149.29	117.21	181.37	16.37	0	0	0	0	0	0	0	0	0	0	0	0	0	0	0	0	0	0	0	0	0	0	0	0	0	0	0	0	0	0	0	0	0	0	0	0	0	0	0
389	832444	149.3	117.2	181.41	16.38	0	0	0	0	0	0	0	0	0	0	0	0	0	0	0	0	0	0	0	0	0	0	0	0	0	0	0	0	0	0	0	0	0	0	0	0	0	0	0
390	834584	149.32	117.19	181.45	16.39	0	0	0	0	0	0	0	0	0	0	0	0	0	0	0	0	0	0	0	0	0	0	0	0	0	0	0	0	0	0	0	0	0	0	0	0	0	0	0
391	836724	149.33	117.17	181.48	16.41	0	0	0	0	0	0	0	0	0	0	0	0	0	0	0	0	0	0	0	0	0	0	0	0	0	0	0	0	0	0	0	0	0	0	0	0	0	0	0
392	838864	149.34	117.16	181.52	16.42	0	0	0	0	0	0	0	0	0	0	0	0	0	0	0	0	0	0	0	0	0	0	0	0	0	0	0	0	0	0	0	0	0	0	0	0	0	0	0
393	841004	149.35	117.14	181.56	16.43	0	0	0	0	0	0	0	0	0	0	0	0	0	0	0	0	0	0	0	0	0	0	0	0	0	0	0	0	0	0	0	0	0	0	0	0	0	0	0
394	843144	149.36	117.13	181.6	16.45	0	0	0	0	0	0	0	0	0	0	0	0	0	0	0	0	0	0	0	0	0	0	0	0	0	0	0	0	0	0	0	0	0	0	0	0	0	0	0
395	845284	149.38	117.12	181.63	16.46	0	0	0	0	0	0	0	0	0	0	0	0	0	0	0	0	0	0	0	0	0	0	0	0	0	0	0	0	0	0	0	0	0	0	0	0	0	0	0
396	847424	149.39	117.1	181.67	16.47	0	0	0	0	0	0	0	0	0	0	0	0	0	0	0	0	0	0	0	0	0	0	0	0	0	0	0	0	0	0	0	0	0	0	0	0	0	0	0
397	849564	149.4	117.09	181.71	16.48	0	0	0	0	0	0	0	0	0	0	0	0	0	0	0	0	0	0	0	0	0	0	0	0	0	0	0	0	0	0	0	0	0	0	0	0	0	0	0
398	851704	149.41	117.08	181.74	16.5	0	0	0	0	0	0	0	0	0	0	0	0	0	0	0	0	0	0	0	0	0	0	0	0	0	0	0	0	0	0	0	0	0	0	0	0	0	0	0
399	853844	149.42	117.06	181.78	16.51	0	0	0	0	0	0	0	0	0	0	0	0	0	0	0	0	0	0	0	0	0	0	0	0	0	0	0	0	0	0	0	0	0	0	0	0	0	0	0
400	855984	149.43	117.05	181.81	16.52	0	0	0	0	0	0	0	0	0	0	0	0	0	0	0	0	0	0	0	0	0	0	0	0	0	0	0	0	0	0	0	0	0	0	0	0	0	0	0
401	858124	149.44	117.04	181.85	16.53	0	0	0	0	0	0	0	0	0	0	0	0	0	0	0	0	0	0	0	0	0	0	0	0	0	0	0	0	0	0	0	0	0	0	0	0	0	0	0
402	860264	149.45	117.02	181.88	16.55	0	0	0	0	0	0	0	0	0	0	0	0	0	0	0	0	0	0	0	0	0	0	0	0	0	0	0	0	0	0	0	0	0	0	0	0	0	0	0
403	862404	149.46	117.01	181.92	16.56	0	0	0	0	0	0	0	0	0	0	0	0	0	0	0	0	0	0	0	0	0	0	0	0	0	0	0	0	0	0	0	0	0	0	0	0	0	0	0
404	864544	149.47	117	181.95	16.57	0	0	0	0	0	0	0	0	0	0	0	0	0	0	0	0	0	0	0	0	0	0	0	0	0	0	0	0	0	0	0	0	0	0	0	0	0	0	0
405	866684	149.48	116.98	181.98	16.58	0	0	0	0	0	0	0	0	0	0	0	0	0	0	0	0	0	0	0	0	0	0	0	0	0	0	0	0	0	0	0	0	0	0	0	0	0	0	0
406	868824	149.49	116.97	182.02	16.59	0	0	0	0	0	0	0	0	0	0	0	0	0	0	0	0	0	0	0	0	0	0	0	0	0	0	0	0	0	0	0	0	0	0	0	0	0	0	0
407	870964	149.5	116.96	182.05	16.6	0	0	0	0	0	0	0	0	0	0	0	0	0	0	0	0	0	0	0	0	0	0	0	0	0	0	0	0	0	0	0	0	0	0	0	0	0	0	0
408	873104	149.51	116.94	182.08	16.62	0	0	0	0	0	0	0	0	0	0	0	0	0	0	0	0	0	0	0	0	0	0	0	0	0	0	0	0	0	0	0	0	0	0	0	0	0	0	0
409	875244	149.52	116.93	182.11	16.63	0	0	0	0	0	0	0	0	0	0	0	0	0	0	0	0	0	0	0	0	0	0	0	0	0	0	0	0	0	0	0	0	0	0	0	0	0	0	0
410	877384	149.53	116.92	182.14	16.64	0	0	0	0	0	0	0	0	0	0	0	0	0	0	0	0	0	0	0	0	0	0	0	0	0	0	0	0	0	0	0	0	0	0	0	0	0	0	0
411	879524	149.54	116.91	182.18	16.65	0	0	0	0	0	0	0	0	0	0	0	0	0	0	0	0	0	0	0	0	0	0	0	0	0	0	0	0	0	0	0	0	0	0	0	0	0	0	0
412	881664	149.55	116.89	182.21	16.66	0	0	0	0	0	0	0	0	0	0	0	0	0	0	0	0	0	0	0	0	0	0	0	0	0	0	0	0	0	0	0	0	0	0	0	0	0	0	0
413	883803	149.56	116.88	182.24	16.67	0	0	0	0	0	0	0	0	0	0	0	0	0	0	0	0	0	0	0	0	0	0	0	0	0	0	0	0	0	0	0	0	0	0	0	0	0	0	0
414	885943	149.57	116.87	182.27	16.68	0	0	0	0	0	0	0	0	0	0	0	0	0	0	0	0	0	0	0	0	0	0	0	0	0	0	0	0	0	0	0	0	0	0	0	0	0	0	0
415	888083	149.58	116.86	182.3	16.69	0	0	0	0	0	0	0	0	0	0	0	0	0	0	0	0	0	0	0	0	0	0	0	0	0	0	0	0	0	0	0	0	0	0	0	0	0	0	0
416	890223	149.59	116.85	182.33	16.7	0	0	0	0	0	0	0	0	0	0	0	0	0	0	0	0	0	0	0	0	0	0	0	0	0	0	0	0	0	0	0	0	0	0	0	0	0	0	0
417	892363	149.6	116.83	182.36	16.72	0	0	0	0	0	0	0	0	0	0	0	0	0	0	0	0	0	0	0	0	0	0	0	0	0	0	0	0	0	0	0	0	0	0	0	0	0	0	0
418	894503	149.61	116.82	182.39	16.73	0	0	0	0	0	0	0	0	0	0	0	0	0	0	0	0	0	0	0	0	0	0	0	0	0	0	0	0	0	0	0	0	0	0	0	0	0	0	0
419	896643	149.61	116.81	182.42	16.74	0	0	0	0	0	0	0	0	0	0	0	0	0	0	0	0	0	0	0	0	0	0	0	0	0	0	0	0	0	0	0	0	0	0	0	0	0	0	0
420	898783	149.62	116.8	182.45	16.75	0	0	0	0	0	0	0	0	0	0	0	0	0	0	0	0	0	0	0	0	0	0	0	0	0	0	0	0	0	0	0	0	0	0	0	0	0	0	0
421	900923	149.63	116.79	182.48	16.76	0	0	0	0	0	0	0	0	0	0	0	0	0	0	0	0	0	0	0	0	0	0	0	0	0	0	0	0	0	0	0	0	0	0	0	0	0	0	0
422	903063	149.64	116.78	182.5	16.77	0	0	0	0	0	0	0	0	0	0	0	0	0	0	0	0	0	0	0	0	0	0	0	0	0	0	0	0	0	0	0	0	0	0	0	0	0	0	0
423	905203	149.65	116.76	182.53	16.78	0	0	0	0	0	0	0	0	0	0	0	0	0	0	0	0	0	0	0	0	0	0	0	0	0	0	0	0	0	0	0	0	0	0	0	0	0	0	0
424	907343	149.66	116.75	182.56	16.79	0	0	0	0	0	0	0	0	0	0	0	0	0	0	0	0	0	0	0	0	0	0	0	0	0	0	0	0	0	0	0	0	0	0	0	0	0	0	0
425	909483	149.66	116.74	182.59	16.8	0	0	0	0	0	0	0	0	0	0	0	0	0	0	0	0	0	0	0	0	0	0	0	0	0	0	0	0	0	0	0	0	0	0	0	0	0	0	0
426	911623	149.67	116.73	182.62	16.81	0	0	0	0	0	0	0	0	0	0	0	0	0	0	0	0	0	0	0	0	0	0	0	0	0	0	0	0	0	0	0	0	0	0	0	0	0	0	0
427	913763	149.68	116.72	182.64	16.82	0	0	0	0	0	0	0	0	0	0	0	0	0	0	0	0	0	0	0	0	0	0	0	0	0	0	0	0	0	0	0	0	0	0	0	0	0	0	0
428	915903	149.69	116.71	182.67	16.83	0	0	0	0	0	0	0	0	0	0	0	0	0	0	0	0	0	0	0	0	0	0	0	0	0	0	0	0	0	0	0	0	0	0	0	0	0	0	0
429	918043	149.7	116.7	182.7	16.84	0	0	0	0	0	0	0	0	0	0	0	0	0	0	0	0	0	0	0	0	0	0	0	0	0	0	0	0	0	0	0	0	0	0	0	0	0	0	0
430	920183	149.7	116.69	182.72	16.85	0	0	0	0	0	0	0	0	0	0	0	0	0	0	0	0	0	0	0	0	0	0	0	0	0	0	0	0	0	0	0	0	0	0	0	0	0	0	0
431	922323	149.71	116.67	182.75	16.86	0	0	0	0	0	0	0	0	0	0	0	0	0	0	0	0	0	0	0	0	0	0	0	0	0	0	0	0	0	0	0	0	0	0	0	0	0	0	0
432	924463	149.72	116.66	182.77	16.86	0	0	0	0	0	0	0	0	0	0	0	0	0	0	0	0	0	0	0	0	0	0	0	0	0	0	0	0	0	0	0	0	0	0	0	0	0	0	0
433	926603	149.73	116.65	182.8	16.87	0	0	0	0	0	0	0	0	0	0	0	0	0	0	0	0	0	0	0	0	0	0	0	0	0	0	0	0	0	0	0	0	0	0	0	0	0	0	0
434	928743	149.73	116.64	182.83	16.88	0	0	0	0	0	0	0	0	0	0	0	0	0	0	0	0	0	0	0	0	0	0	0	0	0	0	0	0	0	0	0	0	0	0	0	0	0	0	0
435	930883	149.74	116.63	182.85	16.89	0	0	0	0	0	0	0	0	0	0	0	0	0	0	0	0	0	0	0	0	0	0	0	0	0	0	0	0	0	0	0	0	0	0	0	0	0	0	0
436	933023	149.75	116.62	182.88	16.9	0	0	0	0	0	0	0	0	0	0	0	0	0	0	0	0	0	0	0	0	0	0	0	0	0	0	0	0	0	0	0	0	0	0	0	0	0	0	0
437	935163	149.76	116.61	182.9	16.91	0	0	0	0	0	0	0	0	0	0	0	0	0	0	0	0	0	0	0	0	0	0	0	0	0	0	0	0	0	0	0	0	0	0	0	0	0	0	0
438	937302	149.76	116.6	182.92	16.92	0	0	0	0	0	0	0	0	0	0	0	0	0	0	0	0	0	0	0	0	0	0	0	0	0	0	0	0	0	0	0	0	0	0	0	0	0	0	0
439	939442	149.77	116.59	182.95	16.93	0	0	0	0	0	0	0	0	0	0	0	0	0	0	0	0	0	0	0	0	0	0	0	0	0	0	0	0	0	0	0	0	0	0	0	0	0	0	0
440	941582	149.78	116.58	182.97	16.94	0	0	0	0	0	0	0	0	0	0	0	0	0	0	0	0	0	0	0	0	0	0	0	0	0	0	0	0	0	0	0	0	0	0	0	0	0	0	0
441	943722	149.78	116.57	183	16.95	0	0	0	0	0	0	0	0	0	0	0	0	0	0	0	0	0	0	0	0	0	0	0	0	0	0	0	0	0	0	0	0	0	0	0	0	0	0	0
442	945862	149.79	116.56	183.02	16.95	0	0	0	0	0	0	0	0	0	0	0	0	0	0	0	0	0	0	0	0	0	0	0	0	0	0	0	0	0	0	0	0	0	0	0	0	0	0	0
443	948002	149.8	116.55	183.04	16.96	0	0	0	0	0	0	0	0	0	0	0	0	0	0	0	0	0	0	0	0	0	0	0	0	0	0	0	0	0	0	0	0	0	0	0	0	0	0	0
444	950142	149.8	116.54	183.07	16.97	0	0	0	0	0	0	0	0	0	0	0	0	0	0	0	0	0	0	0	0	0	0	0	0	0	0	0	0	0	0	0	0	0	0	0	0	0	0	0
445	952282	149.81	116.53	183.09	16.98	0	0	0	0	0	0	0	0	0	0	0	0	0	0	0	0	0	0	0	0	0	0	0	0	0	0	0	0	0	0	0	0	0	0	0	0	0	0	0
446	954422	149.82	116.52	183.11	16.99	0	0	0	0	0	0	0	0	0	0	0	0	0	0	0	0	0	0	0	0	0	0	0	0	0	0	0	0	0	0	0	0	0	0	0	0	0	0	0
447	956562	149.82	116.51	183.13	17	0	0	0	0	0	0	0	0	0	0	0	0	0	0	0	0	0	0	0	0	0	0	0	0	0	0	0	0	0	0	0	0	0	0	0	0	0	0	0
448	958702	149.83	116.5	183.16	17	0	0	0	0	0	0	0	0	0	0	0	0	0	0	0	0	0	0	0	0	0	0	0	0	0	0	0	0	0	0	0	0	0	0	0	0	0	0	0
449	960842	149.83	116.49	183.18	17.01	0	0	0	0	0	0	0	0	0	0	0	0	0	0	0	0	0	0	0	0	0	0	0	0	0	0	0	0	0	0	0	0	0	0	0	0	0	0	0
450	962982	149.84	116.48	183.2	17.02	0	0	0	0	0	0	0	0	0	0	0	0	0	0	0	0	0	0	0	0	0	0	0	0	0	0	0	0	0	0	0	0	0	0	0	0	0	0	0
451	965122	149.85	116.47	183.22	17.03	0	0	0	0	0	0	0	0	0	0	0	0	0	0	0	0	0	0	0	0	0	0	0	0	0	0	0	0	0	0	0	0	0	0	0	0	0	0	0
452	967262	149.85	116.46	183.24	17.04	0	0	0	0	0	0	0	0	0	0	0	0	0	0	0	0	0	0	0	0	0	0	0	0	0	0	0	0	0	0	0	0	0	0	0	0	0	0	0
453	969402	149.86	116.45	183.26	17.04	0	0	0	0	0	0	0	0	0	0	0	0	0	0	0	0	0	0	0	0	0	0	0	0	0	0	0	0	0	0	0	0	0	0	0	0	0	0	0
454	971542	149.86	116.44	183.28	17.05	0	0	0	0	0	0	0	0	0	0	0	0	0	0	0	0	0	0	0	0	0	0	0	0	0	0	0	0	0	0	0	0	0	0	0	0	0	0	0
455	973682	149.87	116.44	183.31	17.06	0	0	0	0	0	0	0	0	0	0	0	0	0	0	0	0	0	0	0	0	0	0	0	0	0	0	0	0	0	0	0	0	0	0	0	0	0	0	0
456	975822	149.88	116.43	183.33	17.07	0	0	0	0	0	0	0	0	0	0	0	0	0	0	0	0	0	0	0	0	0	0	0	0	0	0	0	0	0	0	0	0	0	0	0	0	0	0	0
457	977962	149.88	116.42	183.35	17.07	0	0	0	0	0	0	0	0	0	0	0	0	0	0	0	0	0	0	0	0	0	0	0	0	0	0	0	0	0	0	0	0	0	0	0	0	0	0	0
458	980102	149.89	116.41	183.37	17.08	0	0	0	0	0	0	0	0	0	0	0	0	0	0	0	0	0	0	0	0	0	0	0	0	0	0	0	0	0	0	0	0	0	0	0	0	0	0	0
459	982242	149.89	116.4	183.39	17.09	0	0	0	0	0	0	0	0	0	0	0	0	0	0	0	0	0	0	0	0	0	0	0	0	0	0	0	0	0	0	0	0	0	0	0	0	0	0	0
460	984382	149.9	116.39	183.41	17.1	0	0	0	0	0	0	0	0	0	0	0	0	0	0	0	0	0	0	0	0	0	0	0	0	0	0	0	0	0	0	0	0	0	0	0	0	0	0	0
461	986522	149.9	116.38	183.43	17.1	0	0	0	0	0	0	0	0	0	0	0	0	0	0	0	0	0	0	0	0	0	0	0	0	0	0	0	0	0	0	0	0	0	0	0	0	0	0	0
462	988662	149.91	116.37	183.45	17.11	0	0	0	0	0	0	0	0	0	0	0	0	0	0	0	0	0	0	0	0	0	0	0	0	0	0	0	0	0	0	0	0	0	0	0	0	0	0	0
463	990801	149.91	116.36	183.46	17.12	0	0	0	0	0	0	0	0	0	0	0	0	0	0	0	0	0	0	0	0	0	0	0	0	0	0	0	0	0	0	0	0	0	0	0	0	0	0	0
464	992941	149.92	116.36	183.48	17.12	0	0	0	0	0	0	0	0	0	0	0	0	0	0	0	0	0	0	0	0	0	0	0	0	0	0	0	0	0	0	0	0	0	0	0	0	0	0	0
465	995081	149.92	116.35	183.5	17.13	0	0	0	0	0	0	0	0	0	0	0	0	0	0	0	0	0	0	0	0	0	0	0	0	0	0	0	0	0	0	0	0	0	0	0	0	0	0	0
466	997221	149.93	116.34	183.52	17.14	0	0	0	0	0	0	0	0	0	0	0	0	0	0	0	0	0	0	0	0	0	0	0	0	0	0	0	0	0	0	0	0	0	0	0	0	0	0	0
467	999361	149.93	116.33	183.54	17.15	0	0	0	0	0	0	0	0	0	0	0	0	0	0	0	0	0	0	0	0	0	0	0	0	0	0	0	0	0	0	0	0	0	0	0	0	0	0	0
468	1.0015e+06	149.94	116.32	183.56	17.15	0	0	0	0	0	0	0	0	0	0	0	0	0	0	0	0	0	0	0	0	0	0	0	0	0	0	0	0	0	0	0	0	0	0	0	0	0	0	0
469	1.00364e+06	149.94	116.31	183.58	17.16	0	0	0	0	0	0	0	0	0	0	0	0	0	0	0	0	0	0	0	0	0	0	0	0	0	0	0	0	0	0	0	0	0	0	0	0	0	0	0
470	1.00578e+06	149.95	116.31	183.59	17.17	0	0	0	0	0	0	0	0	0	0	0	0	0	0	0	0	0	0	0	0	0	0	0	0	0	0	0	0	0	0	0	0	0	0	0	0	0	0	0
471	1.00792e+06	149.95	116.3	183.61	17.17	0	0	0	0	0	0	0	0	0	0	0	0	0	0	0	0	0	0	0	0	0	0	0	0	0	0	0	0	0	0	0	0	0	0	0	0	0	0	0
472	1.01006e+06	149.96	116.29	183.63	17.18	0	0	0	0	0	0	0	0	0	0	0	0	0	0	0	0	0	0	0	0	0	0	0	0	0	0	0	0	0	0	0	0	0	0	0	0	0	0	0
473	1.0122e+06	149.96	116.28	183.65	17.19	0	0	0	0	0	0	0	0	0	0	0	0	0	0	0	0	0	0	0	0	0	0	0	0	0	0	0	0	0	0	0	0	0	0	0	0	0	0	0
474	1.01434e+06	149.97	116.27	183.66	17.19	0	0	0	0	0	0	0	0	0	0	0	0	0	0	0	0	0	0	0	0	0	0	0	0	0	0	0	0	0	0	0	0	0	0	0	0	0	0	0
475	1016481	149.97	116.27	183.68	17.2	0	0	0	0	0	0	0	0	0	0	0	0	0	0	0	0	0	0	0	0	0	0	0	0	0	0	0	0	0	0	0	0	0	0	0	0	0	0	0
476	1.01862e+06	149.98	116.26	183.7	17.2	0	0	0	0	0	0	0	0	0	0	0	0	0	0	0	0	0	0	0	0	0	0	0	0	0	0	0	0	0	0	0	0	0	0	0	0	0	0	0
477	1.02076e+06	149.98	116.25	183.71	17.21	0	0	0	0	0	0	0	0	0	0	0	0	0	0	0	0	0	0	0	0	0	0	0	0	0	0	0	0	0	0	0	0	0	0	0	0	0	0	0
478	1.0229e+06	149.99	116.24	183.73	17.22	0	0	0	0	0	0	0	0	0	0	0	0	0	0	0	0	0	0	0	0	0	0	0	0	0	0	0	0	0	0	0	0	0	0	0	0	0	0	0
479	1.02504e+06	149.99	116.23	183.75	17.22	0	0	0	0	0	0	0	0	0	0	0	0	0	0	0	0	0	0	0	0	0	0	0	0	0	0	0	0	0	0	0	0	0	0	0	0	0	0	0
480	1.02718e+06	150	116.23	183.76	17.23	0	0	0	0	0	0	0	0	0	0	0	0	0	0	0	0	0	0	0	0	0	0	0	0	0	0	0	0	0	0	0	0	0	0	0	0	0	0	0
481	1.02932e+06	150	116.22	183.78	17.23	0	0	0	0	0	0	0	0	0	0	0	0	0	0	0	0	0	0	0	0	0	0	0	0	0	0	0	0	0	0	0	0	0	0	0	0	0	0	0
482	1.03146e+06	150	116.21	183.8	17.24	0	0	0	0	0	0	0	0	0	0	0	0	0	0	0	0	0	0	0	0	0	0	0	0	0	0	0	0	0	0	0	0	0	0	0	0	0	0	0
483	1.0336e+06	150.01	116.2	183.81	17.25	0	0	0	0	0	0	0	0	0	0	0	0	0	0	0	0	0	0	0	0	0	0	0	0	0	0	0	0	0	0	0	0	0	0	0	0	0	0	0
484	1.03574e+06	150.01	116.2	183.83	17.25	0	0	0	0	0	0	0	0	0	0	0	0	0	0	0	0	0	0	0	0	0	0	0	0	0	0	0	0	0	0	0	0	0	0	0	0	0	0	0
485	1.03788e+06	150.02	116.19	183.84	17.26	0	0	0	0	0	0	0	0	0	0	0	0	0	0	0	0	0	0	0	0	0	0	0	0	0	0	0	0	0	0	0	0	0	0	0	0	0	0	0
486	1.04002e+06	150.02	116.18	183.86	17.26	0	0	0	0	0	0	0	0	0	0	0	0	0	0	0	0	0	0	0	0	0	0	0	0	0	0	0	0	0	0	0	0	0	0	0	0	0	0	0
487	1.04216e+06	150.02	116.18	183.87	17.27	0	0	0	0	0	0	0	0	0	0	0	0	0	0	0	0	0	0	0	0	0	0	0	0	0	0	0	0	0	0	0	0	0	0	0	0	0	0	0
488	1.0443e+06	150.03	116.17	183.89	17.28	0	0	0	0	0	0	0	0	0	0	0	0	0	0	0	0	0	0	0	0	0	0	0	0	0	0	0	0	0	0	0	0	0	0	0	0	0	0	0
489	1.04644e+06	150.03	116.16	183.9	17.28	0	0	0	0	0	0	0	0	0	0	0	0	0	0	0	0	0	0	0	0	0	0	0	0	0	0	0	0	0	0	0	0	0	0	0	0	0	0	0
490	1.04858e+06	150.04	116.15	183.92	17.29	0	0	0	0	0	0	0	0	0	0	0	0	0	0	0	0	0	0	0	0	0	0	0	0	0	0	0	0	0	0	0	0	0	0	0	0	0	0	0
491	1.05072e+06	150.04	116.15	183.93	17.29	0	0	0	0	0	0	0	0	0	0	0	0	0	0	0	0	0	0	0	0	0	0	0	0	0	0	0	0	0	0	0	0	0	0	0	0	0	0	0
492	1.05286e+06	150.04	116.14	183.95	17.3	0	0	0	0	0	0	0	0	0	0	0	0	0	0	0	0	0	0	0	0	0	0	0	0	0	0	0	0	0	0	0	0	0	0	0	0	0	0	0
493	1.055e+06	150.05	116.13	183.96	17.3	0	0	0	0	0	0	0	0	0	0	0	0	0	0	0	0	0	0	0	0	0	0	0	0	0	0	0	0	0	0	0	0	0	0	0	0	0	0	0
494	1.05714e+06	150.05	116.13	183.98	17.31	0	0	0	0	0	0	0	0	0	0	0	0	0	0	0	0	0	0	0	0	0	0	0	0	0	0	0	0	0	0	0	0	0	0	0	0	0	0	0
495	1.05928e+06	150.05	116.12	183.99	17.31	0	0	0	0	0	0	0	0	0	0	0	0	0	0	0	0	0	0	0	0	0	0	0	0	0	0	0	0	0	0	0	0	0	0	0	0	0	0	0
496	1.06142e+06	150.06	116.11	184	17.32	0	0	0	0	0	0	0	0	0	0	0	0	0	0	0	0	0	0	0	0	0	0	0	0	0	0	0	0	0	0	0	0	0	0	0	0	0	0	0
497	1.06356e+06	150.06	116.11	184.02	17.32	0	0	0	0	0	0	0	0	0	0	0	0	0	0	0	0	0	0	0	0	0	0	0	0	0	0	0	0	0	0	0	0	0	0	0	0	0	0	0
498	1.0657e+06	150.07	116.1	184.03	17.33	0	0	0	0	0	0	0	0	0	0	0	0	0	0	0	0	0	0	0	0	0	0	0	0	0	0	0	0	0	0	0	0	0	0	0	0	0	0	0
499	1.06784e+06	150.07	116.09	184.05	17.33	0	0	0	0	0	0	0	0	0	0	0	0	0	0	0	0	0	0	0	0	0	0	0	0	0	0	0	0	0	0	0	0	0	0	0	0	0	0	0
500	1069980	150.07	116.09	184.06	17.34	0	0	0	0	0	0	0	0	0	0	0	0	0	0	0	0	0	0	0	0	0	0	0	0	0	0	0	0	0	0	0	0	0	0	0	0	0	0	0

## Sheet: Zooplankon dimictic
EstimateS (Version 9.1.0), Copyright R. K. Colwell: http://purl.oclc.org/estimates
Diversity Output from Input File: DIMI (11, sierpieÄ 2017, )
Reference Sample = 110
Samples	Individuals (computed)	S(est)	S(est) 95% CI Lower Bound	S(est) 95% CI Upper Bound	S(est) SD	S Mean (runs)	Singletons Mean	Singletons SD (runs)	Doubletons Mean	Doubletons SD (runs)	Uniques Mean	Uniques SD (runs)	Duplicates Mean	Duplicates SD (runs)	ACE Mean	ACE SD (runs)	ICE Mean	ICE SD (runs)	Chao 1 Mean	Chao 1 95% CI Lower Bound	Chao 1 95% CI Upper Bound	Chao 1 SD (analytical)	Chao 2 Mean	Chao 2 95% CI Lower Bound	Chao 2 95% CI Upper Bound	Chao 2 SD (analytical)	Jack 1 Mean	Jack 1 SD (analytical)	Jack 2 Mean	Jack 2 SD (runs)	Bootstrap Mean	Bootstrap SD (runs)	MMRuns Mean	MMMeans (1 run)	Cole Rarefaction	Cole SD (analytical)	Alpha Mean	Alpha SD (analytical)	Shannon Mean	Shannon SD (runs)	Shannon Exponential Mean	Shannon Exponential SD (runs)	Simpson Inv Mean	Simpson Inv SD (runs)
1	361.05	18.35	13.12	23.57	2.66	18.2	7.3	4.22	2.46	1.74	18.2	4.23	0	0	36.38	23.38	18.2	4.23	32.5	22.23	73.1	10.93	18.2	28.79	28.79	0	18.2	0	0	0	18.2	4.23	0	0	35.77	2.55	298.04	8819.01	1.87	0.46	7.16	2.98	4.71	2.24
2	722.11	27.35	20.41	34.29	3.54	27.3	8.66	3.74	3.36	1.83	17.9	4.21	9.4	3.29	38.5	10.97	83.8	51.81	38.52	30.18	73.33	9.16	36.73	30.24	58.01	6.21	36.25	2.52	36.25	5.98	31.78	5.1	79.3	53.71	42.31	2.52	6.66	0.71	2.13	0.39	9.04	3.29	5.73	2.49
3	1083.16	33.05	25.26	40.83	3.97	33.26	9.38	3.71	3.65	1.98	17.26	4.69	9.9	2.62	44.78	11.1	59.59	19.8	46	36.67	82.88	9.92	43.37	36.51	65.32	6.47	44.77	3.31	48.87	8.47	38.74	5.49	68.64	54.91	46.03	2.58	7.14	0.61	2.25	0.33	10.05	3.3	6.25	2.56
4	1444.22	37.15	28.87	45.43	4.22	37.72	9.98	3.6	3.67	2.01	16.97	4.74	9.35	2.8	49.53	10.4	57.99	14.45	51.62	41.35	92.25	10.94	49.19	41.4	74.1	7.35	50.45	3.89	55.82	9.72	43.7	5.76	65.68	55.97	48.73	2.67	7.54	0.57	2.32	0.33	10.72	3.36	6.55	2.55
5	1805.27	40.35	31.75	48.95	4.39	41.05	10.38	3.82	3.8	1.96	16.94	4.45	8.92	2.73	53.29	10.86	58.91	12.19	55.06	44.78	95.05	10.84	53.55	45.04	80.79	8.03	54.6	4.29	60.75	10.5	47.37	6.31	65.42	56.95	50.93	2.76	7.85	0.55	2.36	0.32	11.11	3.42	6.68	2.58
6	2166.33	42.98	34.17	51.8	4.5	43.75	10.76	3.91	3.77	1.97	16.97	4.45	8.27	2.78	56.59	11.8	60.8	11.59	59.61	48.08	103.54	12.01	58.3	48.39	89.98	9.35	57.89	4.41	64.79	10.92	50.27	6.26	135.28	57.87	52.84	2.83	8.14	0.54	2.41	0.28	11.58	3.21	6.83	2.43
7	2527.38	45.23	36.27	54.19	4.57	45.68	11.03	3.92	3.69	2.02	16.44	4.1	8.16	2.59	59.65	12.18	61.37	10.44	63.23	50.73	109.25	12.75	59.61	50.05	90.67	9.1	59.77	4.45	66.66	10.59	52.18	6.14	64.89	58.73	54.53	2.89	8.26	0.53	2.44	0.28	11.89	3.21	6.98	2.44
8	2888.44	47.2	38.14	56.27	4.63	48.17	11.53	4.09	3.8	2.03	16.82	4.46	7.74	2.65	63.4	13.18	64.27	11.15	66.29	53.19	114.98	13.46	64.45	53.34	100.07	10.5	62.89	4.49	70.53	11.73	54.89	6.55	64.39	59.55	56.08	2.95	8.52	0.52	2.47	0.27	12.28	3.2	7.12	2.43
9	3249.49	48.97	39.83	58.11	4.66	49.61	11.76	4.19	3.72	1.9	16.67	4.55	7.29	2.8	65.68	14.46	65.38	11.56	68.22	54.85	117.24	13.63	67.04	55.12	105.51	11.31	64.43	4.63	72.43	12.52	56.33	7.03	64.38	60.33	57.5	2.99	8.61	0.51	2.5	0.25	12.59	3.17	7.29	2.49
10	3610.55	50.58	41.38	59.77	4.69	51.24	12.12	4.31	3.82	1.94	16.85	4.51	7.1	2.36	68.27	15.42	67.29	11.58	70.75	56.77	121.6	14.19	68.73	56.82	106.76	11.23	66.41	4.82	74.84	12.63	58.08	7.07	64.6	61.08	58.83	3.03	8.74	0.5	2.52	0.24	12.76	3.04	7.34	2.42
11	3971.6	52.06	42.83	61.29	4.71	52.82	12.48	4.19	3.89	1.97	17.16	4.34	6.95	2.51	70.5	14.99	69.1	11	73.02	58.46	126.37	14.84	71.38	58.76	111.41	11.85	68.42	4.99	77.34	12.09	59.8	6.73	64.93	61.81	60.06	3.06	8.83	0.49	2.53	0.22	12.85	2.77	7.32	2.12
12	4332.65	53.44	44.18	62.71	4.73	54.18	12.9	4.08	3.73	1.84	17.44	4.32	6.62	2.36	72.8	15.55	70.68	11.09	75.89	60.44	131.07	15.51	74.6	60.72	118.53	13.02	70.17	4.99	79.68	12.24	61.27	6.81	65.31	62.51	61.23	3.08	8.94	0.49	2.55	0.2	13.11	2.67	7.41	2.01
13	4693.71	54.74	45.46	64.03	4.74	55.54	13.23	4.23	3.82	1.81	17.72	4.48	6.49	2.2	75.34	16.31	72.38	11.41	77.19	61.83	131.65	15.36	77.01	62.47	122.74	13.59	71.9	5.14	81.86	12.88	62.75	6.97	65.78	63.19	62.33	3.1	9.04	0.48	2.57	0.21	13.35	2.76	7.55	2.04
14	5054.76	55.98	46.67	65.28	4.75	56.82	13.59	4.21	3.99	1.94	18	4.47	6.36	2.32	77.21	15.69	74.17	11.43	78.29	62.98	132.9	15.37	79.6	64.18	128.03	14.41	73.53	5.13	83.93	12.66	64.15	6.79	66.28	63.85	63.37	3.12	9.13	0.48	2.58	0.2	13.51	2.64	7.63	2.04
15	5415.82	57.15	47.83	66.46	4.75	57.9	13.83	4.29	4.24	2.01	18.23	4.64	6.41	2.36	78.93	16.35	75.78	11.83	79.66	64.23	133.85	15.35	82.66	65.92	135.1	15.62	74.91	5.17	85.56	13.2	65.33	6.83	66.78	64.5	64.36	3.14	9.2	0.48	2.6	0.19	13.69	2.67	7.72	2.09
16	5776.87	58.27	48.95	67.6	4.76	58.67	14	4.13	4.36	1.99	18.27	4.38	6.38	2.23	80.47	16.33	76.72	11.36	79.62	64.74	132.09	14.84	82.28	66.35	131.9	14.82	75.8	5.25	86.57	12.52	66.14	6.48	67.23	65.13	65.3	3.15	9.23	0.47	2.61	0.19	13.82	2.61	7.79	2.03
17	6137.93	59.35	50.01	68.68	4.76	59.83	14.37	3.97	4.45	2.21	18.52	4.3	6.47	2.36	82.19	15.63	78.31	11.4	81.79	66.2	136.55	15.52	83.59	67.61	132.97	14.8	77.26	5.24	88.25	12.49	67.41	6.6	67.7	65.75	66.21	3.17	9.34	0.47	2.62	0.19	14.01	2.72	7.9	2.12
18	6498.98	60.38	51.04	69.73	4.77	60.69	14.5	3.95	4.52	2.29	18.66	4.23	6.46	2.33	82.98	15.14	79.46	11.44	82.84	67.13	137.82	15.6	84.69	68.56	134.56	14.94	78.31	5.23	89.5	12.4	68.35	6.69	68.15	66.35	67.07	3.18	9.39	0.47	2.63	0.19	14.13	2.78	7.98	2.16
19	6860.04	61.39	52.04	70.74	4.77	61.65	14.89	3.93	4.64	2.31	18.98	4.24	6.51	2.43	85.2	15.71	81.12	11.6	85.51	68.77	142.72	16.4	87.28	70.07	140.24	15.9	79.63	5.24	91.11	12.45	69.43	6.57	68.61	66.95	67.9	3.19	9.46	0.46	2.64	0.19	14.28	2.72	8.05	2.16
20	7221.09	62.36	53	71.71	4.77	62.67	15.3	3.97	4.54	2.12	19.36	4.09	6.43	2.5	87.36	16.24	82.96	11.34	88.2	70.47	147.52	17.16	90.25	71.74	147.1	17.08	81.06	5.3	93	12	70.6	6.28	69.08	67.53	68.71	3.2	9.53	0.46	2.65	0.18	14.42	2.64	8.1	2.11
21	7582.15	63.29	53.93	72.66	4.78	63.65	15.59	3.92	4.67	2.1	19.71	4	6.43	2.35	88.89	15.33	84.63	11.14	89.68	71.69	149.25	17.31	91.76	72.96	148.99	17.26	82.42	5.32	94.73	11.73	71.71	6.06	69.56	68.1	69.48	3.2	9.61	0.46	2.66	0.18	14.45	2.55	8.07	1.98
22	7943.2	64.21	54.84	73.57	4.78	64.57	15.79	3.91	4.86	2.13	19.95	3.93	6.57	2.38	90.35	15.53	86.05	11.07	91.2	73.02	150.29	17.3	93.39	74.13	151.95	17.68	83.61	5.31	96.06	11.41	72.75	5.95	70.05	68.66	70.22	3.21	9.69	0.46	2.66	0.17	14.45	2.4	8	1.85
23	8304.25	65.09	55.72	74.46	4.78	65.19	15.89	3.81	4.98	2.18	20.07	3.85	6.66	2.45	90.99	15.15	87.07	10.98	90.13	72.72	148.63	16.9	93.75	74.71	151.31	17.42	84.39	5.36	96.91	11.09	73.43	5.84	70.49	69.21	70.94	3.22	9.71	0.45	2.66	0.16	14.48	2.27	7.96	1.73
24	8665.31	65.95	56.57	75.33	4.79	66.09	16.18	3.85	5.19	2.29	20.37	3.87	6.91	2.55	92.41	15.15	88.76	10.95	91.71	73.93	150.54	17.11	94.79	75.73	151.93	17.35	85.61	5.4	98.22	11.18	74.47	5.71	70.95	69.75	71.64	3.22	9.81	0.45	2.67	0.16	14.59	2.26	8.04	1.68
25	9026.36	66.79	57.41	76.18	4.79	66.84	16.46	3.79	5.29	2.27	20.7	3.84	7.06	2.51	93.64	14.41	90.48	11.2	92.97	74.89	152.36	17.33	96.12	76.72	154.08	17.63	86.71	5.41	99.53	11.13	75.37	5.83	71.41	70.28	72.32	3.23	9.86	0.45	2.67	0.15	14.61	2.21	8.04	1.6
26	9387.42	67.61	58.22	77	4.79	67.6	16.78	3.81	5.31	2.17	21	3.95	7.1	2.43	95.34	14.78	92.13	11.75	93.57	75.62	152.32	17.17	97.28	77.71	155.17	17.69	87.79	5.43	100.89	11.43	76.25	5.81	71.85	70.81	72.98	3.23	9.92	0.45	2.68	0.15	14.7	2.22	8.09	1.61
27	9748.47	68.41	59.01	77.81	4.79	68.42	17.12	3.93	5.38	2.03	21.42	3.98	7.2	2.27	96.96	15.85	94.1	12.12	94.53	76.59	152.44	17.03	98.18	78.68	155.07	17.49	89.05	5.47	102.47	11.67	77.24	5.96	72.3	71.32	73.62	3.23	10	0.45	2.68	0.15	14.75	2.17	8.09	1.58
28	10109.5	69.19	59.78	78.59	4.8	69.12	17.28	3.95	5.46	2.02	21.57	4.04	7.36	2.2	98.1	16.39	95.41	12.46	95.11	77.3	152.34	16.86	98.53	79.32	154.33	17.19	89.92	5.49	103.37	11.77	78.03	5.98	72.74	71.83	74.24	3.24	10.04	0.45	2.68	0.15	14.81	2.19	8.14	1.59
29	10470.6	69.95	60.54	79.36	4.8	69.95	17.58	4	5.58	1.95	21.89	4.05	7.59	2.22	99.85	16.57	97.17	12.56	96.47	78.36	154.14	17.06	99.77	80.34	155.94	17.34	91.09	5.56	104.65	11.83	79	6.02	73.19	72.32	74.85	3.24	10.12	0.45	2.68	0.15	14.81	2.17	8.11	1.59
30	10831.6	70.69	61.28	80.11	4.8	70.64	17.85	4.14	5.57	2.08	22.14	4.26	7.62	2.29	101.15	16.99	98.75	13.29	99.31	79.77	161.28	18.36	102.16	81.66	161.16	18.25	92.04	5.6	105.84	12.51	79.8	6.03	73.63	72.81	75.44	3.24	10.18	0.45	2.69	0.14	14.88	2.11	8.11	1.54
31	11192.7	71.42	62	80.84	4.81	71.23	18.16	4.19	5.49	2.02	22.35	4.33	7.64	2.29	102.67	17.59	100.26	13.57	100.89	80.73	164.44	18.88	103.11	82.42	162.41	18.37	92.86	5.64	106.86	12.71	80.48	5.98	74.05	73.29	76.02	3.24	10.22	0.45	2.69	0.14	14.89	2.05	8.11	1.49
32	11553.8	72.13	62.7	81.56	4.81	72.1	18.47	4.13	5.65	2.16	22.77	4.35	7.83	2.45	104.02	16.94	102.65	14.07	102.26	81.8	166.5	19.12	103.97	83.41	162.24	18.14	94.16	5.69	108.4	12.62	81.53	5.86	74.48	73.77	76.58	3.25	10.31	0.45	2.7	0.14	14.95	2.03	8.14	1.49
33	11914.8	72.83	63.39	82.26	4.81	72.72	18.71	4.16	5.67	2.07	23.03	4.31	7.82	2.33	105.02	17.05	104.21	13.75	102.83	82.47	166.25	18.94	104.69	84.14	162.54	18.07	95.05	5.72	109.57	12.46	82.26	5.84	74.9	74.24	77.14	3.25	10.35	0.44	2.69	0.14	14.92	2.02	8.11	1.48
34	12275.9	73.51	64.07	82.95	4.82	73.42	18.99	4.06	5.72	2.09	23.21	4.24	8.02	2.34	105.94	16.9	105.83	14.18	103.93	83.34	167.81	19.11	104.69	84.67	160.75	17.55	95.95	5.72	110.47	12.16	83.06	5.74	75.32	74.69	77.68	3.25	10.41	0.44	2.69	0.13	14.92	1.98	8.09	1.42
35	12636.9	74.18	64.73	83.62	4.82	74.02	19.03	4.22	5.8	2.02	23.25	4.37	8.22	2.32	106.25	17.02	107.03	14.74	104.5	83.97	167.98	19.02	104.83	85.13	159.81	17.24	96.61	5.7	111	12.48	83.71	5.93	75.74	75.15	78.21	3.24	10.46	0.44	2.7	0.13	14.95	1.92	8.08	1.36
36	12998	74.83	65.38	84.29	4.82	74.62	19.29	4.13	5.83	2.07	23.41	4.22	8.36	2.38	107.26	16.96	108.51	14.53	105.45	84.73	169.25	19.15	105.3	85.71	159.84	17.12	97.38	5.71	111.82	12.01	84.39	5.82	76.15	75.59	78.73	3.24	10.51	0.44	2.7	0.13	14.94	1.95	8.07	1.37
37	13359	75.48	66.02	84.93	4.83	75.28	19.48	4.04	5.94	1.98	23.64	4.24	8.52	2.41	108.28	16.78	110.22	15.03	105.42	85.22	167.31	18.62	105.69	86.33	159.29	16.86	98.28	5.73	112.81	12.01	85.16	5.98	76.55	76.03	79.24	3.24	10.57	0.44	2.7	0.13	14.95	1.85	8.04	1.31
38	13720.1	76.11	66.64	85.57	4.83	75.83	19.57	3.99	5.97	2.15	23.7	4.06	8.73	2.53	108.51	16.31	111.25	14.57	106.21	85.84	168.65	18.78	105.68	86.69	158.2	16.53	98.91	5.74	113.31	11.52	85.77	5.82	76.95	76.46	79.74	3.24	10.61	0.44	2.69	0.12	14.9	1.8	8	1.29
39	14081.1	76.72	67.25	86.2	4.83	76.31	19.63	3.98	6.06	2.23	23.73	4	8.91	2.66	108.69	15.76	112.26	14.7	106.83	86.38	169.41	18.83	106.06	87.13	158.39	16.47	99.43	5.78	113.71	11.48	86.29	5.83	77.33	76.89	80.24	3.24	10.64	0.44	2.7	0.12	14.95	1.76	8.02	1.25
40	14442.2	77.33	67.85	86.81	4.84	77	19.86	4.09	6.2	2.03	23.96	4.02	9	2.55	109.98	16.26	113.75	14.8	106.75	86.95	166.47	18.09	107.27	88.05	160.28	16.71	100.36	5.83	114.79	11.5	87.09	5.72	77.72	77.31	80.72	3.23	10.71	0.44	2.7	0.11	15.01	1.7	8.07	1.23
41	14803.2	77.93	68.44	87.41	4.84	77.63	20	4.19	6.35	2.07	24.11	4.08	9.26	2.56	110.47	16.04	115.25	14.99	107.4	87.63	166.73	18.01	107.65	88.64	159.84	16.48	101.15	5.85	115.5	11.68	87.81	5.64	78.1	77.72	81.2	3.23	10.76	0.44	2.7	0.11	15.01	1.65	8.04	1.18
42	15164.3	78.51	69.02	88.01	4.84	78.18	20.11	4.26	6.34	2.11	24.22	4.24	9.4	2.59	110.74	16.18	116.38	15.56	108.61	88.41	169.24	18.4	108	89.18	159.36	16.27	101.82	5.82	116.16	12.19	88.43	5.79	78.48	78.13	81.67	3.22	10.81	0.44	2.7	0.11	15.04	1.65	8.04	1.17
43	15525.4	79.09	69.59	88.59	4.85	78.87	20.3	4.37	6.44	2.18	24.28	4.38	9.68	2.75	111.19	16.84	117.31	16.37	110.11	89.4	172.11	18.84	108.67	89.87	159.93	16.24	102.59	5.79	116.73	12.63	89.19	5.83	78.87	78.54	82.13	3.22	10.88	0.44	2.71	0.11	15.1	1.68	8.07	1.2
44	15886.4	79.66	70.15	89.16	4.85	79.44	20.65	4.43	6.32	2.25	24.57	4.51	9.51	2.82	112.43	17.36	119.02	17.27	113.02	90.78	179.49	20.22	111.01	91.11	165.17	17.17	103.45	5.84	118.04	13.06	89.85	5.89	79.25	78.93	82.59	3.21	10.93	0.44	2.71	0.11	15.13	1.62	8.08	1.15
45	16247.5	80.21	70.7	89.72	4.85	79.98	20.87	4.26	6.22	2.21	24.76	4.33	9.48	2.75	113.01	16.59	119.96	16.97	114.21	91.56	181.66	20.55	111.45	91.67	164.98	17.01	104.19	5.9	119	12.57	90.47	5.64	79.62	79.32	83.04	3.21	10.97	0.44	2.71	0.1	15.12	1.55	8.06	1.1
46	16608.5	80.76	71.24	90.28	4.86	80.4	20.98	4.2	6.23	2.23	24.81	4.29	9.49	2.77	113.49	16.33	120.24	16.7	114.86	92.07	182.71	20.67	111.93	92.11	165.59	17.05	104.67	5.89	119.53	12.47	90.92	5.69	79.98	79.71	83.48	3.2	11	0.44	2.71	0.1	15.15	1.5	8.07	1.07
47	16969.6	81.3	71.77	90.82	4.86	80.88	21.03	4.15	6.35	2.14	24.83	4.26	9.69	2.74	113.71	16.15	120.81	16.9	114.18	92.2	179.33	19.89	111.88	92.41	164.56	16.75	105.18	5.92	119.88	12.38	91.44	5.58	80.33	80.09	83.92	3.19	11.04	0.44	2.72	0.1	15.19	1.49	8.1	1.09
48	17330.6	81.83	72.3	91.36	4.86	81.42	21.12	4.25	6.49	2.24	24.89	4.34	9.89	2.74	114.09	16.15	121.38	16.85	114.91	92.83	180.27	19.96	111.93	92.81	163.48	16.41	105.79	5.92	120.37	12.68	92.04	5.58	80.69	80.47	84.35	3.19	11.1	0.44	2.72	0.1	15.23	1.46	8.11	1.06
49	17691.7	82.35	72.81	91.89	4.87	81.85	21.2	4.18	6.54	2.29	24.93	4.26	9.98	2.73	114.47	15.73	121.42	16.32	115.62	93.36	181.48	20.12	112.13	93.16	163.22	16.27	106.27	5.95	120.81	12.57	92.51	5.54	81.03	80.84	84.78	3.18	11.13	0.44	2.72	0.09	15.23	1.42	8.09	1.02
50	18052.7	82.86	73.32	92.41	4.87	82.38	21.4	4.17	6.56	2.24	25.05	4.29	10.13	2.74	115.19	15.83	122.07	16.59	116.42	94.04	182.27	20.17	112.57	93.7	163.21	16.16	106.93	5.98	121.45	12.65	93.11	5.38	81.37	81.21	85.2	3.17	11.17	0.44	2.72	0.09	15.2	1.4	8.07	1.04
51	18413.8	83.37	73.82	92.92	4.87	82.89	21.52	4.11	6.7	2.28	25.1	4.22	10.27	2.67	115.65	15.69	122.09	16.29	116.91	94.58	182.42	20.09	112.71	94.09	162.6	15.93	107.5	5.98	121.94	12.44	93.66	5.29	81.71	81.57	85.62	3.16	11.22	0.44	2.72	0.09	15.24	1.37	8.08	1.01
52	18774.8	83.87	74.31	93.43	4.88	83.32	21.66	4	6.75	2.24	25.14	4.18	10.38	2.58	116.22	14.96	122.24	15.9	117.38	95.04	182.71	20.06	112.57	94.34	161.2	15.56	107.98	6	122.36	12.3	94.13	5.19	82.04	81.92	86.03	3.15	11.24	0.43	2.72	0.09	15.24	1.39	8.07	0.99
53	19135.9	84.36	74.79	93.93	4.88	83.91	21.85	3.98	6.85	2.15	25.32	4.11	10.55	2.52	116.95	15.05	122.9	15.63	117.79	95.64	182.24	19.84	112.8	94.85	160.47	15.28	108.75	6.03	123.16	12.15	94.81	5.28	82.37	82.28	86.43	3.14	11.3	0.44	2.72	0.09	15.27	1.38	8.09	0.99
54	19497	84.84	75.27	94.42	4.89	84.34	22.09	3.93	6.78	2.09	25.5	4.02	10.43	2.44	117.67	14.59	123.39	15	119.03	96.39	184.65	20.23	113.9	95.54	162.56	15.61	109.37	6.07	124.07	11.89	95.3	5.18	82.7	82.63	86.84	3.13	11.34	0.43	2.72	0.09	15.22	1.33	8.04	0.97
55	19858	85.32	75.74	94.91	4.89	85.02	22.34	3.81	6.78	2.12	25.69	3.97	10.45	2.31	118.34	14.09	123.65	14.45	120.14	97.25	186.27	20.42	114.71	96.31	163.32	15.62	110.24	6.06	125.12	11.73	96.07	5.21	83.03	82.97	87.24	3.11	11.41	0.44	2.72	0.09	15.27	1.33	8.07	0.97
56	20219	85.79	76.2	95.39	4.89	85.38	22.43	3.77	6.72	2.12	25.73	3.93	10.38	2.32	118.7	13.95	123.59	14.11	121.12	97.82	188.5	20.8	115.37	96.78	164.5	15.78	110.65	6.05	125.63	11.64	96.45	5.16	83.35	83.31	87.63	3.1	11.43	0.43	2.72	0.08	15.28	1.29	8.07	0.95
57	20580.1	86.26	76.66	95.86	4.9	85.94	22.57	3.85	6.71	2.31	25.87	4	10.45	2.55	119.47	13.99	124.22	14.17	123.51	98.98	194.58	21.91	116.76	97.66	167.2	16.21	111.36	6.06	126.42	11.93	97.08	5.02	83.68	83.65	88.02	3.09	11.49	0.43	2.72	0.08	15.31	1.29	8.08	0.92
58	20941.2	86.72	77.11	96.33	4.9	86.48	22.81	3.96	6.7	2.34	26.02	4.06	10.53	2.58	120.35	14.63	124.68	14.37	125.41	100.03	198.75	22.64	117.65	98.36	168.47	16.35	112.05	6.09	127.19	12.15	97.69	5.04	84	83.98	88.41	3.07	11.54	0.44	2.73	0.08	15.32	1.29	8.08	0.93
59	21302.2	87.17	77.55	96.79	4.91	86.9	22.96	3.94	6.67	2.27	26.13	4.14	10.46	2.54	121	14.54	124.64	14.25	126.34	100.68	200.15	22.84	118.67	99.02	170.36	16.64	112.59	6.12	127.9	12.35	98.15	4.95	84.32	84.31	88.79	3.06	11.57	0.43	2.73	0.08	15.34	1.27	8.08	0.9
60	21663.3	87.62	77.99	97.24	4.91	87.31	23.05	3.86	6.69	2.22	26.19	3.99	10.53	2.57	121.21	14.13	124.56	13.51	126.73	101.1	200.33	22.79	119.04	99.41	170.71	16.63	113.06	6.15	128.37	11.92	98.6	4.85	84.64	84.63	89.17	3.04	11.61	0.43	2.73	0.08	15.35	1.21	8.09	0.86
61	22024.3	88.06	78.42	97.69	4.92	87.76	23.21	3.85	6.75	2.2	26.32	3.93	10.55	2.47	121.87	14.13	124.88	13.21	127.01	101.56	199.74	22.57	119.33	99.84	170.45	16.48	113.65	6.15	129.07	11.86	99.1	4.9	84.95	84.95	89.54	3.03	11.65	0.43	2.73	0.08	15.38	1.18	8.09	0.84
62	22385.4	88.49	78.84	98.14	4.92	88.29	23.51	3.73	6.72	2.24	26.58	3.91	10.49	2.57	123.12	14.04	125.71	13.1	128.78	102.56	203.49	23.21	120.84	100.78	173.29	16.93	114.44	6.2	130.18	11.83	99.73	4.69	85.26	85.27	89.92	3.01	11.69	0.43	2.73	0.07	15.39	1.15	8.09	0.81
63	22746.4	88.92	79.26	98.58	4.93	88.6	23.58	3.77	6.71	2.26	26.63	3.91	10.52	2.52	123.56	14.12	125.85	12.85	129.1	102.9	203.59	23.17	121.03	101.07	173.08	16.82	114.81	6.2	130.57	11.92	100.07	4.64	85.57	85.59	90.29	2.99	11.71	0.43	2.73	0.07	15.41	1.13	8.1	0.8
64	23107.5	89.35	79.68	99.01	4.93	88.98	23.72	3.77	6.63	2.25	26.71	3.85	10.44	2.51	124	13.94	125.9	12.6	130.67	103.71	207.26	23.83	121.81	101.61	174.47	17.02	115.27	6.22	131.19	11.65	100.48	4.48	85.87	85.9	90.65	2.97	11.74	0.43	2.73	0.07	15.39	1.12	8.07	0.77
65	23468.5	89.77	80.09	99.44	4.94	89.44	23.94	3.7	6.72	2.29	26.96	3.79	10.46	2.52	124.86	13.69	126.76	12.47	131.17	104.25	207.3	23.73	122.81	102.31	176.09	17.25	115.99	6.26	132.14	11.49	101.03	4.37	86.17	86.2	91.01	2.95	11.78	0.43	2.73	0.07	15.39	1.14	8.07	0.79
66	23829.6	90.18	80.49	99.87	4.94	89.87	24.08	3.7	6.81	2.27	27	3.82	10.67	2.61	125.51	13.65	127.06	12.61	131.67	104.75	207.58	23.7	122.86	102.62	175.36	17.01	116.46	6.26	132.46	11.6	101.5	4.34	86.46	86.51	91.37	2.93	11.82	0.43	2.73	0.07	15.38	1.1	8.06	0.75
67	24190.7	90.59	80.89	100.29	4.95	90.24	24.15	3.72	6.82	2.23	27.1	3.83	10.6	2.5	125.88	13.85	127.33	12.83	132.12	105.17	207.99	23.7	123.53	103.13	176.37	17.13	116.94	6.24	133.1	11.77	101.91	4.5	86.75	86.81	91.73	2.91	11.84	0.43	2.73	0.07	15.38	1.04	8.04	0.71
68	24551.7	91	81.29	100.71	4.95	90.63	24.38	3.69	6.79	2.18	27.27	3.76	10.56	2.43	126.89	13.99	127.88	12.59	133.06	105.81	209.47	23.91	124.28	103.68	177.57	17.29	117.5	6.27	133.87	11.44	102.36	4.38	87.04	87.11	92.08	2.89	11.87	0.43	2.73	0.07	15.39	1.02	8.04	0.71
69	24912.8	91.4	81.68	101.12	4.96	91.07	24.56	3.58	6.8	2.12	27.49	3.69	10.47	2.46	127.44	13.49	128.63	12.31	133.65	106.34	210.05	23.93	125.42	104.41	179.64	17.61	118.16	6.3	134.84	11.23	102.88	4.27	87.33	87.4	92.43	2.87	11.92	0.43	2.73	0.07	15.4	1.02	8.04	0.7
70	25273.8	91.79	82.06	101.53	4.97	91.43	24.7	3.61	6.64	2.1	27.55	3.73	10.35	2.4	127.9	13.39	128.78	12.24	135.48	107.22	214.58	24.77	126.36	104.99	181.54	17.92	118.59	6.3	135.44	11.25	103.26	4.31	87.61	87.69	92.78	2.85	11.94	0.43	2.73	0.07	15.41	1.03	8.05	0.71
71	25634.9	92.19	82.44	101.93	4.97	91.78	24.88	3.57	6.68	2.04	27.68	3.63	10.38	2.5	128.85	13.66	129.24	12.09	135.88	107.64	214.65	24.71	127.1	105.49	182.92	18.12	119.07	6.31	136.03	10.92	103.66	4.26	87.89	87.98	93.13	2.82	11.97	0.43	2.73	0.07	15.4	1.01	8.04	0.7
72	25995.9	92.57	82.82	102.33	4.98	92.12	25.03	3.6	6.65	2.01	27.77	3.65	10.32	2.46	129.56	13.56	129.59	12.08	136.78	108.22	216.22	24.95	127.82	105.98	184.2	18.31	119.5	6.3	136.61	10.93	104.03	4.31	88.17	88.27	93.47	2.8	12	0.43	2.73	0.06	15.42	1	8.04	0.7
73	26357	92.96	83.19	102.73	4.99	92.37	25.08	3.68	6.62	2.04	27.75	3.69	10.33	2.47	129.77	13.53	129.43	12.08	137.76	108.72	218.61	25.38	127.97	106.2	184.17	18.25	119.74	6.29	136.82	11.03	104.28	4.37	88.44	88.55	93.81	2.77	12.01	0.43	2.73	0.06	15.39	0.98	8.02	0.67
74	26718	93.34	83.55	103.12	4.99	92.77	25.3	3.66	6.56	2.02	27.88	3.69	10.36	2.51	130.57	13.53	129.98	12.17	139.22	109.53	221.77	25.93	128.47	106.68	184.57	18.24	120.27	6.3	137.46	11.01	104.73	4.35	88.7	88.83	94.15	2.75	12.05	0.43	2.73	0.06	15.4	0.93	8.02	0.66
75	27079.1	93.71	83.92	103.51	5	93.1	25.4	3.7	6.63	2.06	27.9	3.71	10.48	2.55	131.1	13.45	130.08	11.93	139.61	109.92	221.96	25.9	128.49	106.9	184.02	18.06	120.63	6.32	137.72	11.13	105.09	4.46	88.97	89.11	94.48	2.72	12.07	0.43	2.73	0.06	15.4	0.9	8.03	0.63
76	27440.2	94.09	84.28	103.9	5.01	93.45	25.53	3.74	6.64	2.06	28	3.75	10.44	2.54	131.68	13.56	130.36	11.96	141.38	110.76	226.42	26.72	129.39	107.47	185.77	18.34	121.08	6.32	138.32	11.26	105.48	4.46	89.23	89.39	94.82	2.69	12.1	0.43	2.73	0.06	15.41	0.86	8.03	0.61
77	27801.2	94.46	84.63	104.28	5.01	93.9	25.67	3.8	6.58	2.04	28.11	3.81	10.29	2.52	132.29	13.74	130.55	11.79	142.02	111.33	226.95	26.73	130.57	108.21	188.05	18.7	121.64	6.32	139.13	11.31	105.96	4.48	89.49	89.66	95.15	2.66	12.14	0.43	2.73	0.05	15.42	0.83	8.02	0.59
78	28162.2	94.82	84.98	104.66	5.02	94.28	25.85	3.8	6.56	2.02	28.25	3.79	10.27	2.48	133.2	13.81	130.91	11.78	143.36	112.08	229.82	27.23	131.35	108.76	189.31	18.87	122.17	6.36	139.82	11.29	106.4	4.47	89.75	89.93	95.48	2.63	12.17	0.43	2.74	0.05	15.44	0.82	8.03	0.59
79	28523.3	95.18	85.33	105.04	5.03	94.57	25.93	3.92	6.5	1.94	28.29	3.92	10.26	2.41	133.5	14.23	130.97	12.16	144.18	112.59	231.39	27.48	131.81	109.14	189.92	18.93	122.5	6.34	140.2	11.67	106.71	4.6	90.01	90.2	95.8	2.6	12.2	0.43	2.74	0.05	15.46	0.81	8.04	0.59
80	28884.4	95.54	85.67	105.41	5.04	94.91	26.08	3.93	6.48	1.99	28.31	3.93	10.29	2.42	134.08	14.11	130.79	11.98	145.64	113.35	234.71	28.08	132.25	109.52	190.46	18.97	122.87	6.35	140.56	11.76	107.06	4.51	90.26	90.46	96.13	2.57	12.22	0.43	2.74	0.05	15.45	0.78	8.03	0.57
81	29245.4	95.89	86.01	105.78	5.04	95.32	26.23	4.02	6.51	1.94	28.4	3.98	10.32	2.35	134.74	14.26	131.13	12.15	146.09	113.85	234.66	27.97	132.8	110.01	191.13	19.02	123.37	6.37	141.13	11.88	107.51	4.58	90.52	90.73	96.45	2.54	12.26	0.43	2.74	0.05	15.47	0.78	8.04	0.57
82	29606.5	96.25	86.34	106.15	5.05	95.62	26.28	3.91	6.59	1.95	28.39	3.81	10.41	2.39	135.06	13.8	131.05	11.42	145.82	113.97	233.13	27.6	132.75	110.16	190.61	18.86	123.66	6.37	141.33	11.43	107.82	4.46	90.77	90.99	96.77	2.5	12.28	0.43	2.74	0.05	15.47	0.73	8.04	0.54
83	29967.5	96.59	86.68	106.51	5.06	95.94	26.44	3.98	6.62	1.96	28.46	3.91	10.49	2.41	135.83	14.18	131.4	11.66	146.65	114.52	234.51	27.8	133.22	110.56	191.18	18.9	124.06	6.39	141.72	11.69	108.18	4.5	91.02	91.25	97.08	2.47	12.31	0.43	2.74	0.05	15.47	0.72	8.05	0.54
84	30328.6	96.94	87	106.87	5.07	96.32	26.61	3.95	6.6	1.94	28.58	3.85	10.49	2.36	136.58	14	131.77	11.5	147.8	115.21	236.85	28.19	133.75	111.03	191.75	18.93	124.56	6.4	142.34	11.58	108.6	4.46	91.26	91.5	97.4	2.43	12.34	0.43	2.74	0.05	15.51	0.72	8.07	0.54
85	30689.6	97.28	87.33	107.23	5.08	96.66	26.84	3.96	6.5	1.93	28.79	3.86	10.33	2.38	137.62	14.29	132.45	11.68	149.78	116.16	241.59	29.07	135.35	111.87	195.22	19.55	125.11	6.44	143.26	11.7	109.01	4.5	91.51	91.76	97.71	2.39	12.37	0.43	2.74	0.04	15.51	0.67	8.07	0.52
86	31050.7	97.62	87.65	107.59	5.09	97.06	27.01	3.91	6.53	1.98	28.97	3.77	10.33	2.39	138.25	13.78	133.05	11.2	151.55	117.03	245.95	29.87	136.1	112.44	196.3	19.68	125.69	6.45	144.02	11.47	109.47	4.43	91.75	92.01	98.03	2.35	12.41	0.43	2.74	0.04	15.54	0.66	8.1	0.51
87	31411.8	97.96	87.97	107.95	5.1	97.4	27.14	3.8	6.65	1.98	29.08	3.69	10.41	2.43	138.87	13.48	133.61	10.99	151.83	117.38	245.9	29.79	136.69	112.89	197.2	19.79	126.15	6.46	144.5	11.24	109.86	4.18	91.99	92.26	98.34	2.31	12.43	0.43	2.74	0.04	15.53	0.65	8.09	0.49
88	31772.8	98.29	88.28	108.3	5.11	97.77	27.38	3.82	6.67	1.94	29.28	3.71	10.38	2.39	140.05	13.68	134.24	10.94	152.32	117.9	245.8	29.67	137.64	113.52	198.82	20.02	126.72	6.49	145.3	11.24	110.3	4.14	92.24	92.51	98.64	2.27	12.46	0.43	2.74	0.04	15.55	0.62	8.1	0.48
89	32133.8	98.62	88.6	108.65	5.11	98.03	27.47	3.82	6.67	2	29.28	3.71	10.44	2.41	140.62	13.7	134.36	11.09	153.35	118.43	248.19	30.1	137.8	113.74	198.8	19.97	126.98	6.47	145.51	11.25	110.57	4.14	92.47	92.75	98.95	2.22	12.48	0.43	2.74	0.04	15.56	0.6	8.11	0.47
90	32494.9	98.95	88.9	108.99	5.12	98.46	27.76	3.61	6.64	1.94	29.52	3.52	10.44	2.35	141.79	13.13	135.09	10.57	154.31	119.14	249.41	30.25	138.49	114.32	199.59	20.03	127.65	6.51	146.42	10.63	111.08	3.94	92.71	93	99.25	2.18	12.52	0.43	2.74	0.04	15.56	0.57	8.11	0.45
91	32856	99.27	89.21	109.34	5.13	98.78	27.84	3.6	6.71	1.87	29.59	3.45	10.49	2.24	142.27	13.08	135.44	10.26	153.73	119.23	246.6	29.6	138.44	114.53	198.74	19.79	128.04	6.51	146.84	10.44	111.44	3.89	92.95	93.24	99.56	2.13	12.55	0.43	2.74	0.04	15.56	0.55	8.1	0.44
92	33217	99.6	89.51	109.68	5.14	99.13	28	3.53	6.69	1.93	29.72	3.4	10.47	2.3	142.9	12.77	135.88	10.09	155.11	119.96	249.74	30.16	139.36	115.11	200.48	20.06	128.53	6.54	147.47	10.35	111.84	3.77	93.19	93.48	99.86	2.08	12.59	0.43	2.74	0.03	15.57	0.52	8.1	0.41
93	33578.1	99.92	89.81	110.02	5.16	99.41	28.08	3.61	6.73	1.96	29.79	3.45	10.5	2.28	143.48	13.05	136.08	10.21	156.24	120.53	252.5	30.66	139.77	115.47	200.94	20.09	128.88	6.54	147.87	10.59	112.14	3.83	93.42	93.72	100.16	2.03	12.6	0.43	2.74	0.03	15.57	0.51	8.09	0.4
94	33939.1	100.23	90.11	110.36	5.17	99.7	28.18	3.45	6.76	1.88	29.86	3.31	10.47	2.23	143.96	12.77	136.45	9.95	156.06	120.7	251.17	30.32	140.24	115.83	201.68	20.18	129.24	6.57	148.33	10.14	112.46	3.67	93.65	93.95	100.45	1.98	12.62	0.43	2.75	0.03	15.57	0.51	8.09	0.39
95	34300.2	100.55	90.4	110.69	5.18	99.93	28.24	3.23	6.84	1.76	29.87	3.08	10.47	2.07	144.51	12.04	136.49	9.24	154.79	120.45	246.69	29.36	139.98	115.88	200.6	19.92	129.49	6.58	148.59	9.46	112.69	3.58	93.88	94.19	100.75	1.92	12.64	0.43	2.75	0.03	15.59	0.47	8.1	0.36
96	34661.2	100.86	90.69	111.03	5.19	100.41	28.52	3.11	6.9	1.78	30.07	2.9	10.53	1.99	145.67	11.25	137.1	8.55	155.6	121.15	247.45	29.4	140.29	116.35	200.3	19.75	130.17	6.6	149.41	8.92	113.25	3.45	94.11	94.42	101.04	1.86	12.69	0.43	2.75	0.03	15.62	0.47	8.12	0.35
97	35022.3	101.2	91.01	111.39	5.2	100.8	28.66	2.98	6.96	1.79	30.12	2.73	10.69	1.98	146.36	10.78	137.45	8.05	155.96	121.58	247.4	29.3	140.16	116.55	199.23	19.46	130.61	6.59	149.75	8.47	113.68	3.22	94.34	94.65	101.34	1.8	12.73	0.43	2.75	0.03	15.62	0.47	8.12	0.35
98	35383.3	101.48	91.27	111.69	5.21	101.04	28.58	2.9	7.16	1.61	29.98	2.69	10.93	1.92	146.44	10.29	137.27	7.89	153.16	120.81	238.54	27.45	139.01	116.25	195.9	18.75	130.71	6.58	149.49	8.36	113.9	3.21	94.56	94.88	101.63	1.74	12.75	0.43	2.75	0.03	15.64	0.48	8.14	0.36
99	35744.4	101.79	91.55	112.02	5.22	101.37	28.69	2.77	7.23	1.54	30.05	2.54	11.03	1.82	146.97	9.84	137.55	7.57	153.08	121.03	237.44	27.16	138.91	116.43	195	18.5	131.12	6.59	149.86	7.86	114.26	3.14	94.79	95.11	101.92	1.67	12.77	0.43	2.75	0.03	15.59	0.45	8.09	0.32
100	36105.4	102.09	91.83	112.35	5.23	101.7	28.86	2.69	7.23	1.5	30.22	2.44	10.98	1.82	147.81	9.64	138.08	7.26	153.9	121.58	238.83	27.36	139.83	117.01	196.69	18.76	131.62	6.61	150.58	7.59	114.65	3.02	95.01	95.34	102.2	1.6	12.8	0.43	2.75	0.03	15.6	0.4	8.1	0.29
101	36466.5	102.39	92.11	112.67	5.25	102.1	29.09	2.49	7.23	1.39	30.42	2.23	10.97	1.73	148.92	9.26	138.77	6.77	154.55	122.14	239.39	27.38	140.53	117.57	197.6	18.85	132.22	6.63	151.39	7.03	115.12	2.81	95.24	95.56	102.49	1.52	12.84	0.43	2.75	0.02	15.6	0.36	8.09	0.26
102	36827.6	102.69	92.38	113	5.26	102.5	29.28	2.28	7.31	1.27	30.58	2.07	11.04	1.58	149.85	8.51	139.42	6.18	154.67	122.51	238.57	27.12	140.93	118.01	197.76	18.79	132.78	6.65	152.04	6.43	115.59	2.57	95.46	95.78	102.77	1.44	12.88	0.43	2.75	0.02	15.63	0.33	8.11	0.24
103	37188.6	102.98	92.65	113.32	5.27	102.82	29.35	2.19	7.42	1.22	30.62	2	11.22	1.51	150.44	8.27	139.81	5.96	154.45	122.67	237.13	26.76	140.72	118.14	196.59	18.49	133.14	6.65	152.27	6.23	115.94	2.45	95.69	96.01	103.06	1.35	12.9	0.43	2.75	0.02	15.64	0.3	8.12	0.22
104	37549.7	103.28	92.92	113.64	5.28	103.12	29.42	1.98	7.49	1.2	30.66	1.77	11.31	1.38	150.75	7.28	140	5.31	154.37	122.85	236.24	26.51	140.62	118.29	195.81	18.28	133.49	6.66	152.57	5.51	116.26	2.19	95.91	96.23	103.34	1.25	12.93	0.43	2.75	0.02	15.65	0.29	8.12	0.21
105	37910.7	103.57	93.19	113.95	5.3	103.41	29.47	1.86	7.61	1.15	30.71	1.72	11.43	1.27	151.29	6.69	140.41	5.22	153.78	122.86	233.85	25.96	140.52	118.45	194.98	18.05	133.83	6.68	152.85	5.32	116.58	2.06	96.13	96.44	103.62	1.15	12.95	0.43	2.75	0.02	15.63	0.26	8.1	0.19
106	38271.8	103.86	93.45	114.27	5.31	103.66	29.55	1.74	7.63	1	30.73	1.61	11.42	1.22	151.86	6.33	140.48	4.83	153.83	123.08	233.33	25.8	140.81	118.72	195.3	18.06	134.1	6.7	153.15	4.99	116.84	1.95	96.35	96.66	103.9	1.03	12.97	0.43	2.75	0.01	15.62	0.22	8.1	0.16
107	38632.8	104.15	93.71	114.58	5.32	103.95	29.69	1.67	7.68	0.95	30.84	1.52	11.46	1.12	152.9	6.2	140.98	4.41	154.28	123.46	233.77	25.82	141.19	119.07	195.69	18.08	134.5	6.72	153.63	4.71	117.17	1.74	96.56	96.88	104.18	0.9	12.99	0.43	2.75	0.01	15.63	0.21	8.11	0.15
108	38993.9	104.43	93.97	114.9	5.34	104.3	29.81	1.35	7.77	0.76	30.91	1.25	11.6	0.91	153.63	5.12	141.35	3.55	154.08	123.66	232.28	25.44	141.09	119.26	194.76	17.82	134.92	6.73	153.98	3.83	117.56	1.35	96.78	97.09	104.45	0.73	13.03	0.43	2.75	0.01	15.65	0.15	8.12	0.11
109	39354.9	104.72	94.23	115.21	5.35	104.6	29.84	1.03	7.85	0.56	30.87	0.97	11.85	0.64	154.03	3.86	141.47	2.77	153.65	123.72	230.45	25.01	140.36	119.16	192.43	17.29	135.19	6.74	153.97	2.97	117.87	1.06	96.99	97.3	104.73	0.52	13.05	0.43	2.75	0.01	15.66	0.1	8.12	0.06
110	39716	105	94.48	115.52	5.37	105	30	0	8	0	31	0	12	0	154.89	0	142.11	0.02	153.33	123.92	228.49	24.52	140.44	119.46	191.86	17.09	135.72	6.77	154.48	0	118.34	0	97.21	97.51	0	0	13.1	0.43	2.75	0	15.68	0	8.13	0
111	40077.1	105.28	94.73	115.83	5.38	0	0	0	0	0	0	0	0	0	0	0	0	0	0	0	0	0	0	0	0	0	0	0	0	0	0	0	0	0	0	0	0	0	0	0	0	0	0	0
112	40438.1	105.56	94.98	116.13	5.4	0	0	0	0	0	0	0	0	0	0	0	0	0	0	0	0	0	0	0	0	0	0	0	0	0	0	0	0	0	0	0	0	0	0	0	0	0	0	0
113	40799.2	105.83	95.23	116.44	5.41	0	0	0	0	0	0	0	0	0	0	0	0	0	0	0	0	0	0	0	0	0	0	0	0	0	0	0	0	0	0	0	0	0	0	0	0	0	0	0
114	41160.2	106.11	95.47	116.74	5.43	0	0	0	0	0	0	0	0	0	0	0	0	0	0	0	0	0	0	0	0	0	0	0	0	0	0	0	0	0	0	0	0	0	0	0	0	0	0	0
115	41521.3	106.38	95.72	117.04	5.44	0	0	0	0	0	0	0	0	0	0	0	0	0	0	0	0	0	0	0	0	0	0	0	0	0	0	0	0	0	0	0	0	0	0	0	0	0	0	0
116	41882.3	106.65	95.95	117.34	5.46	0	0	0	0	0	0	0	0	0	0	0	0	0	0	0	0	0	0	0	0	0	0	0	0	0	0	0	0	0	0	0	0	0	0	0	0	0	0	0
117	42243.4	106.92	96.19	117.64	5.47	0	0	0	0	0	0	0	0	0	0	0	0	0	0	0	0	0	0	0	0	0	0	0	0	0	0	0	0	0	0	0	0	0	0	0	0	0	0	0
118	42604.4	107.18	96.43	117.94	5.49	0	0	0	0	0	0	0	0	0	0	0	0	0	0	0	0	0	0	0	0	0	0	0	0	0	0	0	0	0	0	0	0	0	0	0	0	0	0	0
119	42965.5	107.45	96.66	118.24	5.51	0	0	0	0	0	0	0	0	0	0	0	0	0	0	0	0	0	0	0	0	0	0	0	0	0	0	0	0	0	0	0	0	0	0	0	0	0	0	0
120	43326.6	107.71	96.89	118.53	5.52	0	0	0	0	0	0	0	0	0	0	0	0	0	0	0	0	0	0	0	0	0	0	0	0	0	0	0	0	0	0	0	0	0	0	0	0	0	0	0
121	43687.6	107.97	97.12	118.83	5.54	0	0	0	0	0	0	0	0	0	0	0	0	0	0	0	0	0	0	0	0	0	0	0	0	0	0	0	0	0	0	0	0	0	0	0	0	0	0	0
122	44048.7	108.23	97.34	119.12	5.56	0	0	0	0	0	0	0	0	0	0	0	0	0	0	0	0	0	0	0	0	0	0	0	0	0	0	0	0	0	0	0	0	0	0	0	0	0	0	0
123	44409.7	108.49	97.56	119.41	5.57	0	0	0	0	0	0	0	0	0	0	0	0	0	0	0	0	0	0	0	0	0	0	0	0	0	0	0	0	0	0	0	0	0	0	0	0	0	0	0
124	44770.8	108.74	97.79	119.7	5.59	0	0	0	0	0	0	0	0	0	0	0	0	0	0	0	0	0	0	0	0	0	0	0	0	0	0	0	0	0	0	0	0	0	0	0	0	0	0	0
125	45131.8	109	98	119.99	5.61	0	0	0	0	0	0	0	0	0	0	0	0	0	0	0	0	0	0	0	0	0	0	0	0	0	0	0	0	0	0	0	0	0	0	0	0	0	0	0
126	45492.9	109.25	98.22	120.28	5.63	0	0	0	0	0	0	0	0	0	0	0	0	0	0	0	0	0	0	0	0	0	0	0	0	0	0	0	0	0	0	0	0	0	0	0	0	0	0	0
127	45853.9	109.5	98.43	120.56	5.65	0	0	0	0	0	0	0	0	0	0	0	0	0	0	0	0	0	0	0	0	0	0	0	0	0	0	0	0	0	0	0	0	0	0	0	0	0	0	0
128	46215	109.75	98.65	120.85	5.66	0	0	0	0	0	0	0	0	0	0	0	0	0	0	0	0	0	0	0	0	0	0	0	0	0	0	0	0	0	0	0	0	0	0	0	0	0	0	0
129	46576	109.99	98.85	121.13	5.68	0	0	0	0	0	0	0	0	0	0	0	0	0	0	0	0	0	0	0	0	0	0	0	0	0	0	0	0	0	0	0	0	0	0	0	0	0	0	0
130	46937.1	110.24	99.06	121.41	5.7	0	0	0	0	0	0	0	0	0	0	0	0	0	0	0	0	0	0	0	0	0	0	0	0	0	0	0	0	0	0	0	0	0	0	0	0	0	0	0
131	47298.2	110.48	99.27	121.69	5.72	0	0	0	0	0	0	0	0	0	0	0	0	0	0	0	0	0	0	0	0	0	0	0	0	0	0	0	0	0	0	0	0	0	0	0	0	0	0	0
132	47659.2	110.72	99.47	121.97	5.74	0	0	0	0	0	0	0	0	0	0	0	0	0	0	0	0	0	0	0	0	0	0	0	0	0	0	0	0	0	0	0	0	0	0	0	0	0	0	0
133	48020.2	110.96	99.67	122.25	5.76	0	0	0	0	0	0	0	0	0	0	0	0	0	0	0	0	0	0	0	0	0	0	0	0	0	0	0	0	0	0	0	0	0	0	0	0	0	0	0
134	48381.3	111.2	99.87	122.53	5.78	0	0	0	0	0	0	0	0	0	0	0	0	0	0	0	0	0	0	0	0	0	0	0	0	0	0	0	0	0	0	0	0	0	0	0	0	0	0	0
135	48742.4	111.43	100.06	122.8	5.8	0	0	0	0	0	0	0	0	0	0	0	0	0	0	0	0	0	0	0	0	0	0	0	0	0	0	0	0	0	0	0	0	0	0	0	0	0	0	0
136	49103.4	111.67	100.26	123.08	5.82	0	0	0	0	0	0	0	0	0	0	0	0	0	0	0	0	0	0	0	0	0	0	0	0	0	0	0	0	0	0	0	0	0	0	0	0	0	0	0
137	49464.5	111.9	100.45	123.35	5.84	0	0	0	0	0	0	0	0	0	0	0	0	0	0	0	0	0	0	0	0	0	0	0	0	0	0	0	0	0	0	0	0	0	0	0	0	0	0	0
138	49825.5	112.13	100.64	123.63	5.86	0	0	0	0	0	0	0	0	0	0	0	0	0	0	0	0	0	0	0	0	0	0	0	0	0	0	0	0	0	0	0	0	0	0	0	0	0	0	0
139	50186.6	112.36	100.83	123.9	5.89	0	0	0	0	0	0	0	0	0	0	0	0	0	0	0	0	0	0	0	0	0	0	0	0	0	0	0	0	0	0	0	0	0	0	0	0	0	0	0
140	50547.6	112.59	101.01	124.17	5.91	0	0	0	0	0	0	0	0	0	0	0	0	0	0	0	0	0	0	0	0	0	0	0	0	0	0	0	0	0	0	0	0	0	0	0	0	0	0	0
141	50908.7	112.82	101.2	124.44	5.93	0	0	0	0	0	0	0	0	0	0	0	0	0	0	0	0	0	0	0	0	0	0	0	0	0	0	0	0	0	0	0	0	0	0	0	0	0	0	0
142	51269.8	113.04	101.38	124.7	5.95	0	0	0	0	0	0	0	0	0	0	0	0	0	0	0	0	0	0	0	0	0	0	0	0	0	0	0	0	0	0	0	0	0	0	0	0	0	0	0
143	51630.8	113.26	101.56	124.97	5.97	0	0	0	0	0	0	0	0	0	0	0	0	0	0	0	0	0	0	0	0	0	0	0	0	0	0	0	0	0	0	0	0	0	0	0	0	0	0	0
144	51991.8	113.49	101.73	125.24	6	0	0	0	0	0	0	0	0	0	0	0	0	0	0	0	0	0	0	0	0	0	0	0	0	0	0	0	0	0	0	0	0	0	0	0	0	0	0	0
145	52352.9	113.71	101.91	125.5	6.02	0	0	0	0	0	0	0	0	0	0	0	0	0	0	0	0	0	0	0	0	0	0	0	0	0	0	0	0	0	0	0	0	0	0	0	0	0	0	0
146	52714	113.92	102.08	125.77	6.04	0	0	0	0	0	0	0	0	0	0	0	0	0	0	0	0	0	0	0	0	0	0	0	0	0	0	0	0	0	0	0	0	0	0	0	0	0	0	0
147	53075	114.14	102.25	126.03	6.06	0	0	0	0	0	0	0	0	0	0	0	0	0	0	0	0	0	0	0	0	0	0	0	0	0	0	0	0	0	0	0	0	0	0	0	0	0	0	0
148	53436.1	114.36	102.42	126.29	6.09	0	0	0	0	0	0	0	0	0	0	0	0	0	0	0	0	0	0	0	0	0	0	0	0	0	0	0	0	0	0	0	0	0	0	0	0	0	0	0
149	53797.1	114.57	102.59	126.55	6.11	0	0	0	0	0	0	0	0	0	0	0	0	0	0	0	0	0	0	0	0	0	0	0	0	0	0	0	0	0	0	0	0	0	0	0	0	0	0	0
150	54158.2	114.78	102.76	126.81	6.14	0	0	0	0	0	0	0	0	0	0	0	0	0	0	0	0	0	0	0	0	0	0	0	0	0	0	0	0	0	0	0	0	0	0	0	0	0	0	0
151	54519.2	114.99	102.92	127.07	6.16	0	0	0	0	0	0	0	0	0	0	0	0	0	0	0	0	0	0	0	0	0	0	0	0	0	0	0	0	0	0	0	0	0	0	0	0	0	0	0
152	54880.3	115.2	103.08	127.33	6.18	0	0	0	0	0	0	0	0	0	0	0	0	0	0	0	0	0	0	0	0	0	0	0	0	0	0	0	0	0	0	0	0	0	0	0	0	0	0	0
153	55241.3	115.41	103.24	127.58	6.21	0	0	0	0	0	0	0	0	0	0	0	0	0	0	0	0	0	0	0	0	0	0	0	0	0	0	0	0	0	0	0	0	0	0	0	0	0	0	0
154	55602.4	115.62	103.4	127.84	6.23	0	0	0	0	0	0	0	0	0	0	0	0	0	0	0	0	0	0	0	0	0	0	0	0	0	0	0	0	0	0	0	0	0	0	0	0	0	0	0
155	55963.4	115.82	103.55	128.09	6.26	0	0	0	0	0	0	0	0	0	0	0	0	0	0	0	0	0	0	0	0	0	0	0	0	0	0	0	0	0	0	0	0	0	0	0	0	0	0	0
156	56324.5	116.03	103.71	128.34	6.29	0	0	0	0	0	0	0	0	0	0	0	0	0	0	0	0	0	0	0	0	0	0	0	0	0	0	0	0	0	0	0	0	0	0	0	0	0	0	0
157	56685.6	116.23	103.86	128.6	6.31	0	0	0	0	0	0	0	0	0	0	0	0	0	0	0	0	0	0	0	0	0	0	0	0	0	0	0	0	0	0	0	0	0	0	0	0	0	0	0
158	57046.6	116.43	104.01	128.85	6.34	0	0	0	0	0	0	0	0	0	0	0	0	0	0	0	0	0	0	0	0	0	0	0	0	0	0	0	0	0	0	0	0	0	0	0	0	0	0	0
159	57407.7	116.63	104.16	129.1	6.36	0	0	0	0	0	0	0	0	0	0	0	0	0	0	0	0	0	0	0	0	0	0	0	0	0	0	0	0	0	0	0	0	0	0	0	0	0	0	0
160	57768.7	116.83	104.3	129.35	6.39	0	0	0	0	0	0	0	0	0	0	0	0	0	0	0	0	0	0	0	0	0	0	0	0	0	0	0	0	0	0	0	0	0	0	0	0	0	0	0
161	58129.8	117.02	104.45	129.6	6.42	0	0	0	0	0	0	0	0	0	0	0	0	0	0	0	0	0	0	0	0	0	0	0	0	0	0	0	0	0	0	0	0	0	0	0	0	0	0	0
162	58490.8	117.22	104.59	129.84	6.44	0	0	0	0	0	0	0	0	0	0	0	0	0	0	0	0	0	0	0	0	0	0	0	0	0	0	0	0	0	0	0	0	0	0	0	0	0	0	0
163	58851.9	117.41	104.73	130.09	6.47	0	0	0	0	0	0	0	0	0	0	0	0	0	0	0	0	0	0	0	0	0	0	0	0	0	0	0	0	0	0	0	0	0	0	0	0	0	0	0
164	59212.9	117.6	104.87	130.34	6.5	0	0	0	0	0	0	0	0	0	0	0	0	0	0	0	0	0	0	0	0	0	0	0	0	0	0	0	0	0	0	0	0	0	0	0	0	0	0	0
165	59574	117.79	105.01	130.58	6.52	0	0	0	0	0	0	0	0	0	0	0	0	0	0	0	0	0	0	0	0	0	0	0	0	0	0	0	0	0	0	0	0	0	0	0	0	0	0	0
166	59935.1	117.98	105.14	130.82	6.55	0	0	0	0	0	0	0	0	0	0	0	0	0	0	0	0	0	0	0	0	0	0	0	0	0	0	0	0	0	0	0	0	0	0	0	0	0	0	0
167	60296.1	118.17	105.28	131.07	6.58	0	0	0	0	0	0	0	0	0	0	0	0	0	0	0	0	0	0	0	0	0	0	0	0	0	0	0	0	0	0	0	0	0	0	0	0	0	0	0
168	60657.2	118.36	105.41	131.31	6.61	0	0	0	0	0	0	0	0	0	0	0	0	0	0	0	0	0	0	0	0	0	0	0	0	0	0	0	0	0	0	0	0	0	0	0	0	0	0	0
169	61018.2	118.54	105.54	131.55	6.64	0	0	0	0	0	0	0	0	0	0	0	0	0	0	0	0	0	0	0	0	0	0	0	0	0	0	0	0	0	0	0	0	0	0	0	0	0	0	0
170	61379.3	118.73	105.67	131.79	6.66	0	0	0	0	0	0	0	0	0	0	0	0	0	0	0	0	0	0	0	0	0	0	0	0	0	0	0	0	0	0	0	0	0	0	0	0	0	0	0
171	61740.3	118.91	105.79	132.03	6.69	0	0	0	0	0	0	0	0	0	0	0	0	0	0	0	0	0	0	0	0	0	0	0	0	0	0	0	0	0	0	0	0	0	0	0	0	0	0	0
172	62101.4	119.09	105.92	132.27	6.72	0	0	0	0	0	0	0	0	0	0	0	0	0	0	0	0	0	0	0	0	0	0	0	0	0	0	0	0	0	0	0	0	0	0	0	0	0	0	0
173	62462.4	119.27	106.04	132.5	6.75	0	0	0	0	0	0	0	0	0	0	0	0	0	0	0	0	0	0	0	0	0	0	0	0	0	0	0	0	0	0	0	0	0	0	0	0	0	0	0
174	62823.5	119.45	106.17	132.74	6.78	0	0	0	0	0	0	0	0	0	0	0	0	0	0	0	0	0	0	0	0	0	0	0	0	0	0	0	0	0	0	0	0	0	0	0	0	0	0	0
175	63184.6	119.63	106.29	132.98	6.81	0	0	0	0	0	0	0	0	0	0	0	0	0	0	0	0	0	0	0	0	0	0	0	0	0	0	0	0	0	0	0	0	0	0	0	0	0	0	0
176	63545.6	119.81	106.4	133.21	6.84	0	0	0	0	0	0	0	0	0	0	0	0	0	0	0	0	0	0	0	0	0	0	0	0	0	0	0	0	0	0	0	0	0	0	0	0	0	0	0
177	63906.7	119.98	106.52	133.44	6.87	0	0	0	0	0	0	0	0	0	0	0	0	0	0	0	0	0	0	0	0	0	0	0	0	0	0	0	0	0	0	0	0	0	0	0	0	0	0	0
178	64267.7	120.16	106.64	133.68	6.9	0	0	0	0	0	0	0	0	0	0	0	0	0	0	0	0	0	0	0	0	0	0	0	0	0	0	0	0	0	0	0	0	0	0	0	0	0	0	0
179	64628.8	120.33	106.75	133.91	6.93	0	0	0	0	0	0	0	0	0	0	0	0	0	0	0	0	0	0	0	0	0	0	0	0	0	0	0	0	0	0	0	0	0	0	0	0	0	0	0
180	64989.8	120.5	106.86	134.14	6.96	0	0	0	0	0	0	0	0	0	0	0	0	0	0	0	0	0	0	0	0	0	0	0	0	0	0	0	0	0	0	0	0	0	0	0	0	0	0	0
181	65350.9	120.67	106.97	134.37	6.99	0	0	0	0	0	0	0	0	0	0	0	0	0	0	0	0	0	0	0	0	0	0	0	0	0	0	0	0	0	0	0	0	0	0	0	0	0	0	0
182	65711.9	120.84	107.08	134.6	7.02	0	0	0	0	0	0	0	0	0	0	0	0	0	0	0	0	0	0	0	0	0	0	0	0	0	0	0	0	0	0	0	0	0	0	0	0	0	0	0
183	66073	121.01	107.19	134.83	7.05	0	0	0	0	0	0	0	0	0	0	0	0	0	0	0	0	0	0	0	0	0	0	0	0	0	0	0	0	0	0	0	0	0	0	0	0	0	0	0
184	66434	121.18	107.3	135.06	7.08	0	0	0	0	0	0	0	0	0	0	0	0	0	0	0	0	0	0	0	0	0	0	0	0	0	0	0	0	0	0	0	0	0	0	0	0	0	0	0
185	66795.1	121.34	107.4	135.28	7.11	0	0	0	0	0	0	0	0	0	0	0	0	0	0	0	0	0	0	0	0	0	0	0	0	0	0	0	0	0	0	0	0	0	0	0	0	0	0	0
186	67156.1	121.51	107.51	135.51	7.14	0	0	0	0	0	0	0	0	0	0	0	0	0	0	0	0	0	0	0	0	0	0	0	0	0	0	0	0	0	0	0	0	0	0	0	0	0	0	0
187	67517.2	121.67	107.61	135.73	7.17	0	0	0	0	0	0	0	0	0	0	0	0	0	0	0	0	0	0	0	0	0	0	0	0	0	0	0	0	0	0	0	0	0	0	0	0	0	0	0
188	67878.2	121.83	107.71	135.96	7.21	0	0	0	0	0	0	0	0	0	0	0	0	0	0	0	0	0	0	0	0	0	0	0	0	0	0	0	0	0	0	0	0	0	0	0	0	0	0	0
189	68239.3	121.99	107.81	136.18	7.24	0	0	0	0	0	0	0	0	0	0	0	0	0	0	0	0	0	0	0	0	0	0	0	0	0	0	0	0	0	0	0	0	0	0	0	0	0	0	0
190	68600.4	122.15	107.9	136.4	7.27	0	0	0	0	0	0	0	0	0	0	0	0	0	0	0	0	0	0	0	0	0	0	0	0	0	0	0	0	0	0	0	0	0	0	0	0	0	0	0
191	68961.4	122.31	108	136.62	7.3	0	0	0	0	0	0	0	0	0	0	0	0	0	0	0	0	0	0	0	0	0	0	0	0	0	0	0	0	0	0	0	0	0	0	0	0	0	0	0
192	69322.5	122.47	108.1	136.84	7.33	0	0	0	0	0	0	0	0	0	0	0	0	0	0	0	0	0	0	0	0	0	0	0	0	0	0	0	0	0	0	0	0	0	0	0	0	0	0	0
193	69683.5	122.63	108.19	137.06	7.37	0	0	0	0	0	0	0	0	0	0	0	0	0	0	0	0	0	0	0	0	0	0	0	0	0	0	0	0	0	0	0	0	0	0	0	0	0	0	0
194	70044.6	122.78	108.28	137.28	7.4	0	0	0	0	0	0	0	0	0	0	0	0	0	0	0	0	0	0	0	0	0	0	0	0	0	0	0	0	0	0	0	0	0	0	0	0	0	0	0
195	70405.6	122.94	108.37	137.5	7.43	0	0	0	0	0	0	0	0	0	0	0	0	0	0	0	0	0	0	0	0	0	0	0	0	0	0	0	0	0	0	0	0	0	0	0	0	0	0	0
196	70766.7	123.09	108.46	137.72	7.46	0	0	0	0	0	0	0	0	0	0	0	0	0	0	0	0	0	0	0	0	0	0	0	0	0	0	0	0	0	0	0	0	0	0	0	0	0	0	0
197	71127.8	123.24	108.55	137.94	7.5	0	0	0	0	0	0	0	0	0	0	0	0	0	0	0	0	0	0	0	0	0	0	0	0	0	0	0	0	0	0	0	0	0	0	0	0	0	0	0
198	71488.8	123.39	108.64	138.15	7.53	0	0	0	0	0	0	0	0	0	0	0	0	0	0	0	0	0	0	0	0	0	0	0	0	0	0	0	0	0	0	0	0	0	0	0	0	0	0	0
199	71849.9	123.54	108.72	138.37	7.56	0	0	0	0	0	0	0	0	0	0	0	0	0	0	0	0	0	0	0	0	0	0	0	0	0	0	0	0	0	0	0	0	0	0	0	0	0	0	0
200	72210.9	123.69	108.81	138.58	7.6	0	0	0	0	0	0	0	0	0	0	0	0	0	0	0	0	0	0	0	0	0	0	0	0	0	0	0	0	0	0	0	0	0	0	0	0	0	0	0
201	72572	123.84	108.89	138.79	7.63	0	0	0	0	0	0	0	0	0	0	0	0	0	0	0	0	0	0	0	0	0	0	0	0	0	0	0	0	0	0	0	0	0	0	0	0	0	0	0
202	72933	123.99	108.97	139.01	7.66	0	0	0	0	0	0	0	0	0	0	0	0	0	0	0	0	0	0	0	0	0	0	0	0	0	0	0	0	0	0	0	0	0	0	0	0	0	0	0
203	73294.1	124.13	109.05	139.22	7.7	0	0	0	0	0	0	0	0	0	0	0	0	0	0	0	0	0	0	0	0	0	0	0	0	0	0	0	0	0	0	0	0	0	0	0	0	0	0	0
204	73655.1	124.28	109.13	139.43	7.73	0	0	0	0	0	0	0	0	0	0	0	0	0	0	0	0	0	0	0	0	0	0	0	0	0	0	0	0	0	0	0	0	0	0	0	0	0	0	0
205	74016.2	124.42	109.21	139.64	7.76	0	0	0	0	0	0	0	0	0	0	0	0	0	0	0	0	0	0	0	0	0	0	0	0	0	0	0	0	0	0	0	0	0	0	0	0	0	0	0
206	74377.2	124.57	109.28	139.85	7.8	0	0	0	0	0	0	0	0	0	0	0	0	0	0	0	0	0	0	0	0	0	0	0	0	0	0	0	0	0	0	0	0	0	0	0	0	0	0	0
207	74738.3	124.71	109.36	140.06	7.83	0	0	0	0	0	0	0	0	0	0	0	0	0	0	0	0	0	0	0	0	0	0	0	0	0	0	0	0	0	0	0	0	0	0	0	0	0	0	0
208	75099.4	124.85	109.43	140.26	7.86	0	0	0	0	0	0	0	0	0	0	0	0	0	0	0	0	0	0	0	0	0	0	0	0	0	0	0	0	0	0	0	0	0	0	0	0	0	0	0
209	75460.4	124.99	109.51	140.47	7.9	0	0	0	0	0	0	0	0	0	0	0	0	0	0	0	0	0	0	0	0	0	0	0	0	0	0	0	0	0	0	0	0	0	0	0	0	0	0	0
210	75821.4	125.13	109.58	140.68	7.93	0	0	0	0	0	0	0	0	0	0	0	0	0	0	0	0	0	0	0	0	0	0	0	0	0	0	0	0	0	0	0	0	0	0	0	0	0	0	0
211	76182.5	125.26	109.65	140.88	7.97	0	0	0	0	0	0	0	0	0	0	0	0	0	0	0	0	0	0	0	0	0	0	0	0	0	0	0	0	0	0	0	0	0	0	0	0	0	0	0
212	76543.6	125.4	109.72	141.08	8	0	0	0	0	0	0	0	0	0	0	0	0	0	0	0	0	0	0	0	0	0	0	0	0	0	0	0	0	0	0	0	0	0	0	0	0	0	0	0
213	76904.6	125.54	109.79	141.29	8.04	0	0	0	0	0	0	0	0	0	0	0	0	0	0	0	0	0	0	0	0	0	0	0	0	0	0	0	0	0	0	0	0	0	0	0	0	0	0	0
214	77265.7	125.67	109.85	141.49	8.07	0	0	0	0	0	0	0	0	0	0	0	0	0	0	0	0	0	0	0	0	0	0	0	0	0	0	0	0	0	0	0	0	0	0	0	0	0	0	0
215	77626.7	125.81	109.92	141.69	8.11	0	0	0	0	0	0	0	0	0	0	0	0	0	0	0	0	0	0	0	0	0	0	0	0	0	0	0	0	0	0	0	0	0	0	0	0	0	0	0
216	77987.8	125.94	109.99	141.89	8.14	0	0	0	0	0	0	0	0	0	0	0	0	0	0	0	0	0	0	0	0	0	0	0	0	0	0	0	0	0	0	0	0	0	0	0	0	0	0	0
217	78348.8	126.07	110.05	142.09	8.17	0	0	0	0	0	0	0	0	0	0	0	0	0	0	0	0	0	0	0	0	0	0	0	0	0	0	0	0	0	0	0	0	0	0	0	0	0	0	0
218	78709.9	126.2	110.11	142.29	8.21	0	0	0	0	0	0	0	0	0	0	0	0	0	0	0	0	0	0	0	0	0	0	0	0	0	0	0	0	0	0	0	0	0	0	0	0	0	0	0
219	79070.9	126.33	110.17	142.49	8.24	0	0	0	0	0	0	0	0	0	0	0	0	0	0	0	0	0	0	0	0	0	0	0	0	0	0	0	0	0	0	0	0	0	0	0	0	0	0	0
220	79432	126.46	110.24	142.69	8.28	0	0	0	0	0	0	0	0	0	0	0	0	0	0	0	0	0	0	0	0	0	0	0	0	0	0	0	0	0	0	0	0	0	0	0	0	0	0	0
221	79793.1	126.59	110.3	142.89	8.31	0	0	0	0	0	0	0	0	0	0	0	0	0	0	0	0	0	0	0	0	0	0	0	0	0	0	0	0	0	0	0	0	0	0	0	0	0	0	0
222	80154.1	126.72	110.35	143.08	8.35	0	0	0	0	0	0	0	0	0	0	0	0	0	0	0	0	0	0	0	0	0	0	0	0	0	0	0	0	0	0	0	0	0	0	0	0	0	0	0
223	80515.2	126.85	110.41	143.28	8.38	0	0	0	0	0	0	0	0	0	0	0	0	0	0	0	0	0	0	0	0	0	0	0	0	0	0	0	0	0	0	0	0	0	0	0	0	0	0	0
224	80876.2	126.97	110.47	143.47	8.42	0	0	0	0	0	0	0	0	0	0	0	0	0	0	0	0	0	0	0	0	0	0	0	0	0	0	0	0	0	0	0	0	0	0	0	0	0	0	0
225	81237.3	127.1	110.52	143.67	8.45	0	0	0	0	0	0	0	0	0	0	0	0	0	0	0	0	0	0	0	0	0	0	0	0	0	0	0	0	0	0	0	0	0	0	0	0	0	0	0
226	81598.3	127.22	110.58	143.86	8.49	0	0	0	0	0	0	0	0	0	0	0	0	0	0	0	0	0	0	0	0	0	0	0	0	0	0	0	0	0	0	0	0	0	0	0	0	0	0	0
227	81959.4	127.34	110.63	144.05	8.53	0	0	0	0	0	0	0	0	0	0	0	0	0	0	0	0	0	0	0	0	0	0	0	0	0	0	0	0	0	0	0	0	0	0	0	0	0	0	0
228	82320.4	127.47	110.69	144.24	8.56	0	0	0	0	0	0	0	0	0	0	0	0	0	0	0	0	0	0	0	0	0	0	0	0	0	0	0	0	0	0	0	0	0	0	0	0	0	0	0
229	82681.5	127.59	110.74	144.44	8.6	0	0	0	0	0	0	0	0	0	0	0	0	0	0	0	0	0	0	0	0	0	0	0	0	0	0	0	0	0	0	0	0	0	0	0	0	0	0	0
230	83042.6	127.71	110.79	144.63	8.63	0	0	0	0	0	0	0	0	0	0	0	0	0	0	0	0	0	0	0	0	0	0	0	0	0	0	0	0	0	0	0	0	0	0	0	0	0	0	0
231	83403.6	127.83	110.84	144.81	8.67	0	0	0	0	0	0	0	0	0	0	0	0	0	0	0	0	0	0	0	0	0	0	0	0	0	0	0	0	0	0	0	0	0	0	0	0	0	0	0
232	83764.6	127.95	110.89	145	8.7	0	0	0	0	0	0	0	0	0	0	0	0	0	0	0	0	0	0	0	0	0	0	0	0	0	0	0	0	0	0	0	0	0	0	0	0	0	0	0
233	84125.7	128.06	110.94	145.19	8.74	0	0	0	0	0	0	0	0	0	0	0	0	0	0	0	0	0	0	0	0	0	0	0	0	0	0	0	0	0	0	0	0	0	0	0	0	0	0	0
234	84486.8	128.18	110.98	145.38	8.77	0	0	0	0	0	0	0	0	0	0	0	0	0	0	0	0	0	0	0	0	0	0	0	0	0	0	0	0	0	0	0	0	0	0	0	0	0	0	0
235	84847.8	128.3	111.03	145.56	8.81	0	0	0	0	0	0	0	0	0	0	0	0	0	0	0	0	0	0	0	0	0	0	0	0	0	0	0	0	0	0	0	0	0	0	0	0	0	0	0
236	85208.9	128.41	111.08	145.75	8.85	0	0	0	0	0	0	0	0	0	0	0	0	0	0	0	0	0	0	0	0	0	0	0	0	0	0	0	0	0	0	0	0	0	0	0	0	0	0	0
237	85569.9	128.53	111.12	145.93	8.88	0	0	0	0	0	0	0	0	0	0	0	0	0	0	0	0	0	0	0	0	0	0	0	0	0	0	0	0	0	0	0	0	0	0	0	0	0	0	0
238	85931	128.64	111.16	146.12	8.92	0	0	0	0	0	0	0	0	0	0	0	0	0	0	0	0	0	0	0	0	0	0	0	0	0	0	0	0	0	0	0	0	0	0	0	0	0	0	0
239	86292	128.75	111.21	146.3	8.95	0	0	0	0	0	0	0	0	0	0	0	0	0	0	0	0	0	0	0	0	0	0	0	0	0	0	0	0	0	0	0	0	0	0	0	0	0	0	0
240	86653.1	128.87	111.25	146.48	8.99	0	0	0	0	0	0	0	0	0	0	0	0	0	0	0	0	0	0	0	0	0	0	0	0	0	0	0	0	0	0	0	0	0	0	0	0	0	0	0
241	87014.1	128.98	111.29	146.67	9.02	0	0	0	0	0	0	0	0	0	0	0	0	0	0	0	0	0	0	0	0	0	0	0	0	0	0	0	0	0	0	0	0	0	0	0	0	0	0	0
242	87375.2	129.09	111.33	146.85	9.06	0	0	0	0	0	0	0	0	0	0	0	0	0	0	0	0	0	0	0	0	0	0	0	0	0	0	0	0	0	0	0	0	0	0	0	0	0	0	0
243	87736.2	129.2	111.37	147.03	9.1	0	0	0	0	0	0	0	0	0	0	0	0	0	0	0	0	0	0	0	0	0	0	0	0	0	0	0	0	0	0	0	0	0	0	0	0	0	0	0
244	88097.3	129.31	111.41	147.21	9.13	0	0	0	0	0	0	0	0	0	0	0	0	0	0	0	0	0	0	0	0	0	0	0	0	0	0	0	0	0	0	0	0	0	0	0	0	0	0	0
245	88458.4	129.42	111.45	147.38	9.17	0	0	0	0	0	0	0	0	0	0	0	0	0	0	0	0	0	0	0	0	0	0	0	0	0	0	0	0	0	0	0	0	0	0	0	0	0	0	0
246	88819.4	129.52	111.49	147.56	9.2	0	0	0	0	0	0	0	0	0	0	0	0	0	0	0	0	0	0	0	0	0	0	0	0	0	0	0	0	0	0	0	0	0	0	0	0	0	0	0
247	89180.5	129.63	111.52	147.74	9.24	0	0	0	0	0	0	0	0	0	0	0	0	0	0	0	0	0	0	0	0	0	0	0	0	0	0	0	0	0	0	0	0	0	0	0	0	0	0	0
248	89541.5	129.74	111.56	147.92	9.27	0	0	0	0	0	0	0	0	0	0	0	0	0	0	0	0	0	0	0	0	0	0	0	0	0	0	0	0	0	0	0	0	0	0	0	0	0	0	0
249	89902.6	129.84	111.59	148.09	9.31	0	0	0	0	0	0	0	0	0	0	0	0	0	0	0	0	0	0	0	0	0	0	0	0	0	0	0	0	0	0	0	0	0	0	0	0	0	0	0
250	90263.6	129.95	111.63	148.27	9.35	0	0	0	0	0	0	0	0	0	0	0	0	0	0	0	0	0	0	0	0	0	0	0	0	0	0	0	0	0	0	0	0	0	0	0	0	0	0	0
251	90624.7	130.05	111.66	148.44	9.38	0	0	0	0	0	0	0	0	0	0	0	0	0	0	0	0	0	0	0	0	0	0	0	0	0	0	0	0	0	0	0	0	0	0	0	0	0	0	0
252	90985.8	130.15	111.69	148.61	9.42	0	0	0	0	0	0	0	0	0	0	0	0	0	0	0	0	0	0	0	0	0	0	0	0	0	0	0	0	0	0	0	0	0	0	0	0	0	0	0
253	91346.8	130.26	111.73	148.79	9.45	0	0	0	0	0	0	0	0	0	0	0	0	0	0	0	0	0	0	0	0	0	0	0	0	0	0	0	0	0	0	0	0	0	0	0	0	0	0	0
254	91707.9	130.36	111.76	148.96	9.49	0	0	0	0	0	0	0	0	0	0	0	0	0	0	0	0	0	0	0	0	0	0	0	0	0	0	0	0	0	0	0	0	0	0	0	0	0	0	0
255	92068.9	130.46	111.79	149.13	9.53	0	0	0	0	0	0	0	0	0	0	0	0	0	0	0	0	0	0	0	0	0	0	0	0	0	0	0	0	0	0	0	0	0	0	0	0	0	0	0
256	92430	130.56	111.82	149.3	9.56	0	0	0	0	0	0	0	0	0	0	0	0	0	0	0	0	0	0	0	0	0	0	0	0	0	0	0	0	0	0	0	0	0	0	0	0	0	0	0
257	92791	130.66	111.85	149.47	9.6	0	0	0	0	0	0	0	0	0	0	0	0	0	0	0	0	0	0	0	0	0	0	0	0	0	0	0	0	0	0	0	0	0	0	0	0	0	0	0
258	93152.1	130.76	111.88	149.64	9.63	0	0	0	0	0	0	0	0	0	0	0	0	0	0	0	0	0	0	0	0	0	0	0	0	0	0	0	0	0	0	0	0	0	0	0	0	0	0	0
259	93513.1	130.86	111.9	149.81	9.67	0	0	0	0	0	0	0	0	0	0	0	0	0	0	0	0	0	0	0	0	0	0	0	0	0	0	0	0	0	0	0	0	0	0	0	0	0	0	0
260	93874.2	130.95	111.93	149.98	9.71	0	0	0	0	0	0	0	0	0	0	0	0	0	0	0	0	0	0	0	0	0	0	0	0	0	0	0	0	0	0	0	0	0	0	0	0	0	0	0
261	94235.2	131.05	111.96	150.14	9.74	0	0	0	0	0	0	0	0	0	0	0	0	0	0	0	0	0	0	0	0	0	0	0	0	0	0	0	0	0	0	0	0	0	0	0	0	0	0	0
262	94596.3	131.15	111.98	150.31	9.78	0	0	0	0	0	0	0	0	0	0	0	0	0	0	0	0	0	0	0	0	0	0	0	0	0	0	0	0	0	0	0	0	0	0	0	0	0	0	0
263	94957.4	131.24	112.01	150.47	9.81	0	0	0	0	0	0	0	0	0	0	0	0	0	0	0	0	0	0	0	0	0	0	0	0	0	0	0	0	0	0	0	0	0	0	0	0	0	0	0
264	95318.4	131.34	112.03	150.64	9.85	0	0	0	0	0	0	0	0	0	0	0	0	0	0	0	0	0	0	0	0	0	0	0	0	0	0	0	0	0	0	0	0	0	0	0	0	0	0	0
265	95679.4	131.43	112.06	150.8	9.88	0	0	0	0	0	0	0	0	0	0	0	0	0	0	0	0	0	0	0	0	0	0	0	0	0	0	0	0	0	0	0	0	0	0	0	0	0	0	0
266	96040.5	131.52	112.08	150.97	9.92	0	0	0	0	0	0	0	0	0	0	0	0	0	0	0	0	0	0	0	0	0	0	0	0	0	0	0	0	0	0	0	0	0	0	0	0	0	0	0
267	96401.6	131.62	112.11	151.13	9.95	0	0	0	0	0	0	0	0	0	0	0	0	0	0	0	0	0	0	0	0	0	0	0	0	0	0	0	0	0	0	0	0	0	0	0	0	0	0	0
268	96762.6	131.71	112.13	151.29	9.99	0	0	0	0	0	0	0	0	0	0	0	0	0	0	0	0	0	0	0	0	0	0	0	0	0	0	0	0	0	0	0	0	0	0	0	0	0	0	0
269	97123.7	131.8	112.15	151.45	10.03	0	0	0	0	0	0	0	0	0	0	0	0	0	0	0	0	0	0	0	0	0	0	0	0	0	0	0	0	0	0	0	0	0	0	0	0	0	0	0
270	97484.7	131.89	112.17	151.61	10.06	0	0	0	0	0	0	0	0	0	0	0	0	0	0	0	0	0	0	0	0	0	0	0	0	0	0	0	0	0	0	0	0	0	0	0	0	0	0	0
271	97845.8	131.98	112.19	151.77	10.1	0	0	0	0	0	0	0	0	0	0	0	0	0	0	0	0	0	0	0	0	0	0	0	0	0	0	0	0	0	0	0	0	0	0	0	0	0	0	0
272	98206.8	132.07	112.21	151.93	10.13	0	0	0	0	0	0	0	0	0	0	0	0	0	0	0	0	0	0	0	0	0	0	0	0	0	0	0	0	0	0	0	0	0	0	0	0	0	0	0
273	98567.9	132.16	112.23	152.09	10.17	0	0	0	0	0	0	0	0	0	0	0	0	0	0	0	0	0	0	0	0	0	0	0	0	0	0	0	0	0	0	0	0	0	0	0	0	0	0	0
274	98928.9	132.25	112.25	152.25	10.2	0	0	0	0	0	0	0	0	0	0	0	0	0	0	0	0	0	0	0	0	0	0	0	0	0	0	0	0	0	0	0	0	0	0	0	0	0	0	0
275	99290	132.34	112.27	152.4	10.24	0	0	0	0	0	0	0	0	0	0	0	0	0	0	0	0	0	0	0	0	0	0	0	0	0	0	0	0	0	0	0	0	0	0	0	0	0	0	0
276	99651.1	132.42	112.29	152.56	10.27	0	0	0	0	0	0	0	0	0	0	0	0	0	0	0	0	0	0	0	0	0	0	0	0	0	0	0	0	0	0	0	0	0	0	0	0	0	0	0
277	100012	132.51	112.3	152.72	10.31	0	0	0	0	0	0	0	0	0	0	0	0	0	0	0	0	0	0	0	0	0	0	0	0	0	0	0	0	0	0	0	0	0	0	0	0	0	0	0
278	100373	132.6	112.32	152.87	10.34	0	0	0	0	0	0	0	0	0	0	0	0	0	0	0	0	0	0	0	0	0	0	0	0	0	0	0	0	0	0	0	0	0	0	0	0	0	0	0
279	100734	132.68	112.34	153.03	10.38	0	0	0	0	0	0	0	0	0	0	0	0	0	0	0	0	0	0	0	0	0	0	0	0	0	0	0	0	0	0	0	0	0	0	0	0	0	0	0
280	101095	132.77	112.35	153.18	10.42	0	0	0	0	0	0	0	0	0	0	0	0	0	0	0	0	0	0	0	0	0	0	0	0	0	0	0	0	0	0	0	0	0	0	0	0	0	0	0
281	101456	132.85	112.37	153.33	10.45	0	0	0	0	0	0	0	0	0	0	0	0	0	0	0	0	0	0	0	0	0	0	0	0	0	0	0	0	0	0	0	0	0	0	0	0	0	0	0
282	101817	132.93	112.38	153.48	10.49	0	0	0	0	0	0	0	0	0	0	0	0	0	0	0	0	0	0	0	0	0	0	0	0	0	0	0	0	0	0	0	0	0	0	0	0	0	0	0
283	102178	133.02	112.4	153.63	10.52	0	0	0	0	0	0	0	0	0	0	0	0	0	0	0	0	0	0	0	0	0	0	0	0	0	0	0	0	0	0	0	0	0	0	0	0	0	0	0
284	102539	133.1	112.41	153.79	10.56	0	0	0	0	0	0	0	0	0	0	0	0	0	0	0	0	0	0	0	0	0	0	0	0	0	0	0	0	0	0	0	0	0	0	0	0	0	0	0
285	102901	133.18	112.42	153.94	10.59	0	0	0	0	0	0	0	0	0	0	0	0	0	0	0	0	0	0	0	0	0	0	0	0	0	0	0	0	0	0	0	0	0	0	0	0	0	0	0
286	103262	133.26	112.44	154.09	10.62	0	0	0	0	0	0	0	0	0	0	0	0	0	0	0	0	0	0	0	0	0	0	0	0	0	0	0	0	0	0	0	0	0	0	0	0	0	0	0
287	103623	133.34	112.45	154.23	10.66	0	0	0	0	0	0	0	0	0	0	0	0	0	0	0	0	0	0	0	0	0	0	0	0	0	0	0	0	0	0	0	0	0	0	0	0	0	0	0
288	103984	133.42	112.46	154.38	10.69	0	0	0	0	0	0	0	0	0	0	0	0	0	0	0	0	0	0	0	0	0	0	0	0	0	0	0	0	0	0	0	0	0	0	0	0	0	0	0
289	104345	133.5	112.47	154.53	10.73	0	0	0	0	0	0	0	0	0	0	0	0	0	0	0	0	0	0	0	0	0	0	0	0	0	0	0	0	0	0	0	0	0	0	0	0	0	0	0
290	104706	133.58	112.48	154.68	10.76	0	0	0	0	0	0	0	0	0	0	0	0	0	0	0	0	0	0	0	0	0	0	0	0	0	0	0	0	0	0	0	0	0	0	0	0	0	0	0
291	105067	133.66	112.49	154.82	10.8	0	0	0	0	0	0	0	0	0	0	0	0	0	0	0	0	0	0	0	0	0	0	0	0	0	0	0	0	0	0	0	0	0	0	0	0	0	0	0
292	105428	133.74	112.5	154.97	10.83	0	0	0	0	0	0	0	0	0	0	0	0	0	0	0	0	0	0	0	0	0	0	0	0	0	0	0	0	0	0	0	0	0	0	0	0	0	0	0
293	105789	133.81	112.51	155.11	10.87	0	0	0	0	0	0	0	0	0	0	0	0	0	0	0	0	0	0	0	0	0	0	0	0	0	0	0	0	0	0	0	0	0	0	0	0	0	0	0
294	106150	133.89	112.52	155.26	10.9	0	0	0	0	0	0	0	0	0	0	0	0	0	0	0	0	0	0	0	0	0	0	0	0	0	0	0	0	0	0	0	0	0	0	0	0	0	0	0
295	106511	133.96	112.53	155.4	10.94	0	0	0	0	0	0	0	0	0	0	0	0	0	0	0	0	0	0	0	0	0	0	0	0	0	0	0	0	0	0	0	0	0	0	0	0	0	0	0
296	106872	134.04	112.54	155.54	10.97	0	0	0	0	0	0	0	0	0	0	0	0	0	0	0	0	0	0	0	0	0	0	0	0	0	0	0	0	0	0	0	0	0	0	0	0	0	0	0
297	107233	134.12	112.55	155.68	11	0	0	0	0	0	0	0	0	0	0	0	0	0	0	0	0	0	0	0	0	0	0	0	0	0	0	0	0	0	0	0	0	0	0	0	0	0	0	0
298	107594	134.19	112.55	155.83	11.04	0	0	0	0	0	0	0	0	0	0	0	0	0	0	0	0	0	0	0	0	0	0	0	0	0	0	0	0	0	0	0	0	0	0	0	0	0	0	0
299	107955	134.26	112.56	155.97	11.07	0	0	0	0	0	0	0	0	0	0	0	0	0	0	0	0	0	0	0	0	0	0	0	0	0	0	0	0	0	0	0	0	0	0	0	0	0	0	0
300	108316	134.34	112.57	156.11	11.11	0	0	0	0	0	0	0	0	0	0	0	0	0	0	0	0	0	0	0	0	0	0	0	0	0	0	0	0	0	0	0	0	0	0	0	0	0	0	0
301	108677	134.41	112.57	156.25	11.14	0	0	0	0	0	0	0	0	0	0	0	0	0	0	0	0	0	0	0	0	0	0	0	0	0	0	0	0	0	0	0	0	0	0	0	0	0	0	0
302	109038	134.48	112.58	156.39	11.17	0	0	0	0	0	0	0	0	0	0	0	0	0	0	0	0	0	0	0	0	0	0	0	0	0	0	0	0	0	0	0	0	0	0	0	0	0	0	0
303	109400	134.55	112.59	156.52	11.21	0	0	0	0	0	0	0	0	0	0	0	0	0	0	0	0	0	0	0	0	0	0	0	0	0	0	0	0	0	0	0	0	0	0	0	0	0	0	0
304	109761	134.63	112.59	156.66	11.24	0	0	0	0	0	0	0	0	0	0	0	0	0	0	0	0	0	0	0	0	0	0	0	0	0	0	0	0	0	0	0	0	0	0	0	0	0	0	0
305	110122	134.7	112.6	156.8	11.28	0	0	0	0	0	0	0	0	0	0	0	0	0	0	0	0	0	0	0	0	0	0	0	0	0	0	0	0	0	0	0	0	0	0	0	0	0	0	0
306	110483	134.77	112.6	156.93	11.31	0	0	0	0	0	0	0	0	0	0	0	0	0	0	0	0	0	0	0	0	0	0	0	0	0	0	0	0	0	0	0	0	0	0	0	0	0	0	0
307	110844	134.84	112.6	157.07	11.34	0	0	0	0	0	0	0	0	0	0	0	0	0	0	0	0	0	0	0	0	0	0	0	0	0	0	0	0	0	0	0	0	0	0	0	0	0	0	0
308	111205	134.91	112.61	157.21	11.38	0	0	0	0	0	0	0	0	0	0	0	0	0	0	0	0	0	0	0	0	0	0	0	0	0	0	0	0	0	0	0	0	0	0	0	0	0	0	0
309	111566	134.98	112.61	157.34	11.41	0	0	0	0	0	0	0	0	0	0	0	0	0	0	0	0	0	0	0	0	0	0	0	0	0	0	0	0	0	0	0	0	0	0	0	0	0	0	0
310	111927	135.04	112.61	157.47	11.44	0	0	0	0	0	0	0	0	0	0	0	0	0	0	0	0	0	0	0	0	0	0	0	0	0	0	0	0	0	0	0	0	0	0	0	0	0	0	0
311	112288	135.11	112.62	157.61	11.48	0	0	0	0	0	0	0	0	0	0	0	0	0	0	0	0	0	0	0	0	0	0	0	0	0	0	0	0	0	0	0	0	0	0	0	0	0	0	0
312	112649	135.18	112.62	157.74	11.51	0	0	0	0	0	0	0	0	0	0	0	0	0	0	0	0	0	0	0	0	0	0	0	0	0	0	0	0	0	0	0	0	0	0	0	0	0	0	0
313	113010	135.25	112.62	157.87	11.54	0	0	0	0	0	0	0	0	0	0	0	0	0	0	0	0	0	0	0	0	0	0	0	0	0	0	0	0	0	0	0	0	0	0	0	0	0	0	0
314	113371	135.31	112.62	158	11.58	0	0	0	0	0	0	0	0	0	0	0	0	0	0	0	0	0	0	0	0	0	0	0	0	0	0	0	0	0	0	0	0	0	0	0	0	0	0	0
315	113732	135.38	112.62	158.13	11.61	0	0	0	0	0	0	0	0	0	0	0	0	0	0	0	0	0	0	0	0	0	0	0	0	0	0	0	0	0	0	0	0	0	0	0	0	0	0	0
316	114093	135.44	112.63	158.26	11.64	0	0	0	0	0	0	0	0	0	0	0	0	0	0	0	0	0	0	0	0	0	0	0	0	0	0	0	0	0	0	0	0	0	0	0	0	0	0	0
317	114454	135.51	112.63	158.39	11.68	0	0	0	0	0	0	0	0	0	0	0	0	0	0	0	0	0	0	0	0	0	0	0	0	0	0	0	0	0	0	0	0	0	0	0	0	0	0	0
318	114815	135.57	112.63	158.52	11.71	0	0	0	0	0	0	0	0	0	0	0	0	0	0	0	0	0	0	0	0	0	0	0	0	0	0	0	0	0	0	0	0	0	0	0	0	0	0	0
319	115176	135.64	112.63	158.65	11.74	0	0	0	0	0	0	0	0	0	0	0	0	0	0	0	0	0	0	0	0	0	0	0	0	0	0	0	0	0	0	0	0	0	0	0	0	0	0	0
320	115537	135.7	112.63	158.78	11.77	0	0	0	0	0	0	0	0	0	0	0	0	0	0	0	0	0	0	0	0	0	0	0	0	0	0	0	0	0	0	0	0	0	0	0	0	0	0	0
321	115899	135.77	112.63	158.9	11.81	0	0	0	0	0	0	0	0	0	0	0	0	0	0	0	0	0	0	0	0	0	0	0	0	0	0	0	0	0	0	0	0	0	0	0	0	0	0	0
322	116260	135.83	112.63	159.03	11.84	0	0	0	0	0	0	0	0	0	0	0	0	0	0	0	0	0	0	0	0	0	0	0	0	0	0	0	0	0	0	0	0	0	0	0	0	0	0	0
323	116621	135.89	112.62	159.16	11.87	0	0	0	0	0	0	0	0	0	0	0	0	0	0	0	0	0	0	0	0	0	0	0	0	0	0	0	0	0	0	0	0	0	0	0	0	0	0	0
324	116982	135.95	112.62	159.28	11.9	0	0	0	0	0	0	0	0	0	0	0	0	0	0	0	0	0	0	0	0	0	0	0	0	0	0	0	0	0	0	0	0	0	0	0	0	0	0	0
325	117343	136.01	112.62	159.41	11.93	0	0	0	0	0	0	0	0	0	0	0	0	0	0	0	0	0	0	0	0	0	0	0	0	0	0	0	0	0	0	0	0	0	0	0	0	0	0	0
326	117704	136.08	112.62	159.53	11.97	0	0	0	0	0	0	0	0	0	0	0	0	0	0	0	0	0	0	0	0	0	0	0	0	0	0	0	0	0	0	0	0	0	0	0	0	0	0	0
327	118065	136.14	112.62	159.65	12	0	0	0	0	0	0	0	0	0	0	0	0	0	0	0	0	0	0	0	0	0	0	0	0	0	0	0	0	0	0	0	0	0	0	0	0	0	0	0
328	118426	136.2	112.62	159.78	12.03	0	0	0	0	0	0	0	0	0	0	0	0	0	0	0	0	0	0	0	0	0	0	0	0	0	0	0	0	0	0	0	0	0	0	0	0	0	0	0
329	118787	136.26	112.61	159.9	12.06	0	0	0	0	0	0	0	0	0	0	0	0	0	0	0	0	0	0	0	0	0	0	0	0	0	0	0	0	0	0	0	0	0	0	0	0	0	0	0
330	119148	136.32	112.61	160.02	12.09	0	0	0	0	0	0	0	0	0	0	0	0	0	0	0	0	0	0	0	0	0	0	0	0	0	0	0	0	0	0	0	0	0	0	0	0	0	0	0
331	119509	136.37	112.61	160.14	12.13	0	0	0	0	0	0	0	0	0	0	0	0	0	0	0	0	0	0	0	0	0	0	0	0	0	0	0	0	0	0	0	0	0	0	0	0	0	0	0
332	119870	136.43	112.6	160.26	12.16	0	0	0	0	0	0	0	0	0	0	0	0	0	0	0	0	0	0	0	0	0	0	0	0	0	0	0	0	0	0	0	0	0	0	0	0	0	0	0
333	120231	136.49	112.6	160.38	12.19	0	0	0	0	0	0	0	0	0	0	0	0	0	0	0	0	0	0	0	0	0	0	0	0	0	0	0	0	0	0	0	0	0	0	0	0	0	0	0
334	120592	136.55	112.6	160.5	12.22	0	0	0	0	0	0	0	0	0	0	0	0	0	0	0	0	0	0	0	0	0	0	0	0	0	0	0	0	0	0	0	0	0	0	0	0	0	0	0
335	120953	136.61	112.59	160.62	12.25	0	0	0	0	0	0	0	0	0	0	0	0	0	0	0	0	0	0	0	0	0	0	0	0	0	0	0	0	0	0	0	0	0	0	0	0	0	0	0
336	121314	136.66	112.59	160.74	12.28	0	0	0	0	0	0	0	0	0	0	0	0	0	0	0	0	0	0	0	0	0	0	0	0	0	0	0	0	0	0	0	0	0	0	0	0	0	0	0
337	121675	136.72	112.58	160.86	12.31	0	0	0	0	0	0	0	0	0	0	0	0	0	0	0	0	0	0	0	0	0	0	0	0	0	0	0	0	0	0	0	0	0	0	0	0	0	0	0
338	122036	136.78	112.58	160.97	12.35	0	0	0	0	0	0	0	0	0	0	0	0	0	0	0	0	0	0	0	0	0	0	0	0	0	0	0	0	0	0	0	0	0	0	0	0	0	0	0
339	122397	136.83	112.57	161.09	12.38	0	0	0	0	0	0	0	0	0	0	0	0	0	0	0	0	0	0	0	0	0	0	0	0	0	0	0	0	0	0	0	0	0	0	0	0	0	0	0
340	122759	136.89	112.57	161.21	12.41	0	0	0	0	0	0	0	0	0	0	0	0	0	0	0	0	0	0	0	0	0	0	0	0	0	0	0	0	0	0	0	0	0	0	0	0	0	0	0
341	123120	136.94	112.56	161.32	12.44	0	0	0	0	0	0	0	0	0	0	0	0	0	0	0	0	0	0	0	0	0	0	0	0	0	0	0	0	0	0	0	0	0	0	0	0	0	0	0
342	123481	137	112.56	161.44	12.47	0	0	0	0	0	0	0	0	0	0	0	0	0	0	0	0	0	0	0	0	0	0	0	0	0	0	0	0	0	0	0	0	0	0	0	0	0	0	0
343	123842	137.05	112.55	161.55	12.5	0	0	0	0	0	0	0	0	0	0	0	0	0	0	0	0	0	0	0	0	0	0	0	0	0	0	0	0	0	0	0	0	0	0	0	0	0	0	0
344	124203	137.1	112.54	161.66	12.53	0	0	0	0	0	0	0	0	0	0	0	0	0	0	0	0	0	0	0	0	0	0	0	0	0	0	0	0	0	0	0	0	0	0	0	0	0	0	0
345	124564	137.16	112.54	161.78	12.56	0	0	0	0	0	0	0	0	0	0	0	0	0	0	0	0	0	0	0	0	0	0	0	0	0	0	0	0	0	0	0	0	0	0	0	0	0	0	0
346	124925	137.21	112.53	161.89	12.59	0	0	0	0	0	0	0	0	0	0	0	0	0	0	0	0	0	0	0	0	0	0	0	0	0	0	0	0	0	0	0	0	0	0	0	0	0	0	0
347	125286	137.26	112.53	162	12.62	0	0	0	0	0	0	0	0	0	0	0	0	0	0	0	0	0	0	0	0	0	0	0	0	0	0	0	0	0	0	0	0	0	0	0	0	0	0	0
348	125647	137.32	112.52	162.11	12.65	0	0	0	0	0	0	0	0	0	0	0	0	0	0	0	0	0	0	0	0	0	0	0	0	0	0	0	0	0	0	0	0	0	0	0	0	0	0	0
349	126008	137.37	112.51	162.22	12.68	0	0	0	0	0	0	0	0	0	0	0	0	0	0	0	0	0	0	0	0	0	0	0	0	0	0	0	0	0	0	0	0	0	0	0	0	0	0	0
350	126369	137.42	112.5	162.33	12.71	0	0	0	0	0	0	0	0	0	0	0	0	0	0	0	0	0	0	0	0	0	0	0	0	0	0	0	0	0	0	0	0	0	0	0	0	0	0	0
351	126730	137.47	112.5	162.44	12.74	0	0	0	0	0	0	0	0	0	0	0	0	0	0	0	0	0	0	0	0	0	0	0	0	0	0	0	0	0	0	0	0	0	0	0	0	0	0	0
352	127091	137.52	112.49	162.55	12.77	0	0	0	0	0	0	0	0	0	0	0	0	0	0	0	0	0	0	0	0	0	0	0	0	0	0	0	0	0	0	0	0	0	0	0	0	0	0	0
353	127452	137.57	112.48	162.66	12.8	0	0	0	0	0	0	0	0	0	0	0	0	0	0	0	0	0	0	0	0	0	0	0	0	0	0	0	0	0	0	0	0	0	0	0	0	0	0	0
354	127813	137.62	112.47	162.77	12.83	0	0	0	0	0	0	0	0	0	0	0	0	0	0	0	0	0	0	0	0	0	0	0	0	0	0	0	0	0	0	0	0	0	0	0	0	0	0	0
355	128174	137.67	112.47	162.88	12.86	0	0	0	0	0	0	0	0	0	0	0	0	0	0	0	0	0	0	0	0	0	0	0	0	0	0	0	0	0	0	0	0	0	0	0	0	0	0	0
356	128535	137.72	112.46	162.99	12.89	0	0	0	0	0	0	0	0	0	0	0	0	0	0	0	0	0	0	0	0	0	0	0	0	0	0	0	0	0	0	0	0	0	0	0	0	0	0	0
357	128896	137.77	112.45	163.09	12.92	0	0	0	0	0	0	0	0	0	0	0	0	0	0	0	0	0	0	0	0	0	0	0	0	0	0	0	0	0	0	0	0	0	0	0	0	0	0	0
358	129258	137.82	112.44	163.2	12.95	0	0	0	0	0	0	0	0	0	0	0	0	0	0	0	0	0	0	0	0	0	0	0	0	0	0	0	0	0	0	0	0	0	0	0	0	0	0	0
359	129619	137.87	112.43	163.3	12.98	0	0	0	0	0	0	0	0	0	0	0	0	0	0	0	0	0	0	0	0	0	0	0	0	0	0	0	0	0	0	0	0	0	0	0	0	0	0	0
360	129980	137.92	112.42	163.41	13.01	0	0	0	0	0	0	0	0	0	0	0	0	0	0	0	0	0	0	0	0	0	0	0	0	0	0	0	0	0	0	0	0	0	0	0	0	0	0	0
361	130341	137.96	112.41	163.51	13.04	0	0	0	0	0	0	0	0	0	0	0	0	0	0	0	0	0	0	0	0	0	0	0	0	0	0	0	0	0	0	0	0	0	0	0	0	0	0	0
362	130702	138.01	112.4	163.62	13.06	0	0	0	0	0	0	0	0	0	0	0	0	0	0	0	0	0	0	0	0	0	0	0	0	0	0	0	0	0	0	0	0	0	0	0	0	0	0	0
363	131063	138.06	112.39	163.72	13.09	0	0	0	0	0	0	0	0	0	0	0	0	0	0	0	0	0	0	0	0	0	0	0	0	0	0	0	0	0	0	0	0	0	0	0	0	0	0	0
364	131424	138.1	112.38	163.82	13.12	0	0	0	0	0	0	0	0	0	0	0	0	0	0	0	0	0	0	0	0	0	0	0	0	0	0	0	0	0	0	0	0	0	0	0	0	0	0	0
365	131785	138.15	112.37	163.93	13.15	0	0	0	0	0	0	0	0	0	0	0	0	0	0	0	0	0	0	0	0	0	0	0	0	0	0	0	0	0	0	0	0	0	0	0	0	0	0	0
366	132146	138.2	112.36	164.03	13.18	0	0	0	0	0	0	0	0	0	0	0	0	0	0	0	0	0	0	0	0	0	0	0	0	0	0	0	0	0	0	0	0	0	0	0	0	0	0	0
367	132507	138.24	112.35	164.13	13.21	0	0	0	0	0	0	0	0	0	0	0	0	0	0	0	0	0	0	0	0	0	0	0	0	0	0	0	0	0	0	0	0	0	0	0	0	0	0	0
368	132868	138.29	112.34	164.23	13.24	0	0	0	0	0	0	0	0	0	0	0	0	0	0	0	0	0	0	0	0	0	0	0	0	0	0	0	0	0	0	0	0	0	0	0	0	0	0	0
369	133229	138.33	112.33	164.33	13.26	0	0	0	0	0	0	0	0	0	0	0	0	0	0	0	0	0	0	0	0	0	0	0	0	0	0	0	0	0	0	0	0	0	0	0	0	0	0	0
370	133590	138.38	112.32	164.43	13.29	0	0	0	0	0	0	0	0	0	0	0	0	0	0	0	0	0	0	0	0	0	0	0	0	0	0	0	0	0	0	0	0	0	0	0	0	0	0	0
371	133951	138.42	112.31	164.53	13.32	0	0	0	0	0	0	0	0	0	0	0	0	0	0	0	0	0	0	0	0	0	0	0	0	0	0	0	0	0	0	0	0	0	0	0	0	0	0	0
372	134312	138.47	112.3	164.63	13.35	0	0	0	0	0	0	0	0	0	0	0	0	0	0	0	0	0	0	0	0	0	0	0	0	0	0	0	0	0	0	0	0	0	0	0	0	0	0	0
373	134673	138.51	112.29	164.73	13.38	0	0	0	0	0	0	0	0	0	0	0	0	0	0	0	0	0	0	0	0	0	0	0	0	0	0	0	0	0	0	0	0	0	0	0	0	0	0	0
374	135034	138.55	112.28	164.83	13.4	0	0	0	0	0	0	0	0	0	0	0	0	0	0	0	0	0	0	0	0	0	0	0	0	0	0	0	0	0	0	0	0	0	0	0	0	0	0	0
375	135395	138.6	112.27	164.92	13.43	0	0	0	0	0	0	0	0	0	0	0	0	0	0	0	0	0	0	0	0	0	0	0	0	0	0	0	0	0	0	0	0	0	0	0	0	0	0	0
376	135757	138.64	112.26	165.02	13.46	0	0	0	0	0	0	0	0	0	0	0	0	0	0	0	0	0	0	0	0	0	0	0	0	0	0	0	0	0	0	0	0	0	0	0	0	0	0	0
377	136118	138.68	112.25	165.12	13.49	0	0	0	0	0	0	0	0	0	0	0	0	0	0	0	0	0	0	0	0	0	0	0	0	0	0	0	0	0	0	0	0	0	0	0	0	0	0	0
378	136479	138.72	112.24	165.21	13.51	0	0	0	0	0	0	0	0	0	0	0	0	0	0	0	0	0	0	0	0	0	0	0	0	0	0	0	0	0	0	0	0	0	0	0	0	0	0	0
379	136840	138.77	112.22	165.31	13.54	0	0	0	0	0	0	0	0	0	0	0	0	0	0	0	0	0	0	0	0	0	0	0	0	0	0	0	0	0	0	0	0	0	0	0	0	0	0	0
380	137201	138.81	112.21	165.4	13.57	0	0	0	0	0	0	0	0	0	0	0	0	0	0	0	0	0	0	0	0	0	0	0	0	0	0	0	0	0	0	0	0	0	0	0	0	0	0	0
381	137562	138.85	112.2	165.5	13.6	0	0	0	0	0	0	0	0	0	0	0	0	0	0	0	0	0	0	0	0	0	0	0	0	0	0	0	0	0	0	0	0	0	0	0	0	0	0	0
382	137923	138.89	112.19	165.59	13.62	0	0	0	0	0	0	0	0	0	0	0	0	0	0	0	0	0	0	0	0	0	0	0	0	0	0	0	0	0	0	0	0	0	0	0	0	0	0	0
383	138284	138.93	112.18	165.68	13.65	0	0	0	0	0	0	0	0	0	0	0	0	0	0	0	0	0	0	0	0	0	0	0	0	0	0	0	0	0	0	0	0	0	0	0	0	0	0	0
384	138645	138.97	112.17	165.78	13.68	0	0	0	0	0	0	0	0	0	0	0	0	0	0	0	0	0	0	0	0	0	0	0	0	0	0	0	0	0	0	0	0	0	0	0	0	0	0	0
385	139006	139.01	112.15	165.87	13.7	0	0	0	0	0	0	0	0	0	0	0	0	0	0	0	0	0	0	0	0	0	0	0	0	0	0	0	0	0	0	0	0	0	0	0	0	0	0	0
386	139367	139.05	112.14	165.96	13.73	0	0	0	0	0	0	0	0	0	0	0	0	0	0	0	0	0	0	0	0	0	0	0	0	0	0	0	0	0	0	0	0	0	0	0	0	0	0	0
387	139728	139.09	112.13	166.05	13.76	0	0	0	0	0	0	0	0	0	0	0	0	0	0	0	0	0	0	0	0	0	0	0	0	0	0	0	0	0	0	0	0	0	0	0	0	0	0	0
388	140089	139.13	112.12	166.15	13.78	0	0	0	0	0	0	0	0	0	0	0	0	0	0	0	0	0	0	0	0	0	0	0	0	0	0	0	0	0	0	0	0	0	0	0	0	0	0	0
389	140450	139.17	112.1	166.24	13.81	0	0	0	0	0	0	0	0	0	0	0	0	0	0	0	0	0	0	0	0	0	0	0	0	0	0	0	0	0	0	0	0	0	0	0	0	0	0	0
390	140811	139.21	112.09	166.33	13.84	0	0	0	0	0	0	0	0	0	0	0	0	0	0	0	0	0	0	0	0	0	0	0	0	0	0	0	0	0	0	0	0	0	0	0	0	0	0	0
391	141172	139.25	112.08	166.42	13.86	0	0	0	0	0	0	0	0	0	0	0	0	0	0	0	0	0	0	0	0	0	0	0	0	0	0	0	0	0	0	0	0	0	0	0	0	0	0	0
392	141533	139.29	112.07	166.51	13.89	0	0	0	0	0	0	0	0	0	0	0	0	0	0	0	0	0	0	0	0	0	0	0	0	0	0	0	0	0	0	0	0	0	0	0	0	0	0	0
393	141894	139.32	112.05	166.59	13.91	0	0	0	0	0	0	0	0	0	0	0	0	0	0	0	0	0	0	0	0	0	0	0	0	0	0	0	0	0	0	0	0	0	0	0	0	0	0	0
394	142255	139.36	112.04	166.68	13.94	0	0	0	0	0	0	0	0	0	0	0	0	0	0	0	0	0	0	0	0	0	0	0	0	0	0	0	0	0	0	0	0	0	0	0	0	0	0	0
395	142617	139.4	112.03	166.77	13.97	0	0	0	0	0	0	0	0	0	0	0	0	0	0	0	0	0	0	0	0	0	0	0	0	0	0	0	0	0	0	0	0	0	0	0	0	0	0	0
396	142978	139.44	112.01	166.86	13.99	0	0	0	0	0	0	0	0	0	0	0	0	0	0	0	0	0	0	0	0	0	0	0	0	0	0	0	0	0	0	0	0	0	0	0	0	0	0	0
397	143339	139.47	112	166.95	14.02	0	0	0	0	0	0	0	0	0	0	0	0	0	0	0	0	0	0	0	0	0	0	0	0	0	0	0	0	0	0	0	0	0	0	0	0	0	0	0
398	143700	139.51	111.99	167.03	14.04	0	0	0	0	0	0	0	0	0	0	0	0	0	0	0	0	0	0	0	0	0	0	0	0	0	0	0	0	0	0	0	0	0	0	0	0	0	0	0
399	144061	139.55	111.97	167.12	14.07	0	0	0	0	0	0	0	0	0	0	0	0	0	0	0	0	0	0	0	0	0	0	0	0	0	0	0	0	0	0	0	0	0	0	0	0	0	0	0
400	144422	139.58	111.96	167.2	14.09	0	0	0	0	0	0	0	0	0	0	0	0	0	0	0	0	0	0	0	0	0	0	0	0	0	0	0	0	0	0	0	0	0	0	0	0	0	0	0
401	144783	139.62	111.95	167.29	14.12	0	0	0	0	0	0	0	0	0	0	0	0	0	0	0	0	0	0	0	0	0	0	0	0	0	0	0	0	0	0	0	0	0	0	0	0	0	0	0
402	145144	139.65	111.93	167.37	14.14	0	0	0	0	0	0	0	0	0	0	0	0	0	0	0	0	0	0	0	0	0	0	0	0	0	0	0	0	0	0	0	0	0	0	0	0	0	0	0
403	145505	139.69	111.92	167.46	14.17	0	0	0	0	0	0	0	0	0	0	0	0	0	0	0	0	0	0	0	0	0	0	0	0	0	0	0	0	0	0	0	0	0	0	0	0	0	0	0
404	145866	139.72	111.91	167.54	14.19	0	0	0	0	0	0	0	0	0	0	0	0	0	0	0	0	0	0	0	0	0	0	0	0	0	0	0	0	0	0	0	0	0	0	0	0	0	0	0
405	146227	139.76	111.89	167.63	14.22	0	0	0	0	0	0	0	0	0	0	0	0	0	0	0	0	0	0	0	0	0	0	0	0	0	0	0	0	0	0	0	0	0	0	0	0	0	0	0
406	146588	139.79	111.88	167.71	14.24	0	0	0	0	0	0	0	0	0	0	0	0	0	0	0	0	0	0	0	0	0	0	0	0	0	0	0	0	0	0	0	0	0	0	0	0	0	0	0
407	146949	139.83	111.87	167.79	14.27	0	0	0	0	0	0	0	0	0	0	0	0	0	0	0	0	0	0	0	0	0	0	0	0	0	0	0	0	0	0	0	0	0	0	0	0	0	0	0
408	147310	139.86	111.85	167.87	14.29	0	0	0	0	0	0	0	0	0	0	0	0	0	0	0	0	0	0	0	0	0	0	0	0	0	0	0	0	0	0	0	0	0	0	0	0	0	0	0
409	147671	139.9	111.84	167.96	14.32	0	0	0	0	0	0	0	0	0	0	0	0	0	0	0	0	0	0	0	0	0	0	0	0	0	0	0	0	0	0	0	0	0	0	0	0	0	0	0
410	148032	139.93	111.82	168.04	14.34	0	0	0	0	0	0	0	0	0	0	0	0	0	0	0	0	0	0	0	0	0	0	0	0	0	0	0	0	0	0	0	0	0	0	0	0	0	0	0
411	148393	139.96	111.81	168.12	14.36	0	0	0	0	0	0	0	0	0	0	0	0	0	0	0	0	0	0	0	0	0	0	0	0	0	0	0	0	0	0	0	0	0	0	0	0	0	0	0
412	148754	140	111.8	168.2	14.39	0	0	0	0	0	0	0	0	0	0	0	0	0	0	0	0	0	0	0	0	0	0	0	0	0	0	0	0	0	0	0	0	0	0	0	0	0	0	0
413	149116	140.03	111.78	168.28	14.41	0	0	0	0	0	0	0	0	0	0	0	0	0	0	0	0	0	0	0	0	0	0	0	0	0	0	0	0	0	0	0	0	0	0	0	0	0	0	0
414	149477	140.06	111.77	168.36	14.44	0	0	0	0	0	0	0	0	0	0	0	0	0	0	0	0	0	0	0	0	0	0	0	0	0	0	0	0	0	0	0	0	0	0	0	0	0	0	0
415	149838	140.1	111.75	168.44	14.46	0	0	0	0	0	0	0	0	0	0	0	0	0	0	0	0	0	0	0	0	0	0	0	0	0	0	0	0	0	0	0	0	0	0	0	0	0	0	0
416	150199	140.13	111.74	168.52	14.48	0	0	0	0	0	0	0	0	0	0	0	0	0	0	0	0	0	0	0	0	0	0	0	0	0	0	0	0	0	0	0	0	0	0	0	0	0	0	0
417	150560	140.16	111.72	168.6	14.51	0	0	0	0	0	0	0	0	0	0	0	0	0	0	0	0	0	0	0	0	0	0	0	0	0	0	0	0	0	0	0	0	0	0	0	0	0	0	0
418	150921	140.19	111.71	168.67	14.53	0	0	0	0	0	0	0	0	0	0	0	0	0	0	0	0	0	0	0	0	0	0	0	0	0	0	0	0	0	0	0	0	0	0	0	0	0	0	0
419	151282	140.22	111.7	168.75	14.55	0	0	0	0	0	0	0	0	0	0	0	0	0	0	0	0	0	0	0	0	0	0	0	0	0	0	0	0	0	0	0	0	0	0	0	0	0	0	0
420	151643	140.26	111.68	168.83	14.58	0	0	0	0	0	0	0	0	0	0	0	0	0	0	0	0	0	0	0	0	0	0	0	0	0	0	0	0	0	0	0	0	0	0	0	0	0	0	0
421	152004	140.29	111.67	168.91	14.6	0	0	0	0	0	0	0	0	0	0	0	0	0	0	0	0	0	0	0	0	0	0	0	0	0	0	0	0	0	0	0	0	0	0	0	0	0	0	0
422	152365	140.32	111.65	168.98	14.62	0	0	0	0	0	0	0	0	0	0	0	0	0	0	0	0	0	0	0	0	0	0	0	0	0	0	0	0	0	0	0	0	0	0	0	0	0	0	0
423	152726	140.35	111.64	169.06	14.65	0	0	0	0	0	0	0	0	0	0	0	0	0	0	0	0	0	0	0	0	0	0	0	0	0	0	0	0	0	0	0	0	0	0	0	0	0	0	0
424	153087	140.38	111.62	169.13	14.67	0	0	0	0	0	0	0	0	0	0	0	0	0	0	0	0	0	0	0	0	0	0	0	0	0	0	0	0	0	0	0	0	0	0	0	0	0	0	0
425	153448	140.41	111.61	169.21	14.69	0	0	0	0	0	0	0	0	0	0	0	0	0	0	0	0	0	0	0	0	0	0	0	0	0	0	0	0	0	0	0	0	0	0	0	0	0	0	0
426	153809	140.44	111.59	169.28	14.72	0	0	0	0	0	0	0	0	0	0	0	0	0	0	0	0	0	0	0	0	0	0	0	0	0	0	0	0	0	0	0	0	0	0	0	0	0	0	0
427	154170	140.47	111.58	169.36	14.74	0	0	0	0	0	0	0	0	0	0	0	0	0	0	0	0	0	0	0	0	0	0	0	0	0	0	0	0	0	0	0	0	0	0	0	0	0	0	0
428	154531	140.5	111.56	169.43	14.76	0	0	0	0	0	0	0	0	0	0	0	0	0	0	0	0	0	0	0	0	0	0	0	0	0	0	0	0	0	0	0	0	0	0	0	0	0	0	0
429	154892	140.53	111.55	169.51	14.78	0	0	0	0	0	0	0	0	0	0	0	0	0	0	0	0	0	0	0	0	0	0	0	0	0	0	0	0	0	0	0	0	0	0	0	0	0	0	0
430	155253	140.56	111.54	169.58	14.81	0	0	0	0	0	0	0	0	0	0	0	0	0	0	0	0	0	0	0	0	0	0	0	0	0	0	0	0	0	0	0	0	0	0	0	0	0	0	0
431	155615	140.59	111.52	169.65	14.83	0	0	0	0	0	0	0	0	0	0	0	0	0	0	0	0	0	0	0	0	0	0	0	0	0	0	0	0	0	0	0	0	0	0	0	0	0	0	0
432	155976	140.62	111.51	169.72	14.85	0	0	0	0	0	0	0	0	0	0	0	0	0	0	0	0	0	0	0	0	0	0	0	0	0	0	0	0	0	0	0	0	0	0	0	0	0	0	0
433	156337	140.64	111.49	169.8	14.87	0	0	0	0	0	0	0	0	0	0	0	0	0	0	0	0	0	0	0	0	0	0	0	0	0	0	0	0	0	0	0	0	0	0	0	0	0	0	0
434	156698	140.67	111.48	169.87	14.9	0	0	0	0	0	0	0	0	0	0	0	0	0	0	0	0	0	0	0	0	0	0	0	0	0	0	0	0	0	0	0	0	0	0	0	0	0	0	0
435	157059	140.7	111.46	169.94	14.92	0	0	0	0	0	0	0	0	0	0	0	0	0	0	0	0	0	0	0	0	0	0	0	0	0	0	0	0	0	0	0	0	0	0	0	0	0	0	0
436	157420	140.73	111.45	170.01	14.94	0	0	0	0	0	0	0	0	0	0	0	0	0	0	0	0	0	0	0	0	0	0	0	0	0	0	0	0	0	0	0	0	0	0	0	0	0	0	0
437	157781	140.76	111.43	170.08	14.96	0	0	0	0	0	0	0	0	0	0	0	0	0	0	0	0	0	0	0	0	0	0	0	0	0	0	0	0	0	0	0	0	0	0	0	0	0	0	0
438	158142	140.78	111.42	170.15	14.98	0	0	0	0	0	0	0	0	0	0	0	0	0	0	0	0	0	0	0	0	0	0	0	0	0	0	0	0	0	0	0	0	0	0	0	0	0	0	0
439	158503	140.81	111.4	170.22	15.01	0	0	0	0	0	0	0	0	0	0	0	0	0	0	0	0	0	0	0	0	0	0	0	0	0	0	0	0	0	0	0	0	0	0	0	0	0	0	0
440	158864	140.84	111.39	170.29	15.03	0	0	0	0	0	0	0	0	0	0	0	0	0	0	0	0	0	0	0	0	0	0	0	0	0	0	0	0	0	0	0	0	0	0	0	0	0	0	0
441	159225	140.87	111.37	170.36	15.05	0	0	0	0	0	0	0	0	0	0	0	0	0	0	0	0	0	0	0	0	0	0	0	0	0	0	0	0	0	0	0	0	0	0	0	0	0	0	0
442	159586	140.89	111.36	170.43	15.07	0	0	0	0	0	0	0	0	0	0	0	0	0	0	0	0	0	0	0	0	0	0	0	0	0	0	0	0	0	0	0	0	0	0	0	0	0	0	0
443	159947	140.92	111.34	170.5	15.09	0	0	0	0	0	0	0	0	0	0	0	0	0	0	0	0	0	0	0	0	0	0	0	0	0	0	0	0	0	0	0	0	0	0	0	0	0	0	0
444	160308	140.95	111.33	170.57	15.11	0	0	0	0	0	0	0	0	0	0	0	0	0	0	0	0	0	0	0	0	0	0	0	0	0	0	0	0	0	0	0	0	0	0	0	0	0	0	0
445	160669	140.97	111.31	170.63	15.13	0	0	0	0	0	0	0	0	0	0	0	0	0	0	0	0	0	0	0	0	0	0	0	0	0	0	0	0	0	0	0	0	0	0	0	0	0	0	0
446	161030	141	111.3	170.7	15.15	0	0	0	0	0	0	0	0	0	0	0	0	0	0	0	0	0	0	0	0	0	0	0	0	0	0	0	0	0	0	0	0	0	0	0	0	0	0	0
447	161391	141.02	111.28	170.77	15.18	0	0	0	0	0	0	0	0	0	0	0	0	0	0	0	0	0	0	0	0	0	0	0	0	0	0	0	0	0	0	0	0	0	0	0	0	0	0	0
448	161752	141.05	111.27	170.83	15.2	0	0	0	0	0	0	0	0	0	0	0	0	0	0	0	0	0	0	0	0	0	0	0	0	0	0	0	0	0	0	0	0	0	0	0	0	0	0	0
449	162113	141.08	111.25	170.9	15.22	0	0	0	0	0	0	0	0	0	0	0	0	0	0	0	0	0	0	0	0	0	0	0	0	0	0	0	0	0	0	0	0	0	0	0	0	0	0	0
450	162475	141.1	111.24	170.97	15.24	0	0	0	0	0	0	0	0	0	0	0	0	0	0	0	0	0	0	0	0	0	0	0	0	0	0	0	0	0	0	0	0	0	0	0	0	0	0	0
451	162836	141.13	111.22	171.03	15.26	0	0	0	0	0	0	0	0	0	0	0	0	0	0	0	0	0	0	0	0	0	0	0	0	0	0	0	0	0	0	0	0	0	0	0	0	0	0	0
452	163197	141.15	111.21	171.1	15.28	0	0	0	0	0	0	0	0	0	0	0	0	0	0	0	0	0	0	0	0	0	0	0	0	0	0	0	0	0	0	0	0	0	0	0	0	0	0	0
453	163558	141.18	111.19	171.16	15.3	0	0	0	0	0	0	0	0	0	0	0	0	0	0	0	0	0	0	0	0	0	0	0	0	0	0	0	0	0	0	0	0	0	0	0	0	0	0	0
454	163919	141.2	111.18	171.23	15.32	0	0	0	0	0	0	0	0	0	0	0	0	0	0	0	0	0	0	0	0	0	0	0	0	0	0	0	0	0	0	0	0	0	0	0	0	0	0	0
455	164280	141.23	111.16	171.29	15.34	0	0	0	0	0	0	0	0	0	0	0	0	0	0	0	0	0	0	0	0	0	0	0	0	0	0	0	0	0	0	0	0	0	0	0	0	0	0	0
456	164641	141.25	111.14	171.35	15.36	0	0	0	0	0	0	0	0	0	0	0	0	0	0	0	0	0	0	0	0	0	0	0	0	0	0	0	0	0	0	0	0	0	0	0	0	0	0	0
457	165002	141.27	111.13	171.42	15.38	0	0	0	0	0	0	0	0	0	0	0	0	0	0	0	0	0	0	0	0	0	0	0	0	0	0	0	0	0	0	0	0	0	0	0	0	0	0	0
458	165363	141.3	111.11	171.48	15.4	0	0	0	0	0	0	0	0	0	0	0	0	0	0	0	0	0	0	0	0	0	0	0	0	0	0	0	0	0	0	0	0	0	0	0	0	0	0	0
459	165724	141.32	111.1	171.54	15.42	0	0	0	0	0	0	0	0	0	0	0	0	0	0	0	0	0	0	0	0	0	0	0	0	0	0	0	0	0	0	0	0	0	0	0	0	0	0	0
460	166085	141.35	111.08	171.61	15.44	0	0	0	0	0	0	0	0	0	0	0	0	0	0	0	0	0	0	0	0	0	0	0	0	0	0	0	0	0	0	0	0	0	0	0	0	0	0	0
461	166446	141.37	111.07	171.67	15.46	0	0	0	0	0	0	0	0	0	0	0	0	0	0	0	0	0	0	0	0	0	0	0	0	0	0	0	0	0	0	0	0	0	0	0	0	0	0	0
462	166807	141.39	111.05	171.73	15.48	0	0	0	0	0	0	0	0	0	0	0	0	0	0	0	0	0	0	0	0	0	0	0	0	0	0	0	0	0	0	0	0	0	0	0	0	0	0	0
463	167168	141.42	111.04	171.79	15.5	0	0	0	0	0	0	0	0	0	0	0	0	0	0	0	0	0	0	0	0	0	0	0	0	0	0	0	0	0	0	0	0	0	0	0	0	0	0	0
464	167529	141.44	111.02	171.85	15.52	0	0	0	0	0	0	0	0	0	0	0	0	0	0	0	0	0	0	0	0	0	0	0	0	0	0	0	0	0	0	0	0	0	0	0	0	0	0	0
465	167890	141.46	111.01	171.91	15.54	0	0	0	0	0	0	0	0	0	0	0	0	0	0	0	0	0	0	0	0	0	0	0	0	0	0	0	0	0	0	0	0	0	0	0	0	0	0	0
466	168251	141.48	110.99	171.97	15.56	0	0	0	0	0	0	0	0	0	0	0	0	0	0	0	0	0	0	0	0	0	0	0	0	0	0	0	0	0	0	0	0	0	0	0	0	0	0	0
467	168612	141.51	110.98	172.03	15.58	0	0	0	0	0	0	0	0	0	0	0	0	0	0	0	0	0	0	0	0	0	0	0	0	0	0	0	0	0	0	0	0	0	0	0	0	0	0	0
468	168974	141.53	110.96	172.09	15.59	0	0	0	0	0	0	0	0	0	0	0	0	0	0	0	0	0	0	0	0	0	0	0	0	0	0	0	0	0	0	0	0	0	0	0	0	0	0	0
469	169335	141.55	110.95	172.15	15.61	0	0	0	0	0	0	0	0	0	0	0	0	0	0	0	0	0	0	0	0	0	0	0	0	0	0	0	0	0	0	0	0	0	0	0	0	0	0	0
470	169696	141.57	110.93	172.21	15.63	0	0	0	0	0	0	0	0	0	0	0	0	0	0	0	0	0	0	0	0	0	0	0	0	0	0	0	0	0	0	0	0	0	0	0	0	0	0	0
471	170057	141.6	110.92	172.27	15.65	0	0	0	0	0	0	0	0	0	0	0	0	0	0	0	0	0	0	0	0	0	0	0	0	0	0	0	0	0	0	0	0	0	0	0	0	0	0	0
472	170418	141.62	110.9	172.33	15.67	0	0	0	0	0	0	0	0	0	0	0	0	0	0	0	0	0	0	0	0	0	0	0	0	0	0	0	0	0	0	0	0	0	0	0	0	0	0	0
473	170779	141.64	110.89	172.39	15.69	0	0	0	0	0	0	0	0	0	0	0	0	0	0	0	0	0	0	0	0	0	0	0	0	0	0	0	0	0	0	0	0	0	0	0	0	0	0	0
474	171140	141.66	110.87	172.45	15.71	0	0	0	0	0	0	0	0	0	0	0	0	0	0	0	0	0	0	0	0	0	0	0	0	0	0	0	0	0	0	0	0	0	0	0	0	0	0	0
475	171501	141.68	110.86	172.5	15.73	0	0	0	0	0	0	0	0	0	0	0	0	0	0	0	0	0	0	0	0	0	0	0	0	0	0	0	0	0	0	0	0	0	0	0	0	0	0	0
476	171862	141.7	110.84	172.56	15.74	0	0	0	0	0	0	0	0	0	0	0	0	0	0	0	0	0	0	0	0	0	0	0	0	0	0	0	0	0	0	0	0	0	0	0	0	0	0	0
477	172223	141.72	110.83	172.62	15.76	0	0	0	0	0	0	0	0	0	0	0	0	0	0	0	0	0	0	0	0	0	0	0	0	0	0	0	0	0	0	0	0	0	0	0	0	0	0	0
478	172584	141.74	110.81	172.68	15.78	0	0	0	0	0	0	0	0	0	0	0	0	0	0	0	0	0	0	0	0	0	0	0	0	0	0	0	0	0	0	0	0	0	0	0	0	0	0	0
479	172945	141.76	110.8	172.73	15.8	0	0	0	0	0	0	0	0	0	0	0	0	0	0	0	0	0	0	0	0	0	0	0	0	0	0	0	0	0	0	0	0	0	0	0	0	0	0	0
480	173306	141.79	110.78	172.79	15.82	0	0	0	0	0	0	0	0	0	0	0	0	0	0	0	0	0	0	0	0	0	0	0	0	0	0	0	0	0	0	0	0	0	0	0	0	0	0	0
481	173667	141.81	110.77	172.84	15.84	0	0	0	0	0	0	0	0	0	0	0	0	0	0	0	0	0	0	0	0	0	0	0	0	0	0	0	0	0	0	0	0	0	0	0	0	0	0	0
482	174028	141.83	110.75	172.9	15.85	0	0	0	0	0	0	0	0	0	0	0	0	0	0	0	0	0	0	0	0	0	0	0	0	0	0	0	0	0	0	0	0	0	0	0	0	0	0	0
483	174389	141.85	110.74	172.95	15.87	0	0	0	0	0	0	0	0	0	0	0	0	0	0	0	0	0	0	0	0	0	0	0	0	0	0	0	0	0	0	0	0	0	0	0	0	0	0	0
484	174750	141.87	110.72	173.01	15.89	0	0	0	0	0	0	0	0	0	0	0	0	0	0	0	0	0	0	0	0	0	0	0	0	0	0	0	0	0	0	0	0	0	0	0	0	0	0	0
485	175111	141.89	110.71	173.06	15.91	0	0	0	0	0	0	0	0	0	0	0	0	0	0	0	0	0	0	0	0	0	0	0	0	0	0	0	0	0	0	0	0	0	0	0	0	0	0	0
486	175473	141.91	110.69	173.12	15.92	0	0	0	0	0	0	0	0	0	0	0	0	0	0	0	0	0	0	0	0	0	0	0	0	0	0	0	0	0	0	0	0	0	0	0	0	0	0	0
487	175834	141.93	110.68	173.17	15.94	0	0	0	0	0	0	0	0	0	0	0	0	0	0	0	0	0	0	0	0	0	0	0	0	0	0	0	0	0	0	0	0	0	0	0	0	0	0	0
488	176195	141.94	110.66	173.22	15.96	0	0	0	0	0	0	0	0	0	0	0	0	0	0	0	0	0	0	0	0	0	0	0	0	0	0	0	0	0	0	0	0	0	0	0	0	0	0	0
489	176556	141.96	110.65	173.28	15.98	0	0	0	0	0	0	0	0	0	0	0	0	0	0	0	0	0	0	0	0	0	0	0	0	0	0	0	0	0	0	0	0	0	0	0	0	0	0	0
490	176917	141.98	110.63	173.33	15.99	0	0	0	0	0	0	0	0	0	0	0	0	0	0	0	0	0	0	0	0	0	0	0	0	0	0	0	0	0	0	0	0	0	0	0	0	0	0	0
491	177278	142	110.62	173.38	16.01	0	0	0	0	0	0	0	0	0	0	0	0	0	0	0	0	0	0	0	0	0	0	0	0	0	0	0	0	0	0	0	0	0	0	0	0	0	0	0
492	177639	142.02	110.6	173.44	16.03	0	0	0	0	0	0	0	0	0	0	0	0	0	0	0	0	0	0	0	0	0	0	0	0	0	0	0	0	0	0	0	0	0	0	0	0	0	0	0
493	178000	142.04	110.59	173.49	16.05	0	0	0	0	0	0	0	0	0	0	0	0	0	0	0	0	0	0	0	0	0	0	0	0	0	0	0	0	0	0	0	0	0	0	0	0	0	0	0
494	178361	142.06	110.58	173.54	16.06	0	0	0	0	0	0	0	0	0	0	0	0	0	0	0	0	0	0	0	0	0	0	0	0	0	0	0	0	0	0	0	0	0	0	0	0	0	0	0
495	178722	142.08	110.56	173.59	16.08	0	0	0	0	0	0	0	0	0	0	0	0	0	0	0	0	0	0	0	0	0	0	0	0	0	0	0	0	0	0	0	0	0	0	0	0	0	0	0
496	179083	142.09	110.55	173.64	16.1	0	0	0	0	0	0	0	0	0	0	0	0	0	0	0	0	0	0	0	0	0	0	0	0	0	0	0	0	0	0	0	0	0	0	0	0	0	0	0
497	179444	142.11	110.53	173.69	16.11	0	0	0	0	0	0	0	0	0	0	0	0	0	0	0	0	0	0	0	0	0	0	0	0	0	0	0	0	0	0	0	0	0	0	0	0	0	0	0
498	179805	142.13	110.52	173.75	16.13	0	0	0	0	0	0	0	0	0	0	0	0	0	0	0	0	0	0	0	0	0	0	0	0	0	0	0	0	0	0	0	0	0	0	0	0	0	0	0
499	180166	142.15	110.5	173.8	16.15	0	0	0	0	0	0	0	0	0	0	0	0	0	0	0	0	0	0	0	0	0	0	0	0	0	0	0	0	0	0	0	0	0	0	0	0	0	0	0
500	180527	142.17	110.49	173.85	16.16	0	0	0	0	0	0	0	0	0	0	0	0	0	0	0	0	0	0	0	0	0	0	0	0	0	0	0	0	0	0	0	0	0	0	0	0	0	0	0

## Sheet: Zooplankton mezotrophy
EstimateS (Version 9.1.0), Copyright R. K. Colwell: http://purl.oclc.org/estimates
Diversity Output from Input File: DIMI (11, sierpieÄ 2017, )
Reference Sample = 57
Samples	Individuals (computed)	S(est)	S(est) 95% CI Lower Bound	S(est) 95% CI Upper Bound	S(est) SD	S Mean (runs)	Singletons Mean	Singletons SD (runs)	Doubletons Mean	Doubletons SD (runs)	Uniques Mean	Uniques SD (runs)	Duplicates Mean	Duplicates SD (runs)	ACE Mean	ACE SD (runs)	ICE Mean	ICE SD (runs)	Chao 1 Mean	Chao 1 95% CI Lower Bound	Chao 1 95% CI Upper Bound	Chao 1 SD (analytical)	Chao 2 Mean	Chao 2 95% CI Lower Bound	Chao 2 95% CI Upper Bound	Chao 2 SD (analytical)	Jack 1 Mean	Jack 1 SD (analytical)	Jack 2 Mean	Jack 2 SD (runs)	Bootstrap Mean	Bootstrap SD (runs)	MMRuns Mean	MMMeans (1 run)	Cole Rarefaction	Cole SD (analytical)	Alpha Mean	Alpha SD (analytical)	Shannon Mean	Shannon SD (runs)	Shannon Exponential Mean	Shannon Exponential SD (runs)	Simpson Inv Mean	Simpson Inv SD (runs)
1	260.21	18.4	13.17	23.63	2.67	19.2	8.69	4.29	2.05	1.59	19.2	4.91	0	0	42.35	30.95	19.2	4.91	42.68	26.85	98.08	15.61	19.2	30.37	30.37	0	19.2	0	0	0	19.2	4.91	0	0	31.85	2.59	7.95	1.8	1.98	0.56	8.2	3.55	5.18	2.69
2	520.42	27.1	20.33	33.88	3.46	28.04	9.53	3.94	3.63	1.95	18.04	4.51	10	3.01	41.27	13.33	77.1	32.6	40.74	31.34	78.65	10.11	36.4	30.66	55.17	5.48	37.06	2.61	37.06	6.83	32.55	5.83	73.9	51.39	38.62	2.58	7.61	0.88	2.15	0.44	9.37	3.45	5.45	2.35
3	780.63	32.6	25.11	40.09	3.82	33.28	10.25	4.09	3.48	2.05	17.29	4.16	9.01	2.61	45.81	11.58	59.24	14.74	49.41	37.62	95.29	12.43	44.07	36.68	67.94	7.01	44.81	3.46	49.07	8.12	38.74	5.66	61.19	52.78	42.53	2.67	7.91	0.73	2.21	0.41	9.82	3.48	5.5	2.25
4	1040.84	36.6	28.72	44.47	4.02	37.15	10.5	4.21	3.81	1.97	16.63	4.68	8.98	2.75	49.53	12.91	57.02	14.36	51.52	41	92.34	11.08	48.96	40.9	74.92	7.63	49.62	3.89	54.94	10.12	43	6.05	62.03	54.03	45.46	2.78	8.23	0.68	2.25	0.4	10.22	3.57	5.62	2.25
5	1301.05	39.76	31.67	47.86	4.13	40.34	10.76	3.9	3.96	1.85	16.6	4.61	8.19	2.35	52.59	11.54	58.09	12.65	54.02	43.98	93.06	10.58	53.29	44.47	81.66	8.35	53.62	4.19	59.89	10.86	46.49	6.15	81.85	55.18	47.88	2.88	8.59	0.66	2.32	0.32	10.67	3.18	5.78	2.02
6	1561.26	42.42	34.19	50.64	4.2	42.59	10.9	3.55	3.76	1.68	16.03	4.35	7.62	2.68	54.93	10.65	58.32	11.28	57.09	46.42	98.59	11.26	56.26	46.85	87.11	9	55.95	4.33	62.57	10.79	48.74	6.26	63.22	56.28	50.01	2.96	8.63	0.62	2.35	0.3	10.93	3.2	5.93	2.1
7	1821.47	44.73	36.42	53.03	4.24	45.06	11.61	3.7	3.48	1.65	16.53	4.36	7.04	2.46	59.17	12.06	61.19	11.44	62.27	49.69	110.19	13.11	61.39	50.19	97.72	10.65	59.23	4.69	66.85	11.3	51.48	6.4	61.18	57.33	51.91	3.03	8.79	0.6	2.38	0.27	11.16	2.98	5.99	1.93
8	2081.68	46.8	38.45	55.15	4.26	47.07	12.05	3.86	3.73	1.75	16.79	4.51	6.71	2.45	62.73	12.93	63.39	11.77	64.82	51.95	112.81	13.25	65.83	53	107.08	12.15	61.76	4.76	70.04	12.05	53.66	6.54	61.35	58.34	53.66	3.08	8.88	0.58	2.38	0.26	11.14	2.82	5.94	1.82
9	2341.89	48.7	40.32	57.08	4.28	49.09	12.62	3.91	3.83	1.71	17.25	4.59	6.62	2.38	66.41	13.41	66.09	11.9	68.92	54.78	119.71	14.25	68.98	55.45	111.99	12.73	64.42	4.95	73.33	12.26	55.92	6.52	61.72	59.32	55.29	3.13	9.08	0.57	2.41	0.22	11.46	2.61	6.14	1.74
10	2602.11	50.45	42.06	58.85	4.28	51.03	13.3	4.04	3.86	1.71	18.02	4.88	6.33	2.17	70.03	14.42	69.3	12.72	73.94	57.86	129.89	15.9	73.68	58.4	121.36	14.22	67.25	5.19	77.16	13.33	58.16	6.79	62.22	60.28	56.81	3.17	9.26	0.56	2.44	0.21	11.76	2.55	6.26	1.64
11	2862.32	52.1	43.69	60.5	4.29	52.38	13.72	3.99	3.78	1.83	18.35	4.8	6.15	2.29	72.76	14.65	71.1	12.58	75.81	59.16	134.54	16.61	78.04	60.95	130.31	15.72	69.06	5.45	79.55	13.16	59.66	6.77	62.73	61.2	58.24	3.2	9.31	0.55	2.45	0.21	11.85	2.53	6.33	1.57
12	3122.53	53.65	45.24	62.06	4.29	53.88	14.28	3.84	3.76	1.88	18.95	4.68	5.77	2.17	75.09	13.78	73.58	12.73	79.02	61.21	141.29	17.68	81.62	62.93	139.67	17.36	71.25	5.57	82.67	13.25	61.38	6.95	63.34	62.11	59.6	3.22	9.47	0.54	2.47	0.2	12.01	2.4	6.41	1.51
13	3382.74	55.13	46.72	63.55	4.29	55.16	14.75	3.89	3.85	1.8	19.4	4.71	5.58	1.97	77.81	14.35	75.72	12.92	81.34	62.85	145.38	18.26	85	64.98	146.49	18.47	73.07	5.63	85.16	13.49	62.84	6.91	63.94	62.99	60.89	3.24	9.54	0.54	2.48	0.19	12.1	2.32	6.46	1.45
14	3642.95	56.55	48.13	64.96	4.29	56.41	15.25	4.01	3.92	1.95	19.82	4.73	5.66	2.17	80.52	14.89	77.97	13.42	85.73	65.22	155.26	20.01	87.88	66.81	152.42	19.42	74.81	5.62	87.32	13.61	64.27	7	64.55	63.86	62.13	3.25	9.66	0.53	2.49	0.18	12.26	2.32	6.58	1.49
15	3903.16	57.9	49.49	66.32	4.29	57.98	15.8	3.95	3.95	1.9	20.54	4.87	5.74	2.24	83.17	15.16	81.19	14.35	87.54	66.92	156.85	20.02	90.98	69.03	157.35	20.08	77.15	5.88	90.33	13.94	66.13	7.23	65.25	64.7	63.31	3.26	9.79	0.53	2.49	0.17	12.28	2.15	6.58	1.4
16	4163.37	59.21	50.79	67.62	4.29	59.11	16.21	4.09	4.12	1.84	20.85	4.92	5.97	2.38	85.63	16.05	83.37	14.8	89.27	68.28	159.27	20.29	92.74	70.43	159.78	20.33	78.66	5.83	92.03	14.14	67.41	7.3	65.92	65.53	64.44	3.26	9.89	0.52	2.51	0.17	12.49	2.13	6.68	1.36
17	4423.58	60.47	52.05	68.89	4.3	60.39	16.62	3.94	4.26	1.77	21.24	4.84	6.5	2.35	87.08	14.96	85.79	14.93	90.91	69.67	161.47	20.49	92.22	71.25	154.48	18.99	80.38	5.93	93.74	13.91	68.91	7.27	66.61	66.34	65.54	3.26	10.01	0.52	2.51	0.17	12.5	2.11	6.67	1.34
18	4683.79	61.68	53.26	70.11	4.3	61.48	17.06	4.04	4.33	1.69	21.64	4.71	6.59	2.3	89.58	15.56	88.06	14.83	91.74	70.83	160.23	20.01	93.54	72.53	155.15	18.89	81.92	6	95.64	13.51	70.17	7.06	67.27	67.13	66.59	3.25	10.11	0.52	2.52	0.16	12.53	1.94	6.63	1.26
19	4944	62.86	54.43	71.29	4.3	62.71	17.46	4.09	4.45	1.74	22.18	4.71	6.66	2.38	91.05	15.98	90.73	15.09	94.88	72.83	165.99	20.92	97.12	74.62	162.81	20.18	83.72	6.15	97.94	13.61	71.62	7.05	67.95	67.91	67.6	3.24	10.25	0.52	2.53	0.15	12.65	1.92	6.73	1.3
20	5204.21	64	55.57	72.44	4.3	63.81	17.83	3.8	4.62	1.66	22.72	4.25	6.8	2.24	92.94	14.94	93.43	14.34	94.59	73.47	162.6	20.02	98.6	75.95	164.13	20.22	85.39	6.27	100.04	12.37	72.94	6.62	68.63	68.67	68.59	3.23	10.36	0.52	2.53	0.15	12.75	1.92	6.79	1.29
21	5464.42	65.11	56.67	73.55	4.31	64.6	17.97	3.69	4.82	1.8	22.82	4.23	7.09	2.08	93.56	14.3	94.97	14.15	95.02	74.17	161.95	19.73	97.28	76.14	157.6	18.73	86.33	6.26	100.89	12.41	73.82	6.58	69.27	69.42	69.54	3.22	10.4	0.51	2.54	0.14	12.78	1.83	6.82	1.23
22	5724.63	66.19	57.74	74.64	4.31	65.33	18.17	3.86	4.92	1.79	22.96	4.42	7.18	2.15	95.07	15.42	96.71	15.02	96.34	75.15	163.9	19.97	98.28	77.01	158.83	18.82	87.25	6.25	101.9	12.92	74.63	6.82	69.87	70.15	70.46	3.2	10.42	0.51	2.54	0.13	12.82	1.73	6.85	1.14
23	5984.84	67.24	58.78	75.69	4.31	66.17	18.47	4.03	5.12	1.77	23.25	4.45	7.39	2.22	97.12	16.45	98.79	15.05	96.94	76.03	162.92	19.59	99.53	78.06	160.23	18.92	88.41	6.29	103.2	13.11	75.61	6.82	70.43	70.86	71.35	3.18	10.48	0.51	2.54	0.13	12.83	1.6	6.82	0.99
24	6245.05	68.26	59.79	76.72	4.32	66.98	18.73	4.04	5.23	1.83	23.46	4.45	7.64	2.31	98.59	16.79	100.51	15.19	98.02	76.99	163.96	19.64	99.75	78.74	158.79	18.45	89.46	6.3	104.27	13.11	76.54	6.88	70.98	71.57	72.21	3.16	10.54	0.5	2.55	0.13	12.85	1.6	6.82	0.94
25	6505.26	69.25	60.77	77.73	4.33	67.91	19	4.01	5.44	1.86	23.68	4.42	7.82	2.32	100.01	16.45	102.27	15.12	98.87	77.97	163.84	19.42	101.09	79.85	160.66	18.64	90.64	6.29	105.53	13.14	77.59	6.82	71.53	72.26	73.05	3.13	10.63	0.5	2.55	0.12	12.87	1.56	6.82	0.87
26	6765.47	70.22	61.73	78.71	4.33	68.82	19.36	4.11	5.53	1.9	24.1	4.29	7.95	2.32	102.25	17.5	104.81	15.11	100.51	79.21	166.13	19.69	102.2	80.93	161.26	18.56	91.99	6.36	107.19	12.66	78.68	6.63	72.08	72.93	73.87	3.11	10.71	0.5	2.55	0.12	12.89	1.5	6.83	0.84
27	7025.68	71.16	62.66	79.67	4.34	69.95	19.71	4.15	5.71	1.94	24.58	4.21	8.28	2.28	103.55	17.58	107.77	15.45	101.9	80.51	167.21	19.67	103.24	82.15	161.2	18.29	93.62	6.57	109.01	12.42	80.03	6.45	72.65	73.6	74.67	3.08	10.82	0.5	2.56	0.11	12.96	1.43	6.9	0.83
28	7285.89	72.09	63.56	80.61	4.35	70.85	19.95	4.15	5.85	1.98	24.81	4.19	8.64	2.32	104.74	17.68	109.45	15.43	103.25	81.62	168.85	19.82	103.44	82.9	159.3	17.72	94.77	6.6	110.09	12.54	81.07	6.42	73.22	74.25	75.44	3.05	10.89	0.5	2.55	0.1	12.93	1.32	6.89	0.78
29	7546.11	72.99	64.45	81.53	4.36	72.06	20.45	4.06	5.89	2.09	25.38	4.16	8.8	2.33	106.75	17.46	112.43	15.89	106.55	83.58	175.85	20.99	105.58	84.57	162.17	18.03	96.56	6.72	112.29	12.51	82.53	6.37	73.82	74.89	76.2	3.01	11.04	0.5	2.56	0.1	12.97	1.28	6.89	0.75
30	7806.32	73.87	65.31	82.42	4.37	72.72	20.59	3.95	5.97	2.19	25.45	4.19	9.01	2.45	107.53	16.8	113.44	15.93	107.42	84.32	177.1	21.11	105.76	85.07	161.42	17.74	97.32	6.71	112.96	12.66	83.26	6.61	74.39	75.52	76.94	2.98	11.09	0.5	2.56	0.1	12.96	1.29	6.88	0.74
31	8066.53	74.73	66.15	83.3	4.38	73.64	20.93	3.86	6	2.19	25.83	4.09	9.18	2.46	109.11	16.78	115.63	15.87	108.4	85.35	177.41	20.98	106.79	86.1	162.15	17.68	98.64	6.73	114.5	12.4	84.35	6.68	74.96	76.13	77.65	2.94	11.19	0.5	2.56	0.1	12.95	1.22	6.85	0.7
32	8326.74	75.57	66.97	84.16	4.39	74.48	21.27	3.83	6.12	2.11	26.13	4.07	9.34	2.46	110.67	16.52	117.61	15.96	109.69	86.42	178.87	21.09	108.08	87.18	163.63	17.8	99.79	6.75	115.82	12.44	85.33	6.51	75.52	76.74	78.36	2.9	11.28	0.5	2.56	0.1	13.02	1.25	6.9	0.68
33	8586.95	76.39	67.77	85.01	4.4	75.14	21.4	3.8	6.34	2.04	26.22	4.05	9.61	2.52	111.36	16.61	118.95	15.81	109.37	86.81	176.01	20.37	108.24	87.69	162.78	17.49	100.57	6.75	116.45	12.3	86.07	6.39	76.06	77.33	79.04	2.86	11.33	0.5	2.57	0.09	13.07	1.18	6.93	0.68
34	8847.16	77.19	68.55	85.83	4.41	75.95	21.37	3.76	6.49	2.16	26.31	3.93	9.88	2.52	110.77	15.28	119.92	15.44	109.55	87.41	174.89	19.98	108.28	88.25	161.2	17.01	101.49	6.81	117.23	12.02	86.96	6.33	76.6	77.92	79.71	2.81	11.41	0.5	2.57	0.09	13.11	1.14	6.96	0.66
35	9107.37	77.98	69.32	86.65	4.42	76.62	21.5	3.8	6.59	2.01	26.38	3.95	10.01	2.48	111.38	15.33	120.59	15.33	109.65	87.96	173.3	19.52	108.49	88.78	160.4	16.7	102.25	6.81	117.96	12.1	87.69	6.46	77.13	78.49	80.37	2.77	11.47	0.5	2.57	0.09	13.15	1.12	6.97	0.64
36	9367.58	78.75	70.07	87.44	4.43	77.39	21.96	3.74	6.63	2.06	26.71	3.94	10.06	2.48	113.31	15.27	122.35	15.33	111.85	89.29	177.6	20.22	109.94	89.86	162.56	16.97	103.36	6.83	119.35	12	88.6	6.38	77.65	79.06	81.01	2.72	11.56	0.5	2.57	0.08	13.17	1.09	6.98	0.61
37	9627.79	79.51	70.8	88.22	4.45	78.2	22.16	3.71	6.77	2.1	26.92	3.92	10.3	2.46	113.95	14.71	123.79	15.13	112.38	90.07	176.94	19.92	110.57	90.66	162.47	16.77	104.39	6.84	120.38	11.95	89.53	6.18	78.17	79.61	81.63	2.67	11.65	0.5	2.58	0.08	13.2	1.06	6.98	0.58
38	9888	80.25	71.51	88.99	4.46	79.45	22.49	3.69	6.9	2.05	27.31	3.57	10.74	2.6	115.1	15.11	125.81	14.03	114.13	91.58	179	20.07	111.54	91.87	162.57	16.53	106.04	6.93	122.01	10.94	90.99	5.82	78.71	80.16	82.25	2.62	11.82	0.5	2.58	0.08	13.25	1.03	6.98	0.55
39	10148.2	80.98	72.21	89.75	4.47	80.36	22.68	3.56	6.95	1.97	27.63	3.4	10.84	2.62	115.52	14.61	127.24	13.3	115.07	92.55	179.54	19.99	112.87	93	164.2	16.66	107.28	7.03	123.48	10.36	92.05	5.42	79.26	80.7	82.85	2.56	11.92	0.5	2.58	0.08	13.27	1	6.99	0.54
40	10408.4	81.69	72.89	90.49	4.49	81.17	23.16	3.55	6.96	1.95	28.04	3.34	10.86	2.67	117.2	15.58	129.11	13.05	116.94	93.83	182.56	20.42	114.6	94.23	166.93	17.03	108.51	7.08	125.09	10.14	93.02	5.34	79.8	81.23	83.44	2.5	12.03	0.5	2.59	0.07	13.32	0.97	7.02	0.53
41	10668.6	82.39	73.56	91.22	4.51	81.97	23.53	3.4	7.11	2	28.39	3.18	10.87	2.74	118.44	15.25	130.51	12.41	118.42	94.92	184.93	20.73	116.29	95.41	169.8	17.43	109.67	7.12	126.59	9.64	93.97	5.15	80.34	81.75	84.02	2.44	12.11	0.5	2.59	0.07	13.35	0.98	7.02	0.53
42	10928.8	83.07	74.21	91.93	4.52	82.93	23.71	3.39	7.29	1.94	28.63	3.12	11.23	2.61	118.94	14.82	131.22	12.16	118.35	95.62	182.1	19.95	116.48	96.15	168.26	16.92	110.88	7.17	127.71	9.41	95.07	5.02	80.89	82.26	84.58	2.37	12.21	0.5	2.59	0.07	13.36	0.96	7.03	0.5
43	11189	83.75	74.85	92.64	4.54	83.59	23.9	3.22	7.52	1.91	28.75	2.92	11.53	2.55	119.56	14.28	131.47	11.39	118.3	96.09	180.18	19.42	116.53	96.61	167.1	16.55	111.67	7.19	128.35	8.86	95.82	4.71	81.42	82.76	85.14	2.31	12.28	0.5	2.59	0.07	13.35	0.92	7.01	0.47
44	11449.3	84.46	75.52	93.39	4.56	84.31	24.24	3.16	7.63	1.98	29.07	2.85	11.61	2.65	120.55	13.67	132.55	11.09	119.69	97.11	182.29	19.68	118.05	97.68	169.62	16.9	112.72	7.23	129.64	8.59	96.67	4.5	81.95	83.26	85.69	2.23	12.34	0.5	2.59	0.06	13.32	0.87	7.02	0.45
45	11709.5	85.05	76.09	94.02	4.57	85.2	24.29	2.82	7.9	1.91	29.26	2.52	11.86	2.52	120.43	11.74	132.5	9.71	119.44	97.63	179.64	18.97	118.75	98.53	169.75	16.74	113.81	7.29	130.69	7.71	97.68	3.87	82.49	83.75	86.22	2.16	12.45	0.5	2.59	0.06	13.39	0.84	7.05	0.44
46	11969.7	85.69	76.69	94.69	4.59	85.98	24.46	2.72	8.03	1.83	29.46	2.46	12.05	2.38	120.77	11.13	132.78	10.11	120	98.38	179.48	18.77	119.16	99.22	169.25	16.47	114.8	7.3	131.71	7.4	98.56	3.83	83.02	84.23	86.75	2.08	12.53	0.5	2.59	0.06	13.38	0.79	7.04	0.42
47	12229.9	86.32	77.27	95.36	4.61	86.4	24.47	2.8	8.14	1.89	29.37	2.51	12.2	2.31	120.8	11.41	131.34	9.68	120.34	98.78	179.56	18.7	118.78	99.34	167.5	16.03	115.15	7.27	131.84	7.55	98.98	3.85	83.53	84.7	87.27	1.99	12.55	0.5	2.59	0.05	13.39	0.73	7.03	0.38
48	12490.1	86.93	77.85	96.01	4.63	86.98	24.46	2.64	8.41	1.79	29.4	2.44	12.47	2.29	120.36	10.41	130.84	9.14	119.36	98.85	175.46	17.75	118.66	99.67	166.17	15.65	115.77	7.26	132.25	7.35	99.62	3.74	84.03	85.17	87.77	1.9	12.61	0.5	2.59	0.05	13.39	0.66	7.04	0.35
49	12750.3	87.53	78.41	96.65	4.65	87.66	24.37	2.58	8.65	1.66	29.36	2.4	12.81	2.18	119.67	9.69	130.31	8.57	118.62	99.04	172.01	16.92	118.41	99.99	164.38	15.15	116.42	7.27	132.55	7.26	100.34	3.34	84.52	85.63	88.27	1.8	12.67	0.5	2.6	0.05	13.42	0.63	7.05	0.32
50	13010.5	88.12	78.96	97.29	4.68	88.16	24.51	2.59	8.73	1.56	29.47	2.41	12.88	2.11	120.08	9.67	130.29	8.76	119.11	99.57	172.18	16.84	118.94	100.53	164.78	15.13	117.04	7.24	133.22	7.28	100.89	3.3	85	86.08	88.77	1.69	12.72	0.5	2.6	0.04	13.42	0.57	7.06	0.3
51	13270.7	88.71	79.5	97.91	4.7	88.82	24.67	2.4	8.94	1.49	29.65	2.2	13.01	1.93	120.47	8.66	130.95	8.21	119.35	100.12	171.4	16.55	119.53	101.2	165.06	15.04	117.89	7.22	134.13	6.64	101.64	3.03	85.48	86.53	89.25	1.57	12.78	0.5	2.59	0.04	13.4	0.48	7.05	0.25
52	13531	89.28	80.03	98.53	4.72	89.52	24.84	2.06	9.14	1.34	29.82	1.97	13.26	1.78	120.79	7.36	131.43	7.15	119.59	100.69	170.52	16.22	119.87	101.79	164.6	14.81	118.77	7.22	134.94	5.93	102.44	2.63	85.95	86.97	89.73	1.44	12.86	0.5	2.6	0.03	13.44	0.46	7.06	0.24
53	13791.2	89.84	80.54	99.14	4.75	89.98	24.79	1.98	9.39	1.18	29.74	1.86	13.49	1.56	120.59	6.99	131.14	6.57	119.1	100.81	168.34	15.69	119.52	101.93	163.06	14.41	119.16	7.18	135.05	5.59	102.92	2.5	86.41	87.4	90.19	1.3	12.9	0.5	2.6	0.03	13.45	0.43	7.07	0.24
54	14051.4	90.39	81.05	99.74	4.77	90.45	24.72	1.61	9.58	1.12	29.74	1.55	13.66	1.49	120.25	5.75	131.19	5.32	118.71	100.96	166.51	15.23	119.56	102.22	162.43	14.19	119.64	7.15	135.37	4.76	103.41	2.09	86.86	87.83	90.66	1.13	12.94	0.5	2.6	0.03	13.47	0.4	7.07	0.21
55	14311.6	90.94	81.54	100.34	4.8	91.02	24.82	1.33	9.73	0.99	29.81	1.31	13.8	1.16	120.52	4.73	131.73	4.53	118.97	101.43	166.06	15.02	119.82	102.68	162.12	14.02	120.29	7.16	135.96	3.94	104.04	1.68	87.31	88.25	91.11	0.93	13	0.5	2.6	0.02	13.49	0.33	7.08	0.18
56	14571.8	91.47	82.02	100.92	4.82	91.58	24.97	0.95	9.89	0.68	29.97	0.95	13.95	0.85	121.01	3.24	132.59	3.28	119.26	101.93	165.65	14.82	120.27	103.23	162.24	13.92	121.01	7.17	136.71	2.86	104.68	1.15	87.74	88.66	91.56	0.66	13.05	0.5	2.6	0.02	13.49	0.22	7.09	0.12
57	14832	92	82.5	101.5	4.85	92	25	0	10	0	30	0	14	0	121.04	0	132.98	0.03	119.27	102.2	164.89	14.59	120.49	103.57	162.15	13.82	121.47	7.16	137.15	0	105.12	0	88.17	89.07	0	0	13.08	0.5	2.6	0	13.5	0	7.09	0
58	15092.2	92.52	82.96	102.08	4.88	0	0	0	0	0	0	0	0	0	0	0	0	0	0	0	0	0	0	0	0	0	0	0	0	0	0	0	0	0	0	0	0	0	0	0	0	0	0	0
59	15352.4	93.03	83.41	102.64	4.91	0	0	0	0	0	0	0	0	0	0	0	0	0	0	0	0	0	0	0	0	0	0	0	0	0	0	0	0	0	0	0	0	0	0	0	0	0	0	0
60	15612.6	93.53	83.86	103.2	4.94	0	0	0	0	0	0	0	0	0	0	0	0	0	0	0	0	0	0	0	0	0	0	0	0	0	0	0	0	0	0	0	0	0	0	0	0	0	0	0
61	15872.8	94.02	84.29	103.75	4.97	0	0	0	0	0	0	0	0	0	0	0	0	0	0	0	0	0	0	0	0	0	0	0	0	0	0	0	0	0	0	0	0	0	0	0	0	0	0	0
62	16133	94.5	84.71	104.3	5	0	0	0	0	0	0	0	0	0	0	0	0	0	0	0	0	0	0	0	0	0	0	0	0	0	0	0	0	0	0	0	0	0	0	0	0	0	0	0
63	16393.3	94.98	85.12	104.84	5.03	0	0	0	0	0	0	0	0	0	0	0	0	0	0	0	0	0	0	0	0	0	0	0	0	0	0	0	0	0	0	0	0	0	0	0	0	0	0	0
64	16653.5	95.45	85.53	105.37	5.06	0	0	0	0	0	0	0	0	0	0	0	0	0	0	0	0	0	0	0	0	0	0	0	0	0	0	0	0	0	0	0	0	0	0	0	0	0	0	0
65	16913.7	95.91	85.92	105.9	5.1	0	0	0	0	0	0	0	0	0	0	0	0	0	0	0	0	0	0	0	0	0	0	0	0	0	0	0	0	0	0	0	0	0	0	0	0	0	0	0
66	17173.9	96.37	86.31	106.42	5.13	0	0	0	0	0	0	0	0	0	0	0	0	0	0	0	0	0	0	0	0	0	0	0	0	0	0	0	0	0	0	0	0	0	0	0	0	0	0	0
67	17434.1	96.81	86.68	106.94	5.17	0	0	0	0	0	0	0	0	0	0	0	0	0	0	0	0	0	0	0	0	0	0	0	0	0	0	0	0	0	0	0	0	0	0	0	0	0	0	0
68	17694.3	97.25	87.05	107.45	5.21	0	0	0	0	0	0	0	0	0	0	0	0	0	0	0	0	0	0	0	0	0	0	0	0	0	0	0	0	0	0	0	0	0	0	0	0	0	0	0
69	17954.5	97.68	87.41	107.96	5.24	0	0	0	0	0	0	0	0	0	0	0	0	0	0	0	0	0	0	0	0	0	0	0	0	0	0	0	0	0	0	0	0	0	0	0	0	0	0	0
70	18214.7	98.11	87.75	108.46	5.28	0	0	0	0	0	0	0	0	0	0	0	0	0	0	0	0	0	0	0	0	0	0	0	0	0	0	0	0	0	0	0	0	0	0	0	0	0	0	0
71	18475	98.52	88.09	108.95	5.32	0	0	0	0	0	0	0	0	0	0	0	0	0	0	0	0	0	0	0	0	0	0	0	0	0	0	0	0	0	0	0	0	0	0	0	0	0	0	0
72	18735.2	98.93	88.42	109.44	5.36	0	0	0	0	0	0	0	0	0	0	0	0	0	0	0	0	0	0	0	0	0	0	0	0	0	0	0	0	0	0	0	0	0	0	0	0	0	0	0
73	18995.4	99.34	88.75	109.93	5.4	0	0	0	0	0	0	0	0	0	0	0	0	0	0	0	0	0	0	0	0	0	0	0	0	0	0	0	0	0	0	0	0	0	0	0	0	0	0	0
74	19255.6	99.74	89.06	110.41	5.45	0	0	0	0	0	0	0	0	0	0	0	0	0	0	0	0	0	0	0	0	0	0	0	0	0	0	0	0	0	0	0	0	0	0	0	0	0	0	0
75	19515.8	100.13	89.37	110.89	5.49	0	0	0	0	0	0	0	0	0	0	0	0	0	0	0	0	0	0	0	0	0	0	0	0	0	0	0	0	0	0	0	0	0	0	0	0	0	0	0
76	19776	100.51	89.66	111.36	5.53	0	0	0	0	0	0	0	0	0	0	0	0	0	0	0	0	0	0	0	0	0	0	0	0	0	0	0	0	0	0	0	0	0	0	0	0	0	0	0
77	20036.2	100.89	89.95	111.83	5.58	0	0	0	0	0	0	0	0	0	0	0	0	0	0	0	0	0	0	0	0	0	0	0	0	0	0	0	0	0	0	0	0	0	0	0	0	0	0	0
78	20296.4	101.26	90.24	112.29	5.63	0	0	0	0	0	0	0	0	0	0	0	0	0	0	0	0	0	0	0	0	0	0	0	0	0	0	0	0	0	0	0	0	0	0	0	0	0	0	0
79	20556.6	101.63	90.51	112.75	5.67	0	0	0	0	0	0	0	0	0	0	0	0	0	0	0	0	0	0	0	0	0	0	0	0	0	0	0	0	0	0	0	0	0	0	0	0	0	0	0
80	20816.8	101.99	90.78	113.2	5.72	0	0	0	0	0	0	0	0	0	0	0	0	0	0	0	0	0	0	0	0	0	0	0	0	0	0	0	0	0	0	0	0	0	0	0	0	0	0	0
81	21077	102.34	91.03	113.65	5.77	0	0	0	0	0	0	0	0	0	0	0	0	0	0	0	0	0	0	0	0	0	0	0	0	0	0	0	0	0	0	0	0	0	0	0	0	0	0	0
82	21337.3	102.69	91.29	114.09	5.82	0	0	0	0	0	0	0	0	0	0	0	0	0	0	0	0	0	0	0	0	0	0	0	0	0	0	0	0	0	0	0	0	0	0	0	0	0	0	0
83	21597.5	103.03	91.53	114.53	5.87	0	0	0	0	0	0	0	0	0	0	0	0	0	0	0	0	0	0	0	0	0	0	0	0	0	0	0	0	0	0	0	0	0	0	0	0	0	0	0
84	21857.7	103.37	91.77	114.97	5.92	0	0	0	0	0	0	0	0	0	0	0	0	0	0	0	0	0	0	0	0	0	0	0	0	0	0	0	0	0	0	0	0	0	0	0	0	0	0	0
85	22117.9	103.7	92	115.4	5.97	0	0	0	0	0	0	0	0	0	0	0	0	0	0	0	0	0	0	0	0	0	0	0	0	0	0	0	0	0	0	0	0	0	0	0	0	0	0	0
86	22378.1	104.03	92.22	115.83	6.02	0	0	0	0	0	0	0	0	0	0	0	0	0	0	0	0	0	0	0	0	0	0	0	0	0	0	0	0	0	0	0	0	0	0	0	0	0	0	0
87	22638.3	104.35	92.44	116.25	6.08	0	0	0	0	0	0	0	0	0	0	0	0	0	0	0	0	0	0	0	0	0	0	0	0	0	0	0	0	0	0	0	0	0	0	0	0	0	0	0
88	22898.5	104.66	92.65	116.67	6.13	0	0	0	0	0	0	0	0	0	0	0	0	0	0	0	0	0	0	0	0	0	0	0	0	0	0	0	0	0	0	0	0	0	0	0	0	0	0	0
89	23158.7	104.97	92.85	117.09	6.18	0	0	0	0	0	0	0	0	0	0	0	0	0	0	0	0	0	0	0	0	0	0	0	0	0	0	0	0	0	0	0	0	0	0	0	0	0	0	0
90	23419	105.28	93.05	117.5	6.24	0	0	0	0	0	0	0	0	0	0	0	0	0	0	0	0	0	0	0	0	0	0	0	0	0	0	0	0	0	0	0	0	0	0	0	0	0	0	0
91	23679.2	105.58	93.24	117.91	6.29	0	0	0	0	0	0	0	0	0	0	0	0	0	0	0	0	0	0	0	0	0	0	0	0	0	0	0	0	0	0	0	0	0	0	0	0	0	0	0
92	23939.4	105.87	93.43	118.32	6.35	0	0	0	0	0	0	0	0	0	0	0	0	0	0	0	0	0	0	0	0	0	0	0	0	0	0	0	0	0	0	0	0	0	0	0	0	0	0	0
93	24199.6	106.16	93.61	118.72	6.41	0	0	0	0	0	0	0	0	0	0	0	0	0	0	0	0	0	0	0	0	0	0	0	0	0	0	0	0	0	0	0	0	0	0	0	0	0	0	0
94	24459.8	106.45	93.78	119.12	6.46	0	0	0	0	0	0	0	0	0	0	0	0	0	0	0	0	0	0	0	0	0	0	0	0	0	0	0	0	0	0	0	0	0	0	0	0	0	0	0
95	24720	106.73	93.95	119.51	6.52	0	0	0	0	0	0	0	0	0	0	0	0	0	0	0	0	0	0	0	0	0	0	0	0	0	0	0	0	0	0	0	0	0	0	0	0	0	0	0
96	24980.2	107	94.11	119.9	6.58	0	0	0	0	0	0	0	0	0	0	0	0	0	0	0	0	0	0	0	0	0	0	0	0	0	0	0	0	0	0	0	0	0	0	0	0	0	0	0
97	25240.4	107.28	94.27	120.29	6.64	0	0	0	0	0	0	0	0	0	0	0	0	0	0	0	0	0	0	0	0	0	0	0	0	0	0	0	0	0	0	0	0	0	0	0	0	0	0	0
98	25500.6	107.54	94.42	120.67	6.7	0	0	0	0	0	0	0	0	0	0	0	0	0	0	0	0	0	0	0	0	0	0	0	0	0	0	0	0	0	0	0	0	0	0	0	0	0	0	0
99	25760.8	107.81	94.57	121.05	6.76	0	0	0	0	0	0	0	0	0	0	0	0	0	0	0	0	0	0	0	0	0	0	0	0	0	0	0	0	0	0	0	0	0	0	0	0	0	0	0
100	26021	108.07	94.71	121.42	6.81	0	0	0	0	0	0	0	0	0	0	0	0	0	0	0	0	0	0	0	0	0	0	0	0	0	0	0	0	0	0	0	0	0	0	0	0	0	0	0
101	26281.3	108.32	94.85	121.79	6.87	0	0	0	0	0	0	0	0	0	0	0	0	0	0	0	0	0	0	0	0	0	0	0	0	0	0	0	0	0	0	0	0	0	0	0	0	0	0	0
102	26541.5	108.57	94.98	122.16	6.93	0	0	0	0	0	0	0	0	0	0	0	0	0	0	0	0	0	0	0	0	0	0	0	0	0	0	0	0	0	0	0	0	0	0	0	0	0	0	0
103	26801.7	108.82	95.1	122.53	7	0	0	0	0	0	0	0	0	0	0	0	0	0	0	0	0	0	0	0	0	0	0	0	0	0	0	0	0	0	0	0	0	0	0	0	0	0	0	0
104	27061.9	109.06	95.23	122.89	7.06	0	0	0	0	0	0	0	0	0	0	0	0	0	0	0	0	0	0	0	0	0	0	0	0	0	0	0	0	0	0	0	0	0	0	0	0	0	0	0
105	27322.1	109.3	95.35	123.25	7.12	0	0	0	0	0	0	0	0	0	0	0	0	0	0	0	0	0	0	0	0	0	0	0	0	0	0	0	0	0	0	0	0	0	0	0	0	0	0	0
106	27582.3	109.53	95.46	123.6	7.18	0	0	0	0	0	0	0	0	0	0	0	0	0	0	0	0	0	0	0	0	0	0	0	0	0	0	0	0	0	0	0	0	0	0	0	0	0	0	0
107	27842.5	109.76	95.57	123.95	7.24	0	0	0	0	0	0	0	0	0	0	0	0	0	0	0	0	0	0	0	0	0	0	0	0	0	0	0	0	0	0	0	0	0	0	0	0	0	0	0
108	28102.7	109.99	95.67	124.3	7.3	0	0	0	0	0	0	0	0	0	0	0	0	0	0	0	0	0	0	0	0	0	0	0	0	0	0	0	0	0	0	0	0	0	0	0	0	0	0	0
109	28363	110.21	95.78	124.64	7.36	0	0	0	0	0	0	0	0	0	0	0	0	0	0	0	0	0	0	0	0	0	0	0	0	0	0	0	0	0	0	0	0	0	0	0	0	0	0	0
110	28623.2	110.43	95.87	124.98	7.43	0	0	0	0	0	0	0	0	0	0	0	0	0	0	0	0	0	0	0	0	0	0	0	0	0	0	0	0	0	0	0	0	0	0	0	0	0	0	0
111	28883.4	110.64	95.97	125.32	7.49	0	0	0	0	0	0	0	0	0	0	0	0	0	0	0	0	0	0	0	0	0	0	0	0	0	0	0	0	0	0	0	0	0	0	0	0	0	0	0
112	29143.6	110.86	96.06	125.66	7.55	0	0	0	0	0	0	0	0	0	0	0	0	0	0	0	0	0	0	0	0	0	0	0	0	0	0	0	0	0	0	0	0	0	0	0	0	0	0	0
113	29403.8	111.06	96.14	125.99	7.61	0	0	0	0	0	0	0	0	0	0	0	0	0	0	0	0	0	0	0	0	0	0	0	0	0	0	0	0	0	0	0	0	0	0	0	0	0	0	0
114	29664	111.27	96.23	126.31	7.68	0	0	0	0	0	0	0	0	0	0	0	0	0	0	0	0	0	0	0	0	0	0	0	0	0	0	0	0	0	0	0	0	0	0	0	0	0	0	0
115	29924.2	111.47	96.31	126.64	7.74	0	0	0	0	0	0	0	0	0	0	0	0	0	0	0	0	0	0	0	0	0	0	0	0	0	0	0	0	0	0	0	0	0	0	0	0	0	0	0
116	30184.4	111.67	96.38	126.96	7.8	0	0	0	0	0	0	0	0	0	0	0	0	0	0	0	0	0	0	0	0	0	0	0	0	0	0	0	0	0	0	0	0	0	0	0	0	0	0	0
117	30444.6	111.87	96.45	127.28	7.86	0	0	0	0	0	0	0	0	0	0	0	0	0	0	0	0	0	0	0	0	0	0	0	0	0	0	0	0	0	0	0	0	0	0	0	0	0	0	0
118	30704.8	112.06	96.52	127.59	7.93	0	0	0	0	0	0	0	0	0	0	0	0	0	0	0	0	0	0	0	0	0	0	0	0	0	0	0	0	0	0	0	0	0	0	0	0	0	0	0
119	30965	112.25	96.59	127.9	7.99	0	0	0	0	0	0	0	0	0	0	0	0	0	0	0	0	0	0	0	0	0	0	0	0	0	0	0	0	0	0	0	0	0	0	0	0	0	0	0
120	31225.3	112.43	96.65	128.21	8.05	0	0	0	0	0	0	0	0	0	0	0	0	0	0	0	0	0	0	0	0	0	0	0	0	0	0	0	0	0	0	0	0	0	0	0	0	0	0	0
121	31485.5	112.61	96.71	128.52	8.11	0	0	0	0	0	0	0	0	0	0	0	0	0	0	0	0	0	0	0	0	0	0	0	0	0	0	0	0	0	0	0	0	0	0	0	0	0	0	0
122	31745.7	112.79	96.77	128.82	8.17	0	0	0	0	0	0	0	0	0	0	0	0	0	0	0	0	0	0	0	0	0	0	0	0	0	0	0	0	0	0	0	0	0	0	0	0	0	0	0
123	32005.9	112.97	96.83	129.12	8.24	0	0	0	0	0	0	0	0	0	0	0	0	0	0	0	0	0	0	0	0	0	0	0	0	0	0	0	0	0	0	0	0	0	0	0	0	0	0	0
124	32266.1	113.15	96.88	129.41	8.3	0	0	0	0	0	0	0	0	0	0	0	0	0	0	0	0	0	0	0	0	0	0	0	0	0	0	0	0	0	0	0	0	0	0	0	0	0	0	0
125	32526.3	113.32	96.93	129.7	8.36	0	0	0	0	0	0	0	0	0	0	0	0	0	0	0	0	0	0	0	0	0	0	0	0	0	0	0	0	0	0	0	0	0	0	0	0	0	0	0
126	32786.5	113.48	96.97	129.99	8.42	0	0	0	0	0	0	0	0	0	0	0	0	0	0	0	0	0	0	0	0	0	0	0	0	0	0	0	0	0	0	0	0	0	0	0	0	0	0	0
127	33046.7	113.65	97.02	130.28	8.49	0	0	0	0	0	0	0	0	0	0	0	0	0	0	0	0	0	0	0	0	0	0	0	0	0	0	0	0	0	0	0	0	0	0	0	0	0	0	0
128	33306.9	113.81	97.06	130.56	8.55	0	0	0	0	0	0	0	0	0	0	0	0	0	0	0	0	0	0	0	0	0	0	0	0	0	0	0	0	0	0	0	0	0	0	0	0	0	0	0
129	33567.2	113.97	97.1	130.85	8.61	0	0	0	0	0	0	0	0	0	0	0	0	0	0	0	0	0	0	0	0	0	0	0	0	0	0	0	0	0	0	0	0	0	0	0	0	0	0	0
130	33827.4	114.13	97.14	131.12	8.67	0	0	0	0	0	0	0	0	0	0	0	0	0	0	0	0	0	0	0	0	0	0	0	0	0	0	0	0	0	0	0	0	0	0	0	0	0	0	0
131	34087.6	114.29	97.17	131.4	8.73	0	0	0	0	0	0	0	0	0	0	0	0	0	0	0	0	0	0	0	0	0	0	0	0	0	0	0	0	0	0	0	0	0	0	0	0	0	0	0
132	34347.8	114.44	97.21	131.67	8.79	0	0	0	0	0	0	0	0	0	0	0	0	0	0	0	0	0	0	0	0	0	0	0	0	0	0	0	0	0	0	0	0	0	0	0	0	0	0	0
133	34608	114.59	97.24	131.94	8.85	0	0	0	0	0	0	0	0	0	0	0	0	0	0	0	0	0	0	0	0	0	0	0	0	0	0	0	0	0	0	0	0	0	0	0	0	0	0	0
134	34868.2	114.73	97.27	132.2	8.91	0	0	0	0	0	0	0	0	0	0	0	0	0	0	0	0	0	0	0	0	0	0	0	0	0	0	0	0	0	0	0	0	0	0	0	0	0	0	0
135	35128.4	114.88	97.29	132.47	8.97	0	0	0	0	0	0	0	0	0	0	0	0	0	0	0	0	0	0	0	0	0	0	0	0	0	0	0	0	0	0	0	0	0	0	0	0	0	0	0
136	35388.6	115.02	97.32	132.73	9.03	0	0	0	0	0	0	0	0	0	0	0	0	0	0	0	0	0	0	0	0	0	0	0	0	0	0	0	0	0	0	0	0	0	0	0	0	0	0	0
137	35648.8	115.16	97.34	132.98	9.09	0	0	0	0	0	0	0	0	0	0	0	0	0	0	0	0	0	0	0	0	0	0	0	0	0	0	0	0	0	0	0	0	0	0	0	0	0	0	0
138	35909.1	115.3	97.36	133.24	9.15	0	0	0	0	0	0	0	0	0	0	0	0	0	0	0	0	0	0	0	0	0	0	0	0	0	0	0	0	0	0	0	0	0	0	0	0	0	0	0
139	36169.3	115.44	97.38	133.49	9.21	0	0	0	0	0	0	0	0	0	0	0	0	0	0	0	0	0	0	0	0	0	0	0	0	0	0	0	0	0	0	0	0	0	0	0	0	0	0	0
140	36429.5	115.57	97.4	133.74	9.27	0	0	0	0	0	0	0	0	0	0	0	0	0	0	0	0	0	0	0	0	0	0	0	0	0	0	0	0	0	0	0	0	0	0	0	0	0	0	0
141	36689.7	115.7	97.42	133.99	9.33	0	0	0	0	0	0	0	0	0	0	0	0	0	0	0	0	0	0	0	0	0	0	0	0	0	0	0	0	0	0	0	0	0	0	0	0	0	0	0
142	36949.9	115.83	97.43	134.23	9.39	0	0	0	0	0	0	0	0	0	0	0	0	0	0	0	0	0	0	0	0	0	0	0	0	0	0	0	0	0	0	0	0	0	0	0	0	0	0	0
143	37210.1	115.96	97.44	134.47	9.45	0	0	0	0	0	0	0	0	0	0	0	0	0	0	0	0	0	0	0	0	0	0	0	0	0	0	0	0	0	0	0	0	0	0	0	0	0	0	0
144	37470.3	116.08	97.45	134.71	9.5	0	0	0	0	0	0	0	0	0	0	0	0	0	0	0	0	0	0	0	0	0	0	0	0	0	0	0	0	0	0	0	0	0	0	0	0	0	0	0
145	37730.5	116.21	97.47	134.95	9.56	0	0	0	0	0	0	0	0	0	0	0	0	0	0	0	0	0	0	0	0	0	0	0	0	0	0	0	0	0	0	0	0	0	0	0	0	0	0	0
146	37990.7	116.33	97.47	135.18	9.62	0	0	0	0	0	0	0	0	0	0	0	0	0	0	0	0	0	0	0	0	0	0	0	0	0	0	0	0	0	0	0	0	0	0	0	0	0	0	0
147	38250.9	116.45	97.48	135.41	9.68	0	0	0	0	0	0	0	0	0	0	0	0	0	0	0	0	0	0	0	0	0	0	0	0	0	0	0	0	0	0	0	0	0	0	0	0	0	0	0
148	38511.2	116.56	97.49	135.64	9.73	0	0	0	0	0	0	0	0	0	0	0	0	0	0	0	0	0	0	0	0	0	0	0	0	0	0	0	0	0	0	0	0	0	0	0	0	0	0	0
149	38771.4	116.68	97.49	135.86	9.79	0	0	0	0	0	0	0	0	0	0	0	0	0	0	0	0	0	0	0	0	0	0	0	0	0	0	0	0	0	0	0	0	0	0	0	0	0	0	0
150	39031.6	116.79	97.5	136.09	9.84	0	0	0	0	0	0	0	0	0	0	0	0	0	0	0	0	0	0	0	0	0	0	0	0	0	0	0	0	0	0	0	0	0	0	0	0	0	0	0
151	39291.8	116.9	97.5	136.31	9.9	0	0	0	0	0	0	0	0	0	0	0	0	0	0	0	0	0	0	0	0	0	0	0	0	0	0	0	0	0	0	0	0	0	0	0	0	0	0	0
152	39552	117.01	97.5	136.52	9.96	0	0	0	0	0	0	0	0	0	0	0	0	0	0	0	0	0	0	0	0	0	0	0	0	0	0	0	0	0	0	0	0	0	0	0	0	0	0	0
153	39812.2	117.12	97.5	136.74	10.01	0	0	0	0	0	0	0	0	0	0	0	0	0	0	0	0	0	0	0	0	0	0	0	0	0	0	0	0	0	0	0	0	0	0	0	0	0	0	0
154	40072.4	117.22	97.5	136.95	10.06	0	0	0	0	0	0	0	0	0	0	0	0	0	0	0	0	0	0	0	0	0	0	0	0	0	0	0	0	0	0	0	0	0	0	0	0	0	0	0
155	40332.6	117.33	97.5	137.16	10.12	0	0	0	0	0	0	0	0	0	0	0	0	0	0	0	0	0	0	0	0	0	0	0	0	0	0	0	0	0	0	0	0	0	0	0	0	0	0	0
156	40592.8	117.43	97.49	137.37	10.17	0	0	0	0	0	0	0	0	0	0	0	0	0	0	0	0	0	0	0	0	0	0	0	0	0	0	0	0	0	0	0	0	0	0	0	0	0	0	0
157	40853.1	117.53	97.49	137.58	10.23	0	0	0	0	0	0	0	0	0	0	0	0	0	0	0	0	0	0	0	0	0	0	0	0	0	0	0	0	0	0	0	0	0	0	0	0	0	0	0
158	41113.3	117.63	97.48	137.78	10.28	0	0	0	0	0	0	0	0	0	0	0	0	0	0	0	0	0	0	0	0	0	0	0	0	0	0	0	0	0	0	0	0	0	0	0	0	0	0	0
159	41373.5	117.73	97.48	137.98	10.33	0	0	0	0	0	0	0	0	0	0	0	0	0	0	0	0	0	0	0	0	0	0	0	0	0	0	0	0	0	0	0	0	0	0	0	0	0	0	0
160	41633.7	117.82	97.47	138.18	10.38	0	0	0	0	0	0	0	0	0	0	0	0	0	0	0	0	0	0	0	0	0	0	0	0	0	0	0	0	0	0	0	0	0	0	0	0	0	0	0
161	41893.9	117.92	97.46	138.37	10.44	0	0	0	0	0	0	0	0	0	0	0	0	0	0	0	0	0	0	0	0	0	0	0	0	0	0	0	0	0	0	0	0	0	0	0	0	0	0	0
162	42154.1	118.01	97.45	138.57	10.49	0	0	0	0	0	0	0	0	0	0	0	0	0	0	0	0	0	0	0	0	0	0	0	0	0	0	0	0	0	0	0	0	0	0	0	0	0	0	0
163	42414.3	118.1	97.45	138.76	10.54	0	0	0	0	0	0	0	0	0	0	0	0	0	0	0	0	0	0	0	0	0	0	0	0	0	0	0	0	0	0	0	0	0	0	0	0	0	0	0
164	42674.5	118.19	97.44	138.95	10.59	0	0	0	0	0	0	0	0	0	0	0	0	0	0	0	0	0	0	0	0	0	0	0	0	0	0	0	0	0	0	0	0	0	0	0	0	0	0	0
165	42934.7	118.28	97.43	139.14	10.64	0	0	0	0	0	0	0	0	0	0	0	0	0	0	0	0	0	0	0	0	0	0	0	0	0	0	0	0	0	0	0	0	0	0	0	0	0	0	0
166	43194.9	118.37	97.41	139.32	10.69	0	0	0	0	0	0	0	0	0	0	0	0	0	0	0	0	0	0	0	0	0	0	0	0	0	0	0	0	0	0	0	0	0	0	0	0	0	0	0
167	43455.2	118.45	97.4	139.5	10.74	0	0	0	0	0	0	0	0	0	0	0	0	0	0	0	0	0	0	0	0	0	0	0	0	0	0	0	0	0	0	0	0	0	0	0	0	0	0	0
168	43715.4	118.54	97.39	139.69	10.79	0	0	0	0	0	0	0	0	0	0	0	0	0	0	0	0	0	0	0	0	0	0	0	0	0	0	0	0	0	0	0	0	0	0	0	0	0	0	0
169	43975.6	118.62	97.38	139.86	10.84	0	0	0	0	0	0	0	0	0	0	0	0	0	0	0	0	0	0	0	0	0	0	0	0	0	0	0	0	0	0	0	0	0	0	0	0	0	0	0
170	44235.8	118.7	97.36	140.04	10.89	0	0	0	0	0	0	0	0	0	0	0	0	0	0	0	0	0	0	0	0	0	0	0	0	0	0	0	0	0	0	0	0	0	0	0	0	0	0	0
171	44496	118.78	97.35	140.22	10.94	0	0	0	0	0	0	0	0	0	0	0	0	0	0	0	0	0	0	0	0	0	0	0	0	0	0	0	0	0	0	0	0	0	0	0	0	0	0	0
172	44756.2	118.86	97.33	140.39	10.98	0	0	0	0	0	0	0	0	0	0	0	0	0	0	0	0	0	0	0	0	0	0	0	0	0	0	0	0	0	0	0	0	0	0	0	0	0	0	0
173	45016.4	118.94	97.32	140.56	11.03	0	0	0	0	0	0	0	0	0	0	0	0	0	0	0	0	0	0	0	0	0	0	0	0	0	0	0	0	0	0	0	0	0	0	0	0	0	0	0
174	45276.6	119.01	97.3	140.73	11.08	0	0	0	0	0	0	0	0	0	0	0	0	0	0	0	0	0	0	0	0	0	0	0	0	0	0	0	0	0	0	0	0	0	0	0	0	0	0	0
175	45536.8	119.09	97.28	140.89	11.12	0	0	0	0	0	0	0	0	0	0	0	0	0	0	0	0	0	0	0	0	0	0	0	0	0	0	0	0	0	0	0	0	0	0	0	0	0	0	0
176	45797.1	119.16	97.27	141.06	11.17	0	0	0	0	0	0	0	0	0	0	0	0	0	0	0	0	0	0	0	0	0	0	0	0	0	0	0	0	0	0	0	0	0	0	0	0	0	0	0
177	46057.3	119.23	97.25	141.22	11.22	0	0	0	0	0	0	0	0	0	0	0	0	0	0	0	0	0	0	0	0	0	0	0	0	0	0	0	0	0	0	0	0	0	0	0	0	0	0	0
178	46317.5	119.31	97.23	141.38	11.26	0	0	0	0	0	0	0	0	0	0	0	0	0	0	0	0	0	0	0	0	0	0	0	0	0	0	0	0	0	0	0	0	0	0	0	0	0	0	0
179	46577.7	119.38	97.21	141.54	11.31	0	0	0	0	0	0	0	0	0	0	0	0	0	0	0	0	0	0	0	0	0	0	0	0	0	0	0	0	0	0	0	0	0	0	0	0	0	0	0
180	46837.9	119.44	97.19	141.69	11.35	0	0	0	0	0	0	0	0	0	0	0	0	0	0	0	0	0	0	0	0	0	0	0	0	0	0	0	0	0	0	0	0	0	0	0	0	0	0	0
181	47098.1	119.51	97.18	141.85	11.4	0	0	0	0	0	0	0	0	0	0	0	0	0	0	0	0	0	0	0	0	0	0	0	0	0	0	0	0	0	0	0	0	0	0	0	0	0	0	0
182	47358.3	119.58	97.16	142	11.44	0	0	0	0	0	0	0	0	0	0	0	0	0	0	0	0	0	0	0	0	0	0	0	0	0	0	0	0	0	0	0	0	0	0	0	0	0	0	0
183	47618.5	119.64	97.14	142.15	11.48	0	0	0	0	0	0	0	0	0	0	0	0	0	0	0	0	0	0	0	0	0	0	0	0	0	0	0	0	0	0	0	0	0	0	0	0	0	0	0
184	47878.7	119.71	97.12	142.3	11.53	0	0	0	0	0	0	0	0	0	0	0	0	0	0	0	0	0	0	0	0	0	0	0	0	0	0	0	0	0	0	0	0	0	0	0	0	0	0	0
185	48138.9	119.77	97.1	142.45	11.57	0	0	0	0	0	0	0	0	0	0	0	0	0	0	0	0	0	0	0	0	0	0	0	0	0	0	0	0	0	0	0	0	0	0	0	0	0	0	0
186	48399.2	119.83	97.08	142.59	11.61	0	0	0	0	0	0	0	0	0	0	0	0	0	0	0	0	0	0	0	0	0	0	0	0	0	0	0	0	0	0	0	0	0	0	0	0	0	0	0
187	48659.4	119.9	97.05	142.74	11.65	0	0	0	0	0	0	0	0	0	0	0	0	0	0	0	0	0	0	0	0	0	0	0	0	0	0	0	0	0	0	0	0	0	0	0	0	0	0	0
188	48919.6	119.96	97.03	142.88	11.7	0	0	0	0	0	0	0	0	0	0	0	0	0	0	0	0	0	0	0	0	0	0	0	0	0	0	0	0	0	0	0	0	0	0	0	0	0	0	0
189	49179.8	120.02	97.01	143.02	11.74	0	0	0	0	0	0	0	0	0	0	0	0	0	0	0	0	0	0	0	0	0	0	0	0	0	0	0	0	0	0	0	0	0	0	0	0	0	0	0
190	49440	120.07	96.99	143.16	11.78	0	0	0	0	0	0	0	0	0	0	0	0	0	0	0	0	0	0	0	0	0	0	0	0	0	0	0	0	0	0	0	0	0	0	0	0	0	0	0
191	49700.2	120.13	96.97	143.3	11.82	0	0	0	0	0	0	0	0	0	0	0	0	0	0	0	0	0	0	0	0	0	0	0	0	0	0	0	0	0	0	0	0	0	0	0	0	0	0	0
192	49960.4	120.19	96.95	143.43	11.86	0	0	0	0	0	0	0	0	0	0	0	0	0	0	0	0	0	0	0	0	0	0	0	0	0	0	0	0	0	0	0	0	0	0	0	0	0	0	0
193	50220.6	120.24	96.92	143.56	11.9	0	0	0	0	0	0	0	0	0	0	0	0	0	0	0	0	0	0	0	0	0	0	0	0	0	0	0	0	0	0	0	0	0	0	0	0	0	0	0
194	50480.8	120.3	96.9	143.7	11.94	0	0	0	0	0	0	0	0	0	0	0	0	0	0	0	0	0	0	0	0	0	0	0	0	0	0	0	0	0	0	0	0	0	0	0	0	0	0	0
195	50741.1	120.35	96.88	143.83	11.98	0	0	0	0	0	0	0	0	0	0	0	0	0	0	0	0	0	0	0	0	0	0	0	0	0	0	0	0	0	0	0	0	0	0	0	0	0	0	0
196	51001.3	120.41	96.86	143.95	12.01	0	0	0	0	0	0	0	0	0	0	0	0	0	0	0	0	0	0	0	0	0	0	0	0	0	0	0	0	0	0	0	0	0	0	0	0	0	0	0
197	51261.5	120.46	96.83	144.08	12.05	0	0	0	0	0	0	0	0	0	0	0	0	0	0	0	0	0	0	0	0	0	0	0	0	0	0	0	0	0	0	0	0	0	0	0	0	0	0	0
198	51521.7	120.51	96.81	144.21	12.09	0	0	0	0	0	0	0	0	0	0	0	0	0	0	0	0	0	0	0	0	0	0	0	0	0	0	0	0	0	0	0	0	0	0	0	0	0	0	0
199	51781.9	120.56	96.79	144.33	12.13	0	0	0	0	0	0	0	0	0	0	0	0	0	0	0	0	0	0	0	0	0	0	0	0	0	0	0	0	0	0	0	0	0	0	0	0	0	0	0
200	52042.1	120.61	96.76	144.45	12.17	0	0	0	0	0	0	0	0	0	0	0	0	0	0	0	0	0	0	0	0	0	0	0	0	0	0	0	0	0	0	0	0	0	0	0	0	0	0	0
201	52302.3	120.66	96.74	144.57	12.2	0	0	0	0	0	0	0	0	0	0	0	0	0	0	0	0	0	0	0	0	0	0	0	0	0	0	0	0	0	0	0	0	0	0	0	0	0	0	0
202	52562.5	120.7	96.72	144.69	12.24	0	0	0	0	0	0	0	0	0	0	0	0	0	0	0	0	0	0	0	0	0	0	0	0	0	0	0	0	0	0	0	0	0	0	0	0	0	0	0
203	52822.7	120.75	96.69	144.81	12.27	0	0	0	0	0	0	0	0	0	0	0	0	0	0	0	0	0	0	0	0	0	0	0	0	0	0	0	0	0	0	0	0	0	0	0	0	0	0	0
204	53082.9	120.8	96.67	144.93	12.31	0	0	0	0	0	0	0	0	0	0	0	0	0	0	0	0	0	0	0	0	0	0	0	0	0	0	0	0	0	0	0	0	0	0	0	0	0	0	0
205	53343.2	120.84	96.65	145.04	12.35	0	0	0	0	0	0	0	0	0	0	0	0	0	0	0	0	0	0	0	0	0	0	0	0	0	0	0	0	0	0	0	0	0	0	0	0	0	0	0
206	53603.4	120.89	96.62	145.15	12.38	0	0	0	0	0	0	0	0	0	0	0	0	0	0	0	0	0	0	0	0	0	0	0	0	0	0	0	0	0	0	0	0	0	0	0	0	0	0	0
207	53863.6	120.93	96.6	145.27	12.42	0	0	0	0	0	0	0	0	0	0	0	0	0	0	0	0	0	0	0	0	0	0	0	0	0	0	0	0	0	0	0	0	0	0	0	0	0	0	0
208	54123.8	120.98	96.58	145.38	12.45	0	0	0	0	0	0	0	0	0	0	0	0	0	0	0	0	0	0	0	0	0	0	0	0	0	0	0	0	0	0	0	0	0	0	0	0	0	0	0
209	54384	121.02	96.55	145.49	12.48	0	0	0	0	0	0	0	0	0	0	0	0	0	0	0	0	0	0	0	0	0	0	0	0	0	0	0	0	0	0	0	0	0	0	0	0	0	0	0
210	54644.2	121.06	96.53	145.59	12.52	0	0	0	0	0	0	0	0	0	0	0	0	0	0	0	0	0	0	0	0	0	0	0	0	0	0	0	0	0	0	0	0	0	0	0	0	0	0	0
211	54904.4	121.1	96.5	145.7	12.55	0	0	0	0	0	0	0	0	0	0	0	0	0	0	0	0	0	0	0	0	0	0	0	0	0	0	0	0	0	0	0	0	0	0	0	0	0	0	0
212	55164.6	121.14	96.48	145.81	12.58	0	0	0	0	0	0	0	0	0	0	0	0	0	0	0	0	0	0	0	0	0	0	0	0	0	0	0	0	0	0	0	0	0	0	0	0	0	0	0
213	55424.8	121.18	96.46	145.91	12.62	0	0	0	0	0	0	0	0	0	0	0	0	0	0	0	0	0	0	0	0	0	0	0	0	0	0	0	0	0	0	0	0	0	0	0	0	0	0	0
214	55685.1	121.22	96.43	146.01	12.65	0	0	0	0	0	0	0	0	0	0	0	0	0	0	0	0	0	0	0	0	0	0	0	0	0	0	0	0	0	0	0	0	0	0	0	0	0	0	0
215	55945.3	121.26	96.41	146.11	12.68	0	0	0	0	0	0	0	0	0	0	0	0	0	0	0	0	0	0	0	0	0	0	0	0	0	0	0	0	0	0	0	0	0	0	0	0	0	0	0
216	56205.5	121.3	96.39	146.21	12.71	0	0	0	0	0	0	0	0	0	0	0	0	0	0	0	0	0	0	0	0	0	0	0	0	0	0	0	0	0	0	0	0	0	0	0	0	0	0	0
217	56465.7	121.34	96.36	146.31	12.74	0	0	0	0	0	0	0	0	0	0	0	0	0	0	0	0	0	0	0	0	0	0	0	0	0	0	0	0	0	0	0	0	0	0	0	0	0	0	0
218	56725.9	121.37	96.34	146.41	12.77	0	0	0	0	0	0	0	0	0	0	0	0	0	0	0	0	0	0	0	0	0	0	0	0	0	0	0	0	0	0	0	0	0	0	0	0	0	0	0
219	56986.1	121.41	96.31	146.5	12.8	0	0	0	0	0	0	0	0	0	0	0	0	0	0	0	0	0	0	0	0	0	0	0	0	0	0	0	0	0	0	0	0	0	0	0	0	0	0	0
220	57246.3	121.44	96.29	146.6	12.83	0	0	0	0	0	0	0	0	0	0	0	0	0	0	0	0	0	0	0	0	0	0	0	0	0	0	0	0	0	0	0	0	0	0	0	0	0	0	0
221	57506.5	121.48	96.27	146.69	12.86	0	0	0	0	0	0	0	0	0	0	0	0	0	0	0	0	0	0	0	0	0	0	0	0	0	0	0	0	0	0	0	0	0	0	0	0	0	0	0
222	57766.7	121.51	96.24	146.78	12.89	0	0	0	0	0	0	0	0	0	0	0	0	0	0	0	0	0	0	0	0	0	0	0	0	0	0	0	0	0	0	0	0	0	0	0	0	0	0	0
223	58026.9	121.55	96.22	146.88	12.92	0	0	0	0	0	0	0	0	0	0	0	0	0	0	0	0	0	0	0	0	0	0	0	0	0	0	0	0	0	0	0	0	0	0	0	0	0	0	0
224	58287.2	121.58	96.2	146.97	12.95	0	0	0	0	0	0	0	0	0	0	0	0	0	0	0	0	0	0	0	0	0	0	0	0	0	0	0	0	0	0	0	0	0	0	0	0	0	0	0
225	58547.4	121.61	96.17	147.05	12.98	0	0	0	0	0	0	0	0	0	0	0	0	0	0	0	0	0	0	0	0	0	0	0	0	0	0	0	0	0	0	0	0	0	0	0	0	0	0	0
226	58807.6	121.65	96.15	147.14	13.01	0	0	0	0	0	0	0	0	0	0	0	0	0	0	0	0	0	0	0	0	0	0	0	0	0	0	0	0	0	0	0	0	0	0	0	0	0	0	0
227	59067.8	121.68	96.13	147.23	13.04	0	0	0	0	0	0	0	0	0	0	0	0	0	0	0	0	0	0	0	0	0	0	0	0	0	0	0	0	0	0	0	0	0	0	0	0	0	0	0
228	59328	121.71	96.1	147.31	13.06	0	0	0	0	0	0	0	0	0	0	0	0	0	0	0	0	0	0	0	0	0	0	0	0	0	0	0	0	0	0	0	0	0	0	0	0	0	0	0
229	59588.2	121.74	96.08	147.4	13.09	0	0	0	0	0	0	0	0	0	0	0	0	0	0	0	0	0	0	0	0	0	0	0	0	0	0	0	0	0	0	0	0	0	0	0	0	0	0	0
230	59848.4	121.77	96.06	147.48	13.12	0	0	0	0	0	0	0	0	0	0	0	0	0	0	0	0	0	0	0	0	0	0	0	0	0	0	0	0	0	0	0	0	0	0	0	0	0	0	0
231	60108.6	121.8	96.03	147.56	13.15	0	0	0	0	0	0	0	0	0	0	0	0	0	0	0	0	0	0	0	0	0	0	0	0	0	0	0	0	0	0	0	0	0	0	0	0	0	0	0
232	60368.8	121.83	96.01	147.64	13.17	0	0	0	0	0	0	0	0	0	0	0	0	0	0	0	0	0	0	0	0	0	0	0	0	0	0	0	0	0	0	0	0	0	0	0	0	0	0	0
233	60629.1	121.86	95.99	147.72	13.2	0	0	0	0	0	0	0	0	0	0	0	0	0	0	0	0	0	0	0	0	0	0	0	0	0	0	0	0	0	0	0	0	0	0	0	0	0	0	0
234	60889.3	121.89	95.97	147.8	13.22	0	0	0	0	0	0	0	0	0	0	0	0	0	0	0	0	0	0	0	0	0	0	0	0	0	0	0	0	0	0	0	0	0	0	0	0	0	0	0
235	61149.5	121.91	95.94	147.88	13.25	0	0	0	0	0	0	0	0	0	0	0	0	0	0	0	0	0	0	0	0	0	0	0	0	0	0	0	0	0	0	0	0	0	0	0	0	0	0	0
236	61409.7	121.94	95.92	147.96	13.27	0	0	0	0	0	0	0	0	0	0	0	0	0	0	0	0	0	0	0	0	0	0	0	0	0	0	0	0	0	0	0	0	0	0	0	0	0	0	0
237	61669.9	121.97	95.9	148.03	13.3	0	0	0	0	0	0	0	0	0	0	0	0	0	0	0	0	0	0	0	0	0	0	0	0	0	0	0	0	0	0	0	0	0	0	0	0	0	0	0
238	61930.1	121.99	95.88	148.11	13.32	0	0	0	0	0	0	0	0	0	0	0	0	0	0	0	0	0	0	0	0	0	0	0	0	0	0	0	0	0	0	0	0	0	0	0	0	0	0	0
239	62190.3	122.02	95.86	148.18	13.35	0	0	0	0	0	0	0	0	0	0	0	0	0	0	0	0	0	0	0	0	0	0	0	0	0	0	0	0	0	0	0	0	0	0	0	0	0	0	0
240	62450.5	122.05	95.83	148.26	13.37	0	0	0	0	0	0	0	0	0	0	0	0	0	0	0	0	0	0	0	0	0	0	0	0	0	0	0	0	0	0	0	0	0	0	0	0	0	0	0
241	62710.7	122.07	95.81	148.33	13.4	0	0	0	0	0	0	0	0	0	0	0	0	0	0	0	0	0	0	0	0	0	0	0	0	0	0	0	0	0	0	0	0	0	0	0	0	0	0	0
242	62970.9	122.1	95.79	148.4	13.42	0	0	0	0	0	0	0	0	0	0	0	0	0	0	0	0	0	0	0	0	0	0	0	0	0	0	0	0	0	0	0	0	0	0	0	0	0	0	0
243	63231.2	122.12	95.77	148.47	13.44	0	0	0	0	0	0	0	0	0	0	0	0	0	0	0	0	0	0	0	0	0	0	0	0	0	0	0	0	0	0	0	0	0	0	0	0	0	0	0
244	63491.4	122.14	95.75	148.54	13.47	0	0	0	0	0	0	0	0	0	0	0	0	0	0	0	0	0	0	0	0	0	0	0	0	0	0	0	0	0	0	0	0	0	0	0	0	0	0	0
245	63751.6	122.17	95.73	148.61	13.49	0	0	0	0	0	0	0	0	0	0	0	0	0	0	0	0	0	0	0	0	0	0	0	0	0	0	0	0	0	0	0	0	0	0	0	0	0	0	0
246	64011.8	122.19	95.71	148.68	13.51	0	0	0	0	0	0	0	0	0	0	0	0	0	0	0	0	0	0	0	0	0	0	0	0	0	0	0	0	0	0	0	0	0	0	0	0	0	0	0
247	64272	122.21	95.68	148.74	13.54	0	0	0	0	0	0	0	0	0	0	0	0	0	0	0	0	0	0	0	0	0	0	0	0	0	0	0	0	0	0	0	0	0	0	0	0	0	0	0
248	64532.2	122.24	95.66	148.81	13.56	0	0	0	0	0	0	0	0	0	0	0	0	0	0	0	0	0	0	0	0	0	0	0	0	0	0	0	0	0	0	0	0	0	0	0	0	0	0	0
249	64792.4	122.26	95.64	148.87	13.58	0	0	0	0	0	0	0	0	0	0	0	0	0	0	0	0	0	0	0	0	0	0	0	0	0	0	0	0	0	0	0	0	0	0	0	0	0	0	0
250	65052.6	122.28	95.62	148.94	13.6	0	0	0	0	0	0	0	0	0	0	0	0	0	0	0	0	0	0	0	0	0	0	0	0	0	0	0	0	0	0	0	0	0	0	0	0	0	0	0
251	65312.8	122.3	95.6	149	13.62	0	0	0	0	0	0	0	0	0	0	0	0	0	0	0	0	0	0	0	0	0	0	0	0	0	0	0	0	0	0	0	0	0	0	0	0	0	0	0
252	65573.1	122.32	95.58	149.06	13.64	0	0	0	0	0	0	0	0	0	0	0	0	0	0	0	0	0	0	0	0	0	0	0	0	0	0	0	0	0	0	0	0	0	0	0	0	0	0	0
253	65833.3	122.34	95.56	149.12	13.66	0	0	0	0	0	0	0	0	0	0	0	0	0	0	0	0	0	0	0	0	0	0	0	0	0	0	0	0	0	0	0	0	0	0	0	0	0	0	0
254	66093.5	122.36	95.54	149.18	13.68	0	0	0	0	0	0	0	0	0	0	0	0	0	0	0	0	0	0	0	0	0	0	0	0	0	0	0	0	0	0	0	0	0	0	0	0	0	0	0
255	66353.7	122.38	95.52	149.24	13.7	0	0	0	0	0	0	0	0	0	0	0	0	0	0	0	0	0	0	0	0	0	0	0	0	0	0	0	0	0	0	0	0	0	0	0	0	0	0	0
256	66613.9	122.4	95.5	149.3	13.72	0	0	0	0	0	0	0	0	0	0	0	0	0	0	0	0	0	0	0	0	0	0	0	0	0	0	0	0	0	0	0	0	0	0	0	0	0	0	0
257	66874.1	122.42	95.48	149.36	13.74	0	0	0	0	0	0	0	0	0	0	0	0	0	0	0	0	0	0	0	0	0	0	0	0	0	0	0	0	0	0	0	0	0	0	0	0	0	0	0
258	67134.3	122.44	95.46	149.42	13.76	0	0	0	0	0	0	0	0	0	0	0	0	0	0	0	0	0	0	0	0	0	0	0	0	0	0	0	0	0	0	0	0	0	0	0	0	0	0	0
259	67394.5	122.46	95.44	149.48	13.78	0	0	0	0	0	0	0	0	0	0	0	0	0	0	0	0	0	0	0	0	0	0	0	0	0	0	0	0	0	0	0	0	0	0	0	0	0	0	0
260	67654.7	122.48	95.42	149.53	13.8	0	0	0	0	0	0	0	0	0	0	0	0	0	0	0	0	0	0	0	0	0	0	0	0	0	0	0	0	0	0	0	0	0	0	0	0	0	0	0
261	67914.9	122.5	95.4	149.59	13.82	0	0	0	0	0	0	0	0	0	0	0	0	0	0	0	0	0	0	0	0	0	0	0	0	0	0	0	0	0	0	0	0	0	0	0	0	0	0	0
262	68175.2	122.51	95.38	149.64	13.84	0	0	0	0	0	0	0	0	0	0	0	0	0	0	0	0	0	0	0	0	0	0	0	0	0	0	0	0	0	0	0	0	0	0	0	0	0	0	0
263	68435.4	122.53	95.37	149.69	13.86	0	0	0	0	0	0	0	0	0	0	0	0	0	0	0	0	0	0	0	0	0	0	0	0	0	0	0	0	0	0	0	0	0	0	0	0	0	0	0
264	68695.6	122.55	95.35	149.75	13.88	0	0	0	0	0	0	0	0	0	0	0	0	0	0	0	0	0	0	0	0	0	0	0	0	0	0	0	0	0	0	0	0	0	0	0	0	0	0	0
265	68955.8	122.56	95.33	149.8	13.9	0	0	0	0	0	0	0	0	0	0	0	0	0	0	0	0	0	0	0	0	0	0	0	0	0	0	0	0	0	0	0	0	0	0	0	0	0	0	0
266	69216	122.58	95.31	149.85	13.91	0	0	0	0	0	0	0	0	0	0	0	0	0	0	0	0	0	0	0	0	0	0	0	0	0	0	0	0	0	0	0	0	0	0	0	0	0	0	0
267	69476.2	122.6	95.29	149.9	13.93	0	0	0	0	0	0	0	0	0	0	0	0	0	0	0	0	0	0	0	0	0	0	0	0	0	0	0	0	0	0	0	0	0	0	0	0	0	0	0
268	69736.4	122.61	95.27	149.95	13.95	0	0	0	0	0	0	0	0	0	0	0	0	0	0	0	0	0	0	0	0	0	0	0	0	0	0	0	0	0	0	0	0	0	0	0	0	0	0	0
269	69996.6	122.63	95.26	150	13.97	0	0	0	0	0	0	0	0	0	0	0	0	0	0	0	0	0	0	0	0	0	0	0	0	0	0	0	0	0	0	0	0	0	0	0	0	0	0	0
270	70256.8	122.64	95.24	150.05	13.98	0	0	0	0	0	0	0	0	0	0	0	0	0	0	0	0	0	0	0	0	0	0	0	0	0	0	0	0	0	0	0	0	0	0	0	0	0	0	0
271	70517.1	122.66	95.22	150.1	14	0	0	0	0	0	0	0	0	0	0	0	0	0	0	0	0	0	0	0	0	0	0	0	0	0	0	0	0	0	0	0	0	0	0	0	0	0	0	0
272	70777.3	122.68	95.2	150.15	14.02	0	0	0	0	0	0	0	0	0	0	0	0	0	0	0	0	0	0	0	0	0	0	0	0	0	0	0	0	0	0	0	0	0	0	0	0	0	0	0
273	71037.5	122.69	95.19	150.19	14.03	0	0	0	0	0	0	0	0	0	0	0	0	0	0	0	0	0	0	0	0	0	0	0	0	0	0	0	0	0	0	0	0	0	0	0	0	0	0	0
274	71297.7	122.7	95.17	150.24	14.05	0	0	0	0	0	0	0	0	0	0	0	0	0	0	0	0	0	0	0	0	0	0	0	0	0	0	0	0	0	0	0	0	0	0	0	0	0	0	0
275	71557.9	122.72	95.15	150.29	14.06	0	0	0	0	0	0	0	0	0	0	0	0	0	0	0	0	0	0	0	0	0	0	0	0	0	0	0	0	0	0	0	0	0	0	0	0	0	0	0
276	71818.1	122.73	95.14	150.33	14.08	0	0	0	0	0	0	0	0	0	0	0	0	0	0	0	0	0	0	0	0	0	0	0	0	0	0	0	0	0	0	0	0	0	0	0	0	0	0	0
277	72078.3	122.75	95.12	150.38	14.1	0	0	0	0	0	0	0	0	0	0	0	0	0	0	0	0	0	0	0	0	0	0	0	0	0	0	0	0	0	0	0	0	0	0	0	0	0	0	0
278	72338.5	122.76	95.1	150.42	14.11	0	0	0	0	0	0	0	0	0	0	0	0	0	0	0	0	0	0	0	0	0	0	0	0	0	0	0	0	0	0	0	0	0	0	0	0	0	0	0
279	72598.7	122.77	95.09	150.46	14.13	0	0	0	0	0	0	0	0	0	0	0	0	0	0	0	0	0	0	0	0	0	0	0	0	0	0	0	0	0	0	0	0	0	0	0	0	0	0	0
280	72858.9	122.79	95.07	150.51	14.14	0	0	0	0	0	0	0	0	0	0	0	0	0	0	0	0	0	0	0	0	0	0	0	0	0	0	0	0	0	0	0	0	0	0	0	0	0	0	0
281	73119.2	122.8	95.05	150.55	14.16	0	0	0	0	0	0	0	0	0	0	0	0	0	0	0	0	0	0	0	0	0	0	0	0	0	0	0	0	0	0	0	0	0	0	0	0	0	0	0
282	73379.4	122.81	95.04	150.59	14.17	0	0	0	0	0	0	0	0	0	0	0	0	0	0	0	0	0	0	0	0	0	0	0	0	0	0	0	0	0	0	0	0	0	0	0	0	0	0	0
283	73639.6	122.83	95.02	150.63	14.19	0	0	0	0	0	0	0	0	0	0	0	0	0	0	0	0	0	0	0	0	0	0	0	0	0	0	0	0	0	0	0	0	0	0	0	0	0	0	0
284	73899.8	122.84	95.01	150.67	14.2	0	0	0	0	0	0	0	0	0	0	0	0	0	0	0	0	0	0	0	0	0	0	0	0	0	0	0	0	0	0	0	0	0	0	0	0	0	0	0
285	74160	122.85	94.99	150.71	14.21	0	0	0	0	0	0	0	0	0	0	0	0	0	0	0	0	0	0	0	0	0	0	0	0	0	0	0	0	0	0	0	0	0	0	0	0	0	0	0
286	74420.2	122.86	94.97	150.75	14.23	0	0	0	0	0	0	0	0	0	0	0	0	0	0	0	0	0	0	0	0	0	0	0	0	0	0	0	0	0	0	0	0	0	0	0	0	0	0	0
287	74680.4	122.87	94.96	150.79	14.24	0	0	0	0	0	0	0	0	0	0	0	0	0	0	0	0	0	0	0	0	0	0	0	0	0	0	0	0	0	0	0	0	0	0	0	0	0	0	0
288	74940.6	122.89	94.94	150.83	14.26	0	0	0	0	0	0	0	0	0	0	0	0	0	0	0	0	0	0	0	0	0	0	0	0	0	0	0	0	0	0	0	0	0	0	0	0	0	0	0
289	75200.8	122.9	94.93	150.86	14.27	0	0	0	0	0	0	0	0	0	0	0	0	0	0	0	0	0	0	0	0	0	0	0	0	0	0	0	0	0	0	0	0	0	0	0	0	0	0	0
290	75461.1	122.91	94.91	150.9	14.28	0	0	0	0	0	0	0	0	0	0	0	0	0	0	0	0	0	0	0	0	0	0	0	0	0	0	0	0	0	0	0	0	0	0	0	0	0	0	0
291	75721.3	122.92	94.9	150.94	14.3	0	0	0	0	0	0	0	0	0	0	0	0	0	0	0	0	0	0	0	0	0	0	0	0	0	0	0	0	0	0	0	0	0	0	0	0	0	0	0
292	75981.5	122.93	94.88	150.98	14.31	0	0	0	0	0	0	0	0	0	0	0	0	0	0	0	0	0	0	0	0	0	0	0	0	0	0	0	0	0	0	0	0	0	0	0	0	0	0	0
293	76241.7	122.94	94.87	151.01	14.32	0	0	0	0	0	0	0	0	0	0	0	0	0	0	0	0	0	0	0	0	0	0	0	0	0	0	0	0	0	0	0	0	0	0	0	0	0	0	0
294	76501.9	122.95	94.86	151.05	14.33	0	0	0	0	0	0	0	0	0	0	0	0	0	0	0	0	0	0	0	0	0	0	0	0	0	0	0	0	0	0	0	0	0	0	0	0	0	0	0
295	76762.1	122.96	94.84	151.08	14.35	0	0	0	0	0	0	0	0	0	0	0	0	0	0	0	0	0	0	0	0	0	0	0	0	0	0	0	0	0	0	0	0	0	0	0	0	0	0	0
296	77022.3	122.97	94.83	151.12	14.36	0	0	0	0	0	0	0	0	0	0	0	0	0	0	0	0	0	0	0	0	0	0	0	0	0	0	0	0	0	0	0	0	0	0	0	0	0	0	0
297	77282.5	122.98	94.81	151.15	14.37	0	0	0	0	0	0	0	0	0	0	0	0	0	0	0	0	0	0	0	0	0	0	0	0	0	0	0	0	0	0	0	0	0	0	0	0	0	0	0
298	77542.7	122.99	94.8	151.18	14.38	0	0	0	0	0	0	0	0	0	0	0	0	0	0	0	0	0	0	0	0	0	0	0	0	0	0	0	0	0	0	0	0	0	0	0	0	0	0	0
299	77802.9	123	94.79	151.22	14.4	0	0	0	0	0	0	0	0	0	0	0	0	0	0	0	0	0	0	0	0	0	0	0	0	0	0	0	0	0	0	0	0	0	0	0	0	0	0	0
300	78063.2	123.01	94.77	151.25	14.41	0	0	0	0	0	0	0	0	0	0	0	0	0	0	0	0	0	0	0	0	0	0	0	0	0	0	0	0	0	0	0	0	0	0	0	0	0	0	0
301	78323.4	123.02	94.76	151.28	14.42	0	0	0	0	0	0	0	0	0	0	0	0	0	0	0	0	0	0	0	0	0	0	0	0	0	0	0	0	0	0	0	0	0	0	0	0	0	0	0
302	78583.6	123.03	94.75	151.31	14.43	0	0	0	0	0	0	0	0	0	0	0	0	0	0	0	0	0	0	0	0	0	0	0	0	0	0	0	0	0	0	0	0	0	0	0	0	0	0	0
303	78843.8	123.04	94.73	151.34	14.44	0	0	0	0	0	0	0	0	0	0	0	0	0	0	0	0	0	0	0	0	0	0	0	0	0	0	0	0	0	0	0	0	0	0	0	0	0	0	0
304	79104	123.05	94.72	151.37	14.45	0	0	0	0	0	0	0	0	0	0	0	0	0	0	0	0	0	0	0	0	0	0	0	0	0	0	0	0	0	0	0	0	0	0	0	0	0	0	0
305	79364.2	123.06	94.71	151.4	14.46	0	0	0	0	0	0	0	0	0	0	0	0	0	0	0	0	0	0	0	0	0	0	0	0	0	0	0	0	0	0	0	0	0	0	0	0	0	0	0
306	79624.4	123.06	94.69	151.43	14.47	0	0	0	0	0	0	0	0	0	0	0	0	0	0	0	0	0	0	0	0	0	0	0	0	0	0	0	0	0	0	0	0	0	0	0	0	0	0	0
307	79884.6	123.07	94.68	151.46	14.48	0	0	0	0	0	0	0	0	0	0	0	0	0	0	0	0	0	0	0	0	0	0	0	0	0	0	0	0	0	0	0	0	0	0	0	0	0	0	0
308	80144.8	123.08	94.67	151.49	14.5	0	0	0	0	0	0	0	0	0	0	0	0	0	0	0	0	0	0	0	0	0	0	0	0	0	0	0	0	0	0	0	0	0	0	0	0	0	0	0
309	80405.1	123.09	94.66	151.52	14.51	0	0	0	0	0	0	0	0	0	0	0	0	0	0	0	0	0	0	0	0	0	0	0	0	0	0	0	0	0	0	0	0	0	0	0	0	0	0	0
310	80665.3	123.1	94.64	151.55	14.52	0	0	0	0	0	0	0	0	0	0	0	0	0	0	0	0	0	0	0	0	0	0	0	0	0	0	0	0	0	0	0	0	0	0	0	0	0	0	0
311	80925.5	123.1	94.63	151.58	14.53	0	0	0	0	0	0	0	0	0	0	0	0	0	0	0	0	0	0	0	0	0	0	0	0	0	0	0	0	0	0	0	0	0	0	0	0	0	0	0
312	81185.7	123.11	94.62	151.6	14.54	0	0	0	0	0	0	0	0	0	0	0	0	0	0	0	0	0	0	0	0	0	0	0	0	0	0	0	0	0	0	0	0	0	0	0	0	0	0	0
313	81445.9	123.12	94.61	151.63	14.55	0	0	0	0	0	0	0	0	0	0	0	0	0	0	0	0	0	0	0	0	0	0	0	0	0	0	0	0	0	0	0	0	0	0	0	0	0	0	0
314	81706.1	123.13	94.6	151.66	14.56	0	0	0	0	0	0	0	0	0	0	0	0	0	0	0	0	0	0	0	0	0	0	0	0	0	0	0	0	0	0	0	0	0	0	0	0	0	0	0
315	81966.3	123.14	94.59	151.68	14.57	0	0	0	0	0	0	0	0	0	0	0	0	0	0	0	0	0	0	0	0	0	0	0	0	0	0	0	0	0	0	0	0	0	0	0	0	0	0	0
316	82226.5	123.14	94.57	151.71	14.58	0	0	0	0	0	0	0	0	0	0	0	0	0	0	0	0	0	0	0	0	0	0	0	0	0	0	0	0	0	0	0	0	0	0	0	0	0	0	0
317	82486.7	123.15	94.56	151.74	14.59	0	0	0	0	0	0	0	0	0	0	0	0	0	0	0	0	0	0	0	0	0	0	0	0	0	0	0	0	0	0	0	0	0	0	0	0	0	0	0
318	82746.9	123.16	94.55	151.76	14.59	0	0	0	0	0	0	0	0	0	0	0	0	0	0	0	0	0	0	0	0	0	0	0	0	0	0	0	0	0	0	0	0	0	0	0	0	0	0	0
319	83007.2	123.16	94.54	151.79	14.6	0	0	0	0	0	0	0	0	0	0	0	0	0	0	0	0	0	0	0	0	0	0	0	0	0	0	0	0	0	0	0	0	0	0	0	0	0	0	0
320	83267.4	123.17	94.53	151.81	14.61	0	0	0	0	0	0	0	0	0	0	0	0	0	0	0	0	0	0	0	0	0	0	0	0	0	0	0	0	0	0	0	0	0	0	0	0	0	0	0
321	83527.6	123.18	94.52	151.84	14.62	0	0	0	0	0	0	0	0	0	0	0	0	0	0	0	0	0	0	0	0	0	0	0	0	0	0	0	0	0	0	0	0	0	0	0	0	0	0	0
322	83787.8	123.18	94.51	151.86	14.63	0	0	0	0	0	0	0	0	0	0	0	0	0	0	0	0	0	0	0	0	0	0	0	0	0	0	0	0	0	0	0	0	0	0	0	0	0	0	0
323	84048	123.19	94.5	151.88	14.64	0	0	0	0	0	0	0	0	0	0	0	0	0	0	0	0	0	0	0	0	0	0	0	0	0	0	0	0	0	0	0	0	0	0	0	0	0	0	0
324	84308.2	123.2	94.49	151.91	14.65	0	0	0	0	0	0	0	0	0	0	0	0	0	0	0	0	0	0	0	0	0	0	0	0	0	0	0	0	0	0	0	0	0	0	0	0	0	0	0
325	84568.4	123.2	94.48	151.93	14.66	0	0	0	0	0	0	0	0	0	0	0	0	0	0	0	0	0	0	0	0	0	0	0	0	0	0	0	0	0	0	0	0	0	0	0	0	0	0	0
326	84828.6	123.21	94.47	151.95	14.66	0	0	0	0	0	0	0	0	0	0	0	0	0	0	0	0	0	0	0	0	0	0	0	0	0	0	0	0	0	0	0	0	0	0	0	0	0	0	0
327	85088.8	123.21	94.46	151.97	14.67	0	0	0	0	0	0	0	0	0	0	0	0	0	0	0	0	0	0	0	0	0	0	0	0	0	0	0	0	0	0	0	0	0	0	0	0	0	0	0
328	85349.1	123.22	94.45	152	14.68	0	0	0	0	0	0	0	0	0	0	0	0	0	0	0	0	0	0	0	0	0	0	0	0	0	0	0	0	0	0	0	0	0	0	0	0	0	0	0
329	85609.3	123.23	94.44	152.02	14.69	0	0	0	0	0	0	0	0	0	0	0	0	0	0	0	0	0	0	0	0	0	0	0	0	0	0	0	0	0	0	0	0	0	0	0	0	0	0	0
330	85869.5	123.23	94.43	152.04	14.7	0	0	0	0	0	0	0	0	0	0	0	0	0	0	0	0	0	0	0	0	0	0	0	0	0	0	0	0	0	0	0	0	0	0	0	0	0	0	0
331	86129.7	123.24	94.42	152.06	14.7	0	0	0	0	0	0	0	0	0	0	0	0	0	0	0	0	0	0	0	0	0	0	0	0	0	0	0	0	0	0	0	0	0	0	0	0	0	0	0
332	86389.9	123.24	94.41	152.08	14.71	0	0	0	0	0	0	0	0	0	0	0	0	0	0	0	0	0	0	0	0	0	0	0	0	0	0	0	0	0	0	0	0	0	0	0	0	0	0	0
333	86650.1	123.25	94.4	152.1	14.72	0	0	0	0	0	0	0	0	0	0	0	0	0	0	0	0	0	0	0	0	0	0	0	0	0	0	0	0	0	0	0	0	0	0	0	0	0	0	0
334	86910.3	123.25	94.39	152.12	14.73	0	0	0	0	0	0	0	0	0	0	0	0	0	0	0	0	0	0	0	0	0	0	0	0	0	0	0	0	0	0	0	0	0	0	0	0	0	0	0
335	87170.5	123.26	94.38	152.14	14.74	0	0	0	0	0	0	0	0	0	0	0	0	0	0	0	0	0	0	0	0	0	0	0	0	0	0	0	0	0	0	0	0	0	0	0	0	0	0	0
336	87430.7	123.27	94.37	152.16	14.74	0	0	0	0	0	0	0	0	0	0	0	0	0	0	0	0	0	0	0	0	0	0	0	0	0	0	0	0	0	0	0	0	0	0	0	0	0	0	0
337	87690.9	123.27	94.36	152.18	14.75	0	0	0	0	0	0	0	0	0	0	0	0	0	0	0	0	0	0	0	0	0	0	0	0	0	0	0	0	0	0	0	0	0	0	0	0	0	0	0
338	87951.2	123.28	94.35	152.2	14.76	0	0	0	0	0	0	0	0	0	0	0	0	0	0	0	0	0	0	0	0	0	0	0	0	0	0	0	0	0	0	0	0	0	0	0	0	0	0	0
339	88211.4	123.28	94.34	152.22	14.76	0	0	0	0	0	0	0	0	0	0	0	0	0	0	0	0	0	0	0	0	0	0	0	0	0	0	0	0	0	0	0	0	0	0	0	0	0	0	0
340	88471.6	123.29	94.33	152.24	14.77	0	0	0	0	0	0	0	0	0	0	0	0	0	0	0	0	0	0	0	0	0	0	0	0	0	0	0	0	0	0	0	0	0	0	0	0	0	0	0
341	88731.8	123.29	94.32	152.26	14.78	0	0	0	0	0	0	0	0	0	0	0	0	0	0	0	0	0	0	0	0	0	0	0	0	0	0	0	0	0	0	0	0	0	0	0	0	0	0	0
342	88992	123.29	94.32	152.27	14.78	0	0	0	0	0	0	0	0	0	0	0	0	0	0	0	0	0	0	0	0	0	0	0	0	0	0	0	0	0	0	0	0	0	0	0	0	0	0	0
343	89252.2	123.3	94.31	152.29	14.79	0	0	0	0	0	0	0	0	0	0	0	0	0	0	0	0	0	0	0	0	0	0	0	0	0	0	0	0	0	0	0	0	0	0	0	0	0	0	0
344	89512.4	123.3	94.3	152.31	14.8	0	0	0	0	0	0	0	0	0	0	0	0	0	0	0	0	0	0	0	0	0	0	0	0	0	0	0	0	0	0	0	0	0	0	0	0	0	0	0
345	89772.6	123.31	94.29	152.33	14.8	0	0	0	0	0	0	0	0	0	0	0	0	0	0	0	0	0	0	0	0	0	0	0	0	0	0	0	0	0	0	0	0	0	0	0	0	0	0	0
346	90032.8	123.31	94.28	152.34	14.81	0	0	0	0	0	0	0	0	0	0	0	0	0	0	0	0	0	0	0	0	0	0	0	0	0	0	0	0	0	0	0	0	0	0	0	0	0	0	0
347	90293.1	123.32	94.27	152.36	14.82	0	0	0	0	0	0	0	0	0	0	0	0	0	0	0	0	0	0	0	0	0	0	0	0	0	0	0	0	0	0	0	0	0	0	0	0	0	0	0
348	90553.3	123.32	94.27	152.38	14.82	0	0	0	0	0	0	0	0	0	0	0	0	0	0	0	0	0	0	0	0	0	0	0	0	0	0	0	0	0	0	0	0	0	0	0	0	0	0	0
349	90813.5	123.33	94.26	152.39	14.83	0	0	0	0	0	0	0	0	0	0	0	0	0	0	0	0	0	0	0	0	0	0	0	0	0	0	0	0	0	0	0	0	0	0	0	0	0	0	0
350	91073.7	123.33	94.25	152.41	14.84	0	0	0	0	0	0	0	0	0	0	0	0	0	0	0	0	0	0	0	0	0	0	0	0	0	0	0	0	0	0	0	0	0	0	0	0	0	0	0
351	91333.9	123.33	94.24	152.42	14.84	0	0	0	0	0	0	0	0	0	0	0	0	0	0	0	0	0	0	0	0	0	0	0	0	0	0	0	0	0	0	0	0	0	0	0	0	0	0	0
352	91594.1	123.34	94.24	152.44	14.85	0	0	0	0	0	0	0	0	0	0	0	0	0	0	0	0	0	0	0	0	0	0	0	0	0	0	0	0	0	0	0	0	0	0	0	0	0	0	0
353	91854.3	123.34	94.23	152.46	14.85	0	0	0	0	0	0	0	0	0	0	0	0	0	0	0	0	0	0	0	0	0	0	0	0	0	0	0	0	0	0	0	0	0	0	0	0	0	0	0
354	92114.5	123.35	94.22	152.47	14.86	0	0	0	0	0	0	0	0	0	0	0	0	0	0	0	0	0	0	0	0	0	0	0	0	0	0	0	0	0	0	0	0	0	0	0	0	0	0	0
355	92374.7	123.35	94.21	152.49	14.87	0	0	0	0	0	0	0	0	0	0	0	0	0	0	0	0	0	0	0	0	0	0	0	0	0	0	0	0	0	0	0	0	0	0	0	0	0	0	0
356	92634.9	123.35	94.21	152.5	14.87	0	0	0	0	0	0	0	0	0	0	0	0	0	0	0	0	0	0	0	0	0	0	0	0	0	0	0	0	0	0	0	0	0	0	0	0	0	0	0
357	92895.2	123.36	94.2	152.52	14.88	0	0	0	0	0	0	0	0	0	0	0	0	0	0	0	0	0	0	0	0	0	0	0	0	0	0	0	0	0	0	0	0	0	0	0	0	0	0	0
358	93155.4	123.36	94.19	152.53	14.88	0	0	0	0	0	0	0	0	0	0	0	0	0	0	0	0	0	0	0	0	0	0	0	0	0	0	0	0	0	0	0	0	0	0	0	0	0	0	0
359	93415.6	123.36	94.18	152.54	14.89	0	0	0	0	0	0	0	0	0	0	0	0	0	0	0	0	0	0	0	0	0	0	0	0	0	0	0	0	0	0	0	0	0	0	0	0	0	0	0
360	93675.8	123.37	94.18	152.56	14.89	0	0	0	0	0	0	0	0	0	0	0	0	0	0	0	0	0	0	0	0	0	0	0	0	0	0	0	0	0	0	0	0	0	0	0	0	0	0	0
361	93936	123.37	94.17	152.57	14.9	0	0	0	0	0	0	0	0	0	0	0	0	0	0	0	0	0	0	0	0	0	0	0	0	0	0	0	0	0	0	0	0	0	0	0	0	0	0	0
362	94196.2	123.37	94.16	152.59	14.9	0	0	0	0	0	0	0	0	0	0	0	0	0	0	0	0	0	0	0	0	0	0	0	0	0	0	0	0	0	0	0	0	0	0	0	0	0	0	0
363	94456.4	123.38	94.16	152.6	14.91	0	0	0	0	0	0	0	0	0	0	0	0	0	0	0	0	0	0	0	0	0	0	0	0	0	0	0	0	0	0	0	0	0	0	0	0	0	0	0
364	94716.6	123.38	94.15	152.61	14.91	0	0	0	0	0	0	0	0	0	0	0	0	0	0	0	0	0	0	0	0	0	0	0	0	0	0	0	0	0	0	0	0	0	0	0	0	0	0	0
365	94976.8	123.38	94.14	152.63	14.92	0	0	0	0	0	0	0	0	0	0	0	0	0	0	0	0	0	0	0	0	0	0	0	0	0	0	0	0	0	0	0	0	0	0	0	0	0	0	0
366	95237.1	123.39	94.14	152.64	14.92	0	0	0	0	0	0	0	0	0	0	0	0	0	0	0	0	0	0	0	0	0	0	0	0	0	0	0	0	0	0	0	0	0	0	0	0	0	0	0
367	95497.3	123.39	94.13	152.65	14.93	0	0	0	0	0	0	0	0	0	0	0	0	0	0	0	0	0	0	0	0	0	0	0	0	0	0	0	0	0	0	0	0	0	0	0	0	0	0	0
368	95757.5	123.39	94.12	152.66	14.93	0	0	0	0	0	0	0	0	0	0	0	0	0	0	0	0	0	0	0	0	0	0	0	0	0	0	0	0	0	0	0	0	0	0	0	0	0	0	0
369	96017.7	123.4	94.12	152.68	14.94	0	0	0	0	0	0	0	0	0	0	0	0	0	0	0	0	0	0	0	0	0	0	0	0	0	0	0	0	0	0	0	0	0	0	0	0	0	0	0
370	96277.9	123.4	94.11	152.69	14.94	0	0	0	0	0	0	0	0	0	0	0	0	0	0	0	0	0	0	0	0	0	0	0	0	0	0	0	0	0	0	0	0	0	0	0	0	0	0	0
371	96538.1	123.4	94.11	152.7	14.95	0	0	0	0	0	0	0	0	0	0	0	0	0	0	0	0	0	0	0	0	0	0	0	0	0	0	0	0	0	0	0	0	0	0	0	0	0	0	0
372	96798.3	123.41	94.1	152.71	14.95	0	0	0	0	0	0	0	0	0	0	0	0	0	0	0	0	0	0	0	0	0	0	0	0	0	0	0	0	0	0	0	0	0	0	0	0	0	0	0
373	97058.5	123.41	94.09	152.72	14.96	0	0	0	0	0	0	0	0	0	0	0	0	0	0	0	0	0	0	0	0	0	0	0	0	0	0	0	0	0	0	0	0	0	0	0	0	0	0	0
374	97318.7	123.41	94.09	152.73	14.96	0	0	0	0	0	0	0	0	0	0	0	0	0	0	0	0	0	0	0	0	0	0	0	0	0	0	0	0	0	0	0	0	0	0	0	0	0	0	0
375	97578.9	123.41	94.08	152.75	14.97	0	0	0	0	0	0	0	0	0	0	0	0	0	0	0	0	0	0	0	0	0	0	0	0	0	0	0	0	0	0	0	0	0	0	0	0	0	0	0
376	97839.2	123.42	94.08	152.76	14.97	0	0	0	0	0	0	0	0	0	0	0	0	0	0	0	0	0	0	0	0	0	0	0	0	0	0	0	0	0	0	0	0	0	0	0	0	0	0	0
377	98099.4	123.42	94.07	152.77	14.97	0	0	0	0	0	0	0	0	0	0	0	0	0	0	0	0	0	0	0	0	0	0	0	0	0	0	0	0	0	0	0	0	0	0	0	0	0	0	0
378	98359.6	123.42	94.07	152.78	14.98	0	0	0	0	0	0	0	0	0	0	0	0	0	0	0	0	0	0	0	0	0	0	0	0	0	0	0	0	0	0	0	0	0	0	0	0	0	0	0
379	98619.8	123.42	94.06	152.79	14.98	0	0	0	0	0	0	0	0	0	0	0	0	0	0	0	0	0	0	0	0	0	0	0	0	0	0	0	0	0	0	0	0	0	0	0	0	0	0	0
380	98880	123.43	94.05	152.8	14.99	0	0	0	0	0	0	0	0	0	0	0	0	0	0	0	0	0	0	0	0	0	0	0	0	0	0	0	0	0	0	0	0	0	0	0	0	0	0	0
381	99140.2	123.43	94.05	152.81	14.99	0	0	0	0	0	0	0	0	0	0	0	0	0	0	0	0	0	0	0	0	0	0	0	0	0	0	0	0	0	0	0	0	0	0	0	0	0	0	0
382	99400.4	123.43	94.04	152.82	14.99	0	0	0	0	0	0	0	0	0	0	0	0	0	0	0	0	0	0	0	0	0	0	0	0	0	0	0	0	0	0	0	0	0	0	0	0	0	0	0
383	99660.6	123.43	94.04	152.83	15	0	0	0	0	0	0	0	0	0	0	0	0	0	0	0	0	0	0	0	0	0	0	0	0	0	0	0	0	0	0	0	0	0	0	0	0	0	0	0
384	99920.8	123.44	94.03	152.84	15	0	0	0	0	0	0	0	0	0	0	0	0	0	0	0	0	0	0	0	0	0	0	0	0	0	0	0	0	0	0	0	0	0	0	0	0	0	0	0
385	100181	123.44	94.03	152.85	15.01	0	0	0	0	0	0	0	0	0	0	0	0	0	0	0	0	0	0	0	0	0	0	0	0	0	0	0	0	0	0	0	0	0	0	0	0	0	0	0
386	100441	123.44	94.02	152.86	15.01	0	0	0	0	0	0	0	0	0	0	0	0	0	0	0	0	0	0	0	0	0	0	0	0	0	0	0	0	0	0	0	0	0	0	0	0	0	0	0
387	100701	123.44	94.02	152.87	15.01	0	0	0	0	0	0	0	0	0	0	0	0	0	0	0	0	0	0	0	0	0	0	0	0	0	0	0	0	0	0	0	0	0	0	0	0	0	0	0
388	100962	123.45	94.01	152.88	15.02	0	0	0	0	0	0	0	0	0	0	0	0	0	0	0	0	0	0	0	0	0	0	0	0	0	0	0	0	0	0	0	0	0	0	0	0	0	0	0
389	101222	123.45	94.01	152.89	15.02	0	0	0	0	0	0	0	0	0	0	0	0	0	0	0	0	0	0	0	0	0	0	0	0	0	0	0	0	0	0	0	0	0	0	0	0	0	0	0
390	101482	123.45	94	152.9	15.02	0	0	0	0	0	0	0	0	0	0	0	0	0	0	0	0	0	0	0	0	0	0	0	0	0	0	0	0	0	0	0	0	0	0	0	0	0	0	0
391	101742	123.45	94	152.91	15.03	0	0	0	0	0	0	0	0	0	0	0	0	0	0	0	0	0	0	0	0	0	0	0	0	0	0	0	0	0	0	0	0	0	0	0	0	0	0	0
392	102003	123.45	93.99	152.92	15.03	0	0	0	0	0	0	0	0	0	0	0	0	0	0	0	0	0	0	0	0	0	0	0	0	0	0	0	0	0	0	0	0	0	0	0	0	0	0	0
393	102263	123.46	93.99	152.92	15.03	0	0	0	0	0	0	0	0	0	0	0	0	0	0	0	0	0	0	0	0	0	0	0	0	0	0	0	0	0	0	0	0	0	0	0	0	0	0	0
394	102523	123.46	93.98	152.93	15.04	0	0	0	0	0	0	0	0	0	0	0	0	0	0	0	0	0	0	0	0	0	0	0	0	0	0	0	0	0	0	0	0	0	0	0	0	0	0	0
395	102783	123.46	93.98	152.94	15.04	0	0	0	0	0	0	0	0	0	0	0	0	0	0	0	0	0	0	0	0	0	0	0	0	0	0	0	0	0	0	0	0	0	0	0	0	0	0	0
396	103043	123.46	93.98	152.95	15.04	0	0	0	0	0	0	0	0	0	0	0	0	0	0	0	0	0	0	0	0	0	0	0	0	0	0	0	0	0	0	0	0	0	0	0	0	0	0	0
397	103304	123.46	93.97	152.96	15.05	0	0	0	0	0	0	0	0	0	0	0	0	0	0	0	0	0	0	0	0	0	0	0	0	0	0	0	0	0	0	0	0	0	0	0	0	0	0	0
398	103564	123.47	93.97	152.97	15.05	0	0	0	0	0	0	0	0	0	0	0	0	0	0	0	0	0	0	0	0	0	0	0	0	0	0	0	0	0	0	0	0	0	0	0	0	0	0	0
399	103824	123.47	93.96	152.97	15.05	0	0	0	0	0	0	0	0	0	0	0	0	0	0	0	0	0	0	0	0	0	0	0	0	0	0	0	0	0	0	0	0	0	0	0	0	0	0	0
400	104084	123.47	93.96	152.98	15.06	0	0	0	0	0	0	0	0	0	0	0	0	0	0	0	0	0	0	0	0	0	0	0	0	0	0	0	0	0	0	0	0	0	0	0	0	0	0	0
401	104344	123.47	93.95	152.99	15.06	0	0	0	0	0	0	0	0	0	0	0	0	0	0	0	0	0	0	0	0	0	0	0	0	0	0	0	0	0	0	0	0	0	0	0	0	0	0	0
402	104605	123.47	93.95	153	15.06	0	0	0	0	0	0	0	0	0	0	0	0	0	0	0	0	0	0	0	0	0	0	0	0	0	0	0	0	0	0	0	0	0	0	0	0	0	0	0
403	104865	123.48	93.95	153	15.07	0	0	0	0	0	0	0	0	0	0	0	0	0	0	0	0	0	0	0	0	0	0	0	0	0	0	0	0	0	0	0	0	0	0	0	0	0	0	0
404	105125	123.48	93.94	153.01	15.07	0	0	0	0	0	0	0	0	0	0	0	0	0	0	0	0	0	0	0	0	0	0	0	0	0	0	0	0	0	0	0	0	0	0	0	0	0	0	0
405	105385	123.48	93.94	153.02	15.07	0	0	0	0	0	0	0	0	0	0	0	0	0	0	0	0	0	0	0	0	0	0	0	0	0	0	0	0	0	0	0	0	0	0	0	0	0	0	0
406	105645	123.48	93.93	153.03	15.07	0	0	0	0	0	0	0	0	0	0	0	0	0	0	0	0	0	0	0	0	0	0	0	0	0	0	0	0	0	0	0	0	0	0	0	0	0	0	0
407	105906	123.48	93.93	153.03	15.08	0	0	0	0	0	0	0	0	0	0	0	0	0	0	0	0	0	0	0	0	0	0	0	0	0	0	0	0	0	0	0	0	0	0	0	0	0	0	0
408	106166	123.48	93.93	153.04	15.08	0	0	0	0	0	0	0	0	0	0	0	0	0	0	0	0	0	0	0	0	0	0	0	0	0	0	0	0	0	0	0	0	0	0	0	0	0	0	0
409	106426	123.49	93.92	153.05	15.08	0	0	0	0	0	0	0	0	0	0	0	0	0	0	0	0	0	0	0	0	0	0	0	0	0	0	0	0	0	0	0	0	0	0	0	0	0	0	0
410	106686	123.49	93.92	153.05	15.09	0	0	0	0	0	0	0	0	0	0	0	0	0	0	0	0	0	0	0	0	0	0	0	0	0	0	0	0	0	0	0	0	0	0	0	0	0	0	0
411	106947	123.49	93.91	153.06	15.09	0	0	0	0	0	0	0	0	0	0	0	0	0	0	0	0	0	0	0	0	0	0	0	0	0	0	0	0	0	0	0	0	0	0	0	0	0	0	0
412	107207	123.49	93.91	153.07	15.09	0	0	0	0	0	0	0	0	0	0	0	0	0	0	0	0	0	0	0	0	0	0	0	0	0	0	0	0	0	0	0	0	0	0	0	0	0	0	0
413	107467	123.49	93.91	153.07	15.09	0	0	0	0	0	0	0	0	0	0	0	0	0	0	0	0	0	0	0	0	0	0	0	0	0	0	0	0	0	0	0	0	0	0	0	0	0	0	0
414	107727	123.49	93.9	153.08	15.1	0	0	0	0	0	0	0	0	0	0	0	0	0	0	0	0	0	0	0	0	0	0	0	0	0	0	0	0	0	0	0	0	0	0	0	0	0	0	0
415	107987	123.49	93.9	153.09	15.1	0	0	0	0	0	0	0	0	0	0	0	0	0	0	0	0	0	0	0	0	0	0	0	0	0	0	0	0	0	0	0	0	0	0	0	0	0	0	0
416	108248	123.5	93.9	153.09	15.1	0	0	0	0	0	0	0	0	0	0	0	0	0	0	0	0	0	0	0	0	0	0	0	0	0	0	0	0	0	0	0	0	0	0	0	0	0	0	0
417	108508	123.5	93.89	153.1	15.1	0	0	0	0	0	0	0	0	0	0	0	0	0	0	0	0	0	0	0	0	0	0	0	0	0	0	0	0	0	0	0	0	0	0	0	0	0	0	0
418	108768	123.5	93.89	153.11	15.11	0	0	0	0	0	0	0	0	0	0	0	0	0	0	0	0	0	0	0	0	0	0	0	0	0	0	0	0	0	0	0	0	0	0	0	0	0	0	0
419	109028	123.5	93.89	153.11	15.11	0	0	0	0	0	0	0	0	0	0	0	0	0	0	0	0	0	0	0	0	0	0	0	0	0	0	0	0	0	0	0	0	0	0	0	0	0	0	0
420	109288	123.5	93.88	153.12	15.11	0	0	0	0	0	0	0	0	0	0	0	0	0	0	0	0	0	0	0	0	0	0	0	0	0	0	0	0	0	0	0	0	0	0	0	0	0	0	0
421	109549	123.5	93.88	153.12	15.11	0	0	0	0	0	0	0	0	0	0	0	0	0	0	0	0	0	0	0	0	0	0	0	0	0	0	0	0	0	0	0	0	0	0	0	0	0	0	0
422	109809	123.5	93.88	153.13	15.12	0	0	0	0	0	0	0	0	0	0	0	0	0	0	0	0	0	0	0	0	0	0	0	0	0	0	0	0	0	0	0	0	0	0	0	0	0	0	0
423	110069	123.5	93.87	153.14	15.12	0	0	0	0	0	0	0	0	0	0	0	0	0	0	0	0	0	0	0	0	0	0	0	0	0	0	0	0	0	0	0	0	0	0	0	0	0	0	0
424	110329	123.51	93.87	153.14	15.12	0	0	0	0	0	0	0	0	0	0	0	0	0	0	0	0	0	0	0	0	0	0	0	0	0	0	0	0	0	0	0	0	0	0	0	0	0	0	0
425	110589	123.51	93.87	153.15	15.12	0	0	0	0	0	0	0	0	0	0	0	0	0	0	0	0	0	0	0	0	0	0	0	0	0	0	0	0	0	0	0	0	0	0	0	0	0	0	0
426	110850	123.51	93.86	153.15	15.12	0	0	0	0	0	0	0	0	0	0	0	0	0	0	0	0	0	0	0	0	0	0	0	0	0	0	0	0	0	0	0	0	0	0	0	0	0	0	0
427	111110	123.51	93.86	153.16	15.13	0	0	0	0	0	0	0	0	0	0	0	0	0	0	0	0	0	0	0	0	0	0	0	0	0	0	0	0	0	0	0	0	0	0	0	0	0	0	0
428	111370	123.51	93.86	153.16	15.13	0	0	0	0	0	0	0	0	0	0	0	0	0	0	0	0	0	0	0	0	0	0	0	0	0	0	0	0	0	0	0	0	0	0	0	0	0	0	0
429	111630	123.51	93.86	153.17	15.13	0	0	0	0	0	0	0	0	0	0	0	0	0	0	0	0	0	0	0	0	0	0	0	0	0	0	0	0	0	0	0	0	0	0	0	0	0	0	0
430	111891	123.51	93.85	153.17	15.13	0	0	0	0	0	0	0	0	0	0	0	0	0	0	0	0	0	0	0	0	0	0	0	0	0	0	0	0	0	0	0	0	0	0	0	0	0	0	0
431	112151	123.51	93.85	153.18	15.13	0	0	0	0	0	0	0	0	0	0	0	0	0	0	0	0	0	0	0	0	0	0	0	0	0	0	0	0	0	0	0	0	0	0	0	0	0	0	0
432	112411	123.51	93.85	153.18	15.14	0	0	0	0	0	0	0	0	0	0	0	0	0	0	0	0	0	0	0	0	0	0	0	0	0	0	0	0	0	0	0	0	0	0	0	0	0	0	0
433	112671	123.52	93.84	153.19	15.14	0	0	0	0	0	0	0	0	0	0	0	0	0	0	0	0	0	0	0	0	0	0	0	0	0	0	0	0	0	0	0	0	0	0	0	0	0	0	0
434	112931	123.52	93.84	153.19	15.14	0	0	0	0	0	0	0	0	0	0	0	0	0	0	0	0	0	0	0	0	0	0	0	0	0	0	0	0	0	0	0	0	0	0	0	0	0	0	0
435	113192	123.52	93.84	153.2	15.14	0	0	0	0	0	0	0	0	0	0	0	0	0	0	0	0	0	0	0	0	0	0	0	0	0	0	0	0	0	0	0	0	0	0	0	0	0	0	0
436	113452	123.52	93.84	153.2	15.14	0	0	0	0	0	0	0	0	0	0	0	0	0	0	0	0	0	0	0	0	0	0	0	0	0	0	0	0	0	0	0	0	0	0	0	0	0	0	0
437	113712	123.52	93.83	153.21	15.15	0	0	0	0	0	0	0	0	0	0	0	0	0	0	0	0	0	0	0	0	0	0	0	0	0	0	0	0	0	0	0	0	0	0	0	0	0	0	0
438	113972	123.52	93.83	153.21	15.15	0	0	0	0	0	0	0	0	0	0	0	0	0	0	0	0	0	0	0	0	0	0	0	0	0	0	0	0	0	0	0	0	0	0	0	0	0	0	0
439	114232	123.52	93.83	153.22	15.15	0	0	0	0	0	0	0	0	0	0	0	0	0	0	0	0	0	0	0	0	0	0	0	0	0	0	0	0	0	0	0	0	0	0	0	0	0	0	0
440	114493	123.52	93.83	153.22	15.15	0	0	0	0	0	0	0	0	0	0	0	0	0	0	0	0	0	0	0	0	0	0	0	0	0	0	0	0	0	0	0	0	0	0	0	0	0	0	0
441	114753	123.52	93.82	153.22	15.15	0	0	0	0	0	0	0	0	0	0	0	0	0	0	0	0	0	0	0	0	0	0	0	0	0	0	0	0	0	0	0	0	0	0	0	0	0	0	0
442	115013	123.52	93.82	153.23	15.16	0	0	0	0	0	0	0	0	0	0	0	0	0	0	0	0	0	0	0	0	0	0	0	0	0	0	0	0	0	0	0	0	0	0	0	0	0	0	0
443	115273	123.53	93.82	153.23	15.16	0	0	0	0	0	0	0	0	0	0	0	0	0	0	0	0	0	0	0	0	0	0	0	0	0	0	0	0	0	0	0	0	0	0	0	0	0	0	0
444	115533	123.53	93.82	153.24	15.16	0	0	0	0	0	0	0	0	0	0	0	0	0	0	0	0	0	0	0	0	0	0	0	0	0	0	0	0	0	0	0	0	0	0	0	0	0	0	0
445	115794	123.53	93.81	153.24	15.16	0	0	0	0	0	0	0	0	0	0	0	0	0	0	0	0	0	0	0	0	0	0	0	0	0	0	0	0	0	0	0	0	0	0	0	0	0	0	0
446	116054	123.53	93.81	153.25	15.16	0	0	0	0	0	0	0	0	0	0	0	0	0	0	0	0	0	0	0	0	0	0	0	0	0	0	0	0	0	0	0	0	0	0	0	0	0	0	0
447	116314	123.53	93.81	153.25	15.16	0	0	0	0	0	0	0	0	0	0	0	0	0	0	0	0	0	0	0	0	0	0	0	0	0	0	0	0	0	0	0	0	0	0	0	0	0	0	0
448	116574	123.53	93.81	153.25	15.16	0	0	0	0	0	0	0	0	0	0	0	0	0	0	0	0	0	0	0	0	0	0	0	0	0	0	0	0	0	0	0	0	0	0	0	0	0	0	0
449	116835	123.53	93.8	153.26	15.17	0	0	0	0	0	0	0	0	0	0	0	0	0	0	0	0	0	0	0	0	0	0	0	0	0	0	0	0	0	0	0	0	0	0	0	0	0	0	0
450	117095	123.53	93.8	153.26	15.17	0	0	0	0	0	0	0	0	0	0	0	0	0	0	0	0	0	0	0	0	0	0	0	0	0	0	0	0	0	0	0	0	0	0	0	0	0	0	0
451	117355	123.53	93.8	153.26	15.17	0	0	0	0	0	0	0	0	0	0	0	0	0	0	0	0	0	0	0	0	0	0	0	0	0	0	0	0	0	0	0	0	0	0	0	0	0	0	0
452	117615	123.53	93.8	153.27	15.17	0	0	0	0	0	0	0	0	0	0	0	0	0	0	0	0	0	0	0	0	0	0	0	0	0	0	0	0	0	0	0	0	0	0	0	0	0	0	0
453	117875	123.53	93.8	153.27	15.17	0	0	0	0	0	0	0	0	0	0	0	0	0	0	0	0	0	0	0	0	0	0	0	0	0	0	0	0	0	0	0	0	0	0	0	0	0	0	0
454	118136	123.53	93.79	153.28	15.17	0	0	0	0	0	0	0	0	0	0	0	0	0	0	0	0	0	0	0	0	0	0	0	0	0	0	0	0	0	0	0	0	0	0	0	0	0	0	0
455	118396	123.54	93.79	153.28	15.18	0	0	0	0	0	0	0	0	0	0	0	0	0	0	0	0	0	0	0	0	0	0	0	0	0	0	0	0	0	0	0	0	0	0	0	0	0	0	0
456	118656	123.54	93.79	153.28	15.18	0	0	0	0	0	0	0	0	0	0	0	0	0	0	0	0	0	0	0	0	0	0	0	0	0	0	0	0	0	0	0	0	0	0	0	0	0	0	0
457	118916	123.54	93.79	153.29	15.18	0	0	0	0	0	0	0	0	0	0	0	0	0	0	0	0	0	0	0	0	0	0	0	0	0	0	0	0	0	0	0	0	0	0	0	0	0	0	0
458	119176	123.54	93.79	153.29	15.18	0	0	0	0	0	0	0	0	0	0	0	0	0	0	0	0	0	0	0	0	0	0	0	0	0	0	0	0	0	0	0	0	0	0	0	0	0	0	0
459	119437	123.54	93.78	153.29	15.18	0	0	0	0	0	0	0	0	0	0	0	0	0	0	0	0	0	0	0	0	0	0	0	0	0	0	0	0	0	0	0	0	0	0	0	0	0	0	0
460	119697	123.54	93.78	153.3	15.18	0	0	0	0	0	0	0	0	0	0	0	0	0	0	0	0	0	0	0	0	0	0	0	0	0	0	0	0	0	0	0	0	0	0	0	0	0	0	0
461	119957	123.54	93.78	153.3	15.18	0	0	0	0	0	0	0	0	0	0	0	0	0	0	0	0	0	0	0	0	0	0	0	0	0	0	0	0	0	0	0	0	0	0	0	0	0	0	0
462	120217	123.54	93.78	153.3	15.18	0	0	0	0	0	0	0	0	0	0	0	0	0	0	0	0	0	0	0	0	0	0	0	0	0	0	0	0	0	0	0	0	0	0	0	0	0	0	0
463	120477	123.54	93.78	153.31	15.19	0	0	0	0	0	0	0	0	0	0	0	0	0	0	0	0	0	0	0	0	0	0	0	0	0	0	0	0	0	0	0	0	0	0	0	0	0	0	0
464	120738	123.54	93.77	153.31	15.19	0	0	0	0	0	0	0	0	0	0	0	0	0	0	0	0	0	0	0	0	0	0	0	0	0	0	0	0	0	0	0	0	0	0	0	0	0	0	0
465	120998	123.54	93.77	153.31	15.19	0	0	0	0	0	0	0	0	0	0	0	0	0	0	0	0	0	0	0	0	0	0	0	0	0	0	0	0	0	0	0	0	0	0	0	0	0	0	0
466	121258	123.54	93.77	153.31	15.19	0	0	0	0	0	0	0	0	0	0	0	0	0	0	0	0	0	0	0	0	0	0	0	0	0	0	0	0	0	0	0	0	0	0	0	0	0	0	0
467	121518	123.54	93.77	153.32	15.19	0	0	0	0	0	0	0	0	0	0	0	0	0	0	0	0	0	0	0	0	0	0	0	0	0	0	0	0	0	0	0	0	0	0	0	0	0	0	0
468	121779	123.54	93.77	153.32	15.19	0	0	0	0	0	0	0	0	0	0	0	0	0	0	0	0	0	0	0	0	0	0	0	0	0	0	0	0	0	0	0	0	0	0	0	0	0	0	0
469	122039	123.54	93.76	153.32	15.19	0	0	0	0	0	0	0	0	0	0	0	0	0	0	0	0	0	0	0	0	0	0	0	0	0	0	0	0	0	0	0	0	0	0	0	0	0	0	0
470	122299	123.54	93.76	153.33	15.19	0	0	0	0	0	0	0	0	0	0	0	0	0	0	0	0	0	0	0	0	0	0	0	0	0	0	0	0	0	0	0	0	0	0	0	0	0	0	0
471	122559	123.55	93.76	153.33	15.2	0	0	0	0	0	0	0	0	0	0	0	0	0	0	0	0	0	0	0	0	0	0	0	0	0	0	0	0	0	0	0	0	0	0	0	0	0	0	0
472	122819	123.55	93.76	153.33	15.2	0	0	0	0	0	0	0	0	0	0	0	0	0	0	0	0	0	0	0	0	0	0	0	0	0	0	0	0	0	0	0	0	0	0	0	0	0	0	0
473	123080	123.55	93.76	153.33	15.2	0	0	0	0	0	0	0	0	0	0	0	0	0	0	0	0	0	0	0	0	0	0	0	0	0	0	0	0	0	0	0	0	0	0	0	0	0	0	0
474	123340	123.55	93.76	153.34	15.2	0	0	0	0	0	0	0	0	0	0	0	0	0	0	0	0	0	0	0	0	0	0	0	0	0	0	0	0	0	0	0	0	0	0	0	0	0	0	0
475	123600	123.55	93.75	153.34	15.2	0	0	0	0	0	0	0	0	0	0	0	0	0	0	0	0	0	0	0	0	0	0	0	0	0	0	0	0	0	0	0	0	0	0	0	0	0	0	0
476	123860	123.55	93.75	153.34	15.2	0	0	0	0	0	0	0	0	0	0	0	0	0	0	0	0	0	0	0	0	0	0	0	0	0	0	0	0	0	0	0	0	0	0	0	0	0	0	0
477	124120	123.55	93.75	153.35	15.2	0	0	0	0	0	0	0	0	0	0	0	0	0	0	0	0	0	0	0	0	0	0	0	0	0	0	0	0	0	0	0	0	0	0	0	0	0	0	0
478	124381	123.55	93.75	153.35	15.2	0	0	0	0	0	0	0	0	0	0	0	0	0	0	0	0	0	0	0	0	0	0	0	0	0	0	0	0	0	0	0	0	0	0	0	0	0	0	0
479	124641	123.55	93.75	153.35	15.2	0	0	0	0	0	0	0	0	0	0	0	0	0	0	0	0	0	0	0	0	0	0	0	0	0	0	0	0	0	0	0	0	0	0	0	0	0	0	0
480	124901	123.55	93.75	153.35	15.21	0	0	0	0	0	0	0	0	0	0	0	0	0	0	0	0	0	0	0	0	0	0	0	0	0	0	0	0	0	0	0	0	0	0	0	0	0	0	0
481	125161	123.55	93.75	153.35	15.21	0	0	0	0	0	0	0	0	0	0	0	0	0	0	0	0	0	0	0	0	0	0	0	0	0	0	0	0	0	0	0	0	0	0	0	0	0	0	0
482	125421	123.55	93.74	153.36	15.21	0	0	0	0	0	0	0	0	0	0	0	0	0	0	0	0	0	0	0	0	0	0	0	0	0	0	0	0	0	0	0	0	0	0	0	0	0	0	0
483	125682	123.55	93.74	153.36	15.21	0	0	0	0	0	0	0	0	0	0	0	0	0	0	0	0	0	0	0	0	0	0	0	0	0	0	0	0	0	0	0	0	0	0	0	0	0	0	0
484	125942	123.55	93.74	153.36	15.21	0	0	0	0	0	0	0	0	0	0	0	0	0	0	0	0	0	0	0	0	0	0	0	0	0	0	0	0	0	0	0	0	0	0	0	0	0	0	0
485	126202	123.55	93.74	153.36	15.21	0	0	0	0	0	0	0	0	0	0	0	0	0	0	0	0	0	0	0	0	0	0	0	0	0	0	0	0	0	0	0	0	0	0	0	0	0	0	0
486	126462	123.55	93.74	153.37	15.21	0	0	0	0	0	0	0	0	0	0	0	0	0	0	0	0	0	0	0	0	0	0	0	0	0	0	0	0	0	0	0	0	0	0	0	0	0	0	0
487	126723	123.55	93.74	153.37	15.21	0	0	0	0	0	0	0	0	0	0	0	0	0	0	0	0	0	0	0	0	0	0	0	0	0	0	0	0	0	0	0	0	0	0	0	0	0	0	0
488	126983	123.55	93.74	153.37	15.21	0	0	0	0	0	0	0	0	0	0	0	0	0	0	0	0	0	0	0	0	0	0	0	0	0	0	0	0	0	0	0	0	0	0	0	0	0	0	0
489	127243	123.55	93.73	153.37	15.21	0	0	0	0	0	0	0	0	0	0	0	0	0	0	0	0	0	0	0	0	0	0	0	0	0	0	0	0	0	0	0	0	0	0	0	0	0	0	0
490	127503	123.55	93.73	153.38	15.21	0	0	0	0	0	0	0	0	0	0	0	0	0	0	0	0	0	0	0	0	0	0	0	0	0	0	0	0	0	0	0	0	0	0	0	0	0	0	0
491	127763	123.55	93.73	153.38	15.22	0	0	0	0	0	0	0	0	0	0	0	0	0	0	0	0	0	0	0	0	0	0	0	0	0	0	0	0	0	0	0	0	0	0	0	0	0	0	0
492	128024	123.56	93.73	153.38	15.22	0	0	0	0	0	0	0	0	0	0	0	0	0	0	0	0	0	0	0	0	0	0	0	0	0	0	0	0	0	0	0	0	0	0	0	0	0	0	0
493	128284	123.56	93.73	153.38	15.22	0	0	0	0	0	0	0	0	0	0	0	0	0	0	0	0	0	0	0	0	0	0	0	0	0	0	0	0	0	0	0	0	0	0	0	0	0	0	0
494	128544	123.56	93.73	153.38	15.22	0	0	0	0	0	0	0	0	0	0	0	0	0	0	0	0	0	0	0	0	0	0	0	0	0	0	0	0	0	0	0	0	0	0	0	0	0	0	0
495	128804	123.56	93.73	153.39	15.22	0	0	0	0	0	0	0	0	0	0	0	0	0	0	0	0	0	0	0	0	0	0	0	0	0	0	0	0	0	0	0	0	0	0	0	0	0	0	0
496	129064	123.56	93.73	153.39	15.22	0	0	0	0	0	0	0	0	0	0	0	0	0	0	0	0	0	0	0	0	0	0	0	0	0	0	0	0	0	0	0	0	0	0	0	0	0	0	0
497	129325	123.56	93.72	153.39	15.22	0	0	0	0	0	0	0	0	0	0	0	0	0	0	0	0	0	0	0	0	0	0	0	0	0	0	0	0	0	0	0	0	0	0	0	0	0	0	0
498	129585	123.56	93.72	153.39	15.22	0	0	0	0	0	0	0	0	0	0	0	0	0	0	0	0	0	0	0	0	0	0	0	0	0	0	0	0	0	0	0	0	0	0	0	0	0	0	0
499	129845	123.56	93.72	153.39	15.22	0	0	0	0	0	0	0	0	0	0	0	0	0	0	0	0	0	0	0	0	0	0	0	0	0	0	0	0	0	0	0	0	0	0	0	0	0	0	0
500	130105	123.56	93.72	153.39	15.22	0	0	0	0	0	0	0	0	0	0	0	0	0	0	0	0	0	0	0	0	0	0	0	0	0	0	0	0	0	0	0	0	0	0	0	0	0	0	0

## Sheet: Zooplankton mezo-eutrophy
EstimateS (Version 9.1.0), Copyright R. K. Colwell: http://purl.oclc.org/estimates
Diversity Output from Input File: DIMI (11, sierpieÄ 2017, )
Reference Sample = 69
Samples	Individuals (computed)	S(est)	S(est) 95% CI Lower Bound	S(est) 95% CI Upper Bound	S(est) SD	S Mean (runs)	Singletons Mean	Singletons SD (runs)	Doubletons Mean	Doubletons SD (runs)	Uniques Mean	Uniques SD (runs)	Duplicates Mean	Duplicates SD (runs)	ACE Mean	ACE SD (runs)	ICE Mean	ICE SD (runs)	Chao 1 Mean	Chao 1 95% CI Lower Bound	Chao 1 95% CI Upper Bound	Chao 1 SD (analytical)	Chao 2 Mean	Chao 2 95% CI Lower Bound	Chao 2 95% CI Upper Bound	Chao 2 SD (analytical)	Jack 1 Mean	Jack 1 SD (analytical)	Jack 2 Mean	Jack 2 SD (runs)	Bootstrap Mean	Bootstrap SD (runs)	MMRuns Mean	MMMeans (1 run)	Cole Rarefaction	Cole SD (analytical)	Alpha Mean	Alpha SD (analytical)	Shannon Mean	Shannon SD (runs)	Shannon Exponential Mean	Shannon Exponential SD (runs)	Simpson Inv Mean	Simpson Inv SD (runs)
1	547.26	19.61	14.57	24.65	2.57	19.24	5.99	4.13	2.09	1.55	19.24	4.88	0	0	32.76	24.2	19.24	4.88	28.88	21.78	59.54	7.98	19.24	30.44	30.44	0	19.24	0	0	0	19.24	4.88	0	0	37.66	2.49	7.61	3.7	1.93	0.42	7.49	3.05	5.16	2.61
2	1094.52	29.34	22.7	35.98	3.39	28.64	7.07	4.11	2.8	1.59	18.2	5.5	10.44	3.65	38.22	13.28	85.67	58.57	37.8	30.93	67.99	7.78	38.43	31.8	59.57	6.24	37.74	2.71	37.74	7.13	33.19	5.92	81.82	58.23	43.92	2.69	5.87	0.52	2.17	0.35	9.23	2.82	5.79	2.01
3	1641.78	35.45	28.12	42.77	3.74	35.01	7.66	3.85	3.16	1.63	17.38	5.1	11.14	3.25	44.08	11.18	59.92	18.45	43.42	37.04	72.2	7.34	44.37	38.03	64.65	5.98	46.6	3.91	50.53	8.96	40.57	5.85	91.72	59.26	48.08	2.83	6.51	0.48	2.26	0.36	10.19	3.24	6.22	2.43
4	2189.04	39.84	32.18	47.5	3.91	39.54	8.73	3.85	3.39	1.73	16.79	4.76	10.48	2.91	50.29	12.5	58.09	12.67	49.89	42.12	82.82	8.61	49.49	42.71	71.31	6.41	52.13	4.22	57.03	10.16	45.54	6.38	72.05	60.28	51.33	2.93	6.98	0.47	2.32	0.34	10.7	3.32	6.48	2.56
5	2736.3	43.29	35.47	51.11	3.99	42.51	9.18	4.26	3.42	2.01	16.17	4.98	8.87	2.71	54.04	13.19	58.23	12.89	54.12	45.6	89.07	9.26	54.1	46.19	79.79	7.52	55.45	4.54	61.16	11.87	48.58	7.18	87.76	61.29	54.05	3.01	7.29	0.46	2.38	0.31	11.29	3.22	6.71	2.56
6	3283.57	46.16	38.27	54.06	4.03	45.52	9.99	3.91	3.49	2.11	16.34	4.65	8.33	2.86	58.45	12.5	60.62	11.95	59.55	49.24	100.35	10.97	58.59	49.65	87.55	8.49	59.14	4.9	65.59	11.7	51.84	7.12	69.68	62.29	56.39	3.07	7.63	0.46	2.41	0.29	11.6	3.18	6.73	2.54
7	3830.83	48.65	40.73	56.57	4.04	48.07	10.65	3.7	3.75	2.19	17.03	4.55	7.76	2.49	61.97	12.12	63.77	11.9	62.56	51.92	104.16	11.25	63.12	52.9	95.65	9.62	62.67	5.19	70.21	12.05	54.74	7.32	68.41	63.28	58.48	3.12	7.92	0.46	2.44	0.28	11.96	3.19	6.89	2.6
8	4378.09	50.87	42.95	58.78	4.04	50.26	11.27	3.54	3.91	2.07	17.35	4.16	7.44	2.45	65.76	12.1	66.07	11.16	64.69	54.1	105.77	11.15	66.76	55.53	102.45	10.56	65.44	5.31	73.67	11.65	57.13	7.19	67.95	64.24	60.37	3.15	8.13	0.46	2.48	0.28	12.35	3.2	7.08	2.65
9	4925.35	52.88	44.99	60.77	4.03	52.69	11.91	3.66	4.16	2.25	18.09	4.25	7.2	2.53	69.47	12.69	69.5	11.41	68.62	57.03	112.34	12.01	71.83	58.9	112.29	12.05	68.77	5.55	77.94	12.09	59.88	7.31	68.3	65.19	62.1	3.18	8.38	0.45	2.5	0.28	12.64	3.27	7.16	2.69
10	5472.61	54.73	46.88	62.59	4.01	54.43	12.47	3.65	4.31	2.32	18.63	4.44	6.82	2.53	73.04	13.51	72.1	11.77	71.75	59.31	117.22	12.66	78.44	62.63	126.07	14.42	71.2	5.67	81.25	12.76	61.84	7.35	68.83	66.12	63.69	3.2	8.53	0.45	2.53	0.26	12.92	3.15	7.28	2.66
11	6019.87	56.46	48.64	64.28	3.99	56.01	12.74	3.41	4.58	2.44	18.82	4.21	7	2.52	75.07	12.88	73.79	11.03	73.79	61.07	119.68	12.85	78.25	63.35	124	13.75	73.12	5.78	83.36	12.2	63.56	6.91	69.32	67.02	65.17	3.21	8.68	0.45	2.55	0.25	13.24	3.13	7.41	2.66
12	6567.13	58.08	50.31	65.85	3.97	57.56	13.08	3.42	4.73	2.36	19.06	3.99	7.25	2.52	77.6	13.15	75.61	10.61	75.31	62.61	121.01	12.81	79.72	64.89	125.04	13.65	75.03	5.81	85.42	11.67	65.26	6.72	69.83	67.9	66.55	3.22	8.8	0.44	2.57	0.23	13.38	3.01	7.39	2.53
13	7114.39	59.61	51.88	67.33	3.94	59.16	13.6	3.54	4.85	2.34	19.59	4	7.25	2.67	80.47	14.35	78.14	10.64	78.5	64.81	126.65	13.63	83.09	67.14	131.38	14.6	77.24	5.94	88.2	11.62	67.09	6.5	70.46	68.76	67.85	3.22	8.96	0.44	2.59	0.23	13.64	2.98	7.51	2.52
14	7661.65	61.06	53.38	68.74	3.92	60.86	14.09	3.47	5.22	2.25	20.24	3.93	7.28	2.35	82.73	14.85	81.17	10.87	79.97	66.6	125.92	13.14	85.67	69.25	134.68	14.91	79.65	5.98	91.24	11.34	69.06	6.46	71.21	69.6	69.08	3.22	9.13	0.44	2.6	0.21	13.74	2.86	7.47	2.38
15	8208.91	62.44	54.81	70.07	3.89	62.51	14.53	3.54	5.57	2.28	20.76	3.96	7.49	2.71	84.97	15.11	84.04	10.73	81.91	68.47	127.11	13.04	89.18	71.6	141.21	15.89	81.89	6.08	93.85	11.48	70.95	6.19	72	70.42	70.24	3.22	9.31	0.44	2.6	0.21	13.78	2.9	7.44	2.4
16	8756.17	63.76	56.18	71.35	3.87	63.55	14.58	3.53	5.95	2.42	20.88	3.93	7.73	2.71	85.81	14.9	85.73	10.55	81.39	68.83	124.4	12.32	89.79	72.55	140.46	15.52	83.13	6.03	95.08	11.47	72.09	6.18	72.71	71.21	71.34	3.21	9.37	0.44	2.61	0.21	13.91	2.84	7.45	2.38
17	9303.43	65.02	57.49	72.56	3.85	64.76	14.81	3.69	6.3	2.47	21.18	4.08	7.88	2.81	87.23	15.83	88.03	11.32	81.72	69.85	122	11.59	91.28	73.93	141.99	15.58	84.69	6.01	96.86	11.8	73.45	6.24	73.4	71.99	72.39	3.2	9.47	0.44	2.62	0.2	13.98	2.8	7.45	2.33
18	9850.7	66.24	58.74	73.73	3.82	65.93	15.24	3.57	6.26	2.53	21.49	4.09	7.96	2.91	88.62	14.24	90.32	11.48	84.33	71.47	127.73	12.51	93.23	75.41	145.04	15.95	86.23	6.01	98.67	11.63	74.77	6.07	74.06	72.75	73.39	3.19	9.57	0.44	2.62	0.2	14.03	2.76	7.4	2.21
19	10398	67.41	59.96	74.86	3.8	67.27	15.6	3.27	6.51	2.53	22.06	3.95	7.96	3.06	90.04	12.3	93.2	11.22	85.06	72.66	126.5	12	96.85	77.57	152.67	17.22	88.17	6.11	101.18	11.35	76.33	6.04	74.74	73.49	74.34	3.18	9.7	0.44	2.62	0.19	14.03	2.6	7.3	2.05
20	10945.2	68.53	61.12	75.95	3.78	68.35	15.79	3.19	6.76	2.49	22.5	3.93	8.05	3	90.98	11.96	95.74	11.49	85.98	73.73	126.64	11.81	98.82	79.04	155.62	17.58	89.73	6.14	103.11	11.31	77.6	5.9	75.38	74.21	75.26	3.16	9.79	0.43	2.63	0.18	14.09	2.48	7.26	1.91
21	11492.5	69.62	62.25	76.99	3.76	69.4	16.01	3.4	7.07	2.46	22.68	3.87	8.39	2.89	92.37	12.41	97.68	11.37	86.99	74.85	126.69	11.61	98.71	79.79	152.41	16.71	91	6.21	104.31	11.11	78.77	5.67	76.01	74.92	76.14	3.14	9.88	0.43	2.62	0.18	14.01	2.38	7.13	1.79
22	12039.7	70.67	63.34	78.01	3.74	70.57	16.41	3.33	7.25	2.6	23.14	3.89	8.45	2.99	94.32	12.53	100.25	11.95	88.6	76.2	128.81	11.8	101.36	81.54	157.39	17.47	92.66	6.18	106.38	11.15	80.13	5.63	76.65	75.6	76.98	3.13	9.99	0.43	2.63	0.17	14.06	2.26	7.11	1.71
23	12587	71.69	64.39	78.99	3.72	71.43	16.63	3.25	7.35	2.62	23.28	3.63	8.62	2.97	95.32	12.4	101.71	11.29	89.71	77.16	130.23	11.92	101.76	82.25	156.72	17.16	93.7	6.16	107.44	10.46	81.08	5.53	77.27	76.28	77.8	3.1	10.06	0.43	2.63	0.16	14.05	2.23	7.08	1.69
24	13134.3	72.67	65.41	79.94	3.71	72.57	16.81	3.05	7.69	2.71	23.62	3.5	8.95	2.93	96.28	11.88	103.72	10.99	90.52	78.2	130.2	11.68	102.76	83.41	156.91	16.96	95.21	6.27	109.01	9.92	82.4	5.3	77.91	76.93	78.58	3.08	10.17	0.43	2.63	0.16	14.06	2.14	7.04	1.63
25	13681.5	73.63	66.39	80.86	3.69	73.58	17.02	2.98	7.92	2.74	23.92	3.37	9.03	2.79	97.71	11.83	105.71	10.7	91.35	79.2	130.09	11.45	103.83	84.53	157.46	16.85	96.54	6.31	110.59	9.54	83.55	5.04	78.53	77.57	79.34	3.06	10.26	0.43	2.63	0.16	14.06	2.14	7.01	1.65
26	14228.8	74.55	67.35	81.75	3.67	74.28	17.08	3.01	8.07	2.86	23.94	3.34	9.25	2.75	98.45	11.71	106.54	10.86	92.18	79.95	131.19	11.53	103.57	84.92	155.12	16.23	97.3	6.29	111.2	9.68	84.3	5.13	79.11	78.2	80.07	3.03	10.31	0.43	2.64	0.15	14.15	2.06	7.03	1.59
27	14776	75.45	68.27	82.62	3.66	75.31	17.12	2.89	8.43	2.86	24.24	3.17	9.54	2.82	98.8	10.78	108.36	10.49	92.41	80.74	129.49	10.98	104.59	86	155.75	16.14	98.65	6.33	112.6	9.16	85.48	4.86	79.7	78.81	80.78	3	10.42	0.43	2.64	0.14	14.2	2.03	7.02	1.58
28	15323.3	76.32	69.17	83.46	3.65	76.12	17.13	3.01	8.72	2.93	24.25	3.45	9.99	3.07	99.4	10.49	109.52	11.65	92.66	81.4	128.31	10.57	104.39	86.5	153.31	15.48	99.5	6.29	113.09	9.99	86.36	5.12	80.27	79.41	81.46	2.98	10.49	0.43	2.65	0.14	14.25	1.99	7.04	1.54
29	15870.6	77.16	70.04	84.28	3.63	77.04	17.29	2.98	8.91	2.84	24.47	3.67	10.33	3.13	100.5	10.43	111.08	12.46	93.56	82.34	128.85	10.5	105.3	87.49	153.71	15.36	100.67	6.32	114.17	10.61	87.41	5.12	80.84	80	82.12	2.95	10.59	0.43	2.65	0.14	14.3	1.95	7.04	1.51
30	16417.8	77.98	70.89	85.08	3.62	77.93	17.41	3.08	9.18	2.7	24.59	3.77	10.6	2.97	101.34	10.21	112.2	12.58	93.99	83.12	127.91	10.12	105.31	88.13	151.59	14.74	101.7	6.36	115.1	10.88	88.39	5.03	81.4	80.57	82.77	2.92	10.67	0.43	2.65	0.13	14.31	1.93	7.01	1.49
31	16965.1	78.78	71.71	85.85	3.61	78.56	17.51	2.91	9.26	2.6	24.6	3.6	10.79	2.84	101.9	9.71	112.85	11.96	94.49	83.72	128.07	10.03	105.03	88.44	149.61	14.21	102.37	6.37	115.62	10.25	89.06	4.86	81.93	81.13	83.39	2.88	10.71	0.43	2.65	0.13	14.27	1.88	6.95	1.45
32	17512.3	79.56	72.51	86.61	3.6	79.39	17.72	2.99	9.36	2.66	24.9	3.83	10.86	2.99	102.73	9.63	114.47	13.03	95.72	84.71	129.82	10.21	106.94	89.74	152.95	14.7	103.51	6.4	117	10.96	90.03	4.84	82.46	81.68	83.99	2.85	10.78	0.43	2.65	0.13	14.33	1.86	6.99	1.42
33	18059.6	80.32	73.29	87.35	3.59	80.19	17.74	2.95	9.49	2.82	24.83	3.7	11.13	2.94	103.33	9.63	114.75	12.18	96.52	85.51	130.64	10.22	106.73	90.16	151.01	14.15	104.27	6.39	117.46	10.59	90.85	4.7	82.98	82.21	84.58	2.82	10.85	0.43	2.66	0.12	14.38	1.75	6.98	1.36
34	18606.9	81.05	74.04	88.06	3.58	80.91	17.74	2.88	9.79	2.8	24.83	3.75	11.45	2.91	103.63	8.85	115.43	12.11	96.61	86.03	129.35	9.81	106.55	90.58	149.11	13.62	105.01	6.36	117.93	10.84	91.63	4.81	83.49	82.74	85.15	2.78	10.9	0.43	2.66	0.12	14.34	1.69	6.95	1.29
35	19154.1	81.77	74.78	88.76	3.57	81.56	17.67	2.91	10.1	2.73	24.84	3.8	11.73	2.92	103.65	8.76	116.04	12.25	96.53	86.44	127.71	9.34	106.69	91.05	148.3	13.33	105.69	6.39	118.38	11.02	92.33	4.81	83.98	83.25	85.7	2.74	10.96	0.43	2.66	0.11	14.37	1.63	6.95	1.25
36	19701.4	82.46	75.49	89.44	3.56	82.12	17.54	2.97	10.19	2.71	24.71	3.92	11.92	2.93	103.76	8.77	116.12	12.42	96.64	86.85	127	9.09	106.74	91.42	147.55	13.07	106.14	6.35	118.54	11.29	92.88	4.81	84.45	83.76	86.24	2.71	10.99	0.43	2.66	0.11	14.42	1.58	6.96	1.19
37	20248.7	83.14	76.18	90.1	3.55	83.04	17.58	2.88	10.58	2.62	24.88	3.88	12.31	3.01	104.51	8.7	117.43	12.2	96.89	87.55	125.79	8.66	107.12	92.17	146.74	12.71	107.25	6.37	119.46	11.11	93.92	4.73	84.94	84.25	86.76	2.67	11.08	0.43	2.67	0.11	14.47	1.56	6.97	1.18
38	20795.9	83.8	76.86	90.75	3.54	83.7	17.64	2.91	10.81	2.71	24.99	3.91	12.43	3.06	105.04	8.52	118.18	12.43	97.44	88.19	126.02	8.57	107.84	92.87	147.44	12.71	108.03	6.42	120.25	11.27	94.65	4.8	85.41	84.73	87.27	2.63	11.14	0.43	2.67	0.11	14.48	1.54	6.96	1.17
39	21343.2	84.45	77.52	91.38	3.54	84.31	17.64	2.9	10.88	2.76	25.04	3.9	12.61	3.15	105.3	8.54	118.84	12.3	98.03	88.79	126.56	8.55	108.32	93.45	147.6	12.62	108.71	6.43	120.82	11.32	95.31	4.79	85.87	85.2	87.76	2.59	11.19	0.43	2.67	0.1	14.54	1.54	6.98	1.16
40	21890.4	85.08	78.16	92	3.53	85.04	17.73	2.82	10.91	2.67	25.2	3.87	12.69	2.9	105.86	8.43	119.6	12.18	98.75	89.52	127.18	8.53	109.01	94.19	148.05	12.56	109.61	6.51	121.8	11.19	96.13	4.8	86.32	85.66	88.25	2.55	11.26	0.43	2.67	0.1	14.53	1.54	6.96	1.15
41	22437.7	85.69	78.78	92.6	3.53	85.49	17.64	2.84	11	2.64	25.07	3.94	12.85	3.03	105.92	8.5	119.57	12.26	98.88	89.86	126.79	8.36	109.07	94.48	147.55	12.37	109.95	6.5	121.88	11.46	96.57	4.83	86.76	86.12	88.72	2.5	11.29	0.42	2.67	0.1	14.52	1.54	6.94	1.15
42	22985	86.28	79.39	93.18	3.52	86.11	17.66	2.79	11.15	2.71	25.14	3.7	12.98	2.87	106.37	8.55	120	11.86	99.35	90.43	126.98	8.27	109.26	94.93	147.01	12.14	110.65	6.51	122.53	10.66	97.24	4.73	87.19	86.56	89.17	2.46	11.33	0.42	2.67	0.1	14.55	1.46	6.94	1.09
43	23532.2	86.87	79.98	93.76	3.52	86.65	17.64	2.72	11.11	2.77	25.04	3.56	13.11	2.84	106.47	8.06	120.07	11.54	100.14	91.04	128.35	8.44	109.46	95.33	146.81	12	111.11	6.45	122.78	10.23	97.78	4.56	87.61	87	89.62	2.41	11.37	0.42	2.67	0.1	14.54	1.42	6.92	1.06
44	24079.5	87.43	80.55	94.32	3.51	87.02	17.44	2.89	11.26	2.81	24.7	3.66	13.33	2.91	106.47	8.32	119.38	11.73	100.1	91.27	127.49	8.19	109.18	95.4	145.74	11.72	111.16	6.38	122.31	10.58	98.07	4.59	88.01	87.42	90.05	2.37	11.38	0.42	2.67	0.09	14.52	1.32	6.89	0.96
45	24626.7	87.99	81.11	94.86	3.51	87.55	17.53	2.98	11.3	2.75	24.72	3.74	13.4	2.88	106.98	8.48	119.78	12.06	100.78	91.87	128.36	8.26	109.55	95.89	145.77	11.62	111.72	6.35	122.83	10.78	98.63	4.61	88.4	87.84	90.47	2.32	11.42	0.42	2.67	0.09	14.53	1.34	6.88	0.98
46	25174	88.53	81.66	95.4	3.5	88.05	17.41	2.85	11.42	2.82	24.59	3.55	13.63	2.79	106.95	8.01	119.81	11.35	100.93	92.24	127.94	8.08	109.28	96.08	144.35	11.24	112.11	6.38	122.88	10.16	99.12	4.41	88.78	88.25	90.88	2.27	11.45	0.42	2.67	0.09	14.55	1.28	6.9	0.95
47	25721.3	89.05	82.19	95.92	3.5	88.65	17.42	2.86	11.6	2.91	24.7	3.46	13.68	2.77	107.46	7.7	120.45	10.73	101.45	92.82	128.25	8.02	109.91	96.71	144.92	11.23	112.82	6.43	123.66	9.8	99.79	4.16	89.16	88.65	91.28	2.22	11.5	0.42	2.67	0.09	14.54	1.28	6.87	0.93
48	26268.5	89.57	82.7	96.43	3.5	89.1	17.46	2.76	11.65	2.82	24.65	3.39	13.79	2.66	107.86	7.37	120.43	10.27	101.87	93.26	128.58	7.99	110.03	97.02	144.54	11.07	113.24	6.44	123.93	9.62	100.25	4.16	89.53	89.04	91.67	2.17	11.53	0.42	2.68	0.08	14.59	1.23	6.9	0.9
49	26815.8	90.07	83.21	96.93	3.5	89.67	17.37	2.67	11.85	2.7	24.58	3.21	14.03	2.58	108.06	6.97	120.57	9.62	101.89	93.63	127.59	7.68	109.94	97.33	143.43	10.73	113.75	6.44	124.15	9.02	100.84	3.97	89.9	89.43	92.05	2.12	11.58	0.42	2.68	0.08	14.64	1.22	6.92	0.9
50	27363	90.56	83.7	97.41	3.5	90.14	17.26	2.68	12	2.69	24.4	3.38	14.31	2.51	108.15	6.88	120.53	10.21	102.05	93.99	127.2	7.51	109.71	97.53	142.1	10.38	114.05	6.44	124.02	9.45	101.29	4.06	90.26	89.81	92.43	2.07	11.62	0.42	2.68	0.08	14.61	1.14	6.88	0.83
51	27910.3	91.03	84.18	97.89	3.5	90.61	17.22	2.61	12.03	2.6	24.27	3.3	14.39	2.4	108.46	6.56	120.33	9.88	102.36	94.4	127.25	7.42	109.8	97.84	141.68	10.2	114.4	6.42	124.17	9.35	101.74	3.96	90.61	90.18	92.79	2.02	11.65	0.42	2.68	0.07	14.67	1.09	6.91	0.8
52	28457.6	91.5	84.64	98.36	3.5	91.13	17.15	2.59	12.21	2.62	24.2	3.29	14.6	2.49	108.71	6.51	120.52	9.66	102.63	94.83	127.08	7.28	109.98	98.23	141.35	10.03	114.86	6.44	124.37	9.48	102.27	3.97	90.95	90.54	93.14	1.96	11.7	0.42	2.68	0.07	14.68	1.04	6.91	0.76
53	29004.8	91.96	85.1	98.81	3.5	91.67	17.17	2.64	12.22	2.65	24.16	3.36	14.67	2.68	109.15	6.53	120.81	9.64	103.22	95.39	127.73	7.3	110.48	98.75	141.79	10.01	115.37	6.42	124.78	9.72	102.82	4.03	91.3	90.9	93.49	1.9	11.74	0.42	2.69	0.07	14.71	1.06	6.92	0.77
54	29552.1	92.4	85.54	99.26	3.5	92.32	17.22	2.52	12.25	2.54	24.15	3.06	14.81	2.49	109.58	6.28	121.03	8.72	103.83	96.03	128.2	7.27	110.76	99.25	141.53	9.84	116.02	6.45	125.29	8.93	103.5	3.72	91.64	91.25	93.82	1.84	11.8	0.42	2.69	0.07	14.71	0.98	6.91	0.7
55	30099.3	92.84	85.97	99.71	3.5	92.73	17.17	2.51	12.26	2.53	24.03	2.89	14.8	2.58	109.89	6.1	120.97	8.05	104.19	96.42	128.5	7.25	111.1	99.61	141.91	9.83	116.32	6.43	125.48	8.52	103.88	3.47	91.98	91.59	94.15	1.78	11.84	0.42	2.69	0.06	14.76	0.97	6.94	0.69
56	30646.6	93.29	86.42	100.16	3.51	93.15	17.03	2.35	12.46	2.37	23.85	2.92	14.97	2.5	109.9	5.79	120.75	7.97	104.09	96.65	127.55	6.97	111.01	99.82	141.11	9.6	116.57	6.42	125.4	8.67	104.28	3.52	92.31	91.93	94.47	1.72	11.87	0.42	2.69	0.06	14.77	0.87	6.94	0.63
57	31193.9	93.68	86.8	100.55	3.51	93.52	17.02	2.22	12.44	2.21	23.77	2.75	15	2.42	110.11	5.55	120.76	7.43	104.3	96.96	127.47	6.88	111.17	100.09	141.01	9.5	116.87	6.39	125.59	8.16	104.63	3.41	92.64	92.26	94.78	1.65	11.89	0.42	2.69	0.05	14.76	0.82	6.94	0.6
58	31741.1	94.08	87.2	100.97	3.51	94.11	16.96	2.06	12.47	2.2	23.72	2.53	15.09	2.27	110.46	4.94	120.97	6.62	104.72	97.48	127.65	6.8	111.42	100.55	140.75	9.34	117.42	6.42	126.01	7.44	105.23	3.01	92.96	92.59	95.09	1.58	11.95	0.42	2.7	0.05	14.83	0.78	6.97	0.57
59	32288.4	94.48	87.59	101.37	3.52	94.46	16.89	1.96	12.46	2.06	23.55	2.43	15.21	2.32	110.64	4.67	120.71	6.11	104.95	97.78	127.7	6.74	111.38	100.73	140.23	9.17	117.61	6.43	125.92	7.14	105.54	2.77	93.28	92.91	95.38	1.51	11.97	0.42	2.7	0.05	14.84	0.76	6.97	0.54
60	32835.7	94.87	87.97	101.77	3.52	94.86	16.87	1.95	12.5	1.95	23.53	2.37	15.32	2.17	110.9	4.69	120.93	6.07	105.23	98.14	127.75	6.67	111.53	101.03	139.96	9.04	118	6.41	126.19	6.92	105.95	2.76	93.6	93.22	95.67	1.43	12	0.42	2.7	0.05	14.86	0.72	6.98	0.51
61	33382.9	95.25	88.33	102.16	3.53	95.28	16.74	1.86	12.54	1.87	23.22	2.26	15.54	2.08	111.04	4.37	120.56	5.76	105.42	98.47	127.62	6.56	111.24	101.15	138.75	8.72	118.12	6.39	125.8	6.58	106.3	2.53	93.91	93.53	95.96	1.35	12.02	0.42	2.7	0.05	14.87	0.69	6.99	0.49
62	33930.2	95.62	88.69	102.54	3.53	95.72	16.68	1.66	12.55	1.76	23.15	1.99	15.63	1.94	111.23	4.01	120.47	5.03	105.71	98.85	127.67	6.48	111.36	101.45	138.43	8.57	118.5	6.38	126.02	5.9	106.74	2.43	94.21	93.83	96.24	1.26	12.06	0.42	2.7	0.04	14.89	0.6	6.99	0.43
63	34477.4	95.98	89.04	102.92	3.54	96.26	16.76	1.62	12.6	1.64	23.28	1.94	15.6	1.72	111.84	3.87	121.15	4.91	106.29	99.41	128.28	6.5	112.03	102.06	139.24	8.62	119.17	6.45	126.85	5.71	107.34	2.3	94.52	94.13	96.51	1.17	12.11	0.42	2.7	0.04	14.91	0.57	7	0.42
64	35024.7	96.34	89.38	103.29	3.55	96.55	16.63	1.47	12.63	1.44	23.05	1.79	15.61	1.74	111.92	3.39	120.76	4.58	106.35	99.61	127.98	6.38	112	102.2	138.86	8.49	119.24	6.43	126.69	5.29	107.55	2.11	94.82	94.42	96.77	1.07	12.12	0.42	2.7	0.03	14.94	0.53	7.02	0.39
65	35572	96.68	89.71	103.65	3.56	96.85	16.51	1.37	12.69	1.25	22.85	1.73	15.65	1.67	112.01	2.98	120.4	4.26	106.41	99.82	127.68	6.26	112	102.37	138.51	8.36	119.35	6.43	126.56	5.05	107.8	1.84	95.11	94.7	97.03	0.96	12.14	0.42	2.7	0.03	14.93	0.49	7	0.37
66	36119.2	97.02	90.03	104.01	3.57	97.12	16.47	1.31	12.67	1.15	22.77	1.67	15.61	1.5	112.19	2.85	120.32	3.95	106.62	100.07	127.82	6.23	112.15	102.58	138.53	8.32	119.55	6.41	126.72	4.85	108.04	1.68	95.39	94.98	97.28	0.83	12.15	0.41	2.71	0.03	14.96	0.45	7.03	0.34
67	36666.5	97.36	90.35	104.36	3.58	97.44	16.25	1.02	12.86	0.95	22.44	1.4	15.75	1.1	112.09	2.21	119.73	3.4	106.49	100.22	126.97	6	111.79	102.61	137.27	8.01	119.55	6.38	126.27	4.03	108.28	1.37	95.67	95.26	97.53	0.68	12.17	0.41	2.71	0.03	14.98	0.4	7.04	0.31
68	37213.7	97.68	90.65	104.71	3.59	97.74	16.14	0.77	12.87	0.65	22.2	0.96	15.9	0.73	112.21	1.62	119.38	2.36	106.61	100.45	126.82	5.9	111.54	102.68	136.32	7.77	119.61	6.37	125.96	2.75	108.52	0.93	95.94	95.53	97.77	0.48	12.18	0.41	2.71	0.02	14.99	0.28	7.03	0.22
69	37761	98	90.95	105.05	3.6	98	16	0	13	0	22	0	16	0	112.24	0	118.87	0.01	106.57	100.6	126.31	5.75	111.39	102.76	135.65	7.58	119.68	6.36	125.74	0	108.72	0	96.2	95.8	0	0	12.19	0.41	2.71	0	14.97	0	7.02	0
70	38308.3	98.31	91.24	105.39	3.61	0	0	0	0	0	0	0	0	0	0	0	0	0	0	0	0	0	0	0	0	0	0	0	0	0	0	0	0	0	0	0	0	0	0	0	0	0	0	0
71	38855.5	98.62	91.52	105.72	3.62	0	0	0	0	0	0	0	0	0	0	0	0	0	0	0	0	0	0	0	0	0	0	0	0	0	0	0	0	0	0	0	0	0	0	0	0	0	0	0
72	39402.8	98.92	91.79	106.04	3.64	0	0	0	0	0	0	0	0	0	0	0	0	0	0	0	0	0	0	0	0	0	0	0	0	0	0	0	0	0	0	0	0	0	0	0	0	0	0	0
73	39950	99.21	92.06	106.36	3.65	0	0	0	0	0	0	0	0	0	0	0	0	0	0	0	0	0	0	0	0	0	0	0	0	0	0	0	0	0	0	0	0	0	0	0	0	0	0	0
74	40497.3	99.5	92.31	106.68	3.66	0	0	0	0	0	0	0	0	0	0	0	0	0	0	0	0	0	0	0	0	0	0	0	0	0	0	0	0	0	0	0	0	0	0	0	0	0	0	0
75	41044.6	99.78	92.56	106.99	3.68	0	0	0	0	0	0	0	0	0	0	0	0	0	0	0	0	0	0	0	0	0	0	0	0	0	0	0	0	0	0	0	0	0	0	0	0	0	0	0
76	41591.8	100.05	92.81	107.3	3.7	0	0	0	0	0	0	0	0	0	0	0	0	0	0	0	0	0	0	0	0	0	0	0	0	0	0	0	0	0	0	0	0	0	0	0	0	0	0	0
77	42139.1	100.32	93.04	107.6	3.71	0	0	0	0	0	0	0	0	0	0	0	0	0	0	0	0	0	0	0	0	0	0	0	0	0	0	0	0	0	0	0	0	0	0	0	0	0	0	0
78	42686.3	100.59	93.27	107.9	3.73	0	0	0	0	0	0	0	0	0	0	0	0	0	0	0	0	0	0	0	0	0	0	0	0	0	0	0	0	0	0	0	0	0	0	0	0	0	0	0
79	43233.6	100.84	93.49	108.2	3.75	0	0	0	0	0	0	0	0	0	0	0	0	0	0	0	0	0	0	0	0	0	0	0	0	0	0	0	0	0	0	0	0	0	0	0	0	0	0	0
80	43780.9	101.1	93.7	108.49	3.77	0	0	0	0	0	0	0	0	0	0	0	0	0	0	0	0	0	0	0	0	0	0	0	0	0	0	0	0	0	0	0	0	0	0	0	0	0	0	0
81	44328.1	101.34	93.91	108.78	3.79	0	0	0	0	0	0	0	0	0	0	0	0	0	0	0	0	0	0	0	0	0	0	0	0	0	0	0	0	0	0	0	0	0	0	0	0	0	0	0
82	44875.4	101.59	94.11	109.06	3.81	0	0	0	0	0	0	0	0	0	0	0	0	0	0	0	0	0	0	0	0	0	0	0	0	0	0	0	0	0	0	0	0	0	0	0	0	0	0	0
83	45422.7	101.82	94.3	109.34	3.84	0	0	0	0	0	0	0	0	0	0	0	0	0	0	0	0	0	0	0	0	0	0	0	0	0	0	0	0	0	0	0	0	0	0	0	0	0	0	0
84	45969.9	102.05	94.49	109.62	3.86	0	0	0	0	0	0	0	0	0	0	0	0	0	0	0	0	0	0	0	0	0	0	0	0	0	0	0	0	0	0	0	0	0	0	0	0	0	0	0
85	46517.2	102.28	94.67	109.89	3.88	0	0	0	0	0	0	0	0	0	0	0	0	0	0	0	0	0	0	0	0	0	0	0	0	0	0	0	0	0	0	0	0	0	0	0	0	0	0	0
86	47064.4	102.5	94.85	110.16	3.91	0	0	0	0	0	0	0	0	0	0	0	0	0	0	0	0	0	0	0	0	0	0	0	0	0	0	0	0	0	0	0	0	0	0	0	0	0	0	0
87	47611.7	102.72	95.01	110.43	3.93	0	0	0	0	0	0	0	0	0	0	0	0	0	0	0	0	0	0	0	0	0	0	0	0	0	0	0	0	0	0	0	0	0	0	0	0	0	0	0
88	48159	102.94	95.18	110.69	3.96	0	0	0	0	0	0	0	0	0	0	0	0	0	0	0	0	0	0	0	0	0	0	0	0	0	0	0	0	0	0	0	0	0	0	0	0	0	0	0
89	48706.2	103.14	95.33	110.95	3.98	0	0	0	0	0	0	0	0	0	0	0	0	0	0	0	0	0	0	0	0	0	0	0	0	0	0	0	0	0	0	0	0	0	0	0	0	0	0	0
90	49253.5	103.35	95.49	111.21	4.01	0	0	0	0	0	0	0	0	0	0	0	0	0	0	0	0	0	0	0	0	0	0	0	0	0	0	0	0	0	0	0	0	0	0	0	0	0	0	0
91	49800.7	103.55	95.63	111.47	4.04	0	0	0	0	0	0	0	0	0	0	0	0	0	0	0	0	0	0	0	0	0	0	0	0	0	0	0	0	0	0	0	0	0	0	0	0	0	0	0
92	50348	103.74	95.77	111.72	4.07	0	0	0	0	0	0	0	0	0	0	0	0	0	0	0	0	0	0	0	0	0	0	0	0	0	0	0	0	0	0	0	0	0	0	0	0	0	0	0
93	50895.3	103.94	95.91	111.97	4.1	0	0	0	0	0	0	0	0	0	0	0	0	0	0	0	0	0	0	0	0	0	0	0	0	0	0	0	0	0	0	0	0	0	0	0	0	0	0	0
94	51442.5	104.12	96.04	112.21	4.13	0	0	0	0	0	0	0	0	0	0	0	0	0	0	0	0	0	0	0	0	0	0	0	0	0	0	0	0	0	0	0	0	0	0	0	0	0	0	0
95	51989.8	104.31	96.16	112.46	4.16	0	0	0	0	0	0	0	0	0	0	0	0	0	0	0	0	0	0	0	0	0	0	0	0	0	0	0	0	0	0	0	0	0	0	0	0	0	0	0
96	52537	104.49	96.28	112.7	4.19	0	0	0	0	0	0	0	0	0	0	0	0	0	0	0	0	0	0	0	0	0	0	0	0	0	0	0	0	0	0	0	0	0	0	0	0	0	0	0
97	53084.3	104.66	96.4	112.93	4.22	0	0	0	0	0	0	0	0	0	0	0	0	0	0	0	0	0	0	0	0	0	0	0	0	0	0	0	0	0	0	0	0	0	0	0	0	0	0	0
98	53631.6	104.84	96.51	113.17	4.25	0	0	0	0	0	0	0	0	0	0	0	0	0	0	0	0	0	0	0	0	0	0	0	0	0	0	0	0	0	0	0	0	0	0	0	0	0	0	0
99	54178.8	105.01	96.61	113.4	4.28	0	0	0	0	0	0	0	0	0	0	0	0	0	0	0	0	0	0	0	0	0	0	0	0	0	0	0	0	0	0	0	0	0	0	0	0	0	0	0
100	54726.1	105.17	96.72	113.63	4.31	0	0	0	0	0	0	0	0	0	0	0	0	0	0	0	0	0	0	0	0	0	0	0	0	0	0	0	0	0	0	0	0	0	0	0	0	0	0	0
101	55273.3	105.33	96.81	113.85	4.35	0	0	0	0	0	0	0	0	0	0	0	0	0	0	0	0	0	0	0	0	0	0	0	0	0	0	0	0	0	0	0	0	0	0	0	0	0	0	0
102	55820.6	105.49	96.91	114.08	4.38	0	0	0	0	0	0	0	0	0	0	0	0	0	0	0	0	0	0	0	0	0	0	0	0	0	0	0	0	0	0	0	0	0	0	0	0	0	0	0
103	56367.9	105.65	97	114.3	4.41	0	0	0	0	0	0	0	0	0	0	0	0	0	0	0	0	0	0	0	0	0	0	0	0	0	0	0	0	0	0	0	0	0	0	0	0	0	0	0
104	56915.1	105.8	97.08	114.52	4.45	0	0	0	0	0	0	0	0	0	0	0	0	0	0	0	0	0	0	0	0	0	0	0	0	0	0	0	0	0	0	0	0	0	0	0	0	0	0	0
105	57462.4	105.95	97.16	114.73	4.48	0	0	0	0	0	0	0	0	0	0	0	0	0	0	0	0	0	0	0	0	0	0	0	0	0	0	0	0	0	0	0	0	0	0	0	0	0	0	0
106	58009.7	106.09	97.24	114.94	4.52	0	0	0	0	0	0	0	0	0	0	0	0	0	0	0	0	0	0	0	0	0	0	0	0	0	0	0	0	0	0	0	0	0	0	0	0	0	0	0
107	58556.9	106.24	97.32	115.16	4.55	0	0	0	0	0	0	0	0	0	0	0	0	0	0	0	0	0	0	0	0	0	0	0	0	0	0	0	0	0	0	0	0	0	0	0	0	0	0	0
108	59104.2	106.38	97.39	115.36	4.59	0	0	0	0	0	0	0	0	0	0	0	0	0	0	0	0	0	0	0	0	0	0	0	0	0	0	0	0	0	0	0	0	0	0	0	0	0	0	0
109	59651.4	106.51	97.46	115.57	4.62	0	0	0	0	0	0	0	0	0	0	0	0	0	0	0	0	0	0	0	0	0	0	0	0	0	0	0	0	0	0	0	0	0	0	0	0	0	0	0
110	60198.7	106.65	97.52	115.77	4.66	0	0	0	0	0	0	0	0	0	0	0	0	0	0	0	0	0	0	0	0	0	0	0	0	0	0	0	0	0	0	0	0	0	0	0	0	0	0	0
111	60746	106.78	97.58	115.97	4.69	0	0	0	0	0	0	0	0	0	0	0	0	0	0	0	0	0	0	0	0	0	0	0	0	0	0	0	0	0	0	0	0	0	0	0	0	0	0	0
112	61293.2	106.91	97.64	116.17	4.73	0	0	0	0	0	0	0	0	0	0	0	0	0	0	0	0	0	0	0	0	0	0	0	0	0	0	0	0	0	0	0	0	0	0	0	0	0	0	0
113	61840.5	107.03	97.7	116.37	4.76	0	0	0	0	0	0	0	0	0	0	0	0	0	0	0	0	0	0	0	0	0	0	0	0	0	0	0	0	0	0	0	0	0	0	0	0	0	0	0
114	62387.7	107.16	97.75	116.56	4.8	0	0	0	0	0	0	0	0	0	0	0	0	0	0	0	0	0	0	0	0	0	0	0	0	0	0	0	0	0	0	0	0	0	0	0	0	0	0	0
115	62935	107.28	97.8	116.75	4.83	0	0	0	0	0	0	0	0	0	0	0	0	0	0	0	0	0	0	0	0	0	0	0	0	0	0	0	0	0	0	0	0	0	0	0	0	0	0	0
116	63482.3	107.39	97.85	116.94	4.87	0	0	0	0	0	0	0	0	0	0	0	0	0	0	0	0	0	0	0	0	0	0	0	0	0	0	0	0	0	0	0	0	0	0	0	0	0	0	0
117	64029.5	107.51	97.89	117.12	4.91	0	0	0	0	0	0	0	0	0	0	0	0	0	0	0	0	0	0	0	0	0	0	0	0	0	0	0	0	0	0	0	0	0	0	0	0	0	0	0
118	64576.8	107.62	97.94	117.31	4.94	0	0	0	0	0	0	0	0	0	0	0	0	0	0	0	0	0	0	0	0	0	0	0	0	0	0	0	0	0	0	0	0	0	0	0	0	0	0	0
119	65124	107.73	97.98	117.49	4.98	0	0	0	0	0	0	0	0	0	0	0	0	0	0	0	0	0	0	0	0	0	0	0	0	0	0	0	0	0	0	0	0	0	0	0	0	0	0	0
120	65671.3	107.84	98.01	117.67	5.01	0	0	0	0	0	0	0	0	0	0	0	0	0	0	0	0	0	0	0	0	0	0	0	0	0	0	0	0	0	0	0	0	0	0	0	0	0	0	0
121	66218.6	107.95	98.05	117.84	5.05	0	0	0	0	0	0	0	0	0	0	0	0	0	0	0	0	0	0	0	0	0	0	0	0	0	0	0	0	0	0	0	0	0	0	0	0	0	0	0
122	66765.8	108.05	98.08	118.02	5.09	0	0	0	0	0	0	0	0	0	0	0	0	0	0	0	0	0	0	0	0	0	0	0	0	0	0	0	0	0	0	0	0	0	0	0	0	0	0	0
123	67313.1	108.15	98.11	118.19	5.12	0	0	0	0	0	0	0	0	0	0	0	0	0	0	0	0	0	0	0	0	0	0	0	0	0	0	0	0	0	0	0	0	0	0	0	0	0	0	0
124	67860.4	108.25	98.14	118.36	5.16	0	0	0	0	0	0	0	0	0	0	0	0	0	0	0	0	0	0	0	0	0	0	0	0	0	0	0	0	0	0	0	0	0	0	0	0	0	0	0
125	68407.6	108.35	98.17	118.53	5.19	0	0	0	0	0	0	0	0	0	0	0	0	0	0	0	0	0	0	0	0	0	0	0	0	0	0	0	0	0	0	0	0	0	0	0	0	0	0	0
126	68954.9	108.44	98.2	118.69	5.23	0	0	0	0	0	0	0	0	0	0	0	0	0	0	0	0	0	0	0	0	0	0	0	0	0	0	0	0	0	0	0	0	0	0	0	0	0	0	0
127	69502.1	108.54	98.22	118.86	5.26	0	0	0	0	0	0	0	0	0	0	0	0	0	0	0	0	0	0	0	0	0	0	0	0	0	0	0	0	0	0	0	0	0	0	0	0	0	0	0
128	70049.4	108.63	98.24	119.02	5.3	0	0	0	0	0	0	0	0	0	0	0	0	0	0	0	0	0	0	0	0	0	0	0	0	0	0	0	0	0	0	0	0	0	0	0	0	0	0	0
129	70596.6	108.72	98.26	119.18	5.33	0	0	0	0	0	0	0	0	0	0	0	0	0	0	0	0	0	0	0	0	0	0	0	0	0	0	0	0	0	0	0	0	0	0	0	0	0	0	0
130	71143.9	108.81	98.28	119.33	5.37	0	0	0	0	0	0	0	0	0	0	0	0	0	0	0	0	0	0	0	0	0	0	0	0	0	0	0	0	0	0	0	0	0	0	0	0	0	0	0
131	71691.2	108.89	98.3	119.49	5.41	0	0	0	0	0	0	0	0	0	0	0	0	0	0	0	0	0	0	0	0	0	0	0	0	0	0	0	0	0	0	0	0	0	0	0	0	0	0	0
132	72238.4	108.98	98.31	119.64	5.44	0	0	0	0	0	0	0	0	0	0	0	0	0	0	0	0	0	0	0	0	0	0	0	0	0	0	0	0	0	0	0	0	0	0	0	0	0	0	0
133	72785.7	109.06	98.33	119.79	5.47	0	0	0	0	0	0	0	0	0	0	0	0	0	0	0	0	0	0	0	0	0	0	0	0	0	0	0	0	0	0	0	0	0	0	0	0	0	0	0
134	73333	109.14	98.34	119.94	5.51	0	0	0	0	0	0	0	0	0	0	0	0	0	0	0	0	0	0	0	0	0	0	0	0	0	0	0	0	0	0	0	0	0	0	0	0	0	0	0
135	73880.2	109.22	98.35	120.08	5.54	0	0	0	0	0	0	0	0	0	0	0	0	0	0	0	0	0	0	0	0	0	0	0	0	0	0	0	0	0	0	0	0	0	0	0	0	0	0	0
136	74427.5	109.3	98.36	120.23	5.58	0	0	0	0	0	0	0	0	0	0	0	0	0	0	0	0	0	0	0	0	0	0	0	0	0	0	0	0	0	0	0	0	0	0	0	0	0	0	0
137	74974.7	109.37	98.37	120.37	5.61	0	0	0	0	0	0	0	0	0	0	0	0	0	0	0	0	0	0	0	0	0	0	0	0	0	0	0	0	0	0	0	0	0	0	0	0	0	0	0
138	75522	109.45	98.38	120.51	5.65	0	0	0	0	0	0	0	0	0	0	0	0	0	0	0	0	0	0	0	0	0	0	0	0	0	0	0	0	0	0	0	0	0	0	0	0	0	0	0
139	76069.3	109.52	98.39	120.65	5.68	0	0	0	0	0	0	0	0	0	0	0	0	0	0	0	0	0	0	0	0	0	0	0	0	0	0	0	0	0	0	0	0	0	0	0	0	0	0	0
140	76616.5	109.59	98.39	120.79	5.71	0	0	0	0	0	0	0	0	0	0	0	0	0	0	0	0	0	0	0	0	0	0	0	0	0	0	0	0	0	0	0	0	0	0	0	0	0	0	0
141	77163.8	109.66	98.4	120.92	5.75	0	0	0	0	0	0	0	0	0	0	0	0	0	0	0	0	0	0	0	0	0	0	0	0	0	0	0	0	0	0	0	0	0	0	0	0	0	0	0
142	77711	109.73	98.4	121.05	5.78	0	0	0	0	0	0	0	0	0	0	0	0	0	0	0	0	0	0	0	0	0	0	0	0	0	0	0	0	0	0	0	0	0	0	0	0	0	0	0
143	78258.3	109.79	98.4	121.18	5.81	0	0	0	0	0	0	0	0	0	0	0	0	0	0	0	0	0	0	0	0	0	0	0	0	0	0	0	0	0	0	0	0	0	0	0	0	0	0	0
144	78805.6	109.86	98.4	121.31	5.84	0	0	0	0	0	0	0	0	0	0	0	0	0	0	0	0	0	0	0	0	0	0	0	0	0	0	0	0	0	0	0	0	0	0	0	0	0	0	0
145	79352.8	109.92	98.4	121.44	5.88	0	0	0	0	0	0	0	0	0	0	0	0	0	0	0	0	0	0	0	0	0	0	0	0	0	0	0	0	0	0	0	0	0	0	0	0	0	0	0
146	79900.1	109.98	98.4	121.56	5.91	0	0	0	0	0	0	0	0	0	0	0	0	0	0	0	0	0	0	0	0	0	0	0	0	0	0	0	0	0	0	0	0	0	0	0	0	0	0	0
147	80447.4	110.05	98.4	121.69	5.94	0	0	0	0	0	0	0	0	0	0	0	0	0	0	0	0	0	0	0	0	0	0	0	0	0	0	0	0	0	0	0	0	0	0	0	0	0	0	0
148	80994.6	110.11	98.4	121.81	5.97	0	0	0	0	0	0	0	0	0	0	0	0	0	0	0	0	0	0	0	0	0	0	0	0	0	0	0	0	0	0	0	0	0	0	0	0	0	0	0
149	81541.9	110.16	98.4	121.93	6	0	0	0	0	0	0	0	0	0	0	0	0	0	0	0	0	0	0	0	0	0	0	0	0	0	0	0	0	0	0	0	0	0	0	0	0	0	0	0
150	82089.1	110.22	98.4	122.05	6.03	0	0	0	0	0	0	0	0	0	0	0	0	0	0	0	0	0	0	0	0	0	0	0	0	0	0	0	0	0	0	0	0	0	0	0	0	0	0	0
151	82636.4	110.28	98.39	122.16	6.06	0	0	0	0	0	0	0	0	0	0	0	0	0	0	0	0	0	0	0	0	0	0	0	0	0	0	0	0	0	0	0	0	0	0	0	0	0	0	0
152	83183.6	110.33	98.39	122.28	6.09	0	0	0	0	0	0	0	0	0	0	0	0	0	0	0	0	0	0	0	0	0	0	0	0	0	0	0	0	0	0	0	0	0	0	0	0	0	0	0
153	83730.9	110.39	98.38	122.39	6.12	0	0	0	0	0	0	0	0	0	0	0	0	0	0	0	0	0	0	0	0	0	0	0	0	0	0	0	0	0	0	0	0	0	0	0	0	0	0	0
154	84278.2	110.44	98.38	122.5	6.15	0	0	0	0	0	0	0	0	0	0	0	0	0	0	0	0	0	0	0	0	0	0	0	0	0	0	0	0	0	0	0	0	0	0	0	0	0	0	0
155	84825.4	110.49	98.37	122.61	6.18	0	0	0	0	0	0	0	0	0	0	0	0	0	0	0	0	0	0	0	0	0	0	0	0	0	0	0	0	0	0	0	0	0	0	0	0	0	0	0
156	85372.7	110.54	98.36	122.72	6.21	0	0	0	0	0	0	0	0	0	0	0	0	0	0	0	0	0	0	0	0	0	0	0	0	0	0	0	0	0	0	0	0	0	0	0	0	0	0	0
157	85920	110.59	98.36	122.82	6.24	0	0	0	0	0	0	0	0	0	0	0	0	0	0	0	0	0	0	0	0	0	0	0	0	0	0	0	0	0	0	0	0	0	0	0	0	0	0	0
158	86467.2	110.64	98.35	122.93	6.27	0	0	0	0	0	0	0	0	0	0	0	0	0	0	0	0	0	0	0	0	0	0	0	0	0	0	0	0	0	0	0	0	0	0	0	0	0	0	0
159	87014.5	110.69	98.34	123.03	6.3	0	0	0	0	0	0	0	0	0	0	0	0	0	0	0	0	0	0	0	0	0	0	0	0	0	0	0	0	0	0	0	0	0	0	0	0	0	0	0
160	87561.7	110.73	98.33	123.13	6.33	0	0	0	0	0	0	0	0	0	0	0	0	0	0	0	0	0	0	0	0	0	0	0	0	0	0	0	0	0	0	0	0	0	0	0	0	0	0	0
161	88109	110.78	98.32	123.23	6.35	0	0	0	0	0	0	0	0	0	0	0	0	0	0	0	0	0	0	0	0	0	0	0	0	0	0	0	0	0	0	0	0	0	0	0	0	0	0	0
162	88656.3	110.82	98.31	123.33	6.38	0	0	0	0	0	0	0	0	0	0	0	0	0	0	0	0	0	0	0	0	0	0	0	0	0	0	0	0	0	0	0	0	0	0	0	0	0	0	0
163	89203.5	110.87	98.31	123.43	6.41	0	0	0	0	0	0	0	0	0	0	0	0	0	0	0	0	0	0	0	0	0	0	0	0	0	0	0	0	0	0	0	0	0	0	0	0	0	0	0
164	89750.8	110.91	98.3	123.52	6.44	0	0	0	0	0	0	0	0	0	0	0	0	0	0	0	0	0	0	0	0	0	0	0	0	0	0	0	0	0	0	0	0	0	0	0	0	0	0	0
165	90298	110.95	98.28	123.62	6.46	0	0	0	0	0	0	0	0	0	0	0	0	0	0	0	0	0	0	0	0	0	0	0	0	0	0	0	0	0	0	0	0	0	0	0	0	0	0	0
166	90845.3	110.99	98.27	123.71	6.49	0	0	0	0	0	0	0	0	0	0	0	0	0	0	0	0	0	0	0	0	0	0	0	0	0	0	0	0	0	0	0	0	0	0	0	0	0	0	0
167	91392.6	111.03	98.26	123.8	6.52	0	0	0	0	0	0	0	0	0	0	0	0	0	0	0	0	0	0	0	0	0	0	0	0	0	0	0	0	0	0	0	0	0	0	0	0	0	0	0
168	91939.8	111.07	98.25	123.89	6.54	0	0	0	0	0	0	0	0	0	0	0	0	0	0	0	0	0	0	0	0	0	0	0	0	0	0	0	0	0	0	0	0	0	0	0	0	0	0	0
169	92487.1	111.11	98.24	123.98	6.57	0	0	0	0	0	0	0	0	0	0	0	0	0	0	0	0	0	0	0	0	0	0	0	0	0	0	0	0	0	0	0	0	0	0	0	0	0	0	0
170	93034.4	111.15	98.23	124.07	6.59	0	0	0	0	0	0	0	0	0	0	0	0	0	0	0	0	0	0	0	0	0	0	0	0	0	0	0	0	0	0	0	0	0	0	0	0	0	0	0
171	93581.6	111.18	98.22	124.15	6.62	0	0	0	0	0	0	0	0	0	0	0	0	0	0	0	0	0	0	0	0	0	0	0	0	0	0	0	0	0	0	0	0	0	0	0	0	0	0	0
172	94128.9	111.22	98.2	124.24	6.64	0	0	0	0	0	0	0	0	0	0	0	0	0	0	0	0	0	0	0	0	0	0	0	0	0	0	0	0	0	0	0	0	0	0	0	0	0	0	0
173	94676.1	111.26	98.19	124.32	6.67	0	0	0	0	0	0	0	0	0	0	0	0	0	0	0	0	0	0	0	0	0	0	0	0	0	0	0	0	0	0	0	0	0	0	0	0	0	0	0
174	95223.4	111.29	98.18	124.4	6.69	0	0	0	0	0	0	0	0	0	0	0	0	0	0	0	0	0	0	0	0	0	0	0	0	0	0	0	0	0	0	0	0	0	0	0	0	0	0	0
175	95770.6	111.32	98.17	124.48	6.71	0	0	0	0	0	0	0	0	0	0	0	0	0	0	0	0	0	0	0	0	0	0	0	0	0	0	0	0	0	0	0	0	0	0	0	0	0	0	0
176	96317.9	111.36	98.15	124.56	6.74	0	0	0	0	0	0	0	0	0	0	0	0	0	0	0	0	0	0	0	0	0	0	0	0	0	0	0	0	0	0	0	0	0	0	0	0	0	0	0
177	96865.2	111.39	98.14	124.64	6.76	0	0	0	0	0	0	0	0	0	0	0	0	0	0	0	0	0	0	0	0	0	0	0	0	0	0	0	0	0	0	0	0	0	0	0	0	0	0	0
178	97412.4	111.42	98.13	124.72	6.78	0	0	0	0	0	0	0	0	0	0	0	0	0	0	0	0	0	0	0	0	0	0	0	0	0	0	0	0	0	0	0	0	0	0	0	0	0	0	0
179	97959.7	111.45	98.11	124.79	6.81	0	0	0	0	0	0	0	0	0	0	0	0	0	0	0	0	0	0	0	0	0	0	0	0	0	0	0	0	0	0	0	0	0	0	0	0	0	0	0
180	98507	111.48	98.1	124.87	6.83	0	0	0	0	0	0	0	0	0	0	0	0	0	0	0	0	0	0	0	0	0	0	0	0	0	0	0	0	0	0	0	0	0	0	0	0	0	0	0
181	99054.2	111.51	98.09	124.94	6.85	0	0	0	0	0	0	0	0	0	0	0	0	0	0	0	0	0	0	0	0	0	0	0	0	0	0	0	0	0	0	0	0	0	0	0	0	0	0	0
182	99601.5	111.54	98.07	125.01	6.87	0	0	0	0	0	0	0	0	0	0	0	0	0	0	0	0	0	0	0	0	0	0	0	0	0	0	0	0	0	0	0	0	0	0	0	0	0	0	0
183	100149	111.57	98.06	125.08	6.89	0	0	0	0	0	0	0	0	0	0	0	0	0	0	0	0	0	0	0	0	0	0	0	0	0	0	0	0	0	0	0	0	0	0	0	0	0	0	0
184	100696	111.6	98.05	125.15	6.91	0	0	0	0	0	0	0	0	0	0	0	0	0	0	0	0	0	0	0	0	0	0	0	0	0	0	0	0	0	0	0	0	0	0	0	0	0	0	0
185	101243	111.63	98.03	125.22	6.94	0	0	0	0	0	0	0	0	0	0	0	0	0	0	0	0	0	0	0	0	0	0	0	0	0	0	0	0	0	0	0	0	0	0	0	0	0	0	0
186	101791	111.65	98.02	125.29	6.96	0	0	0	0	0	0	0	0	0	0	0	0	0	0	0	0	0	0	0	0	0	0	0	0	0	0	0	0	0	0	0	0	0	0	0	0	0	0	0
187	102338	111.68	98	125.35	6.98	0	0	0	0	0	0	0	0	0	0	0	0	0	0	0	0	0	0	0	0	0	0	0	0	0	0	0	0	0	0	0	0	0	0	0	0	0	0	0
188	102885	111.7	97.99	125.42	7	0	0	0	0	0	0	0	0	0	0	0	0	0	0	0	0	0	0	0	0	0	0	0	0	0	0	0	0	0	0	0	0	0	0	0	0	0	0	0
189	103432	111.73	97.98	125.48	7.02	0	0	0	0	0	0	0	0	0	0	0	0	0	0	0	0	0	0	0	0	0	0	0	0	0	0	0	0	0	0	0	0	0	0	0	0	0	0	0
190	103980	111.75	97.96	125.55	7.04	0	0	0	0	0	0	0	0	0	0	0	0	0	0	0	0	0	0	0	0	0	0	0	0	0	0	0	0	0	0	0	0	0	0	0	0	0	0	0
191	104527	111.78	97.95	125.61	7.06	0	0	0	0	0	0	0	0	0	0	0	0	0	0	0	0	0	0	0	0	0	0	0	0	0	0	0	0	0	0	0	0	0	0	0	0	0	0	0
192	105074	111.8	97.93	125.67	7.08	0	0	0	0	0	0	0	0	0	0	0	0	0	0	0	0	0	0	0	0	0	0	0	0	0	0	0	0	0	0	0	0	0	0	0	0	0	0	0
193	105621	111.83	97.92	125.73	7.09	0	0	0	0	0	0	0	0	0	0	0	0	0	0	0	0	0	0	0	0	0	0	0	0	0	0	0	0	0	0	0	0	0	0	0	0	0	0	0
194	106169	111.85	97.91	125.79	7.11	0	0	0	0	0	0	0	0	0	0	0	0	0	0	0	0	0	0	0	0	0	0	0	0	0	0	0	0	0	0	0	0	0	0	0	0	0	0	0
195	106716	111.87	97.89	125.85	7.13	0	0	0	0	0	0	0	0	0	0	0	0	0	0	0	0	0	0	0	0	0	0	0	0	0	0	0	0	0	0	0	0	0	0	0	0	0	0	0
196	107263	111.89	97.88	125.9	7.15	0	0	0	0	0	0	0	0	0	0	0	0	0	0	0	0	0	0	0	0	0	0	0	0	0	0	0	0	0	0	0	0	0	0	0	0	0	0	0
197	107810	111.91	97.87	125.96	7.17	0	0	0	0	0	0	0	0	0	0	0	0	0	0	0	0	0	0	0	0	0	0	0	0	0	0	0	0	0	0	0	0	0	0	0	0	0	0	0
198	108358	111.93	97.85	126.02	7.19	0	0	0	0	0	0	0	0	0	0	0	0	0	0	0	0	0	0	0	0	0	0	0	0	0	0	0	0	0	0	0	0	0	0	0	0	0	0	0
199	108905	111.95	97.84	126.07	7.2	0	0	0	0	0	0	0	0	0	0	0	0	0	0	0	0	0	0	0	0	0	0	0	0	0	0	0	0	0	0	0	0	0	0	0	0	0	0	0
200	109452	111.97	97.82	126.12	7.22	0	0	0	0	0	0	0	0	0	0	0	0	0	0	0	0	0	0	0	0	0	0	0	0	0	0	0	0	0	0	0	0	0	0	0	0	0	0	0
201	109999	111.99	97.81	126.18	7.24	0	0	0	0	0	0	0	0	0	0	0	0	0	0	0	0	0	0	0	0	0	0	0	0	0	0	0	0	0	0	0	0	0	0	0	0	0	0	0
202	110547	112.01	97.8	126.23	7.25	0	0	0	0	0	0	0	0	0	0	0	0	0	0	0	0	0	0	0	0	0	0	0	0	0	0	0	0	0	0	0	0	0	0	0	0	0	0	0
203	111094	112.03	97.78	126.28	7.27	0	0	0	0	0	0	0	0	0	0	0	0	0	0	0	0	0	0	0	0	0	0	0	0	0	0	0	0	0	0	0	0	0	0	0	0	0	0	0
204	111641	112.05	97.77	126.33	7.29	0	0	0	0	0	0	0	0	0	0	0	0	0	0	0	0	0	0	0	0	0	0	0	0	0	0	0	0	0	0	0	0	0	0	0	0	0	0	0
205	112188	112.07	97.76	126.38	7.3	0	0	0	0	0	0	0	0	0	0	0	0	0	0	0	0	0	0	0	0	0	0	0	0	0	0	0	0	0	0	0	0	0	0	0	0	0	0	0
206	112736	112.09	97.74	126.43	7.32	0	0	0	0	0	0	0	0	0	0	0	0	0	0	0	0	0	0	0	0	0	0	0	0	0	0	0	0	0	0	0	0	0	0	0	0	0	0	0
207	113283	112.1	97.73	126.48	7.33	0	0	0	0	0	0	0	0	0	0	0	0	0	0	0	0	0	0	0	0	0	0	0	0	0	0	0	0	0	0	0	0	0	0	0	0	0	0	0
208	113830	112.12	97.72	126.52	7.35	0	0	0	0	0	0	0	0	0	0	0	0	0	0	0	0	0	0	0	0	0	0	0	0	0	0	0	0	0	0	0	0	0	0	0	0	0	0	0
209	114378	112.14	97.7	126.57	7.36	0	0	0	0	0	0	0	0	0	0	0	0	0	0	0	0	0	0	0	0	0	0	0	0	0	0	0	0	0	0	0	0	0	0	0	0	0	0	0
210	114925	112.15	97.69	126.61	7.38	0	0	0	0	0	0	0	0	0	0	0	0	0	0	0	0	0	0	0	0	0	0	0	0	0	0	0	0	0	0	0	0	0	0	0	0	0	0	0
211	115472	112.17	97.68	126.66	7.39	0	0	0	0	0	0	0	0	0	0	0	0	0	0	0	0	0	0	0	0	0	0	0	0	0	0	0	0	0	0	0	0	0	0	0	0	0	0	0
212	116019	112.18	97.66	126.7	7.41	0	0	0	0	0	0	0	0	0	0	0	0	0	0	0	0	0	0	0	0	0	0	0	0	0	0	0	0	0	0	0	0	0	0	0	0	0	0	0
213	116567	112.2	97.65	126.75	7.42	0	0	0	0	0	0	0	0	0	0	0	0	0	0	0	0	0	0	0	0	0	0	0	0	0	0	0	0	0	0	0	0	0	0	0	0	0	0	0
214	117114	112.21	97.64	126.79	7.44	0	0	0	0	0	0	0	0	0	0	0	0	0	0	0	0	0	0	0	0	0	0	0	0	0	0	0	0	0	0	0	0	0	0	0	0	0	0	0
215	117661	112.23	97.63	126.83	7.45	0	0	0	0	0	0	0	0	0	0	0	0	0	0	0	0	0	0	0	0	0	0	0	0	0	0	0	0	0	0	0	0	0	0	0	0	0	0	0
216	118208	112.24	97.61	126.87	7.46	0	0	0	0	0	0	0	0	0	0	0	0	0	0	0	0	0	0	0	0	0	0	0	0	0	0	0	0	0	0	0	0	0	0	0	0	0	0	0
217	118756	112.26	97.6	126.91	7.48	0	0	0	0	0	0	0	0	0	0	0	0	0	0	0	0	0	0	0	0	0	0	0	0	0	0	0	0	0	0	0	0	0	0	0	0	0	0	0
218	119303	112.27	97.59	126.95	7.49	0	0	0	0	0	0	0	0	0	0	0	0	0	0	0	0	0	0	0	0	0	0	0	0	0	0	0	0	0	0	0	0	0	0	0	0	0	0	0
219	119850	112.28	97.58	126.99	7.5	0	0	0	0	0	0	0	0	0	0	0	0	0	0	0	0	0	0	0	0	0	0	0	0	0	0	0	0	0	0	0	0	0	0	0	0	0	0	0
220	120397	112.3	97.56	127.03	7.52	0	0	0	0	0	0	0	0	0	0	0	0	0	0	0	0	0	0	0	0	0	0	0	0	0	0	0	0	0	0	0	0	0	0	0	0	0	0	0
221	120945	112.31	97.55	127.07	7.53	0	0	0	0	0	0	0	0	0	0	0	0	0	0	0	0	0	0	0	0	0	0	0	0	0	0	0	0	0	0	0	0	0	0	0	0	0	0	0
222	121492	112.32	97.54	127.1	7.54	0	0	0	0	0	0	0	0	0	0	0	0	0	0	0	0	0	0	0	0	0	0	0	0	0	0	0	0	0	0	0	0	0	0	0	0	0	0	0
223	122039	112.33	97.53	127.14	7.55	0	0	0	0	0	0	0	0	0	0	0	0	0	0	0	0	0	0	0	0	0	0	0	0	0	0	0	0	0	0	0	0	0	0	0	0	0	0	0
224	122586	112.35	97.52	127.18	7.57	0	0	0	0	0	0	0	0	0	0	0	0	0	0	0	0	0	0	0	0	0	0	0	0	0	0	0	0	0	0	0	0	0	0	0	0	0	0	0
225	123134	112.36	97.5	127.21	7.58	0	0	0	0	0	0	0	0	0	0	0	0	0	0	0	0	0	0	0	0	0	0	0	0	0	0	0	0	0	0	0	0	0	0	0	0	0	0	0
226	123681	112.37	97.49	127.24	7.59	0	0	0	0	0	0	0	0	0	0	0	0	0	0	0	0	0	0	0	0	0	0	0	0	0	0	0	0	0	0	0	0	0	0	0	0	0	0	0
227	124228	112.38	97.48	127.28	7.6	0	0	0	0	0	0	0	0	0	0	0	0	0	0	0	0	0	0	0	0	0	0	0	0	0	0	0	0	0	0	0	0	0	0	0	0	0	0	0
228	124775	112.39	97.47	127.31	7.61	0	0	0	0	0	0	0	0	0	0	0	0	0	0	0	0	0	0	0	0	0	0	0	0	0	0	0	0	0	0	0	0	0	0	0	0	0	0	0
229	125323	112.4	97.46	127.34	7.62	0	0	0	0	0	0	0	0	0	0	0	0	0	0	0	0	0	0	0	0	0	0	0	0	0	0	0	0	0	0	0	0	0	0	0	0	0	0	0
230	125870	112.41	97.45	127.38	7.64	0	0	0	0	0	0	0	0	0	0	0	0	0	0	0	0	0	0	0	0	0	0	0	0	0	0	0	0	0	0	0	0	0	0	0	0	0	0	0
231	126417	112.42	97.44	127.41	7.65	0	0	0	0	0	0	0	0	0	0	0	0	0	0	0	0	0	0	0	0	0	0	0	0	0	0	0	0	0	0	0	0	0	0	0	0	0	0	0
232	126965	112.43	97.42	127.44	7.66	0	0	0	0	0	0	0	0	0	0	0	0	0	0	0	0	0	0	0	0	0	0	0	0	0	0	0	0	0	0	0	0	0	0	0	0	0	0	0
233	127512	112.44	97.41	127.47	7.67	0	0	0	0	0	0	0	0	0	0	0	0	0	0	0	0	0	0	0	0	0	0	0	0	0	0	0	0	0	0	0	0	0	0	0	0	0	0	0
234	128059	112.45	97.4	127.5	7.68	0	0	0	0	0	0	0	0	0	0	0	0	0	0	0	0	0	0	0	0	0	0	0	0	0	0	0	0	0	0	0	0	0	0	0	0	0	0	0
235	128606	112.46	97.39	127.53	7.69	0	0	0	0	0	0	0	0	0	0	0	0	0	0	0	0	0	0	0	0	0	0	0	0	0	0	0	0	0	0	0	0	0	0	0	0	0	0	0
236	129154	112.47	97.38	127.56	7.7	0	0	0	0	0	0	0	0	0	0	0	0	0	0	0	0	0	0	0	0	0	0	0	0	0	0	0	0	0	0	0	0	0	0	0	0	0	0	0
237	129701	112.48	97.37	127.59	7.71	0	0	0	0	0	0	0	0	0	0	0	0	0	0	0	0	0	0	0	0	0	0	0	0	0	0	0	0	0	0	0	0	0	0	0	0	0	0	0
238	130248	112.49	97.36	127.62	7.72	0	0	0	0	0	0	0	0	0	0	0	0	0	0	0	0	0	0	0	0	0	0	0	0	0	0	0	0	0	0	0	0	0	0	0	0	0	0	0
239	130795	112.5	97.35	127.64	7.73	0	0	0	0	0	0	0	0	0	0	0	0	0	0	0	0	0	0	0	0	0	0	0	0	0	0	0	0	0	0	0	0	0	0	0	0	0	0	0
240	131343	112.51	97.34	127.67	7.74	0	0	0	0	0	0	0	0	0	0	0	0	0	0	0	0	0	0	0	0	0	0	0	0	0	0	0	0	0	0	0	0	0	0	0	0	0	0	0
241	131890	112.51	97.33	127.7	7.75	0	0	0	0	0	0	0	0	0	0	0	0	0	0	0	0	0	0	0	0	0	0	0	0	0	0	0	0	0	0	0	0	0	0	0	0	0	0	0
242	132437	112.52	97.32	127.72	7.76	0	0	0	0	0	0	0	0	0	0	0	0	0	0	0	0	0	0	0	0	0	0	0	0	0	0	0	0	0	0	0	0	0	0	0	0	0	0	0
243	132984	112.53	97.31	127.75	7.76	0	0	0	0	0	0	0	0	0	0	0	0	0	0	0	0	0	0	0	0	0	0	0	0	0	0	0	0	0	0	0	0	0	0	0	0	0	0	0
244	133532	112.54	97.3	127.77	7.77	0	0	0	0	0	0	0	0	0	0	0	0	0	0	0	0	0	0	0	0	0	0	0	0	0	0	0	0	0	0	0	0	0	0	0	0	0	0	0
245	134079	112.55	97.29	127.8	7.78	0	0	0	0	0	0	0	0	0	0	0	0	0	0	0	0	0	0	0	0	0	0	0	0	0	0	0	0	0	0	0	0	0	0	0	0	0	0	0
246	134626	112.55	97.28	127.82	7.79	0	0	0	0	0	0	0	0	0	0	0	0	0	0	0	0	0	0	0	0	0	0	0	0	0	0	0	0	0	0	0	0	0	0	0	0	0	0	0
247	135173	112.56	97.27	127.85	7.8	0	0	0	0	0	0	0	0	0	0	0	0	0	0	0	0	0	0	0	0	0	0	0	0	0	0	0	0	0	0	0	0	0	0	0	0	0	0	0
248	135721	112.57	97.27	127.87	7.81	0	0	0	0	0	0	0	0	0	0	0	0	0	0	0	0	0	0	0	0	0	0	0	0	0	0	0	0	0	0	0	0	0	0	0	0	0	0	0
249	136268	112.58	97.26	127.9	7.82	0	0	0	0	0	0	0	0	0	0	0	0	0	0	0	0	0	0	0	0	0	0	0	0	0	0	0	0	0	0	0	0	0	0	0	0	0	0	0
250	136815	112.58	97.25	127.92	7.82	0	0	0	0	0	0	0	0	0	0	0	0	0	0	0	0	0	0	0	0	0	0	0	0	0	0	0	0	0	0	0	0	0	0	0	0	0	0	0
251	137362	112.59	97.24	127.94	7.83	0	0	0	0	0	0	0	0	0	0	0	0	0	0	0	0	0	0	0	0	0	0	0	0	0	0	0	0	0	0	0	0	0	0	0	0	0	0	0
252	137910	112.6	97.23	127.96	7.84	0	0	0	0	0	0	0	0	0	0	0	0	0	0	0	0	0	0	0	0	0	0	0	0	0	0	0	0	0	0	0	0	0	0	0	0	0	0	0
253	138457	112.6	97.22	127.98	7.85	0	0	0	0	0	0	0	0	0	0	0	0	0	0	0	0	0	0	0	0	0	0	0	0	0	0	0	0	0	0	0	0	0	0	0	0	0	0	0
254	139004	112.61	97.21	128.01	7.86	0	0	0	0	0	0	0	0	0	0	0	0	0	0	0	0	0	0	0	0	0	0	0	0	0	0	0	0	0	0	0	0	0	0	0	0	0	0	0
255	139552	112.61	97.2	128.03	7.86	0	0	0	0	0	0	0	0	0	0	0	0	0	0	0	0	0	0	0	0	0	0	0	0	0	0	0	0	0	0	0	0	0	0	0	0	0	0	0
256	140099	112.62	97.2	128.05	7.87	0	0	0	0	0	0	0	0	0	0	0	0	0	0	0	0	0	0	0	0	0	0	0	0	0	0	0	0	0	0	0	0	0	0	0	0	0	0	0
257	140646	112.63	97.19	128.07	7.88	0	0	0	0	0	0	0	0	0	0	0	0	0	0	0	0	0	0	0	0	0	0	0	0	0	0	0	0	0	0	0	0	0	0	0	0	0	0	0
258	141193	112.63	97.18	128.09	7.88	0	0	0	0	0	0	0	0	0	0	0	0	0	0	0	0	0	0	0	0	0	0	0	0	0	0	0	0	0	0	0	0	0	0	0	0	0	0	0
259	141741	112.64	97.17	128.11	7.89	0	0	0	0	0	0	0	0	0	0	0	0	0	0	0	0	0	0	0	0	0	0	0	0	0	0	0	0	0	0	0	0	0	0	0	0	0	0	0
260	142288	112.64	97.16	128.12	7.9	0	0	0	0	0	0	0	0	0	0	0	0	0	0	0	0	0	0	0	0	0	0	0	0	0	0	0	0	0	0	0	0	0	0	0	0	0	0	0
261	142835	112.65	97.16	128.14	7.91	0	0	0	0	0	0	0	0	0	0	0	0	0	0	0	0	0	0	0	0	0	0	0	0	0	0	0	0	0	0	0	0	0	0	0	0	0	0	0
262	143382	112.65	97.15	128.16	7.91	0	0	0	0	0	0	0	0	0	0	0	0	0	0	0	0	0	0	0	0	0	0	0	0	0	0	0	0	0	0	0	0	0	0	0	0	0	0	0
263	143930	112.66	97.14	128.18	7.92	0	0	0	0	0	0	0	0	0	0	0	0	0	0	0	0	0	0	0	0	0	0	0	0	0	0	0	0	0	0	0	0	0	0	0	0	0	0	0
264	144477	112.67	97.13	128.2	7.92	0	0	0	0	0	0	0	0	0	0	0	0	0	0	0	0	0	0	0	0	0	0	0	0	0	0	0	0	0	0	0	0	0	0	0	0	0	0	0
265	145024	112.67	97.13	128.22	7.93	0	0	0	0	0	0	0	0	0	0	0	0	0	0	0	0	0	0	0	0	0	0	0	0	0	0	0	0	0	0	0	0	0	0	0	0	0	0	0
266	145571	112.68	97.12	128.23	7.94	0	0	0	0	0	0	0	0	0	0	0	0	0	0	0	0	0	0	0	0	0	0	0	0	0	0	0	0	0	0	0	0	0	0	0	0	0	0	0
267	146119	112.68	97.11	128.25	7.94	0	0	0	0	0	0	0	0	0	0	0	0	0	0	0	0	0	0	0	0	0	0	0	0	0	0	0	0	0	0	0	0	0	0	0	0	0	0	0
268	146666	112.68	97.1	128.27	7.95	0	0	0	0	0	0	0	0	0	0	0	0	0	0	0	0	0	0	0	0	0	0	0	0	0	0	0	0	0	0	0	0	0	0	0	0	0	0	0
269	147213	112.69	97.1	128.28	7.96	0	0	0	0	0	0	0	0	0	0	0	0	0	0	0	0	0	0	0	0	0	0	0	0	0	0	0	0	0	0	0	0	0	0	0	0	0	0	0
270	147760	112.69	97.09	128.3	7.96	0	0	0	0	0	0	0	0	0	0	0	0	0	0	0	0	0	0	0	0	0	0	0	0	0	0	0	0	0	0	0	0	0	0	0	0	0	0	0
271	148308	112.7	97.08	128.31	7.97	0	0	0	0	0	0	0	0	0	0	0	0	0	0	0	0	0	0	0	0	0	0	0	0	0	0	0	0	0	0	0	0	0	0	0	0	0	0	0
272	148855	112.7	97.08	128.33	7.97	0	0	0	0	0	0	0	0	0	0	0	0	0	0	0	0	0	0	0	0	0	0	0	0	0	0	0	0	0	0	0	0	0	0	0	0	0	0	0
273	149402	112.71	97.07	128.34	7.98	0	0	0	0	0	0	0	0	0	0	0	0	0	0	0	0	0	0	0	0	0	0	0	0	0	0	0	0	0	0	0	0	0	0	0	0	0	0	0
274	149949	112.71	97.06	128.36	7.98	0	0	0	0	0	0	0	0	0	0	0	0	0	0	0	0	0	0	0	0	0	0	0	0	0	0	0	0	0	0	0	0	0	0	0	0	0	0	0
275	150497	112.72	97.06	128.37	7.99	0	0	0	0	0	0	0	0	0	0	0	0	0	0	0	0	0	0	0	0	0	0	0	0	0	0	0	0	0	0	0	0	0	0	0	0	0	0	0
276	151044	112.72	97.05	128.39	7.99	0	0	0	0	0	0	0	0	0	0	0	0	0	0	0	0	0	0	0	0	0	0	0	0	0	0	0	0	0	0	0	0	0	0	0	0	0	0	0
277	151591	112.72	97.04	128.4	8	0	0	0	0	0	0	0	0	0	0	0	0	0	0	0	0	0	0	0	0	0	0	0	0	0	0	0	0	0	0	0	0	0	0	0	0	0	0	0
278	152139	112.73	97.04	128.42	8	0	0	0	0	0	0	0	0	0	0	0	0	0	0	0	0	0	0	0	0	0	0	0	0	0	0	0	0	0	0	0	0	0	0	0	0	0	0	0
279	152686	112.73	97.03	128.43	8.01	0	0	0	0	0	0	0	0	0	0	0	0	0	0	0	0	0	0	0	0	0	0	0	0	0	0	0	0	0	0	0	0	0	0	0	0	0	0	0
280	153233	112.73	97.03	128.44	8.01	0	0	0	0	0	0	0	0	0	0	0	0	0	0	0	0	0	0	0	0	0	0	0	0	0	0	0	0	0	0	0	0	0	0	0	0	0	0	0
281	153780	112.74	97.02	128.46	8.02	0	0	0	0	0	0	0	0	0	0	0	0	0	0	0	0	0	0	0	0	0	0	0	0	0	0	0	0	0	0	0	0	0	0	0	0	0	0	0
282	154328	112.74	97.01	128.47	8.02	0	0	0	0	0	0	0	0	0	0	0	0	0	0	0	0	0	0	0	0	0	0	0	0	0	0	0	0	0	0	0	0	0	0	0	0	0	0	0
283	154875	112.74	97.01	128.48	8.03	0	0	0	0	0	0	0	0	0	0	0	0	0	0	0	0	0	0	0	0	0	0	0	0	0	0	0	0	0	0	0	0	0	0	0	0	0	0	0
284	155422	112.75	97	128.49	8.03	0	0	0	0	0	0	0	0	0	0	0	0	0	0	0	0	0	0	0	0	0	0	0	0	0	0	0	0	0	0	0	0	0	0	0	0	0	0	0
285	155969	112.75	97	128.51	8.04	0	0	0	0	0	0	0	0	0	0	0	0	0	0	0	0	0	0	0	0	0	0	0	0	0	0	0	0	0	0	0	0	0	0	0	0	0	0	0
286	156517	112.75	96.99	128.52	8.04	0	0	0	0	0	0	0	0	0	0	0	0	0	0	0	0	0	0	0	0	0	0	0	0	0	0	0	0	0	0	0	0	0	0	0	0	0	0	0
287	157064	112.76	96.99	128.53	8.05	0	0	0	0	0	0	0	0	0	0	0	0	0	0	0	0	0	0	0	0	0	0	0	0	0	0	0	0	0	0	0	0	0	0	0	0	0	0	0
288	157611	112.76	96.98	128.54	8.05	0	0	0	0	0	0	0	0	0	0	0	0	0	0	0	0	0	0	0	0	0	0	0	0	0	0	0	0	0	0	0	0	0	0	0	0	0	0	0
289	158158	112.76	96.98	128.55	8.06	0	0	0	0	0	0	0	0	0	0	0	0	0	0	0	0	0	0	0	0	0	0	0	0	0	0	0	0	0	0	0	0	0	0	0	0	0	0	0
290	158706	112.77	96.97	128.56	8.06	0	0	0	0	0	0	0	0	0	0	0	0	0	0	0	0	0	0	0	0	0	0	0	0	0	0	0	0	0	0	0	0	0	0	0	0	0	0	0
291	159253	112.77	96.96	128.58	8.06	0	0	0	0	0	0	0	0	0	0	0	0	0	0	0	0	0	0	0	0	0	0	0	0	0	0	0	0	0	0	0	0	0	0	0	0	0	0	0
292	159800	112.77	96.96	128.59	8.07	0	0	0	0	0	0	0	0	0	0	0	0	0	0	0	0	0	0	0	0	0	0	0	0	0	0	0	0	0	0	0	0	0	0	0	0	0	0	0
293	160347	112.78	96.95	128.6	8.07	0	0	0	0	0	0	0	0	0	0	0	0	0	0	0	0	0	0	0	0	0	0	0	0	0	0	0	0	0	0	0	0	0	0	0	0	0	0	0
294	160895	112.78	96.95	128.61	8.08	0	0	0	0	0	0	0	0	0	0	0	0	0	0	0	0	0	0	0	0	0	0	0	0	0	0	0	0	0	0	0	0	0	0	0	0	0	0	0
295	161442	112.78	96.94	128.62	8.08	0	0	0	0	0	0	0	0	0	0	0	0	0	0	0	0	0	0	0	0	0	0	0	0	0	0	0	0	0	0	0	0	0	0	0	0	0	0	0
296	161989	112.78	96.94	128.63	8.08	0	0	0	0	0	0	0	0	0	0	0	0	0	0	0	0	0	0	0	0	0	0	0	0	0	0	0	0	0	0	0	0	0	0	0	0	0	0	0
297	162536	112.79	96.94	128.64	8.09	0	0	0	0	0	0	0	0	0	0	0	0	0	0	0	0	0	0	0	0	0	0	0	0	0	0	0	0	0	0	0	0	0	0	0	0	0	0	0
298	163084	112.79	96.93	128.65	8.09	0	0	0	0	0	0	0	0	0	0	0	0	0	0	0	0	0	0	0	0	0	0	0	0	0	0	0	0	0	0	0	0	0	0	0	0	0	0	0
299	163631	112.79	96.93	128.66	8.09	0	0	0	0	0	0	0	0	0	0	0	0	0	0	0	0	0	0	0	0	0	0	0	0	0	0	0	0	0	0	0	0	0	0	0	0	0	0	0
300	164178	112.79	96.92	128.67	8.1	0	0	0	0	0	0	0	0	0	0	0	0	0	0	0	0	0	0	0	0	0	0	0	0	0	0	0	0	0	0	0	0	0	0	0	0	0	0	0
301	164726	112.8	96.92	128.67	8.1	0	0	0	0	0	0	0	0	0	0	0	0	0	0	0	0	0	0	0	0	0	0	0	0	0	0	0	0	0	0	0	0	0	0	0	0	0	0	0
302	165273	112.8	96.91	128.68	8.1	0	0	0	0	0	0	0	0	0	0	0	0	0	0	0	0	0	0	0	0	0	0	0	0	0	0	0	0	0	0	0	0	0	0	0	0	0	0	0
303	165820	112.8	96.91	128.69	8.11	0	0	0	0	0	0	0	0	0	0	0	0	0	0	0	0	0	0	0	0	0	0	0	0	0	0	0	0	0	0	0	0	0	0	0	0	0	0	0
304	166367	112.8	96.9	128.7	8.11	0	0	0	0	0	0	0	0	0	0	0	0	0	0	0	0	0	0	0	0	0	0	0	0	0	0	0	0	0	0	0	0	0	0	0	0	0	0	0
305	166915	112.8	96.9	128.71	8.11	0	0	0	0	0	0	0	0	0	0	0	0	0	0	0	0	0	0	0	0	0	0	0	0	0	0	0	0	0	0	0	0	0	0	0	0	0	0	0
306	167462	112.81	96.9	128.72	8.12	0	0	0	0	0	0	0	0	0	0	0	0	0	0	0	0	0	0	0	0	0	0	0	0	0	0	0	0	0	0	0	0	0	0	0	0	0	0	0
307	168009	112.81	96.89	128.73	8.12	0	0	0	0	0	0	0	0	0	0	0	0	0	0	0	0	0	0	0	0	0	0	0	0	0	0	0	0	0	0	0	0	0	0	0	0	0	0	0
308	168556	112.81	96.89	128.73	8.12	0	0	0	0	0	0	0	0	0	0	0	0	0	0	0	0	0	0	0	0	0	0	0	0	0	0	0	0	0	0	0	0	0	0	0	0	0	0	0
309	169104	112.81	96.88	128.74	8.13	0	0	0	0	0	0	0	0	0	0	0	0	0	0	0	0	0	0	0	0	0	0	0	0	0	0	0	0	0	0	0	0	0	0	0	0	0	0	0
310	169651	112.81	96.88	128.75	8.13	0	0	0	0	0	0	0	0	0	0	0	0	0	0	0	0	0	0	0	0	0	0	0	0	0	0	0	0	0	0	0	0	0	0	0	0	0	0	0
311	170198	112.82	96.88	128.76	8.13	0	0	0	0	0	0	0	0	0	0	0	0	0	0	0	0	0	0	0	0	0	0	0	0	0	0	0	0	0	0	0	0	0	0	0	0	0	0	0
312	170745	112.82	96.87	128.77	8.14	0	0	0	0	0	0	0	0	0	0	0	0	0	0	0	0	0	0	0	0	0	0	0	0	0	0	0	0	0	0	0	0	0	0	0	0	0	0	0
313	171293	112.82	96.87	128.77	8.14	0	0	0	0	0	0	0	0	0	0	0	0	0	0	0	0	0	0	0	0	0	0	0	0	0	0	0	0	0	0	0	0	0	0	0	0	0	0	0
314	171840	112.82	96.87	128.78	8.14	0	0	0	0	0	0	0	0	0	0	0	0	0	0	0	0	0	0	0	0	0	0	0	0	0	0	0	0	0	0	0	0	0	0	0	0	0	0	0
315	172387	112.82	96.86	128.79	8.14	0	0	0	0	0	0	0	0	0	0	0	0	0	0	0	0	0	0	0	0	0	0	0	0	0	0	0	0	0	0	0	0	0	0	0	0	0	0	0
316	172934	112.83	96.86	128.79	8.15	0	0	0	0	0	0	0	0	0	0	0	0	0	0	0	0	0	0	0	0	0	0	0	0	0	0	0	0	0	0	0	0	0	0	0	0	0	0	0
317	173482	112.83	96.85	128.8	8.15	0	0	0	0	0	0	0	0	0	0	0	0	0	0	0	0	0	0	0	0	0	0	0	0	0	0	0	0	0	0	0	0	0	0	0	0	0	0	0
318	174029	112.83	96.85	128.81	8.15	0	0	0	0	0	0	0	0	0	0	0	0	0	0	0	0	0	0	0	0	0	0	0	0	0	0	0	0	0	0	0	0	0	0	0	0	0	0	0
319	174576	112.83	96.85	128.81	8.15	0	0	0	0	0	0	0	0	0	0	0	0	0	0	0	0	0	0	0	0	0	0	0	0	0	0	0	0	0	0	0	0	0	0	0	0	0	0	0
320	175123	112.83	96.84	128.82	8.16	0	0	0	0	0	0	0	0	0	0	0	0	0	0	0	0	0	0	0	0	0	0	0	0	0	0	0	0	0	0	0	0	0	0	0	0	0	0	0
321	175671	112.83	96.84	128.83	8.16	0	0	0	0	0	0	0	0	0	0	0	0	0	0	0	0	0	0	0	0	0	0	0	0	0	0	0	0	0	0	0	0	0	0	0	0	0	0	0
322	176218	112.84	96.84	128.83	8.16	0	0	0	0	0	0	0	0	0	0	0	0	0	0	0	0	0	0	0	0	0	0	0	0	0	0	0	0	0	0	0	0	0	0	0	0	0	0	0
323	176765	112.84	96.83	128.84	8.16	0	0	0	0	0	0	0	0	0	0	0	0	0	0	0	0	0	0	0	0	0	0	0	0	0	0	0	0	0	0	0	0	0	0	0	0	0	0	0
324	177313	112.84	96.83	128.84	8.17	0	0	0	0	0	0	0	0	0	0	0	0	0	0	0	0	0	0	0	0	0	0	0	0	0	0	0	0	0	0	0	0	0	0	0	0	0	0	0
325	177860	112.84	96.83	128.85	8.17	0	0	0	0	0	0	0	0	0	0	0	0	0	0	0	0	0	0	0	0	0	0	0	0	0	0	0	0	0	0	0	0	0	0	0	0	0	0	0
326	178407	112.84	96.83	128.86	8.17	0	0	0	0	0	0	0	0	0	0	0	0	0	0	0	0	0	0	0	0	0	0	0	0	0	0	0	0	0	0	0	0	0	0	0	0	0	0	0
327	178954	112.84	96.82	128.86	8.17	0	0	0	0	0	0	0	0	0	0	0	0	0	0	0	0	0	0	0	0	0	0	0	0	0	0	0	0	0	0	0	0	0	0	0	0	0	0	0
328	179502	112.84	96.82	128.87	8.18	0	0	0	0	0	0	0	0	0	0	0	0	0	0	0	0	0	0	0	0	0	0	0	0	0	0	0	0	0	0	0	0	0	0	0	0	0	0	0
329	180049	112.85	96.82	128.87	8.18	0	0	0	0	0	0	0	0	0	0	0	0	0	0	0	0	0	0	0	0	0	0	0	0	0	0	0	0	0	0	0	0	0	0	0	0	0	0	0
330	180596	112.85	96.81	128.88	8.18	0	0	0	0	0	0	0	0	0	0	0	0	0	0	0	0	0	0	0	0	0	0	0	0	0	0	0	0	0	0	0	0	0	0	0	0	0	0	0
331	181143	112.85	96.81	128.88	8.18	0	0	0	0	0	0	0	0	0	0	0	0	0	0	0	0	0	0	0	0	0	0	0	0	0	0	0	0	0	0	0	0	0	0	0	0	0	0	0
332	181691	112.85	96.81	128.89	8.18	0	0	0	0	0	0	0	0	0	0	0	0	0	0	0	0	0	0	0	0	0	0	0	0	0	0	0	0	0	0	0	0	0	0	0	0	0	0	0
333	182238	112.85	96.81	128.89	8.19	0	0	0	0	0	0	0	0	0	0	0	0	0	0	0	0	0	0	0	0	0	0	0	0	0	0	0	0	0	0	0	0	0	0	0	0	0	0	0
334	182785	112.85	96.8	128.9	8.19	0	0	0	0	0	0	0	0	0	0	0	0	0	0	0	0	0	0	0	0	0	0	0	0	0	0	0	0	0	0	0	0	0	0	0	0	0	0	0
335	183332	112.85	96.8	128.9	8.19	0	0	0	0	0	0	0	0	0	0	0	0	0	0	0	0	0	0	0	0	0	0	0	0	0	0	0	0	0	0	0	0	0	0	0	0	0	0	0
336	183880	112.85	96.8	128.91	8.19	0	0	0	0	0	0	0	0	0	0	0	0	0	0	0	0	0	0	0	0	0	0	0	0	0	0	0	0	0	0	0	0	0	0	0	0	0	0	0
337	184427	112.85	96.8	128.91	8.19	0	0	0	0	0	0	0	0	0	0	0	0	0	0	0	0	0	0	0	0	0	0	0	0	0	0	0	0	0	0	0	0	0	0	0	0	0	0	0
338	184974	112.86	96.79	128.92	8.2	0	0	0	0	0	0	0	0	0	0	0	0	0	0	0	0	0	0	0	0	0	0	0	0	0	0	0	0	0	0	0	0	0	0	0	0	0	0	0
339	185521	112.86	96.79	128.92	8.2	0	0	0	0	0	0	0	0	0	0	0	0	0	0	0	0	0	0	0	0	0	0	0	0	0	0	0	0	0	0	0	0	0	0	0	0	0	0	0
340	186069	112.86	96.79	128.93	8.2	0	0	0	0	0	0	0	0	0	0	0	0	0	0	0	0	0	0	0	0	0	0	0	0	0	0	0	0	0	0	0	0	0	0	0	0	0	0	0
341	186616	112.86	96.79	128.93	8.2	0	0	0	0	0	0	0	0	0	0	0	0	0	0	0	0	0	0	0	0	0	0	0	0	0	0	0	0	0	0	0	0	0	0	0	0	0	0	0
342	187163	112.86	96.78	128.94	8.2	0	0	0	0	0	0	0	0	0	0	0	0	0	0	0	0	0	0	0	0	0	0	0	0	0	0	0	0	0	0	0	0	0	0	0	0	0	0	0
343	187710	112.86	96.78	128.94	8.2	0	0	0	0	0	0	0	0	0	0	0	0	0	0	0	0	0	0	0	0	0	0	0	0	0	0	0	0	0	0	0	0	0	0	0	0	0	0	0
344	188258	112.86	96.78	128.94	8.21	0	0	0	0	0	0	0	0	0	0	0	0	0	0	0	0	0	0	0	0	0	0	0	0	0	0	0	0	0	0	0	0	0	0	0	0	0	0	0
345	188805	112.86	96.78	128.95	8.21	0	0	0	0	0	0	0	0	0	0	0	0	0	0	0	0	0	0	0	0	0	0	0	0	0	0	0	0	0	0	0	0	0	0	0	0	0	0	0
346	189352	112.86	96.77	128.95	8.21	0	0	0	0	0	0	0	0	0	0	0	0	0	0	0	0	0	0	0	0	0	0	0	0	0	0	0	0	0	0	0	0	0	0	0	0	0	0	0
347	189900	112.86	96.77	128.96	8.21	0	0	0	0	0	0	0	0	0	0	0	0	0	0	0	0	0	0	0	0	0	0	0	0	0	0	0	0	0	0	0	0	0	0	0	0	0	0	0
348	190447	112.87	96.77	128.96	8.21	0	0	0	0	0	0	0	0	0	0	0	0	0	0	0	0	0	0	0	0	0	0	0	0	0	0	0	0	0	0	0	0	0	0	0	0	0	0	0
349	190994	112.87	96.77	128.96	8.21	0	0	0	0	0	0	0	0	0	0	0	0	0	0	0	0	0	0	0	0	0	0	0	0	0	0	0	0	0	0	0	0	0	0	0	0	0	0	0
350	191541	112.87	96.77	128.97	8.21	0	0	0	0	0	0	0	0	0	0	0	0	0	0	0	0	0	0	0	0	0	0	0	0	0	0	0	0	0	0	0	0	0	0	0	0	0	0	0
351	192089	112.87	96.76	128.97	8.22	0	0	0	0	0	0	0	0	0	0	0	0	0	0	0	0	0	0	0	0	0	0	0	0	0	0	0	0	0	0	0	0	0	0	0	0	0	0	0
352	192636	112.87	96.76	128.97	8.22	0	0	0	0	0	0	0	0	0	0	0	0	0	0	0	0	0	0	0	0	0	0	0	0	0	0	0	0	0	0	0	0	0	0	0	0	0	0	0
353	193183	112.87	96.76	128.98	8.22	0	0	0	0	0	0	0	0	0	0	0	0	0	0	0	0	0	0	0	0	0	0	0	0	0	0	0	0	0	0	0	0	0	0	0	0	0	0	0
354	193730	112.87	96.76	128.98	8.22	0	0	0	0	0	0	0	0	0	0	0	0	0	0	0	0	0	0	0	0	0	0	0	0	0	0	0	0	0	0	0	0	0	0	0	0	0	0	0
355	194278	112.87	96.76	128.99	8.22	0	0	0	0	0	0	0	0	0	0	0	0	0	0	0	0	0	0	0	0	0	0	0	0	0	0	0	0	0	0	0	0	0	0	0	0	0	0	0
356	194825	112.87	96.75	128.99	8.22	0	0	0	0	0	0	0	0	0	0	0	0	0	0	0	0	0	0	0	0	0	0	0	0	0	0	0	0	0	0	0	0	0	0	0	0	0	0	0
357	195372	112.87	96.75	128.99	8.22	0	0	0	0	0	0	0	0	0	0	0	0	0	0	0	0	0	0	0	0	0	0	0	0	0	0	0	0	0	0	0	0	0	0	0	0	0	0	0
358	195919	112.87	96.75	128.99	8.23	0	0	0	0	0	0	0	0	0	0	0	0	0	0	0	0	0	0	0	0	0	0	0	0	0	0	0	0	0	0	0	0	0	0	0	0	0	0	0
359	196467	112.87	96.75	129	8.23	0	0	0	0	0	0	0	0	0	0	0	0	0	0	0	0	0	0	0	0	0	0	0	0	0	0	0	0	0	0	0	0	0	0	0	0	0	0	0
360	197014	112.87	96.75	129	8.23	0	0	0	0	0	0	0	0	0	0	0	0	0	0	0	0	0	0	0	0	0	0	0	0	0	0	0	0	0	0	0	0	0	0	0	0	0	0	0
361	197561	112.87	96.75	129	8.23	0	0	0	0	0	0	0	0	0	0	0	0	0	0	0	0	0	0	0	0	0	0	0	0	0	0	0	0	0	0	0	0	0	0	0	0	0	0	0
362	198108	112.88	96.74	129.01	8.23	0	0	0	0	0	0	0	0	0	0	0	0	0	0	0	0	0	0	0	0	0	0	0	0	0	0	0	0	0	0	0	0	0	0	0	0	0	0	0
363	198656	112.88	96.74	129.01	8.23	0	0	0	0	0	0	0	0	0	0	0	0	0	0	0	0	0	0	0	0	0	0	0	0	0	0	0	0	0	0	0	0	0	0	0	0	0	0	0
364	199203	112.88	96.74	129.01	8.23	0	0	0	0	0	0	0	0	0	0	0	0	0	0	0	0	0	0	0	0	0	0	0	0	0	0	0	0	0	0	0	0	0	0	0	0	0	0	0
365	199750	112.88	96.74	129.02	8.23	0	0	0	0	0	0	0	0	0	0	0	0	0	0	0	0	0	0	0	0	0	0	0	0	0	0	0	0	0	0	0	0	0	0	0	0	0	0	0
366	200297	112.88	96.74	129.02	8.23	0	0	0	0	0	0	0	0	0	0	0	0	0	0	0	0	0	0	0	0	0	0	0	0	0	0	0	0	0	0	0	0	0	0	0	0	0	0	0
367	200845	112.88	96.74	129.02	8.24	0	0	0	0	0	0	0	0	0	0	0	0	0	0	0	0	0	0	0	0	0	0	0	0	0	0	0	0	0	0	0	0	0	0	0	0	0	0	0
368	201392	112.88	96.73	129.02	8.24	0	0	0	0	0	0	0	0	0	0	0	0	0	0	0	0	0	0	0	0	0	0	0	0	0	0	0	0	0	0	0	0	0	0	0	0	0	0	0
369	201939	112.88	96.73	129.03	8.24	0	0	0	0	0	0	0	0	0	0	0	0	0	0	0	0	0	0	0	0	0	0	0	0	0	0	0	0	0	0	0	0	0	0	0	0	0	0	0
370	202487	112.88	96.73	129.03	8.24	0	0	0	0	0	0	0	0	0	0	0	0	0	0	0	0	0	0	0	0	0	0	0	0	0	0	0	0	0	0	0	0	0	0	0	0	0	0	0
371	203034	112.88	96.73	129.03	8.24	0	0	0	0	0	0	0	0	0	0	0	0	0	0	0	0	0	0	0	0	0	0	0	0	0	0	0	0	0	0	0	0	0	0	0	0	0	0	0
372	203581	112.88	96.73	129.03	8.24	0	0	0	0	0	0	0	0	0	0	0	0	0	0	0	0	0	0	0	0	0	0	0	0	0	0	0	0	0	0	0	0	0	0	0	0	0	0	0
373	204128	112.88	96.73	129.04	8.24	0	0	0	0	0	0	0	0	0	0	0	0	0	0	0	0	0	0	0	0	0	0	0	0	0	0	0	0	0	0	0	0	0	0	0	0	0	0	0
374	204676	112.88	96.73	129.04	8.24	0	0	0	0	0	0	0	0	0	0	0	0	0	0	0	0	0	0	0	0	0	0	0	0	0	0	0	0	0	0	0	0	0	0	0	0	0	0	0
375	205223	112.88	96.72	129.04	8.24	0	0	0	0	0	0	0	0	0	0	0	0	0	0	0	0	0	0	0	0	0	0	0	0	0	0	0	0	0	0	0	0	0	0	0	0	0	0	0
376	205770	112.88	96.72	129.04	8.24	0	0	0	0	0	0	0	0	0	0	0	0	0	0	0	0	0	0	0	0	0	0	0	0	0	0	0	0	0	0	0	0	0	0	0	0	0	0	0
377	206317	112.88	96.72	129.05	8.25	0	0	0	0	0	0	0	0	0	0	0	0	0	0	0	0	0	0	0	0	0	0	0	0	0	0	0	0	0	0	0	0	0	0	0	0	0	0	0
378	206865	112.88	96.72	129.05	8.25	0	0	0	0	0	0	0	0	0	0	0	0	0	0	0	0	0	0	0	0	0	0	0	0	0	0	0	0	0	0	0	0	0	0	0	0	0	0	0
379	207412	112.88	96.72	129.05	8.25	0	0	0	0	0	0	0	0	0	0	0	0	0	0	0	0	0	0	0	0	0	0	0	0	0	0	0	0	0	0	0	0	0	0	0	0	0	0	0
380	207959	112.89	96.72	129.05	8.25	0	0	0	0	0	0	0	0	0	0	0	0	0	0	0	0	0	0	0	0	0	0	0	0	0	0	0	0	0	0	0	0	0	0	0	0	0	0	0
381	208506	112.89	96.72	129.05	8.25	0	0	0	0	0	0	0	0	0	0	0	0	0	0	0	0	0	0	0	0	0	0	0	0	0	0	0	0	0	0	0	0	0	0	0	0	0	0	0
382	209054	112.89	96.72	129.06	8.25	0	0	0	0	0	0	0	0	0	0	0	0	0	0	0	0	0	0	0	0	0	0	0	0	0	0	0	0	0	0	0	0	0	0	0	0	0	0	0
383	209601	112.89	96.71	129.06	8.25	0	0	0	0	0	0	0	0	0	0	0	0	0	0	0	0	0	0	0	0	0	0	0	0	0	0	0	0	0	0	0	0	0	0	0	0	0	0	0
384	210148	112.89	96.71	129.06	8.25	0	0	0	0	0	0	0	0	0	0	0	0	0	0	0	0	0	0	0	0	0	0	0	0	0	0	0	0	0	0	0	0	0	0	0	0	0	0	0
385	210695	112.89	96.71	129.06	8.25	0	0	0	0	0	0	0	0	0	0	0	0	0	0	0	0	0	0	0	0	0	0	0	0	0	0	0	0	0	0	0	0	0	0	0	0	0	0	0
386	211243	112.89	96.71	129.06	8.25	0	0	0	0	0	0	0	0	0	0	0	0	0	0	0	0	0	0	0	0	0	0	0	0	0	0	0	0	0	0	0	0	0	0	0	0	0	0	0
387	211790	112.89	96.71	129.07	8.25	0	0	0	0	0	0	0	0	0	0	0	0	0	0	0	0	0	0	0	0	0	0	0	0	0	0	0	0	0	0	0	0	0	0	0	0	0	0	0
388	212337	112.89	96.71	129.07	8.25	0	0	0	0	0	0	0	0	0	0	0	0	0	0	0	0	0	0	0	0	0	0	0	0	0	0	0	0	0	0	0	0	0	0	0	0	0	0	0
389	212884	112.89	96.71	129.07	8.26	0	0	0	0	0	0	0	0	0	0	0	0	0	0	0	0	0	0	0	0	0	0	0	0	0	0	0	0	0	0	0	0	0	0	0	0	0	0	0
390	213432	112.89	96.71	129.07	8.26	0	0	0	0	0	0	0	0	0	0	0	0	0	0	0	0	0	0	0	0	0	0	0	0	0	0	0	0	0	0	0	0	0	0	0	0	0	0	0
391	213979	112.89	96.71	129.07	8.26	0	0	0	0	0	0	0	0	0	0	0	0	0	0	0	0	0	0	0	0	0	0	0	0	0	0	0	0	0	0	0	0	0	0	0	0	0	0	0
392	214526	112.89	96.71	129.07	8.26	0	0	0	0	0	0	0	0	0	0	0	0	0	0	0	0	0	0	0	0	0	0	0	0	0	0	0	0	0	0	0	0	0	0	0	0	0	0	0
393	215074	112.89	96.7	129.08	8.26	0	0	0	0	0	0	0	0	0	0	0	0	0	0	0	0	0	0	0	0	0	0	0	0	0	0	0	0	0	0	0	0	0	0	0	0	0	0	0
394	215621	112.89	96.7	129.08	8.26	0	0	0	0	0	0	0	0	0	0	0	0	0	0	0	0	0	0	0	0	0	0	0	0	0	0	0	0	0	0	0	0	0	0	0	0	0	0	0
395	216168	112.89	96.7	129.08	8.26	0	0	0	0	0	0	0	0	0	0	0	0	0	0	0	0	0	0	0	0	0	0	0	0	0	0	0	0	0	0	0	0	0	0	0	0	0	0	0
396	216715	112.89	96.7	129.08	8.26	0	0	0	0	0	0	0	0	0	0	0	0	0	0	0	0	0	0	0	0	0	0	0	0	0	0	0	0	0	0	0	0	0	0	0	0	0	0	0
397	217263	112.89	96.7	129.08	8.26	0	0	0	0	0	0	0	0	0	0	0	0	0	0	0	0	0	0	0	0	0	0	0	0	0	0	0	0	0	0	0	0	0	0	0	0	0	0	0
398	217810	112.89	96.7	129.08	8.26	0	0	0	0	0	0	0	0	0	0	0	0	0	0	0	0	0	0	0	0	0	0	0	0	0	0	0	0	0	0	0	0	0	0	0	0	0	0	0
399	218357	112.89	96.7	129.09	8.26	0	0	0	0	0	0	0	0	0	0	0	0	0	0	0	0	0	0	0	0	0	0	0	0	0	0	0	0	0	0	0	0	0	0	0	0	0	0	0
400	218904	112.89	96.7	129.09	8.26	0	0	0	0	0	0	0	0	0	0	0	0	0	0	0	0	0	0	0	0	0	0	0	0	0	0	0	0	0	0	0	0	0	0	0	0	0	0	0
401	219452	112.89	96.7	129.09	8.26	0	0	0	0	0	0	0	0	0	0	0	0	0	0	0	0	0	0	0	0	0	0	0	0	0	0	0	0	0	0	0	0	0	0	0	0	0	0	0
402	219999	112.89	96.7	129.09	8.26	0	0	0	0	0	0	0	0	0	0	0	0	0	0	0	0	0	0	0	0	0	0	0	0	0	0	0	0	0	0	0	0	0	0	0	0	0	0	0
403	220546	112.89	96.7	129.09	8.26	0	0	0	0	0	0	0	0	0	0	0	0	0	0	0	0	0	0	0	0	0	0	0	0	0	0	0	0	0	0	0	0	0	0	0	0	0	0	0
404	221093	112.89	96.69	129.09	8.26	0	0	0	0	0	0	0	0	0	0	0	0	0	0	0	0	0	0	0	0	0	0	0	0	0	0	0	0	0	0	0	0	0	0	0	0	0	0	0
405	221641	112.89	96.69	129.09	8.27	0	0	0	0	0	0	0	0	0	0	0	0	0	0	0	0	0	0	0	0	0	0	0	0	0	0	0	0	0	0	0	0	0	0	0	0	0	0	0
406	222188	112.89	96.69	129.09	8.27	0	0	0	0	0	0	0	0	0	0	0	0	0	0	0	0	0	0	0	0	0	0	0	0	0	0	0	0	0	0	0	0	0	0	0	0	0	0	0
407	222735	112.89	96.69	129.1	8.27	0	0	0	0	0	0	0	0	0	0	0	0	0	0	0	0	0	0	0	0	0	0	0	0	0	0	0	0	0	0	0	0	0	0	0	0	0	0	0
408	223282	112.89	96.69	129.1	8.27	0	0	0	0	0	0	0	0	0	0	0	0	0	0	0	0	0	0	0	0	0	0	0	0	0	0	0	0	0	0	0	0	0	0	0	0	0	0	0
409	223830	112.89	96.69	129.1	8.27	0	0	0	0	0	0	0	0	0	0	0	0	0	0	0	0	0	0	0	0	0	0	0	0	0	0	0	0	0	0	0	0	0	0	0	0	0	0	0
410	224377	112.89	96.69	129.1	8.27	0	0	0	0	0	0	0	0	0	0	0	0	0	0	0	0	0	0	0	0	0	0	0	0	0	0	0	0	0	0	0	0	0	0	0	0	0	0	0
411	224924	112.9	96.69	129.1	8.27	0	0	0	0	0	0	0	0	0	0	0	0	0	0	0	0	0	0	0	0	0	0	0	0	0	0	0	0	0	0	0	0	0	0	0	0	0	0	0
412	225471	112.9	96.69	129.1	8.27	0	0	0	0	0	0	0	0	0	0	0	0	0	0	0	0	0	0	0	0	0	0	0	0	0	0	0	0	0	0	0	0	0	0	0	0	0	0	0
413	226019	112.9	96.69	129.1	8.27	0	0	0	0	0	0	0	0	0	0	0	0	0	0	0	0	0	0	0	0	0	0	0	0	0	0	0	0	0	0	0	0	0	0	0	0	0	0	0
414	226566	112.9	96.69	129.1	8.27	0	0	0	0	0	0	0	0	0	0	0	0	0	0	0	0	0	0	0	0	0	0	0	0	0	0	0	0	0	0	0	0	0	0	0	0	0	0	0
415	227113	112.9	96.69	129.11	8.27	0	0	0	0	0	0	0	0	0	0	0	0	0	0	0	0	0	0	0	0	0	0	0	0	0	0	0	0	0	0	0	0	0	0	0	0	0	0	0
416	227661	112.9	96.69	129.11	8.27	0	0	0	0	0	0	0	0	0	0	0	0	0	0	0	0	0	0	0	0	0	0	0	0	0	0	0	0	0	0	0	0	0	0	0	0	0	0	0
417	228208	112.9	96.69	129.11	8.27	0	0	0	0	0	0	0	0	0	0	0	0	0	0	0	0	0	0	0	0	0	0	0	0	0	0	0	0	0	0	0	0	0	0	0	0	0	0	0
418	228755	112.9	96.68	129.11	8.27	0	0	0	0	0	0	0	0	0	0	0	0	0	0	0	0	0	0	0	0	0	0	0	0	0	0	0	0	0	0	0	0	0	0	0	0	0	0	0
419	229302	112.9	96.68	129.11	8.27	0	0	0	0	0	0	0	0	0	0	0	0	0	0	0	0	0	0	0	0	0	0	0	0	0	0	0	0	0	0	0	0	0	0	0	0	0	0	0
420	229850	112.9	96.68	129.11	8.27	0	0	0	0	0	0	0	0	0	0	0	0	0	0	0	0	0	0	0	0	0	0	0	0	0	0	0	0	0	0	0	0	0	0	0	0	0	0	0
421	230397	112.9	96.68	129.11	8.27	0	0	0	0	0	0	0	0	0	0	0	0	0	0	0	0	0	0	0	0	0	0	0	0	0	0	0	0	0	0	0	0	0	0	0	0	0	0	0
422	230944	112.9	96.68	129.11	8.27	0	0	0	0	0	0	0	0	0	0	0	0	0	0	0	0	0	0	0	0	0	0	0	0	0	0	0	0	0	0	0	0	0	0	0	0	0	0	0
423	231491	112.9	96.68	129.11	8.27	0	0	0	0	0	0	0	0	0	0	0	0	0	0	0	0	0	0	0	0	0	0	0	0	0	0	0	0	0	0	0	0	0	0	0	0	0	0	0
424	232039	112.9	96.68	129.11	8.27	0	0	0	0	0	0	0	0	0	0	0	0	0	0	0	0	0	0	0	0	0	0	0	0	0	0	0	0	0	0	0	0	0	0	0	0	0	0	0
425	232586	112.9	96.68	129.12	8.27	0	0	0	0	0	0	0	0	0	0	0	0	0	0	0	0	0	0	0	0	0	0	0	0	0	0	0	0	0	0	0	0	0	0	0	0	0	0	0
426	233133	112.9	96.68	129.12	8.27	0	0	0	0	0	0	0	0	0	0	0	0	0	0	0	0	0	0	0	0	0	0	0	0	0	0	0	0	0	0	0	0	0	0	0	0	0	0	0
427	233680	112.9	96.68	129.12	8.28	0	0	0	0	0	0	0	0	0	0	0	0	0	0	0	0	0	0	0	0	0	0	0	0	0	0	0	0	0	0	0	0	0	0	0	0	0	0	0
428	234228	112.9	96.68	129.12	8.28	0	0	0	0	0	0	0	0	0	0	0	0	0	0	0	0	0	0	0	0	0	0	0	0	0	0	0	0	0	0	0	0	0	0	0	0	0	0	0
429	234775	112.9	96.68	129.12	8.28	0	0	0	0	0	0	0	0	0	0	0	0	0	0	0	0	0	0	0	0	0	0	0	0	0	0	0	0	0	0	0	0	0	0	0	0	0	0	0
430	235322	112.9	96.68	129.12	8.28	0	0	0	0	0	0	0	0	0	0	0	0	0	0	0	0	0	0	0	0	0	0	0	0	0	0	0	0	0	0	0	0	0	0	0	0	0	0	0
431	235869	112.9	96.68	129.12	8.28	0	0	0	0	0	0	0	0	0	0	0	0	0	0	0	0	0	0	0	0	0	0	0	0	0	0	0	0	0	0	0	0	0	0	0	0	0	0	0
432	236417	112.9	96.68	129.12	8.28	0	0	0	0	0	0	0	0	0	0	0	0	0	0	0	0	0	0	0	0	0	0	0	0	0	0	0	0	0	0	0	0	0	0	0	0	0	0	0
433	236964	112.9	96.68	129.12	8.28	0	0	0	0	0	0	0	0	0	0	0	0	0	0	0	0	0	0	0	0	0	0	0	0	0	0	0	0	0	0	0	0	0	0	0	0	0	0	0
434	237511	112.9	96.68	129.12	8.28	0	0	0	0	0	0	0	0	0	0	0	0	0	0	0	0	0	0	0	0	0	0	0	0	0	0	0	0	0	0	0	0	0	0	0	0	0	0	0
435	238058	112.9	96.68	129.12	8.28	0	0	0	0	0	0	0	0	0	0	0	0	0	0	0	0	0	0	0	0	0	0	0	0	0	0	0	0	0	0	0	0	0	0	0	0	0	0	0
436	238606	112.9	96.67	129.12	8.28	0	0	0	0	0	0	0	0	0	0	0	0	0	0	0	0	0	0	0	0	0	0	0	0	0	0	0	0	0	0	0	0	0	0	0	0	0	0	0
437	239153	112.9	96.67	129.13	8.28	0	0	0	0	0	0	0	0	0	0	0	0	0	0	0	0	0	0	0	0	0	0	0	0	0	0	0	0	0	0	0	0	0	0	0	0	0	0	0
438	239700	112.9	96.67	129.13	8.28	0	0	0	0	0	0	0	0	0	0	0	0	0	0	0	0	0	0	0	0	0	0	0	0	0	0	0	0	0	0	0	0	0	0	0	0	0	0	0
439	240248	112.9	96.67	129.13	8.28	0	0	0	0	0	0	0	0	0	0	0	0	0	0	0	0	0	0	0	0	0	0	0	0	0	0	0	0	0	0	0	0	0	0	0	0	0	0	0
440	240795	112.9	96.67	129.13	8.28	0	0	0	0	0	0	0	0	0	0	0	0	0	0	0	0	0	0	0	0	0	0	0	0	0	0	0	0	0	0	0	0	0	0	0	0	0	0	0
441	241342	112.9	96.67	129.13	8.28	0	0	0	0	0	0	0	0	0	0	0	0	0	0	0	0	0	0	0	0	0	0	0	0	0	0	0	0	0	0	0	0	0	0	0	0	0	0	0
442	241889	112.9	96.67	129.13	8.28	0	0	0	0	0	0	0	0	0	0	0	0	0	0	0	0	0	0	0	0	0	0	0	0	0	0	0	0	0	0	0	0	0	0	0	0	0	0	0
443	242437	112.9	96.67	129.13	8.28	0	0	0	0	0	0	0	0	0	0	0	0	0	0	0	0	0	0	0	0	0	0	0	0	0	0	0	0	0	0	0	0	0	0	0	0	0	0	0
444	242984	112.9	96.67	129.13	8.28	0	0	0	0	0	0	0	0	0	0	0	0	0	0	0	0	0	0	0	0	0	0	0	0	0	0	0	0	0	0	0	0	0	0	0	0	0	0	0
445	243531	112.9	96.67	129.13	8.28	0	0	0	0	0	0	0	0	0	0	0	0	0	0	0	0	0	0	0	0	0	0	0	0	0	0	0	0	0	0	0	0	0	0	0	0	0	0	0
446	244078	112.9	96.67	129.13	8.28	0	0	0	0	0	0	0	0	0	0	0	0	0	0	0	0	0	0	0	0	0	0	0	0	0	0	0	0	0	0	0	0	0	0	0	0	0	0	0
447	244626	112.9	96.67	129.13	8.28	0	0	0	0	0	0	0	0	0	0	0	0	0	0	0	0	0	0	0	0	0	0	0	0	0	0	0	0	0	0	0	0	0	0	0	0	0	0	0
448	245173	112.9	96.67	129.13	8.28	0	0	0	0	0	0	0	0	0	0	0	0	0	0	0	0	0	0	0	0	0	0	0	0	0	0	0	0	0	0	0	0	0	0	0	0	0	0	0
449	245720	112.9	96.67	129.13	8.28	0	0	0	0	0	0	0	0	0	0	0	0	0	0	0	0	0	0	0	0	0	0	0	0	0	0	0	0	0	0	0	0	0	0	0	0	0	0	0
450	246267	112.9	96.67	129.13	8.28	0	0	0	0	0	0	0	0	0	0	0	0	0	0	0	0	0	0	0	0	0	0	0	0	0	0	0	0	0	0	0	0	0	0	0	0	0	0	0
451	246815	112.9	96.67	129.13	8.28	0	0	0	0	0	0	0	0	0	0	0	0	0	0	0	0	0	0	0	0	0	0	0	0	0	0	0	0	0	0	0	0	0	0	0	0	0	0	0
452	247362	112.9	96.67	129.13	8.28	0	0	0	0	0	0	0	0	0	0	0	0	0	0	0	0	0	0	0	0	0	0	0	0	0	0	0	0	0	0	0	0	0	0	0	0	0	0	0
453	247909	112.9	96.67	129.13	8.28	0	0	0	0	0	0	0	0	0	0	0	0	0	0	0	0	0	0	0	0	0	0	0	0	0	0	0	0	0	0	0	0	0	0	0	0	0	0	0
454	248456	112.9	96.67	129.14	8.28	0	0	0	0	0	0	0	0	0	0	0	0	0	0	0	0	0	0	0	0	0	0	0	0	0	0	0	0	0	0	0	0	0	0	0	0	0	0	0
455	249004	112.9	96.67	129.14	8.28	0	0	0	0	0	0	0	0	0	0	0	0	0	0	0	0	0	0	0	0	0	0	0	0	0	0	0	0	0	0	0	0	0	0	0	0	0	0	0
456	249551	112.9	96.67	129.14	8.28	0	0	0	0	0	0	0	0	0	0	0	0	0	0	0	0	0	0	0	0	0	0	0	0	0	0	0	0	0	0	0	0	0	0	0	0	0	0	0
457	250098	112.9	96.67	129.14	8.28	0	0	0	0	0	0	0	0	0	0	0	0	0	0	0	0	0	0	0	0	0	0	0	0	0	0	0	0	0	0	0	0	0	0	0	0	0	0	0
458	250645	112.9	96.67	129.14	8.28	0	0	0	0	0	0	0	0	0	0	0	0	0	0	0	0	0	0	0	0	0	0	0	0	0	0	0	0	0	0	0	0	0	0	0	0	0	0	0
459	251193	112.9	96.67	129.14	8.28	0	0	0	0	0	0	0	0	0	0	0	0	0	0	0	0	0	0	0	0	0	0	0	0	0	0	0	0	0	0	0	0	0	0	0	0	0	0	0
460	251740	112.9	96.67	129.14	8.28	0	0	0	0	0	0	0	0	0	0	0	0	0	0	0	0	0	0	0	0	0	0	0	0	0	0	0	0	0	0	0	0	0	0	0	0	0	0	0
461	252287	112.9	96.67	129.14	8.28	0	0	0	0	0	0	0	0	0	0	0	0	0	0	0	0	0	0	0	0	0	0	0	0	0	0	0	0	0	0	0	0	0	0	0	0	0	0	0
462	252835	112.9	96.67	129.14	8.28	0	0	0	0	0	0	0	0	0	0	0	0	0	0	0	0	0	0	0	0	0	0	0	0	0	0	0	0	0	0	0	0	0	0	0	0	0	0	0
463	253382	112.9	96.66	129.14	8.28	0	0	0	0	0	0	0	0	0	0	0	0	0	0	0	0	0	0	0	0	0	0	0	0	0	0	0	0	0	0	0	0	0	0	0	0	0	0	0
464	253929	112.9	96.66	129.14	8.28	0	0	0	0	0	0	0	0	0	0	0	0	0	0	0	0	0	0	0	0	0	0	0	0	0	0	0	0	0	0	0	0	0	0	0	0	0	0	0
465	254476	112.9	96.66	129.14	8.28	0	0	0	0	0	0	0	0	0	0	0	0	0	0	0	0	0	0	0	0	0	0	0	0	0	0	0	0	0	0	0	0	0	0	0	0	0	0	0
466	255024	112.9	96.66	129.14	8.28	0	0	0	0	0	0	0	0	0	0	0	0	0	0	0	0	0	0	0	0	0	0	0	0	0	0	0	0	0	0	0	0	0	0	0	0	0	0	0
467	255571	112.9	96.66	129.14	8.29	0	0	0	0	0	0	0	0	0	0	0	0	0	0	0	0	0	0	0	0	0	0	0	0	0	0	0	0	0	0	0	0	0	0	0	0	0	0	0
468	256118	112.9	96.66	129.14	8.29	0	0	0	0	0	0	0	0	0	0	0	0	0	0	0	0	0	0	0	0	0	0	0	0	0	0	0	0	0	0	0	0	0	0	0	0	0	0	0
469	256665	112.9	96.66	129.14	8.29	0	0	0	0	0	0	0	0	0	0	0	0	0	0	0	0	0	0	0	0	0	0	0	0	0	0	0	0	0	0	0	0	0	0	0	0	0	0	0
470	257213	112.9	96.66	129.14	8.29	0	0	0	0	0	0	0	0	0	0	0	0	0	0	0	0	0	0	0	0	0	0	0	0	0	0	0	0	0	0	0	0	0	0	0	0	0	0	0
471	257760	112.9	96.66	129.14	8.29	0	0	0	0	0	0	0	0	0	0	0	0	0	0	0	0	0	0	0	0	0	0	0	0	0	0	0	0	0	0	0	0	0	0	0	0	0	0	0
472	258307	112.9	96.66	129.14	8.29	0	0	0	0	0	0	0	0	0	0	0	0	0	0	0	0	0	0	0	0	0	0	0	0	0	0	0	0	0	0	0	0	0	0	0	0	0	0	0
473	258854	112.9	96.66	129.14	8.29	0	0	0	0	0	0	0	0	0	0	0	0	0	0	0	0	0	0	0	0	0	0	0	0	0	0	0	0	0	0	0	0	0	0	0	0	0	0	0
474	259402	112.9	96.66	129.14	8.29	0	0	0	0	0	0	0	0	0	0	0	0	0	0	0	0	0	0	0	0	0	0	0	0	0	0	0	0	0	0	0	0	0	0	0	0	0	0	0
475	259949	112.9	96.66	129.14	8.29	0	0	0	0	0	0	0	0	0	0	0	0	0	0	0	0	0	0	0	0	0	0	0	0	0	0	0	0	0	0	0	0	0	0	0	0	0	0	0
476	260496	112.9	96.66	129.14	8.29	0	0	0	0	0	0	0	0	0	0	0	0	0	0	0	0	0	0	0	0	0	0	0	0	0	0	0	0	0	0	0	0	0	0	0	0	0	0	0
477	261043	112.9	96.66	129.14	8.29	0	0	0	0	0	0	0	0	0	0	0	0	0	0	0	0	0	0	0	0	0	0	0	0	0	0	0	0	0	0	0	0	0	0	0	0	0	0	0
478	261591	112.9	96.66	129.15	8.29	0	0	0	0	0	0	0	0	0	0	0	0	0	0	0	0	0	0	0	0	0	0	0	0	0	0	0	0	0	0	0	0	0	0	0	0	0	0	0
479	262138	112.9	96.66	129.15	8.29	0	0	0	0	0	0	0	0	0	0	0	0	0	0	0	0	0	0	0	0	0	0	0	0	0	0	0	0	0	0	0	0	0	0	0	0	0	0	0
480	262685	112.9	96.66	129.15	8.29	0	0	0	0	0	0	0	0	0	0	0	0	0	0	0	0	0	0	0	0	0	0	0	0	0	0	0	0	0	0	0	0	0	0	0	0	0	0	0
481	263232	112.9	96.66	129.15	8.29	0	0	0	0	0	0	0	0	0	0	0	0	0	0	0	0	0	0	0	0	0	0	0	0	0	0	0	0	0	0	0	0	0	0	0	0	0	0	0
482	263780	112.9	96.66	129.15	8.29	0	0	0	0	0	0	0	0	0	0	0	0	0	0	0	0	0	0	0	0	0	0	0	0	0	0	0	0	0	0	0	0	0	0	0	0	0	0	0
483	264327	112.9	96.66	129.15	8.29	0	0	0	0	0	0	0	0	0	0	0	0	0	0	0	0	0	0	0	0	0	0	0	0	0	0	0	0	0	0	0	0	0	0	0	0	0	0	0
484	264874	112.9	96.66	129.15	8.29	0	0	0	0	0	0	0	0	0	0	0	0	0	0	0	0	0	0	0	0	0	0	0	0	0	0	0	0	0	0	0	0	0	0	0	0	0	0	0
485	265422	112.9	96.66	129.15	8.29	0	0	0	0	0	0	0	0	0	0	0	0	0	0	0	0	0	0	0	0	0	0	0	0	0	0	0	0	0	0	0	0	0	0	0	0	0	0	0
486	265969	112.9	96.66	129.15	8.29	0	0	0	0	0	0	0	0	0	0	0	0	0	0	0	0	0	0	0	0	0	0	0	0	0	0	0	0	0	0	0	0	0	0	0	0	0	0	0
487	266516	112.9	96.66	129.15	8.29	0	0	0	0	0	0	0	0	0	0	0	0	0	0	0	0	0	0	0	0	0	0	0	0	0	0	0	0	0	0	0	0	0	0	0	0	0	0	0
488	267063	112.9	96.66	129.15	8.29	0	0	0	0	0	0	0	0	0	0	0	0	0	0	0	0	0	0	0	0	0	0	0	0	0	0	0	0	0	0	0	0	0	0	0	0	0	0	0
489	267611	112.9	96.66	129.15	8.29	0	0	0	0	0	0	0	0	0	0	0	0	0	0	0	0	0	0	0	0	0	0	0	0	0	0	0	0	0	0	0	0	0	0	0	0	0	0	0
490	268158	112.9	96.66	129.15	8.29	0	0	0	0	0	0	0	0	0	0	0	0	0	0	0	0	0	0	0	0	0	0	0	0	0	0	0	0	0	0	0	0	0	0	0	0	0	0	0
491	268705	112.9	96.66	129.15	8.29	0	0	0	0	0	0	0	0	0	0	0	0	0	0	0	0	0	0	0	0	0	0	0	0	0	0	0	0	0	0	0	0	0	0	0	0	0	0	0
492	269252	112.9	96.66	129.15	8.29	0	0	0	0	0	0	0	0	0	0	0	0	0	0	0	0	0	0	0	0	0	0	0	0	0	0	0	0	0	0	0	0	0	0	0	0	0	0	0
493	269800	112.9	96.66	129.15	8.29	0	0	0	0	0	0	0	0	0	0	0	0	0	0	0	0	0	0	0	0	0	0	0	0	0	0	0	0	0	0	0	0	0	0	0	0	0	0	0
494	270347	112.9	96.66	129.15	8.29	0	0	0	0	0	0	0	0	0	0	0	0	0	0	0	0	0	0	0	0	0	0	0	0	0	0	0	0	0	0	0	0	0	0	0	0	0	0	0
495	270894	112.9	96.66	129.15	8.29	0	0	0	0	0	0	0	0	0	0	0	0	0	0	0	0	0	0	0	0	0	0	0	0	0	0	0	0	0	0	0	0	0	0	0	0	0	0	0
496	271441	112.9	96.66	129.15	8.29	0	0	0	0	0	0	0	0	0	0	0	0	0	0	0	0	0	0	0	0	0	0	0	0	0	0	0	0	0	0	0	0	0	0	0	0	0	0	0
497	271989	112.9	96.66	129.15	8.29	0	0	0	0	0	0	0	0	0	0	0	0	0	0	0	0	0	0	0	0	0	0	0	0	0	0	0	0	0	0	0	0	0	0	0	0	0	0	0
498	272536	112.9	96.66	129.15	8.29	0	0	0	0	0	0	0	0	0	0	0	0	0	0	0	0	0	0	0	0	0	0	0	0	0	0	0	0	0	0	0	0	0	0	0	0	0	0	0
499	273083	112.9	96.66	129.15	8.29	0	0	0	0	0	0	0	0	0	0	0	0	0	0	0	0	0	0	0	0	0	0	0	0	0	0	0	0	0	0	0	0	0	0	0	0	0	0	0
500	273630	112.9	96.66	129.15	8.29	0	0	0	0	0	0	0	0	0	0	0	0	0	0	0	0	0	0	0	0	0	0	0	0	0	0	0	0	0	0	0	0	0	0	0	0	0	0	0

## Sheet: Zooplankton eutrophy
EstimateS (Version 9.1.0), Copyright R. K. Colwell: http://purl.oclc.org/estimates
Diversity Output from Input File: DIMI (11, sierpieÄ 2017, )
Reference Sample = 35
Samples	Individuals (computed)	S(est)	S(est) 95% CI Lower Bound	S(est) 95% CI Upper Bound	S(est) SD	S Mean (runs)	Singletons Mean	Singletons SD (runs)	Doubletons Mean	Doubletons SD (runs)	Uniques Mean	Uniques SD (runs)	Duplicates Mean	Duplicates SD (runs)	ACE Mean	ACE SD (runs)	ICE Mean	ICE SD (runs)	Chao 1 Mean	Chao 1 95% CI Lower Bound	Chao 1 95% CI Upper Bound	Chao 1 SD (analytical)	Chao 2 Mean	Chao 2 95% CI Lower Bound	Chao 2 95% CI Upper Bound	Chao 2 SD (analytical)	Jack 1 Mean	Jack 1 SD (analytical)	Jack 2 Mean	Jack 2 SD (runs)	Bootstrap Mean	Bootstrap SD (runs)	MMRuns Mean	MMMeans (1 run)	Cole Rarefaction	Cole SD (analytical)	Alpha Mean	Alpha SD (analytical)	Shannon Mean	Shannon SD (runs)	Shannon Exponential Mean	Shannon Exponential SD (runs)	Simpson Inv Mean	Simpson Inv SD (runs)
1	1651.51	20.66	15.7	25.62	2.53	20.82	6.13	3.72	1.62	1.76	20.82	3.64	0	0	33.15	14.54	20.82	3.64	35.47	25.06	76.4	11.02	20.82	32.94	32.94	0	20.82	0	0	0	20.82	3.64	0	0	39.62	2.26	4.01	0.4	1.79	0.4	6.42	2.3	4.42	1.86
2	3303.03	29.96	23.87	36.06	3.11	30.09	7.55	3.8	2.25	1.74	18.96	4.82	11.13	2.92	42.22	15.35	79.57	32.84	43.31	33.55	83.67	10.64	38.63	32.86	56.9	5.41	39.57	1.96	39.57	6.16	34.83	5.08	56.63	54.52	44.82	2.38	5.12	0.39	2.02	0.38	8.02	2.82	5.23	2.18
3	4954.54	35.69	29.19	42.19	3.31	35.7	7.48	3.23	2.59	1.81	16.86	4.42	11.06	2.46	45.56	11.71	57.52	14.34	47.47	38.75	84.06	9.59	44.09	38.34	62.84	5.48	46.94	3.07	50.72	8.11	41.11	5.27	61.69	55.82	48.18	2.44	5.6	0.37	2.09	0.33	8.52	2.72	5.38	2.1
4	6606.06	39.75	33.14	46.37	3.38	39.93	7.88	3.3	2.6	1.84	16.34	4.25	9.61	2.82	50.35	12.13	57.15	11.18	53.07	43.36	93.1	10.56	50.37	43.21	73.72	6.83	52.19	3.57	57.15	8.72	45.73	5.19	68.93	56.93	50.73	2.48	5.95	0.36	2.14	0.27	8.83	2.47	5.49	1.85
5	8257.57	42.9	36.29	49.51	3.37	43.28	8.45	3.31	2.58	1.63	16.13	3.98	8.72	2.51	54.44	11.35	58.65	9.76	56.31	46.48	98	10.9	54.67	46.83	80.32	7.49	56.18	3.87	61.94	8.85	49.32	5.15	64.4	57.95	52.8	2.5	6.25	0.35	2.2	0.23	9.29	2.23	5.77	1.65
6	9909.09	45.5	38.96	52.05	3.34	45.66	8.48	3.09	2.93	1.78	15.52	3.71	8.19	2.59	56.54	9.3	59.41	8.36	57.1	48.42	94.65	9.74	57.38	49.24	84.53	7.87	58.59	3.94	64.57	8.48	51.7	4.79	62.32	58.9	54.57	2.5	6.39	0.34	2.22	0.22	9.47	2.13	5.85	1.48
7	11560.6	47.74	41.28	54.19	3.29	47.89	8.8	2.95	2.94	1.74	15.75	3.76	7.34	2.6	59.45	9.37	61.62	8.19	60.8	51.18	100.57	10.51	62.06	52.24	94.59	9.46	61.39	4	68.27	9.01	54.09	4.73	62.23	59.8	56.1	2.5	6.54	0.34	2.24	0.19	9.59	1.88	5.94	1.42
8	13212.1	49.71	43.36	56.06	3.24	49.78	9.17	3.18	2.85	1.47	16.07	3.97	6.65	2.34	61.98	10.8	63.85	8.7	63.3	53.32	103.97	10.8	66.4	54.93	104	10.98	63.84	4.08	71.62	9.9	56.13	5.09	62.46	60.67	57.47	2.5	6.63	0.33	2.26	0.18	9.78	1.88	6.07	1.47
9	14863.6	51.49	45.25	57.73	3.18	51.67	9.63	3.25	3.22	1.74	16.29	3.69	6.79	2.34	65.19	12.07	65.96	8.01	66.18	55.62	107.58	11.17	68.79	56.99	107.25	11.26	66.15	4.22	74.2	9.43	58.19	4.58	62.92	61.51	58.71	2.48	6.78	0.33	2.27	0.18	9.83	1.81	6.09	1.45
10	16515.1	53.12	46.98	59.25	3.13	53.2	9.83	3.33	3.29	1.73	16.4	3.82	6.71	2.77	66.74	10.69	67.67	8.14	66.76	56.61	108.26	11.03	71.9	59.02	113.79	12.28	67.96	4.33	76.31	9.9	59.81	4.51	63.43	62.31	59.83	2.46	6.91	0.33	2.29	0.17	10.03	1.79	6.22	1.45
11	18166.7	54.62	48.59	60.65	3.08	54.65	9.97	3.24	3.47	1.79	16.57	3.75	6.89	2.72	68.16	9.88	69.28	8.1	68.18	58.07	109.17	10.93	73.6	60.56	115.9	12.41	69.71	4.29	78.2	9.79	61.39	4.44	64	63.09	60.87	2.43	7.02	0.33	2.3	0.16	10.13	1.69	6.24	1.37
12	19818.2	56.02	50.09	61.94	3.02	56.26	10.74	3.27	3.58	1.71	17.14	3.91	6.87	2.75	71.76	10.76	71.74	8.39	71.55	60.25	115.87	11.99	77.4	62.93	123.68	13.66	71.97	4.4	81.05	10.28	63.23	4.43	64.66	63.84	61.83	2.4	7.16	0.33	2.32	0.16	10.33	1.74	6.38	1.39
13	21469.7	57.32	51.49	63.16	2.98	57.59	10.92	3.33	3.81	1.53	17.26	3.71	7.08	2.78	73.66	11.08	73.35	7.95	72.11	61.39	113.94	11.33	77.85	64.02	121.83	13.02	73.52	4.49	82.64	9.65	64.67	4.08	65.33	64.56	62.72	2.36	7.26	0.32	2.33	0.16	10.41	1.66	6.38	1.33
14	23121.2	58.55	52.81	64.3	2.93	58.84	10.89	3.14	4.05	1.59	17.33	3.56	7.35	2.72	74.32	10.59	74.85	7.86	72.49	62.43	111.57	10.61	77.98	64.94	119.3	12.25	74.93	4.48	83.97	9.26	66	4.21	65.98	65.26	63.56	2.33	7.36	0.32	2.34	0.15	10.48	1.55	6.41	1.26
15	24772.7	59.71	54.05	65.37	2.89	59.88	10.93	2.98	4.1	1.54	17.29	3.19	7.56	2.72	74.92	9.86	76.09	7.42	73.25	63.41	111.34	10.35	78.34	65.73	118.42	11.86	76.02	4.46	84.92	8.48	67.08	4.11	66.59	65.93	64.34	2.28	7.44	0.32	2.35	0.14	10.57	1.45	6.45	1.22
16	26424.2	60.81	55.22	66.39	2.85	60.97	11.1	2.96	4.23	1.68	17.39	3.11	7.78	2.73	76.27	10.01	77.71	7.17	74.77	64.65	113.64	10.6	79.35	66.84	118.86	11.73	77.27	4.49	86.14	8.31	68.26	3.69	67.18	66.58	65.08	2.24	7.49	0.32	2.35	0.13	10.61	1.35	6.47	1.15
17	28075.7	61.85	56.33	67.36	2.81	62.17	11.33	3.01	4.33	1.69	17.74	3.29	7.89	2.82	77.79	9.85	79.87	7.9	76.58	66.12	116.03	10.84	81.4	68.36	122.2	12.16	78.87	4.58	87.99	8.82	69.62	3.78	67.79	67.2	65.78	2.19	7.58	0.32	2.36	0.12	10.65	1.29	6.47	1.12
18	29727.3	62.84	57.38	68.29	2.78	63.01	11.37	3.07	4.43	1.57	17.57	3.17	8.17	2.71	78.43	9.88	80.8	7.42	76.33	66.55	113.93	10.26	80.92	68.77	119.03	11.35	79.6	4.59	88.39	8.48	70.46	3.73	68.36	67.81	66.44	2.13	7.64	0.32	2.36	0.12	10.68	1.27	6.47	1.1
19	31378.8	63.78	58.38	69.17	2.75	63.94	11.43	2.9	4.51	1.57	17.62	3.1	8.44	2.57	79.17	9.31	82.19	7.67	77.02	67.4	114.04	10.09	81.08	69.47	117.35	10.82	80.63	4.6	89.27	8.25	71.45	3.65	68.91	68.39	67.06	2.08	7.7	0.32	2.36	0.11	10.69	1.22	6.46	1.07
20	33030.3	64.67	59.33	70.02	2.73	64.86	11.56	2.85	4.58	1.42	17.79	3.21	8.59	2.45	80.03	8.95	83.86	7.87	77.45	68.21	112.77	9.66	82.11	70.47	118.19	10.8	81.76	4.63	90.45	8.6	72.48	3.55	69.44	68.95	67.66	2.02	7.78	0.32	2.37	0.11	10.77	1.2	6.51	1.06
21	34681.8	65.54	60.24	70.84	2.7	65.73	11.65	2.88	4.77	1.62	17.91	3.43	8.75	2.56	81.08	9.13	85.35	8.54	78.39	69.11	113.75	9.68	83.21	71.45	119.51	10.89	82.79	4.64	91.47	9.13	73.43	3.64	69.97	69.5	68.22	1.96	7.85	0.32	2.38	0.1	10.87	1.12	6.55	1
22	36333.3	66.39	61.13	71.64	2.68	66.61	11.87	2.73	4.9	1.6	18.07	3.36	9.03	2.68	81.96	8.4	86.85	8.34	79.24	70	114.25	9.61	84.16	72.37	120.42	10.89	83.86	4.69	92.47	8.99	74.41	3.41	70.49	70.03	68.76	1.9	7.9	0.32	2.38	0.1	10.86	1.09	6.52	0.95
23	37984.8	67.11	61.89	72.34	2.67	67.33	11.88	2.7	4.93	1.53	17.91	3.27	9.36	2.55	82.35	8.4	87.35	8.02	80.02	70.74	115.03	9.62	83.62	72.68	117.26	10.11	84.46	4.68	92.66	8.82	75.13	3.33	70.98	70.54	69.27	1.83	7.96	0.31	2.38	0.09	10.9	1.02	6.55	0.9
24	39636.3	67.85	62.65	73.05	2.65	67.87	11.81	2.65	5.18	1.55	17.84	3.28	9.62	2.68	82.55	8.19	88	8.1	79.86	71.09	113.02	9.11	83.7	73.07	116.35	9.81	84.97	4.67	92.89	8.94	75.68	3.29	71.43	71.03	69.76	1.76	7.99	0.31	2.38	0.08	10.89	0.91	6.52	0.81
25	41287.9	68.55	63.38	73.73	2.64	68.76	12.01	2.35	5.25	1.48	17.92	3.08	10.1	2.61	83.39	7.22	89.24	7.87	80.58	71.93	113.19	8.97	83.73	73.68	114.54	9.26	85.96	4.7	93.54	8.4	76.67	3.16	71.9	71.5	70.23	1.68	8.06	0.31	2.39	0.07	10.92	0.81	6.51	0.74
26	42939.4	69.23	64.07	74.38	2.63	69.33	11.81	2.3	5.37	1.43	17.69	3.19	10.43	2.53	83.26	6.85	89.52	8.19	80.28	72.24	110.87	8.38	83.58	74	113.07	8.85	86.34	4.66	93.43	8.69	77.22	3.17	72.33	71.95	70.67	1.6	8.09	0.31	2.39	0.07	10.92	0.75	6.49	0.68
27	44590.9	69.87	64.73	75.01	2.62	69.8	11.74	2.36	5.5	1.31	17.37	3.39	10.95	2.56	83.5	6.79	89.56	8.38	80.42	72.63	110.03	8.11	83.08	74.14	110.74	8.28	86.53	4.61	92.86	9.31	77.64	3.25	72.74	72.4	71.1	1.52	8.11	0.31	2.39	0.06	10.95	0.69	6.5	0.62
28	46242.4	70.48	65.35	75.61	2.62	70.52	11.61	2.18	5.6	1.37	17.05	3.11	11.45	2.46	83.7	6.07	89.57	7.5	80.79	73.23	109.75	7.91	82.57	74.42	108.09	7.6	86.96	4.6	92.55	8.58	78.32	2.98	73.14	72.82	71.51	1.43	8.16	0.31	2.4	0.05	11	0.6	6.54	0.55
29	47893.9	71.06	65.93	76.19	2.62	71.2	11.68	2.04	5.7	1.3	16.96	3.08	11.81	2.21	84.29	5.63	90.14	7.44	81.37	73.89	109.95	7.82	82.59	74.88	106.79	7.2	87.58	4.64	92.76	8.51	79.03	2.85	73.54	73.23	71.91	1.33	8.22	0.31	2.4	0.05	11	0.57	6.53	0.52
30	49545.4	71.61	66.49	76.74	2.62	71.77	11.64	1.78	5.81	1.37	16.75	2.66	12.17	2.1	84.55	4.86	90.25	6.26	81.66	74.37	109.66	7.65	82.34	75.14	105.21	6.77	87.96	4.57	92.63	7.45	79.59	2.53	73.92	73.63	72.29	1.22	8.26	0.31	2.4	0.05	11.05	0.52	6.56	0.49
31	51196.9	72.14	67.01	77.28	2.62	72.3	11.65	1.65	5.83	1.39	16.64	2.53	12.42	2.13	84.88	4.27	90.68	5.96	82.16	74.89	110.07	7.62	82.52	75.54	104.77	6.58	88.4	4.6	92.74	6.99	80.12	2.16	74.29	74.01	72.66	1.09	8.3	0.31	2.4	0.05	11.06	0.51	6.55	0.47
32	52848.5	72.64	67.5	77.79	2.62	72.81	11.46	1.41	5.95	1.26	16.37	2.26	12.81	2.09	84.88	3.57	90.61	5.07	82.05	75.21	108.59	7.22	82.34	75.79	103.47	6.21	88.67	4.57	92.39	6.32	80.6	1.72	74.65	74.38	73.01	0.95	8.33	0.31	2.41	0.04	11.09	0.41	6.56	0.38
33	54500	73.12	67.96	78.28	2.63	73.35	11.43	1.08	5.99	0.97	16.06	1.85	13.24	1.66	85.15	2.64	90.53	4.07	82.26	75.65	108	6.99	82.04	76.02	101.78	5.77	88.92	4.58	91.96	5.2	81.09	1.15	75	74.73	73.35	0.78	8.36	0.31	2.41	0.03	11.1	0.33	6.55	0.31
34	56151.5	73.57	68.39	78.75	2.64	73.66	11.15	0.78	6.06	0.75	15.35	1.26	13.81	1.29	84.82	1.82	89.47	2.67	81.87	75.74	106.18	6.55	81.08	75.86	98.82	5.11	88.56	4.51	90.4	3.65	81.23	0.87	75.33	75.07	73.68	0.56	8.36	0.31	2.41	0.02	11.1	0.22	6.54	0.2
35	57803	74	68.79	79.21	2.66	74	11	0	6	0	15	0	14	0	84.77	0	89.08	0.01	81.86	75.96	105.47	6.34	80.8	75.96	97.57	4.79	88.57	4.47	89.9	0	81.48	0	75.64	75.4	0	0	8.37	0.31	2.41	0	11.1	0	6.53	0
36	59454.5	74.41	69.17	79.65	2.67	0	0	0	0	0	0	0	0	0	0	0	0	0	0	0	0	0	0	0	0	0	0	0	0	0	0	0	0	0	0	0	0	0	0	0	0	0	0	0
37	61106	74.79	69.51	80.07	2.69	0	0	0	0	0	0	0	0	0	0	0	0	0	0	0	0	0	0	0	0	0	0	0	0	0	0	0	0	0	0	0	0	0	0	0	0	0	0	0
38	62757.5	75.16	69.83	80.48	2.72	0	0	0	0	0	0	0	0	0	0	0	0	0	0	0	0	0	0	0	0	0	0	0	0	0	0	0	0	0	0	0	0	0	0	0	0	0	0	0
39	64409.1	75.5	70.13	80.88	2.74	0	0	0	0	0	0	0	0	0	0	0	0	0	0	0	0	0	0	0	0	0	0	0	0	0	0	0	0	0	0	0	0	0	0	0	0	0	0	0
40	66060.6	75.83	70.4	81.26	2.77	0	0	0	0	0	0	0	0	0	0	0	0	0	0	0	0	0	0	0	0	0	0	0	0	0	0	0	0	0	0	0	0	0	0	0	0	0	0	0
41	67712.1	76.14	70.65	81.63	2.8	0	0	0	0	0	0	0	0	0	0	0	0	0	0	0	0	0	0	0	0	0	0	0	0	0	0	0	0	0	0	0	0	0	0	0	0	0	0	0
42	69363.6	76.44	70.88	81.99	2.84	0	0	0	0	0	0	0	0	0	0	0	0	0	0	0	0	0	0	0	0	0	0	0	0	0	0	0	0	0	0	0	0	0	0	0	0	0	0	0
43	71015.1	76.72	71.09	82.34	2.87	0	0	0	0	0	0	0	0	0	0	0	0	0	0	0	0	0	0	0	0	0	0	0	0	0	0	0	0	0	0	0	0	0	0	0	0	0	0	0
44	72666.6	76.98	71.28	82.69	2.91	0	0	0	0	0	0	0	0	0	0	0	0	0	0	0	0	0	0	0	0	0	0	0	0	0	0	0	0	0	0	0	0	0	0	0	0	0	0	0
45	74318.1	77.23	71.45	83.02	2.95	0	0	0	0	0	0	0	0	0	0	0	0	0	0	0	0	0	0	0	0	0	0	0	0	0	0	0	0	0	0	0	0	0	0	0	0	0	0	0
46	75969.7	77.47	71.6	83.34	2.99	0	0	0	0	0	0	0	0	0	0	0	0	0	0	0	0	0	0	0	0	0	0	0	0	0	0	0	0	0	0	0	0	0	0	0	0	0	0	0
47	77621.2	77.7	71.74	83.65	3.04	0	0	0	0	0	0	0	0	0	0	0	0	0	0	0	0	0	0	0	0	0	0	0	0	0	0	0	0	0	0	0	0	0	0	0	0	0	0	0
48	79272.7	77.91	71.86	83.96	3.09	0	0	0	0	0	0	0	0	0	0	0	0	0	0	0	0	0	0	0	0	0	0	0	0	0	0	0	0	0	0	0	0	0	0	0	0	0	0	0
49	80924.2	78.11	71.97	84.25	3.13	0	0	0	0	0	0	0	0	0	0	0	0	0	0	0	0	0	0	0	0	0	0	0	0	0	0	0	0	0	0	0	0	0	0	0	0	0	0	0
50	82575.7	78.3	72.07	84.54	3.18	0	0	0	0	0	0	0	0	0	0	0	0	0	0	0	0	0	0	0	0	0	0	0	0	0	0	0	0	0	0	0	0	0	0	0	0	0	0	0
51	84227.2	78.49	72.15	84.82	3.23	0	0	0	0	0	0	0	0	0	0	0	0	0	0	0	0	0	0	0	0	0	0	0	0	0	0	0	0	0	0	0	0	0	0	0	0	0	0	0
52	85878.7	78.66	72.23	85.09	3.28	0	0	0	0	0	0	0	0	0	0	0	0	0	0	0	0	0	0	0	0	0	0	0	0	0	0	0	0	0	0	0	0	0	0	0	0	0	0	0
53	87530.3	78.82	72.29	85.36	3.33	0	0	0	0	0	0	0	0	0	0	0	0	0	0	0	0	0	0	0	0	0	0	0	0	0	0	0	0	0	0	0	0	0	0	0	0	0	0	0
54	89181.8	78.98	72.35	85.61	3.38	0	0	0	0	0	0	0	0	0	0	0	0	0	0	0	0	0	0	0	0	0	0	0	0	0	0	0	0	0	0	0	0	0	0	0	0	0	0	0
55	90833.3	79.13	72.39	85.86	3.44	0	0	0	0	0	0	0	0	0	0	0	0	0	0	0	0	0	0	0	0	0	0	0	0	0	0	0	0	0	0	0	0	0	0	0	0	0	0	0
56	92484.8	79.27	72.43	86.1	3.49	0	0	0	0	0	0	0	0	0	0	0	0	0	0	0	0	0	0	0	0	0	0	0	0	0	0	0	0	0	0	0	0	0	0	0	0	0	0	0
57	94136.3	79.4	72.46	86.33	3.54	0	0	0	0	0	0	0	0	0	0	0	0	0	0	0	0	0	0	0	0	0	0	0	0	0	0	0	0	0	0	0	0	0	0	0	0	0	0	0
58	95787.8	79.52	72.49	86.56	3.59	0	0	0	0	0	0	0	0	0	0	0	0	0	0	0	0	0	0	0	0	0	0	0	0	0	0	0	0	0	0	0	0	0	0	0	0	0	0	0
59	97439.3	79.64	72.51	86.77	3.64	0	0	0	0	0	0	0	0	0	0	0	0	0	0	0	0	0	0	0	0	0	0	0	0	0	0	0	0	0	0	0	0	0	0	0	0	0	0	0
60	99090.9	79.75	72.52	86.98	3.69	0	0	0	0	0	0	0	0	0	0	0	0	0	0	0	0	0	0	0	0	0	0	0	0	0	0	0	0	0	0	0	0	0	0	0	0	0	0	0
61	100742	79.86	72.53	87.19	3.74	0	0	0	0	0	0	0	0	0	0	0	0	0	0	0	0	0	0	0	0	0	0	0	0	0	0	0	0	0	0	0	0	0	0	0	0	0	0	0
62	102394	79.96	72.54	87.39	3.79	0	0	0	0	0	0	0	0	0	0	0	0	0	0	0	0	0	0	0	0	0	0	0	0	0	0	0	0	0	0	0	0	0	0	0	0	0	0	0
63	104045	80.06	72.54	87.58	3.84	0	0	0	0	0	0	0	0	0	0	0	0	0	0	0	0	0	0	0	0	0	0	0	0	0	0	0	0	0	0	0	0	0	0	0	0	0	0	0
64	105697	80.15	72.54	87.76	3.88	0	0	0	0	0	0	0	0	0	0	0	0	0	0	0	0	0	0	0	0	0	0	0	0	0	0	0	0	0	0	0	0	0	0	0	0	0	0	0
65	107348	80.24	72.53	87.94	3.93	0	0	0	0	0	0	0	0	0	0	0	0	0	0	0	0	0	0	0	0	0	0	0	0	0	0	0	0	0	0	0	0	0	0	0	0	0	0	0
66	109000	80.32	72.53	88.11	3.97	0	0	0	0	0	0	0	0	0	0	0	0	0	0	0	0	0	0	0	0	0	0	0	0	0	0	0	0	0	0	0	0	0	0	0	0	0	0	0
67	110651	80.39	72.52	88.27	4.02	0	0	0	0	0	0	0	0	0	0	0	0	0	0	0	0	0	0	0	0	0	0	0	0	0	0	0	0	0	0	0	0	0	0	0	0	0	0	0
68	112303	80.47	72.51	88.43	4.06	0	0	0	0	0	0	0	0	0	0	0	0	0	0	0	0	0	0	0	0	0	0	0	0	0	0	0	0	0	0	0	0	0	0	0	0	0	0	0
69	113954	80.54	72.49	88.58	4.11	0	0	0	0	0	0	0	0	0	0	0	0	0	0	0	0	0	0	0	0	0	0	0	0	0	0	0	0	0	0	0	0	0	0	0	0	0	0	0
70	115606	80.6	72.48	88.73	4.15	0	0	0	0	0	0	0	0	0	0	0	0	0	0	0	0	0	0	0	0	0	0	0	0	0	0	0	0	0	0	0	0	0	0	0	0	0	0	0
71	117258	80.67	72.46	88.87	4.19	0	0	0	0	0	0	0	0	0	0	0	0	0	0	0	0	0	0	0	0	0	0	0	0	0	0	0	0	0	0	0	0	0	0	0	0	0	0	0
72	118909	80.73	72.44	89.01	4.23	0	0	0	0	0	0	0	0	0	0	0	0	0	0	0	0	0	0	0	0	0	0	0	0	0	0	0	0	0	0	0	0	0	0	0	0	0	0	0
73	120561	80.78	72.42	89.14	4.27	0	0	0	0	0	0	0	0	0	0	0	0	0	0	0	0	0	0	0	0	0	0	0	0	0	0	0	0	0	0	0	0	0	0	0	0	0	0	0
74	122212	80.84	72.4	89.27	4.3	0	0	0	0	0	0	0	0	0	0	0	0	0	0	0	0	0	0	0	0	0	0	0	0	0	0	0	0	0	0	0	0	0	0	0	0	0	0	0
75	123864	80.89	72.38	89.39	4.34	0	0	0	0	0	0	0	0	0	0	0	0	0	0	0	0	0	0	0	0	0	0	0	0	0	0	0	0	0	0	0	0	0	0	0	0	0	0	0
76	125515	80.93	72.36	89.51	4.38	0	0	0	0	0	0	0	0	0	0	0	0	0	0	0	0	0	0	0	0	0	0	0	0	0	0	0	0	0	0	0	0	0	0	0	0	0	0	0
77	127167	80.98	72.34	89.62	4.41	0	0	0	0	0	0	0	0	0	0	0	0	0	0	0	0	0	0	0	0	0	0	0	0	0	0	0	0	0	0	0	0	0	0	0	0	0	0	0
78	128818	81.02	72.31	89.73	4.44	0	0	0	0	0	0	0	0	0	0	0	0	0	0	0	0	0	0	0	0	0	0	0	0	0	0	0	0	0	0	0	0	0	0	0	0	0	0	0
79	130470	81.06	72.29	89.83	4.48	0	0	0	0	0	0	0	0	0	0	0	0	0	0	0	0	0	0	0	0	0	0	0	0	0	0	0	0	0	0	0	0	0	0	0	0	0	0	0
80	132121	81.1	72.27	89.93	4.51	0	0	0	0	0	0	0	0	0	0	0	0	0	0	0	0	0	0	0	0	0	0	0	0	0	0	0	0	0	0	0	0	0	0	0	0	0	0	0
81	133773	81.14	72.25	90.03	4.54	0	0	0	0	0	0	0	0	0	0	0	0	0	0	0	0	0	0	0	0	0	0	0	0	0	0	0	0	0	0	0	0	0	0	0	0	0	0	0
82	135424	81.17	72.22	90.12	4.57	0	0	0	0	0	0	0	0	0	0	0	0	0	0	0	0	0	0	0	0	0	0	0	0	0	0	0	0	0	0	0	0	0	0	0	0	0	0	0
83	137076	81.21	72.2	90.21	4.6	0	0	0	0	0	0	0	0	0	0	0	0	0	0	0	0	0	0	0	0	0	0	0	0	0	0	0	0	0	0	0	0	0	0	0	0	0	0	0
84	138727	81.24	72.18	90.3	4.62	0	0	0	0	0	0	0	0	0	0	0	0	0	0	0	0	0	0	0	0	0	0	0	0	0	0	0	0	0	0	0	0	0	0	0	0	0	0	0
85	140379	81.27	72.15	90.38	4.65	0	0	0	0	0	0	0	0	0	0	0	0	0	0	0	0	0	0	0	0	0	0	0	0	0	0	0	0	0	0	0	0	0	0	0	0	0	0	0
86	142030	81.29	72.13	90.46	4.67	0	0	0	0	0	0	0	0	0	0	0	0	0	0	0	0	0	0	0	0	0	0	0	0	0	0	0	0	0	0	0	0	0	0	0	0	0	0	0
87	143682	81.32	72.11	90.53	4.7	0	0	0	0	0	0	0	0	0	0	0	0	0	0	0	0	0	0	0	0	0	0	0	0	0	0	0	0	0	0	0	0	0	0	0	0	0	0	0
88	145333	81.35	72.09	90.61	4.72	0	0	0	0	0	0	0	0	0	0	0	0	0	0	0	0	0	0	0	0	0	0	0	0	0	0	0	0	0	0	0	0	0	0	0	0	0	0	0
89	146985	81.37	72.07	90.67	4.75	0	0	0	0	0	0	0	0	0	0	0	0	0	0	0	0	0	0	0	0	0	0	0	0	0	0	0	0	0	0	0	0	0	0	0	0	0	0	0
90	148636	81.39	72.05	90.74	4.77	0	0	0	0	0	0	0	0	0	0	0	0	0	0	0	0	0	0	0	0	0	0	0	0	0	0	0	0	0	0	0	0	0	0	0	0	0	0	0
91	150288	81.41	72.02	90.8	4.79	0	0	0	0	0	0	0	0	0	0	0	0	0	0	0	0	0	0	0	0	0	0	0	0	0	0	0	0	0	0	0	0	0	0	0	0	0	0	0
92	151939	81.44	72	90.87	4.81	0	0	0	0	0	0	0	0	0	0	0	0	0	0	0	0	0	0	0	0	0	0	0	0	0	0	0	0	0	0	0	0	0	0	0	0	0	0	0
93	153591	81.45	71.98	90.92	4.83	0	0	0	0	0	0	0	0	0	0	0	0	0	0	0	0	0	0	0	0	0	0	0	0	0	0	0	0	0	0	0	0	0	0	0	0	0	0	0
94	155242	81.47	71.97	90.98	4.85	0	0	0	0	0	0	0	0	0	0	0	0	0	0	0	0	0	0	0	0	0	0	0	0	0	0	0	0	0	0	0	0	0	0	0	0	0	0	0
95	156894	81.49	71.95	91.03	4.87	0	0	0	0	0	0	0	0	0	0	0	0	0	0	0	0	0	0	0	0	0	0	0	0	0	0	0	0	0	0	0	0	0	0	0	0	0	0	0
96	158545	81.51	71.93	91.09	4.89	0	0	0	0	0	0	0	0	0	0	0	0	0	0	0	0	0	0	0	0	0	0	0	0	0	0	0	0	0	0	0	0	0	0	0	0	0	0	0
97	160197	81.52	71.91	91.13	4.9	0	0	0	0	0	0	0	0	0	0	0	0	0	0	0	0	0	0	0	0	0	0	0	0	0	0	0	0	0	0	0	0	0	0	0	0	0	0	0
98	161848	81.54	71.89	91.18	4.92	0	0	0	0	0	0	0	0	0	0	0	0	0	0	0	0	0	0	0	0	0	0	0	0	0	0	0	0	0	0	0	0	0	0	0	0	0	0	0
99	163500	81.55	71.87	91.23	4.94	0	0	0	0	0	0	0	0	0	0	0	0	0	0	0	0	0	0	0	0	0	0	0	0	0	0	0	0	0	0	0	0	0	0	0	0	0	0	0
100	165151	81.56	71.86	91.27	4.95	0	0	0	0	0	0	0	0	0	0	0	0	0	0	0	0	0	0	0	0	0	0	0	0	0	0	0	0	0	0	0	0	0	0	0	0	0	0	0
101	166803	81.58	71.84	91.31	4.97	0	0	0	0	0	0	0	0	0	0	0	0	0	0	0	0	0	0	0	0	0	0	0	0	0	0	0	0	0	0	0	0	0	0	0	0	0	0	0
102	168454	81.59	71.83	91.35	4.98	0	0	0	0	0	0	0	0	0	0	0	0	0	0	0	0	0	0	0	0	0	0	0	0	0	0	0	0	0	0	0	0	0	0	0	0	0	0	0
103	170106	81.6	71.81	91.39	4.99	0	0	0	0	0	0	0	0	0	0	0	0	0	0	0	0	0	0	0	0	0	0	0	0	0	0	0	0	0	0	0	0	0	0	0	0	0	0	0
104	171757	81.61	71.8	91.43	5.01	0	0	0	0	0	0	0	0	0	0	0	0	0	0	0	0	0	0	0	0	0	0	0	0	0	0	0	0	0	0	0	0	0	0	0	0	0	0	0
105	173409	81.62	71.78	91.46	5.02	0	0	0	0	0	0	0	0	0	0	0	0	0	0	0	0	0	0	0	0	0	0	0	0	0	0	0	0	0	0	0	0	0	0	0	0	0	0	0
106	175061	81.63	71.77	91.49	5.03	0	0	0	0	0	0	0	0	0	0	0	0	0	0	0	0	0	0	0	0	0	0	0	0	0	0	0	0	0	0	0	0	0	0	0	0	0	0	0
107	176712	81.64	71.75	91.53	5.04	0	0	0	0	0	0	0	0	0	0	0	0	0	0	0	0	0	0	0	0	0	0	0	0	0	0	0	0	0	0	0	0	0	0	0	0	0	0	0
108	178364	81.65	71.74	91.56	5.06	0	0	0	0	0	0	0	0	0	0	0	0	0	0	0	0	0	0	0	0	0	0	0	0	0	0	0	0	0	0	0	0	0	0	0	0	0	0	0
109	180015	81.66	71.73	91.59	5.07	0	0	0	0	0	0	0	0	0	0	0	0	0	0	0	0	0	0	0	0	0	0	0	0	0	0	0	0	0	0	0	0	0	0	0	0	0	0	0
110	181667	81.66	71.71	91.61	5.08	0	0	0	0	0	0	0	0	0	0	0	0	0	0	0	0	0	0	0	0	0	0	0	0	0	0	0	0	0	0	0	0	0	0	0	0	0	0	0
111	183318	81.67	71.7	91.64	5.09	0	0	0	0	0	0	0	0	0	0	0	0	0	0	0	0	0	0	0	0	0	0	0	0	0	0	0	0	0	0	0	0	0	0	0	0	0	0	0
112	184970	81.68	71.69	91.67	5.1	0	0	0	0	0	0	0	0	0	0	0	0	0	0	0	0	0	0	0	0	0	0	0	0	0	0	0	0	0	0	0	0	0	0	0	0	0	0	0
113	186621	81.69	71.68	91.69	5.1	0	0	0	0	0	0	0	0	0	0	0	0	0	0	0	0	0	0	0	0	0	0	0	0	0	0	0	0	0	0	0	0	0	0	0	0	0	0	0
114	188273	81.69	71.67	91.71	5.11	0	0	0	0	0	0	0	0	0	0	0	0	0	0	0	0	0	0	0	0	0	0	0	0	0	0	0	0	0	0	0	0	0	0	0	0	0	0	0
115	189924	81.7	71.66	91.74	5.12	0	0	0	0	0	0	0	0	0	0	0	0	0	0	0	0	0	0	0	0	0	0	0	0	0	0	0	0	0	0	0	0	0	0	0	0	0	0	0
116	191576	81.7	71.65	91.76	5.13	0	0	0	0	0	0	0	0	0	0	0	0	0	0	0	0	0	0	0	0	0	0	0	0	0	0	0	0	0	0	0	0	0	0	0	0	0	0	0
117	193227	81.71	71.64	91.78	5.14	0	0	0	0	0	0	0	0	0	0	0	0	0	0	0	0	0	0	0	0	0	0	0	0	0	0	0	0	0	0	0	0	0	0	0	0	0	0	0
118	194879	81.71	71.63	91.8	5.14	0	0	0	0	0	0	0	0	0	0	0	0	0	0	0	0	0	0	0	0	0	0	0	0	0	0	0	0	0	0	0	0	0	0	0	0	0	0	0
119	196530	81.72	71.62	91.82	5.15	0	0	0	0	0	0	0	0	0	0	0	0	0	0	0	0	0	0	0	0	0	0	0	0	0	0	0	0	0	0	0	0	0	0	0	0	0	0	0
120	198182	81.72	71.61	91.83	5.16	0	0	0	0	0	0	0	0	0	0	0	0	0	0	0	0	0	0	0	0	0	0	0	0	0	0	0	0	0	0	0	0	0	0	0	0	0	0	0
121	199833	81.73	71.6	91.85	5.17	0	0	0	0	0	0	0	0	0	0	0	0	0	0	0	0	0	0	0	0	0	0	0	0	0	0	0	0	0	0	0	0	0	0	0	0	0	0	0
122	201485	81.73	71.6	91.87	5.17	0	0	0	0	0	0	0	0	0	0	0	0	0	0	0	0	0	0	0	0	0	0	0	0	0	0	0	0	0	0	0	0	0	0	0	0	0	0	0
123	203136	81.74	71.59	91.88	5.18	0	0	0	0	0	0	0	0	0	0	0	0	0	0	0	0	0	0	0	0	0	0	0	0	0	0	0	0	0	0	0	0	0	0	0	0	0	0	0
124	204788	81.74	71.58	91.9	5.18	0	0	0	0	0	0	0	0	0	0	0	0	0	0	0	0	0	0	0	0	0	0	0	0	0	0	0	0	0	0	0	0	0	0	0	0	0	0	0
125	206439	81.74	71.57	91.91	5.19	0	0	0	0	0	0	0	0	0	0	0	0	0	0	0	0	0	0	0	0	0	0	0	0	0	0	0	0	0	0	0	0	0	0	0	0	0	0	0
126	208091	81.75	71.57	91.93	5.19	0	0	0	0	0	0	0	0	0	0	0	0	0	0	0	0	0	0	0	0	0	0	0	0	0	0	0	0	0	0	0	0	0	0	0	0	0	0	0
127	209742	81.75	71.56	91.94	5.2	0	0	0	0	0	0	0	0	0	0	0	0	0	0	0	0	0	0	0	0	0	0	0	0	0	0	0	0	0	0	0	0	0	0	0	0	0	0	0
128	211394	81.75	71.55	91.95	5.2	0	0	0	0	0	0	0	0	0	0	0	0	0	0	0	0	0	0	0	0	0	0	0	0	0	0	0	0	0	0	0	0	0	0	0	0	0	0	0
129	213045	81.75	71.55	91.96	5.21	0	0	0	0	0	0	0	0	0	0	0	0	0	0	0	0	0	0	0	0	0	0	0	0	0	0	0	0	0	0	0	0	0	0	0	0	0	0	0
130	214697	81.76	71.54	91.97	5.21	0	0	0	0	0	0	0	0	0	0	0	0	0	0	0	0	0	0	0	0	0	0	0	0	0	0	0	0	0	0	0	0	0	0	0	0	0	0	0
131	216348	81.76	71.54	91.98	5.22	0	0	0	0	0	0	0	0	0	0	0	0	0	0	0	0	0	0	0	0	0	0	0	0	0	0	0	0	0	0	0	0	0	0	0	0	0	0	0
132	218000	81.76	71.53	91.99	5.22	0	0	0	0	0	0	0	0	0	0	0	0	0	0	0	0	0	0	0	0	0	0	0	0	0	0	0	0	0	0	0	0	0	0	0	0	0	0	0
133	219651	81.76	71.52	92	5.22	0	0	0	0	0	0	0	0	0	0	0	0	0	0	0	0	0	0	0	0	0	0	0	0	0	0	0	0	0	0	0	0	0	0	0	0	0	0	0
134	221303	81.77	71.52	92.01	5.23	0	0	0	0	0	0	0	0	0	0	0	0	0	0	0	0	0	0	0	0	0	0	0	0	0	0	0	0	0	0	0	0	0	0	0	0	0	0	0
135	222954	81.77	71.52	92.02	5.23	0	0	0	0	0	0	0	0	0	0	0	0	0	0	0	0	0	0	0	0	0	0	0	0	0	0	0	0	0	0	0	0	0	0	0	0	0	0	0
136	224606	81.77	71.51	92.03	5.23	0	0	0	0	0	0	0	0	0	0	0	0	0	0	0	0	0	0	0	0	0	0	0	0	0	0	0	0	0	0	0	0	0	0	0	0	0	0	0
137	226257	81.77	71.51	92.04	5.24	0	0	0	0	0	0	0	0	0	0	0	0	0	0	0	0	0	0	0	0	0	0	0	0	0	0	0	0	0	0	0	0	0	0	0	0	0	0	0
138	227909	81.77	71.5	92.05	5.24	0	0	0	0	0	0	0	0	0	0	0	0	0	0	0	0	0	0	0	0	0	0	0	0	0	0	0	0	0	0	0	0	0	0	0	0	0	0	0
139	229560	81.78	71.5	92.05	5.24	0	0	0	0	0	0	0	0	0	0	0	0	0	0	0	0	0	0	0	0	0	0	0	0	0	0	0	0	0	0	0	0	0	0	0	0	0	0	0
140	231212	81.78	71.49	92.06	5.25	0	0	0	0	0	0	0	0	0	0	0	0	0	0	0	0	0	0	0	0	0	0	0	0	0	0	0	0	0	0	0	0	0	0	0	0	0	0	0
141	232864	81.78	71.49	92.07	5.25	0	0	0	0	0	0	0	0	0	0	0	0	0	0	0	0	0	0	0	0	0	0	0	0	0	0	0	0	0	0	0	0	0	0	0	0	0	0	0
142	234515	81.78	71.49	92.07	5.25	0	0	0	0	0	0	0	0	0	0	0	0	0	0	0	0	0	0	0	0	0	0	0	0	0	0	0	0	0	0	0	0	0	0	0	0	0	0	0
143	236167	81.78	71.48	92.08	5.25	0	0	0	0	0	0	0	0	0	0	0	0	0	0	0	0	0	0	0	0	0	0	0	0	0	0	0	0	0	0	0	0	0	0	0	0	0	0	0
144	237818	81.78	71.48	92.09	5.26	0	0	0	0	0	0	0	0	0	0	0	0	0	0	0	0	0	0	0	0	0	0	0	0	0	0	0	0	0	0	0	0	0	0	0	0	0	0	0
145	239470	81.78	71.48	92.09	5.26	0	0	0	0	0	0	0	0	0	0	0	0	0	0	0	0	0	0	0	0	0	0	0	0	0	0	0	0	0	0	0	0	0	0	0	0	0	0	0
146	241121	81.79	71.47	92.1	5.26	0	0	0	0	0	0	0	0	0	0	0	0	0	0	0	0	0	0	0	0	0	0	0	0	0	0	0	0	0	0	0	0	0	0	0	0	0	0	0
147	242773	81.79	71.47	92.1	5.26	0	0	0	0	0	0	0	0	0	0	0	0	0	0	0	0	0	0	0	0	0	0	0	0	0	0	0	0	0	0	0	0	0	0	0	0	0	0	0
148	244424	81.79	71.47	92.11	5.27	0	0	0	0	0	0	0	0	0	0	0	0	0	0	0	0	0	0	0	0	0	0	0	0	0	0	0	0	0	0	0	0	0	0	0	0	0	0	0
149	246076	81.79	71.46	92.11	5.27	0	0	0	0	0	0	0	0	0	0	0	0	0	0	0	0	0	0	0	0	0	0	0	0	0	0	0	0	0	0	0	0	0	0	0	0	0	0	0
150	247727	81.79	71.46	92.12	5.27	0	0	0	0	0	0	0	0	0	0	0	0	0	0	0	0	0	0	0	0	0	0	0	0	0	0	0	0	0	0	0	0	0	0	0	0	0	0	0
151	249379	81.79	71.46	92.12	5.27	0	0	0	0	0	0	0	0	0	0	0	0	0	0	0	0	0	0	0	0	0	0	0	0	0	0	0	0	0	0	0	0	0	0	0	0	0	0	0
152	251030	81.79	71.46	92.13	5.27	0	0	0	0	0	0	0	0	0	0	0	0	0	0	0	0	0	0	0	0	0	0	0	0	0	0	0	0	0	0	0	0	0	0	0	0	0	0	0
153	252682	81.79	71.45	92.13	5.27	0	0	0	0	0	0	0	0	0	0	0	0	0	0	0	0	0	0	0	0	0	0	0	0	0	0	0	0	0	0	0	0	0	0	0	0	0	0	0
154	254333	81.79	71.45	92.13	5.28	0	0	0	0	0	0	0	0	0	0	0	0	0	0	0	0	0	0	0	0	0	0	0	0	0	0	0	0	0	0	0	0	0	0	0	0	0	0	0
155	255985	81.79	71.45	92.14	5.28	0	0	0	0	0	0	0	0	0	0	0	0	0	0	0	0	0	0	0	0	0	0	0	0	0	0	0	0	0	0	0	0	0	0	0	0	0	0	0
156	257636	81.79	71.45	92.14	5.28	0	0	0	0	0	0	0	0	0	0	0	0	0	0	0	0	0	0	0	0	0	0	0	0	0	0	0	0	0	0	0	0	0	0	0	0	0	0	0
157	259288	81.79	71.45	92.14	5.28	0	0	0	0	0	0	0	0	0	0	0	0	0	0	0	0	0	0	0	0	0	0	0	0	0	0	0	0	0	0	0	0	0	0	0	0	0	0	0
158	260939	81.8	71.44	92.15	5.28	0	0	0	0	0	0	0	0	0	0	0	0	0	0	0	0	0	0	0	0	0	0	0	0	0	0	0	0	0	0	0	0	0	0	0	0	0	0	0
159	262591	81.8	71.44	92.15	5.28	0	0	0	0	0	0	0	0	0	0	0	0	0	0	0	0	0	0	0	0	0	0	0	0	0	0	0	0	0	0	0	0	0	0	0	0	0	0	0
160	264242	81.8	71.44	92.15	5.28	0	0	0	0	0	0	0	0	0	0	0	0	0	0	0	0	0	0	0	0	0	0	0	0	0	0	0	0	0	0	0	0	0	0	0	0	0	0	0
161	265894	81.8	71.44	92.15	5.28	0	0	0	0	0	0	0	0	0	0	0	0	0	0	0	0	0	0	0	0	0	0	0	0	0	0	0	0	0	0	0	0	0	0	0	0	0	0	0
162	267545	81.8	71.44	92.16	5.29	0	0	0	0	0	0	0	0	0	0	0	0	0	0	0	0	0	0	0	0	0	0	0	0	0	0	0	0	0	0	0	0	0	0	0	0	0	0	0
163	269197	81.8	71.44	92.16	5.29	0	0	0	0	0	0	0	0	0	0	0	0	0	0	0	0	0	0	0	0	0	0	0	0	0	0	0	0	0	0	0	0	0	0	0	0	0	0	0
164	270848	81.8	71.44	92.16	5.29	0	0	0	0	0	0	0	0	0	0	0	0	0	0	0	0	0	0	0	0	0	0	0	0	0	0	0	0	0	0	0	0	0	0	0	0	0	0	0
165	272500	81.8	71.43	92.16	5.29	0	0	0	0	0	0	0	0	0	0	0	0	0	0	0	0	0	0	0	0	0	0	0	0	0	0	0	0	0	0	0	0	0	0	0	0	0	0	0
166	274151	81.8	71.43	92.17	5.29	0	0	0	0	0	0	0	0	0	0	0	0	0	0	0	0	0	0	0	0	0	0	0	0	0	0	0	0	0	0	0	0	0	0	0	0	0	0	0
167	275803	81.8	71.43	92.17	5.29	0	0	0	0	0	0	0	0	0	0	0	0	0	0	0	0	0	0	0	0	0	0	0	0	0	0	0	0	0	0	0	0	0	0	0	0	0	0	0
168	277454	81.8	71.43	92.17	5.29	0	0	0	0	0	0	0	0	0	0	0	0	0	0	0	0	0	0	0	0	0	0	0	0	0	0	0	0	0	0	0	0	0	0	0	0	0	0	0
169	279106	81.8	71.43	92.17	5.29	0	0	0	0	0	0	0	0	0	0	0	0	0	0	0	0	0	0	0	0	0	0	0	0	0	0	0	0	0	0	0	0	0	0	0	0	0	0	0
170	280757	81.8	71.43	92.17	5.29	0	0	0	0	0	0	0	0	0	0	0	0	0	0	0	0	0	0	0	0	0	0	0	0	0	0	0	0	0	0	0	0	0	0	0	0	0	0	0
171	282409	81.8	71.43	92.17	5.29	0	0	0	0	0	0	0	0	0	0	0	0	0	0	0	0	0	0	0	0	0	0	0	0	0	0	0	0	0	0	0	0	0	0	0	0	0	0	0
172	284060	81.8	71.43	92.18	5.29	0	0	0	0	0	0	0	0	0	0	0	0	0	0	0	0	0	0	0	0	0	0	0	0	0	0	0	0	0	0	0	0	0	0	0	0	0	0	0
173	285712	81.8	71.42	92.18	5.29	0	0	0	0	0	0	0	0	0	0	0	0	0	0	0	0	0	0	0	0	0	0	0	0	0	0	0	0	0	0	0	0	0	0	0	0	0	0	0
174	287363	81.8	71.42	92.18	5.29	0	0	0	0	0	0	0	0	0	0	0	0	0	0	0	0	0	0	0	0	0	0	0	0	0	0	0	0	0	0	0	0	0	0	0	0	0	0	0
175	289015	81.8	71.42	92.18	5.3	0	0	0	0	0	0	0	0	0	0	0	0	0	0	0	0	0	0	0	0	0	0	0	0	0	0	0	0	0	0	0	0	0	0	0	0	0	0	0
176	290667	81.8	71.42	92.18	5.3	0	0	0	0	0	0	0	0	0	0	0	0	0	0	0	0	0	0	0	0	0	0	0	0	0	0	0	0	0	0	0	0	0	0	0	0	0	0	0
177	292318	81.8	71.42	92.18	5.3	0	0	0	0	0	0	0	0	0	0	0	0	0	0	0	0	0	0	0	0	0	0	0	0	0	0	0	0	0	0	0	0	0	0	0	0	0	0	0
178	293970	81.8	71.42	92.18	5.3	0	0	0	0	0	0	0	0	0	0	0	0	0	0	0	0	0	0	0	0	0	0	0	0	0	0	0	0	0	0	0	0	0	0	0	0	0	0	0
179	295621	81.8	71.42	92.19	5.3	0	0	0	0	0	0	0	0	0	0	0	0	0	0	0	0	0	0	0	0	0	0	0	0	0	0	0	0	0	0	0	0	0	0	0	0	0	0	0
180	297273	81.8	71.42	92.19	5.3	0	0	0	0	0	0	0	0	0	0	0	0	0	0	0	0	0	0	0	0	0	0	0	0	0	0	0	0	0	0	0	0	0	0	0	0	0	0	0
181	298924	81.8	71.42	92.19	5.3	0	0	0	0	0	0	0	0	0	0	0	0	0	0	0	0	0	0	0	0	0	0	0	0	0	0	0	0	0	0	0	0	0	0	0	0	0	0	0
182	300576	81.8	71.42	92.19	5.3	0	0	0	0	0	0	0	0	0	0	0	0	0	0	0	0	0	0	0	0	0	0	0	0	0	0	0	0	0	0	0	0	0	0	0	0	0	0	0
183	302227	81.8	71.42	92.19	5.3	0	0	0	0	0	0	0	0	0	0	0	0	0	0	0	0	0	0	0	0	0	0	0	0	0	0	0	0	0	0	0	0	0	0	0	0	0	0	0
184	303879	81.8	71.42	92.19	5.3	0	0	0	0	0	0	0	0	0	0	0	0	0	0	0	0	0	0	0	0	0	0	0	0	0	0	0	0	0	0	0	0	0	0	0	0	0	0	0
185	305530	81.8	71.42	92.19	5.3	0	0	0	0	0	0	0	0	0	0	0	0	0	0	0	0	0	0	0	0	0	0	0	0	0	0	0	0	0	0	0	0	0	0	0	0	0	0	0
186	307182	81.8	71.42	92.19	5.3	0	0	0	0	0	0	0	0	0	0	0	0	0	0	0	0	0	0	0	0	0	0	0	0	0	0	0	0	0	0	0	0	0	0	0	0	0	0	0
187	308833	81.8	71.42	92.19	5.3	0	0	0	0	0	0	0	0	0	0	0	0	0	0	0	0	0	0	0	0	0	0	0	0	0	0	0	0	0	0	0	0	0	0	0	0	0	0	0
188	310485	81.8	71.41	92.19	5.3	0	0	0	0	0	0	0	0	0	0	0	0	0	0	0	0	0	0	0	0	0	0	0	0	0	0	0	0	0	0	0	0	0	0	0	0	0	0	0
189	312136	81.8	71.41	92.19	5.3	0	0	0	0	0	0	0	0	0	0	0	0	0	0	0	0	0	0	0	0	0	0	0	0	0	0	0	0	0	0	0	0	0	0	0	0	0	0	0
190	313788	81.8	71.41	92.19	5.3	0	0	0	0	0	0	0	0	0	0	0	0	0	0	0	0	0	0	0	0	0	0	0	0	0	0	0	0	0	0	0	0	0	0	0	0	0	0	0
191	315439	81.8	71.41	92.2	5.3	0	0	0	0	0	0	0	0	0	0	0	0	0	0	0	0	0	0	0	0	0	0	0	0	0	0	0	0	0	0	0	0	0	0	0	0	0	0	0
192	317091	81.8	71.41	92.2	5.3	0	0	0	0	0	0	0	0	0	0	0	0	0	0	0	0	0	0	0	0	0	0	0	0	0	0	0	0	0	0	0	0	0	0	0	0	0	0	0
193	318742	81.8	71.41	92.2	5.3	0	0	0	0	0	0	0	0	0	0	0	0	0	0	0	0	0	0	0	0	0	0	0	0	0	0	0	0	0	0	0	0	0	0	0	0	0	0	0
194	320394	81.8	71.41	92.2	5.3	0	0	0	0	0	0	0	0	0	0	0	0	0	0	0	0	0	0	0	0	0	0	0	0	0	0	0	0	0	0	0	0	0	0	0	0	0	0	0
195	322045	81.8	71.41	92.2	5.3	0	0	0	0	0	0	0	0	0	0	0	0	0	0	0	0	0	0	0	0	0	0	0	0	0	0	0	0	0	0	0	0	0	0	0	0	0	0	0
196	323697	81.8	71.41	92.2	5.3	0	0	0	0	0	0	0	0	0	0	0	0	0	0	0	0	0	0	0	0	0	0	0	0	0	0	0	0	0	0	0	0	0	0	0	0	0	0	0
197	325348	81.8	71.41	92.2	5.3	0	0	0	0	0	0	0	0	0	0	0	0	0	0	0	0	0	0	0	0	0	0	0	0	0	0	0	0	0	0	0	0	0	0	0	0	0	0	0
198	327000	81.8	71.41	92.2	5.3	0	0	0	0	0	0	0	0	0	0	0	0	0	0	0	0	0	0	0	0	0	0	0	0	0	0	0	0	0	0	0	0	0	0	0	0	0	0	0
199	328651	81.8	71.41	92.2	5.3	0	0	0	0	0	0	0	0	0	0	0	0	0	0	0	0	0	0	0	0	0	0	0	0	0	0	0	0	0	0	0	0	0	0	0	0	0	0	0
200	330303	81.8	71.41	92.2	5.3	0	0	0	0	0	0	0	0	0	0	0	0	0	0	0	0	0	0	0	0	0	0	0	0	0	0	0	0	0	0	0	0	0	0	0	0	0	0	0
201	331954	81.81	71.41	92.2	5.3	0	0	0	0	0	0	0	0	0	0	0	0	0	0	0	0	0	0	0	0	0	0	0	0	0	0	0	0	0	0	0	0	0	0	0	0	0	0	0
202	333606	81.81	71.41	92.2	5.3	0	0	0	0	0	0	0	0	0	0	0	0	0	0	0	0	0	0	0	0	0	0	0	0	0	0	0	0	0	0	0	0	0	0	0	0	0	0	0
203	335257	81.81	71.41	92.2	5.3	0	0	0	0	0	0	0	0	0	0	0	0	0	0	0	0	0	0	0	0	0	0	0	0	0	0	0	0	0	0	0	0	0	0	0	0	0	0	0
204	336909	81.81	71.41	92.2	5.3	0	0	0	0	0	0	0	0	0	0	0	0	0	0	0	0	0	0	0	0	0	0	0	0	0	0	0	0	0	0	0	0	0	0	0	0	0	0	0
205	338560	81.81	71.41	92.2	5.3	0	0	0	0	0	0	0	0	0	0	0	0	0	0	0	0	0	0	0	0	0	0	0	0	0	0	0	0	0	0	0	0	0	0	0	0	0	0	0
206	340212	81.81	71.41	92.2	5.3	0	0	0	0	0	0	0	0	0	0	0	0	0	0	0	0	0	0	0	0	0	0	0	0	0	0	0	0	0	0	0	0	0	0	0	0	0	0	0
207	341863	81.81	71.41	92.2	5.3	0	0	0	0	0	0	0	0	0	0	0	0	0	0	0	0	0	0	0	0	0	0	0	0	0	0	0	0	0	0	0	0	0	0	0	0	0	0	0
208	343515	81.81	71.41	92.2	5.3	0	0	0	0	0	0	0	0	0	0	0	0	0	0	0	0	0	0	0	0	0	0	0	0	0	0	0	0	0	0	0	0	0	0	0	0	0	0	0
209	345166	81.81	71.41	92.2	5.3	0	0	0	0	0	0	0	0	0	0	0	0	0	0	0	0	0	0	0	0	0	0	0	0	0	0	0	0	0	0	0	0	0	0	0	0	0	0	0
210	346818	81.81	71.41	92.2	5.3	0	0	0	0	0	0	0	0	0	0	0	0	0	0	0	0	0	0	0	0	0	0	0	0	0	0	0	0	0	0	0	0	0	0	0	0	0	0	0
211	348470	81.81	71.41	92.2	5.3	0	0	0	0	0	0	0	0	0	0	0	0	0	0	0	0	0	0	0	0	0	0	0	0	0	0	0	0	0	0	0	0	0	0	0	0	0	0	0
212	350121	81.81	71.41	92.2	5.3	0	0	0	0	0	0	0	0	0	0	0	0	0	0	0	0	0	0	0	0	0	0	0	0	0	0	0	0	0	0	0	0	0	0	0	0	0	0	0
213	351773	81.81	71.41	92.2	5.3	0	0	0	0	0	0	0	0	0	0	0	0	0	0	0	0	0	0	0	0	0	0	0	0	0	0	0	0	0	0	0	0	0	0	0	0	0	0	0
214	353424	81.81	71.41	92.2	5.31	0	0	0	0	0	0	0	0	0	0	0	0	0	0	0	0	0	0	0	0	0	0	0	0	0	0	0	0	0	0	0	0	0	0	0	0	0	0	0
215	355076	81.81	71.41	92.2	5.31	0	0	0	0	0	0	0	0	0	0	0	0	0	0	0	0	0	0	0	0	0	0	0	0	0	0	0	0	0	0	0	0	0	0	0	0	0	0	0
216	356727	81.81	71.41	92.2	5.31	0	0	0	0	0	0	0	0	0	0	0	0	0	0	0	0	0	0	0	0	0	0	0	0	0	0	0	0	0	0	0	0	0	0	0	0	0	0	0
217	358379	81.81	71.41	92.2	5.31	0	0	0	0	0	0	0	0	0	0	0	0	0	0	0	0	0	0	0	0	0	0	0	0	0	0	0	0	0	0	0	0	0	0	0	0	0	0	0
218	360030	81.81	71.41	92.2	5.31	0	0	0	0	0	0	0	0	0	0	0	0	0	0	0	0	0	0	0	0	0	0	0	0	0	0	0	0	0	0	0	0	0	0	0	0	0	0	0
219	361682	81.81	71.41	92.2	5.31	0	0	0	0	0	0	0	0	0	0	0	0	0	0	0	0	0	0	0	0	0	0	0	0	0	0	0	0	0	0	0	0	0	0	0	0	0	0	0
220	363333	81.81	71.41	92.2	5.31	0	0	0	0	0	0	0	0	0	0	0	0	0	0	0	0	0	0	0	0	0	0	0	0	0	0	0	0	0	0	0	0	0	0	0	0	0	0	0
221	364985	81.81	71.41	92.2	5.31	0	0	0	0	0	0	0	0	0	0	0	0	0	0	0	0	0	0	0	0	0	0	0	0	0	0	0	0	0	0	0	0	0	0	0	0	0	0	0
222	366636	81.81	71.41	92.2	5.31	0	0	0	0	0	0	0	0	0	0	0	0	0	0	0	0	0	0	0	0	0	0	0	0	0	0	0	0	0	0	0	0	0	0	0	0	0	0	0
223	368288	81.81	71.41	92.2	5.31	0	0	0	0	0	0	0	0	0	0	0	0	0	0	0	0	0	0	0	0	0	0	0	0	0	0	0	0	0	0	0	0	0	0	0	0	0	0	0
224	369939	81.81	71.41	92.21	5.31	0	0	0	0	0	0	0	0	0	0	0	0	0	0	0	0	0	0	0	0	0	0	0	0	0	0	0	0	0	0	0	0	0	0	0	0	0	0	0
225	371591	81.81	71.41	92.21	5.31	0	0	0	0	0	0	0	0	0	0	0	0	0	0	0	0	0	0	0	0	0	0	0	0	0	0	0	0	0	0	0	0	0	0	0	0	0	0	0
226	373242	81.81	71.41	92.21	5.31	0	0	0	0	0	0	0	0	0	0	0	0	0	0	0	0	0	0	0	0	0	0	0	0	0	0	0	0	0	0	0	0	0	0	0	0	0	0	0
227	374894	81.81	71.41	92.21	5.31	0	0	0	0	0	0	0	0	0	0	0	0	0	0	0	0	0	0	0	0	0	0	0	0	0	0	0	0	0	0	0	0	0	0	0	0	0	0	0
228	376545	81.81	71.41	92.21	5.31	0	0	0	0	0	0	0	0	0	0	0	0	0	0	0	0	0	0	0	0	0	0	0	0	0	0	0	0	0	0	0	0	0	0	0	0	0	0	0
229	378197	81.81	71.41	92.21	5.31	0	0	0	0	0	0	0	0	0	0	0	0	0	0	0	0	0	0	0	0	0	0	0	0	0	0	0	0	0	0	0	0	0	0	0	0	0	0	0
230	379848	81.81	71.41	92.21	5.31	0	0	0	0	0	0	0	0	0	0	0	0	0	0	0	0	0	0	0	0	0	0	0	0	0	0	0	0	0	0	0	0	0	0	0	0	0	0	0
231	381500	81.81	71.41	92.21	5.31	0	0	0	0	0	0	0	0	0	0	0	0	0	0	0	0	0	0	0	0	0	0	0	0	0	0	0	0	0	0	0	0	0	0	0	0	0	0	0
232	383151	81.81	71.41	92.21	5.31	0	0	0	0	0	0	0	0	0	0	0	0	0	0	0	0	0	0	0	0	0	0	0	0	0	0	0	0	0	0	0	0	0	0	0	0	0	0	0
233	384803	81.81	71.41	92.21	5.31	0	0	0	0	0	0	0	0	0	0	0	0	0	0	0	0	0	0	0	0	0	0	0	0	0	0	0	0	0	0	0	0	0	0	0	0	0	0	0
234	386454	81.81	71.41	92.21	5.31	0	0	0	0	0	0	0	0	0	0	0	0	0	0	0	0	0	0	0	0	0	0	0	0	0	0	0	0	0	0	0	0	0	0	0	0	0	0	0
235	388106	81.81	71.41	92.21	5.31	0	0	0	0	0	0	0	0	0	0	0	0	0	0	0	0	0	0	0	0	0	0	0	0	0	0	0	0	0	0	0	0	0	0	0	0	0	0	0
236	389757	81.81	71.41	92.21	5.31	0	0	0	0	0	0	0	0	0	0	0	0	0	0	0	0	0	0	0	0	0	0	0	0	0	0	0	0	0	0	0	0	0	0	0	0	0	0	0
237	391409	81.81	71.41	92.21	5.31	0	0	0	0	0	0	0	0	0	0	0	0	0	0	0	0	0	0	0	0	0	0	0	0	0	0	0	0	0	0	0	0	0	0	0	0	0	0	0
238	393060	81.81	71.41	92.21	5.31	0	0	0	0	0	0	0	0	0	0	0	0	0	0	0	0	0	0	0	0	0	0	0	0	0	0	0	0	0	0	0	0	0	0	0	0	0	0	0
239	394712	81.81	71.41	92.21	5.31	0	0	0	0	0	0	0	0	0	0	0	0	0	0	0	0	0	0	0	0	0	0	0	0	0	0	0	0	0	0	0	0	0	0	0	0	0	0	0
240	396363	81.81	71.41	92.21	5.31	0	0	0	0	0	0	0	0	0	0	0	0	0	0	0	0	0	0	0	0	0	0	0	0	0	0	0	0	0	0	0	0	0	0	0	0	0	0	0
241	398015	81.81	71.41	92.21	5.31	0	0	0	0	0	0	0	0	0	0	0	0	0	0	0	0	0	0	0	0	0	0	0	0	0	0	0	0	0	0	0	0	0	0	0	0	0	0	0
242	399666	81.81	71.41	92.21	5.31	0	0	0	0	0	0	0	0	0	0	0	0	0	0	0	0	0	0	0	0	0	0	0	0	0	0	0	0	0	0	0	0	0	0	0	0	0	0	0
243	401318	81.81	71.41	92.21	5.31	0	0	0	0	0	0	0	0	0	0	0	0	0	0	0	0	0	0	0	0	0	0	0	0	0	0	0	0	0	0	0	0	0	0	0	0	0	0	0
244	402969	81.81	71.41	92.21	5.31	0	0	0	0	0	0	0	0	0	0	0	0	0	0	0	0	0	0	0	0	0	0	0	0	0	0	0	0	0	0	0	0	0	0	0	0	0	0	0
245	404621	81.81	71.41	92.21	5.31	0	0	0	0	0	0	0	0	0	0	0	0	0	0	0	0	0	0	0	0	0	0	0	0	0	0	0	0	0	0	0	0	0	0	0	0	0	0	0
246	406273	81.81	71.41	92.21	5.31	0	0	0	0	0	0	0	0	0	0	0	0	0	0	0	0	0	0	0	0	0	0	0	0	0	0	0	0	0	0	0	0	0	0	0	0	0	0	0
247	407924	81.81	71.41	92.21	5.31	0	0	0	0	0	0	0	0	0	0	0	0	0	0	0	0	0	0	0	0	0	0	0	0	0	0	0	0	0	0	0	0	0	0	0	0	0	0	0
248	409576	81.81	71.41	92.21	5.31	0	0	0	0	0	0	0	0	0	0	0	0	0	0	0	0	0	0	0	0	0	0	0	0	0	0	0	0	0	0	0	0	0	0	0	0	0	0	0
249	411227	81.81	71.41	92.21	5.31	0	0	0	0	0	0	0	0	0	0	0	0	0	0	0	0	0	0	0	0	0	0	0	0	0	0	0	0	0	0	0	0	0	0	0	0	0	0	0
250	412879	81.81	71.41	92.21	5.31	0	0	0	0	0	0	0	0	0	0	0	0	0	0	0	0	0	0	0	0	0	0	0	0	0	0	0	0	0	0	0	0	0	0	0	0	0	0	0
251	414530	81.81	71.41	92.21	5.31	0	0	0	0	0	0	0	0	0	0	0	0	0	0	0	0	0	0	0	0	0	0	0	0	0	0	0	0	0	0	0	0	0	0	0	0	0	0	0
252	416182	81.81	71.41	92.21	5.31	0	0	0	0	0	0	0	0	0	0	0	0	0	0	0	0	0	0	0	0	0	0	0	0	0	0	0	0	0	0	0	0	0	0	0	0	0	0	0
253	417833	81.81	71.41	92.21	5.31	0	0	0	0	0	0	0	0	0	0	0	0	0	0	0	0	0	0	0	0	0	0	0	0	0	0	0	0	0	0	0	0	0	0	0	0	0	0	0
254	419485	81.81	71.41	92.21	5.31	0	0	0	0	0	0	0	0	0	0	0	0	0	0	0	0	0	0	0	0	0	0	0	0	0	0	0	0	0	0	0	0	0	0	0	0	0	0	0
255	421136	81.81	71.41	92.21	5.31	0	0	0	0	0	0	0	0	0	0	0	0	0	0	0	0	0	0	0	0	0	0	0	0	0	0	0	0	0	0	0	0	0	0	0	0	0	0	0
256	422788	81.81	71.41	92.21	5.31	0	0	0	0	0	0	0	0	0	0	0	0	0	0	0	0	0	0	0	0	0	0	0	0	0	0	0	0	0	0	0	0	0	0	0	0	0	0	0
257	424439	81.81	71.41	92.21	5.31	0	0	0	0	0	0	0	0	0	0	0	0	0	0	0	0	0	0	0	0	0	0	0	0	0	0	0	0	0	0	0	0	0	0	0	0	0	0	0
258	426091	81.81	71.41	92.21	5.31	0	0	0	0	0	0	0	0	0	0	0	0	0	0	0	0	0	0	0	0	0	0	0	0	0	0	0	0	0	0	0	0	0	0	0	0	0	0	0
259	427742	81.81	71.41	92.21	5.31	0	0	0	0	0	0	0	0	0	0	0	0	0	0	0	0	0	0	0	0	0	0	0	0	0	0	0	0	0	0	0	0	0	0	0	0	0	0	0
260	429394	81.81	71.41	92.21	5.31	0	0	0	0	0	0	0	0	0	0	0	0	0	0	0	0	0	0	0	0	0	0	0	0	0	0	0	0	0	0	0	0	0	0	0	0	0	0	0
261	431045	81.81	71.41	92.21	5.31	0	0	0	0	0	0	0	0	0	0	0	0	0	0	0	0	0	0	0	0	0	0	0	0	0	0	0	0	0	0	0	0	0	0	0	0	0	0	0
262	432697	81.81	71.41	92.21	5.31	0	0	0	0	0	0	0	0	0	0	0	0	0	0	0	0	0	0	0	0	0	0	0	0	0	0	0	0	0	0	0	0	0	0	0	0	0	0	0
263	434348	81.81	71.41	92.21	5.31	0	0	0	0	0	0	0	0	0	0	0	0	0	0	0	0	0	0	0	0	0	0	0	0	0	0	0	0	0	0	0	0	0	0	0	0	0	0	0
264	436000	81.81	71.41	92.21	5.31	0	0	0	0	0	0	0	0	0	0	0	0	0	0	0	0	0	0	0	0	0	0	0	0	0	0	0	0	0	0	0	0	0	0	0	0	0	0	0
265	437651	81.81	71.4	92.21	5.31	0	0	0	0	0	0	0	0	0	0	0	0	0	0	0	0	0	0	0	0	0	0	0	0	0	0	0	0	0	0	0	0	0	0	0	0	0	0	0
266	439303	81.81	71.4	92.21	5.31	0	0	0	0	0	0	0	0	0	0	0	0	0	0	0	0	0	0	0	0	0	0	0	0	0	0	0	0	0	0	0	0	0	0	0	0	0	0	0
267	440954	81.81	71.4	92.21	5.31	0	0	0	0	0	0	0	0	0	0	0	0	0	0	0	0	0	0	0	0	0	0	0	0	0	0	0	0	0	0	0	0	0	0	0	0	0	0	0
268	442606	81.81	71.4	92.21	5.31	0	0	0	0	0	0	0	0	0	0	0	0	0	0	0	0	0	0	0	0	0	0	0	0	0	0	0	0	0	0	0	0	0	0	0	0	0	0	0
269	444257	81.81	71.4	92.21	5.31	0	0	0	0	0	0	0	0	0	0	0	0	0	0	0	0	0	0	0	0	0	0	0	0	0	0	0	0	0	0	0	0	0	0	0	0	0	0	0
270	445909	81.81	71.4	92.21	5.31	0	0	0	0	0	0	0	0	0	0	0	0	0	0	0	0	0	0	0	0	0	0	0	0	0	0	0	0	0	0	0	0	0	0	0	0	0	0	0
271	447560	81.81	71.4	92.21	5.31	0	0	0	0	0	0	0	0	0	0	0	0	0	0	0	0	0	0	0	0	0	0	0	0	0	0	0	0	0	0	0	0	0	0	0	0	0	0	0
272	449212	81.81	71.4	92.21	5.31	0	0	0	0	0	0	0	0	0	0	0	0	0	0	0	0	0	0	0	0	0	0	0	0	0	0	0	0	0	0	0	0	0	0	0	0	0	0	0
273	450863	81.81	71.4	92.21	5.31	0	0	0	0	0	0	0	0	0	0	0	0	0	0	0	0	0	0	0	0	0	0	0	0	0	0	0	0	0	0	0	0	0	0	0	0	0	0	0
274	452515	81.81	71.4	92.21	5.31	0	0	0	0	0	0	0	0	0	0	0	0	0	0	0	0	0	0	0	0	0	0	0	0	0	0	0	0	0	0	0	0	0	0	0	0	0	0	0
275	454166	81.81	71.4	92.21	5.31	0	0	0	0	0	0	0	0	0	0	0	0	0	0	0	0	0	0	0	0	0	0	0	0	0	0	0	0	0	0	0	0	0	0	0	0	0	0	0
276	455818	81.81	71.4	92.21	5.31	0	0	0	0	0	0	0	0	0	0	0	0	0	0	0	0	0	0	0	0	0	0	0	0	0	0	0	0	0	0	0	0	0	0	0	0	0	0	0
277	457469	81.81	71.4	92.21	5.31	0	0	0	0	0	0	0	0	0	0	0	0	0	0	0	0	0	0	0	0	0	0	0	0	0	0	0	0	0	0	0	0	0	0	0	0	0	0	0
278	459121	81.81	71.4	92.21	5.31	0	0	0	0	0	0	0	0	0	0	0	0	0	0	0	0	0	0	0	0	0	0	0	0	0	0	0	0	0	0	0	0	0	0	0	0	0	0	0
279	460772	81.81	71.4	92.21	5.31	0	0	0	0	0	0	0	0	0	0	0	0	0	0	0	0	0	0	0	0	0	0	0	0	0	0	0	0	0	0	0	0	0	0	0	0	0	0	0
280	462424	81.81	71.4	92.21	5.31	0	0	0	0	0	0	0	0	0	0	0	0	0	0	0	0	0	0	0	0	0	0	0	0	0	0	0	0	0	0	0	0	0	0	0	0	0	0	0
281	464076	81.81	71.4	92.21	5.31	0	0	0	0	0	0	0	0	0	0	0	0	0	0	0	0	0	0	0	0	0	0	0	0	0	0	0	0	0	0	0	0	0	0	0	0	0	0	0
282	465727	81.81	71.4	92.21	5.31	0	0	0	0	0	0	0	0	0	0	0	0	0	0	0	0	0	0	0	0	0	0	0	0	0	0	0	0	0	0	0	0	0	0	0	0	0	0	0
283	467379	81.81	71.4	92.21	5.31	0	0	0	0	0	0	0	0	0	0	0	0	0	0	0	0	0	0	0	0	0	0	0	0	0	0	0	0	0	0	0	0	0	0	0	0	0	0	0
284	469030	81.81	71.4	92.21	5.31	0	0	0	0	0	0	0	0	0	0	0	0	0	0	0	0	0	0	0	0	0	0	0	0	0	0	0	0	0	0	0	0	0	0	0	0	0	0	0
285	470682	81.81	71.4	92.21	5.31	0	0	0	0	0	0	0	0	0	0	0	0	0	0	0	0	0	0	0	0	0	0	0	0	0	0	0	0	0	0	0	0	0	0	0	0	0	0	0
286	472333	81.81	71.4	92.21	5.31	0	0	0	0	0	0	0	0	0	0	0	0	0	0	0	0	0	0	0	0	0	0	0	0	0	0	0	0	0	0	0	0	0	0	0	0	0	0	0
287	473985	81.81	71.4	92.21	5.31	0	0	0	0	0	0	0	0	0	0	0	0	0	0	0	0	0	0	0	0	0	0	0	0	0	0	0	0	0	0	0	0	0	0	0	0	0	0	0
288	475636	81.81	71.4	92.21	5.31	0	0	0	0	0	0	0	0	0	0	0	0	0	0	0	0	0	0	0	0	0	0	0	0	0	0	0	0	0	0	0	0	0	0	0	0	0	0	0
289	477288	81.81	71.4	92.21	5.31	0	0	0	0	0	0	0	0	0	0	0	0	0	0	0	0	0	0	0	0	0	0	0	0	0	0	0	0	0	0	0	0	0	0	0	0	0	0	0
290	478939	81.81	71.4	92.21	5.31	0	0	0	0	0	0	0	0	0	0	0	0	0	0	0	0	0	0	0	0	0	0	0	0	0	0	0	0	0	0	0	0	0	0	0	0	0	0	0
291	480591	81.81	71.4	92.21	5.31	0	0	0	0	0	0	0	0	0	0	0	0	0	0	0	0	0	0	0	0	0	0	0	0	0	0	0	0	0	0	0	0	0	0	0	0	0	0	0
292	482242	81.81	71.4	92.21	5.31	0	0	0	0	0	0	0	0	0	0	0	0	0	0	0	0	0	0	0	0	0	0	0	0	0	0	0	0	0	0	0	0	0	0	0	0	0	0	0
293	483894	81.81	71.4	92.21	5.31	0	0	0	0	0	0	0	0	0	0	0	0	0	0	0	0	0	0	0	0	0	0	0	0	0	0	0	0	0	0	0	0	0	0	0	0	0	0	0
294	485545	81.81	71.4	92.21	5.31	0	0	0	0	0	0	0	0	0	0	0	0	0	0	0	0	0	0	0	0	0	0	0	0	0	0	0	0	0	0	0	0	0	0	0	0	0	0	0
295	487197	81.81	71.4	92.21	5.31	0	0	0	0	0	0	0	0	0	0	0	0	0	0	0	0	0	0	0	0	0	0	0	0	0	0	0	0	0	0	0	0	0	0	0	0	0	0	0
296	488848	81.81	71.4	92.21	5.31	0	0	0	0	0	0	0	0	0	0	0	0	0	0	0	0	0	0	0	0	0	0	0	0	0	0	0	0	0	0	0	0	0	0	0	0	0	0	0
297	490500	81.81	71.4	92.21	5.31	0	0	0	0	0	0	0	0	0	0	0	0	0	0	0	0	0	0	0	0	0	0	0	0	0	0	0	0	0	0	0	0	0	0	0	0	0	0	0
298	492151	81.81	71.4	92.21	5.31	0	0	0	0	0	0	0	0	0	0	0	0	0	0	0	0	0	0	0	0	0	0	0	0	0	0	0	0	0	0	0	0	0	0	0	0	0	0	0
299	493803	81.81	71.4	92.21	5.31	0	0	0	0	0	0	0	0	0	0	0	0	0	0	0	0	0	0	0	0	0	0	0	0	0	0	0	0	0	0	0	0	0	0	0	0	0	0	0
300	495454	81.81	71.4	92.21	5.31	0	0	0	0	0	0	0	0	0	0	0	0	0	0	0	0	0	0	0	0	0	0	0	0	0	0	0	0	0	0	0	0	0	0	0	0	0	0	0
301	497106	81.81	71.4	92.21	5.31	0	0	0	0	0	0	0	0	0	0	0	0	0	0	0	0	0	0	0	0	0	0	0	0	0	0	0	0	0	0	0	0	0	0	0	0	0	0	0
302	498757	81.81	71.4	92.21	5.31	0	0	0	0	0	0	0	0	0	0	0	0	0	0	0	0	0	0	0	0	0	0	0	0	0	0	0	0	0	0	0	0	0	0	0	0	0	0	0
303	500409	81.81	71.4	92.21	5.31	0	0	0	0	0	0	0	0	0	0	0	0	0	0	0	0	0	0	0	0	0	0	0	0	0	0	0	0	0	0	0	0	0	0	0	0	0	0	0
304	502060	81.81	71.4	92.21	5.31	0	0	0	0	0	0	0	0	0	0	0	0	0	0	0	0	0	0	0	0	0	0	0	0	0	0	0	0	0	0	0	0	0	0	0	0	0	0	0
305	503712	81.81	71.4	92.21	5.31	0	0	0	0	0	0	0	0	0	0	0	0	0	0	0	0	0	0	0	0	0	0	0	0	0	0	0	0	0	0	0	0	0	0	0	0	0	0	0
306	505363	81.81	71.4	92.21	5.31	0	0	0	0	0	0	0	0	0	0	0	0	0	0	0	0	0	0	0	0	0	0	0	0	0	0	0	0	0	0	0	0	0	0	0	0	0	0	0
307	507015	81.81	71.4	92.21	5.31	0	0	0	0	0	0	0	0	0	0	0	0	0	0	0	0	0	0	0	0	0	0	0	0	0	0	0	0	0	0	0	0	0	0	0	0	0	0	0
308	508666	81.81	71.4	92.21	5.31	0	0	0	0	0	0	0	0	0	0	0	0	0	0	0	0	0	0	0	0	0	0	0	0	0	0	0	0	0	0	0	0	0	0	0	0	0	0	0
309	510318	81.81	71.4	92.21	5.31	0	0	0	0	0	0	0	0	0	0	0	0	0	0	0	0	0	0	0	0	0	0	0	0	0	0	0	0	0	0	0	0	0	0	0	0	0	0	0
310	511969	81.81	71.4	92.21	5.31	0	0	0	0	0	0	0	0	0	0	0	0	0	0	0	0	0	0	0	0	0	0	0	0	0	0	0	0	0	0	0	0	0	0	0	0	0	0	0
311	513621	81.81	71.4	92.21	5.31	0	0	0	0	0	0	0	0	0	0	0	0	0	0	0	0	0	0	0	0	0	0	0	0	0	0	0	0	0	0	0	0	0	0	0	0	0	0	0
312	515272	81.81	71.4	92.21	5.31	0	0	0	0	0	0	0	0	0	0	0	0	0	0	0	0	0	0	0	0	0	0	0	0	0	0	0	0	0	0	0	0	0	0	0	0	0	0	0
313	516924	81.81	71.4	92.21	5.31	0	0	0	0	0	0	0	0	0	0	0	0	0	0	0	0	0	0	0	0	0	0	0	0	0	0	0	0	0	0	0	0	0	0	0	0	0	0	0
314	518575	81.81	71.4	92.21	5.31	0	0	0	0	0	0	0	0	0	0	0	0	0	0	0	0	0	0	0	0	0	0	0	0	0	0	0	0	0	0	0	0	0	0	0	0	0	0	0
315	520227	81.81	71.4	92.21	5.31	0	0	0	0	0	0	0	0	0	0	0	0	0	0	0	0	0	0	0	0	0	0	0	0	0	0	0	0	0	0	0	0	0	0	0	0	0	0	0
316	521879	81.81	71.4	92.21	5.31	0	0	0	0	0	0	0	0	0	0	0	0	0	0	0	0	0	0	0	0	0	0	0	0	0	0	0	0	0	0	0	0	0	0	0	0	0	0	0
317	523530	81.81	71.4	92.21	5.31	0	0	0	0	0	0	0	0	0	0	0	0	0	0	0	0	0	0	0	0	0	0	0	0	0	0	0	0	0	0	0	0	0	0	0	0	0	0	0
318	525182	81.81	71.4	92.21	5.31	0	0	0	0	0	0	0	0	0	0	0	0	0	0	0	0	0	0	0	0	0	0	0	0	0	0	0	0	0	0	0	0	0	0	0	0	0	0	0
319	526833	81.81	71.4	92.21	5.31	0	0	0	0	0	0	0	0	0	0	0	0	0	0	0	0	0	0	0	0	0	0	0	0	0	0	0	0	0	0	0	0	0	0	0	0	0	0	0
320	528485	81.81	71.4	92.21	5.31	0	0	0	0	0	0	0	0	0	0	0	0	0	0	0	0	0	0	0	0	0	0	0	0	0	0	0	0	0	0	0	0	0	0	0	0	0	0	0
321	530136	81.81	71.4	92.21	5.31	0	0	0	0	0	0	0	0	0	0	0	0	0	0	0	0	0	0	0	0	0	0	0	0	0	0	0	0	0	0	0	0	0	0	0	0	0	0	0
322	531788	81.81	71.4	92.21	5.31	0	0	0	0	0	0	0	0	0	0	0	0	0	0	0	0	0	0	0	0	0	0	0	0	0	0	0	0	0	0	0	0	0	0	0	0	0	0	0
323	533439	81.81	71.4	92.21	5.31	0	0	0	0	0	0	0	0	0	0	0	0	0	0	0	0	0	0	0	0	0	0	0	0	0	0	0	0	0	0	0	0	0	0	0	0	0	0	0
324	535091	81.81	71.4	92.21	5.31	0	0	0	0	0	0	0	0	0	0	0	0	0	0	0	0	0	0	0	0	0	0	0	0	0	0	0	0	0	0	0	0	0	0	0	0	0	0	0
325	536742	81.81	71.4	92.21	5.31	0	0	0	0	0	0	0	0	0	0	0	0	0	0	0	0	0	0	0	0	0	0	0	0	0	0	0	0	0	0	0	0	0	0	0	0	0	0	0
326	538394	81.81	71.4	92.21	5.31	0	0	0	0	0	0	0	0	0	0	0	0	0	0	0	0	0	0	0	0	0	0	0	0	0	0	0	0	0	0	0	0	0	0	0	0	0	0	0
327	540045	81.81	71.4	92.21	5.31	0	0	0	0	0	0	0	0	0	0	0	0	0	0	0	0	0	0	0	0	0	0	0	0	0	0	0	0	0	0	0	0	0	0	0	0	0	0	0
328	541697	81.81	71.4	92.21	5.31	0	0	0	0	0	0	0	0	0	0	0	0	0	0	0	0	0	0	0	0	0	0	0	0	0	0	0	0	0	0	0	0	0	0	0	0	0	0	0
329	543348	81.81	71.4	92.21	5.31	0	0	0	0	0	0	0	0	0	0	0	0	0	0	0	0	0	0	0	0	0	0	0	0	0	0	0	0	0	0	0	0	0	0	0	0	0	0	0
330	545000	81.81	71.4	92.21	5.31	0	0	0	0	0	0	0	0	0	0	0	0	0	0	0	0	0	0	0	0	0	0	0	0	0	0	0	0	0	0	0	0	0	0	0	0	0	0	0
331	546651	81.81	71.4	92.21	5.31	0	0	0	0	0	0	0	0	0	0	0	0	0	0	0	0	0	0	0	0	0	0	0	0	0	0	0	0	0	0	0	0	0	0	0	0	0	0	0
332	548303	81.81	71.4	92.21	5.31	0	0	0	0	0	0	0	0	0	0	0	0	0	0	0	0	0	0	0	0	0	0	0	0	0	0	0	0	0	0	0	0	0	0	0	0	0	0	0
333	549954	81.81	71.4	92.21	5.31	0	0	0	0	0	0	0	0	0	0	0	0	0	0	0	0	0	0	0	0	0	0	0	0	0	0	0	0	0	0	0	0	0	0	0	0	0	0	0
334	551606	81.81	71.4	92.21	5.31	0	0	0	0	0	0	0	0	0	0	0	0	0	0	0	0	0	0	0	0	0	0	0	0	0	0	0	0	0	0	0	0	0	0	0	0	0	0	0
335	553257	81.81	71.4	92.21	5.31	0	0	0	0	0	0	0	0	0	0	0	0	0	0	0	0	0	0	0	0	0	0	0	0	0	0	0	0	0	0	0	0	0	0	0	0	0	0	0
336	554909	81.81	71.4	92.21	5.31	0	0	0	0	0	0	0	0	0	0	0	0	0	0	0	0	0	0	0	0	0	0	0	0	0	0	0	0	0	0	0	0	0	0	0	0	0	0	0
337	556560	81.81	71.4	92.21	5.31	0	0	0	0	0	0	0	0	0	0	0	0	0	0	0	0	0	0	0	0	0	0	0	0	0	0	0	0	0	0	0	0	0	0	0	0	0	0	0
338	558212	81.81	71.4	92.21	5.31	0	0	0	0	0	0	0	0	0	0	0	0	0	0	0	0	0	0	0	0	0	0	0	0	0	0	0	0	0	0	0	0	0	0	0	0	0	0	0
339	559863	81.81	71.4	92.21	5.31	0	0	0	0	0	0	0	0	0	0	0	0	0	0	0	0	0	0	0	0	0	0	0	0	0	0	0	0	0	0	0	0	0	0	0	0	0	0	0
340	561515	81.81	71.4	92.21	5.31	0	0	0	0	0	0	0	0	0	0	0	0	0	0	0	0	0	0	0	0	0	0	0	0	0	0	0	0	0	0	0	0	0	0	0	0	0	0	0
341	563166	81.81	71.4	92.21	5.31	0	0	0	0	0	0	0	0	0	0	0	0	0	0	0	0	0	0	0	0	0	0	0	0	0	0	0	0	0	0	0	0	0	0	0	0	0	0	0
342	564818	81.81	71.4	92.21	5.31	0	0	0	0	0	0	0	0	0	0	0	0	0	0	0	0	0	0	0	0	0	0	0	0	0	0	0	0	0	0	0	0	0	0	0	0	0	0	0
343	566469	81.81	71.4	92.21	5.31	0	0	0	0	0	0	0	0	0	0	0	0	0	0	0	0	0	0	0	0	0	0	0	0	0	0	0	0	0	0	0	0	0	0	0	0	0	0	0
344	568121	81.81	71.4	92.21	5.31	0	0	0	0	0	0	0	0	0	0	0	0	0	0	0	0	0	0	0	0	0	0	0	0	0	0	0	0	0	0	0	0	0	0	0	0	0	0	0
345	569772	81.81	71.4	92.21	5.31	0	0	0	0	0	0	0	0	0	0	0	0	0	0	0	0	0	0	0	0	0	0	0	0	0	0	0	0	0	0	0	0	0	0	0	0	0	0	0
346	571424	81.81	71.4	92.21	5.31	0	0	0	0	0	0	0	0	0	0	0	0	0	0	0	0	0	0	0	0	0	0	0	0	0	0	0	0	0	0	0	0	0	0	0	0	0	0	0
347	573075	81.81	71.4	92.21	5.31	0	0	0	0	0	0	0	0	0	0	0	0	0	0	0	0	0	0	0	0	0	0	0	0	0	0	0	0	0	0	0	0	0	0	0	0	0	0	0
348	574727	81.81	71.4	92.21	5.31	0	0	0	0	0	0	0	0	0	0	0	0	0	0	0	0	0	0	0	0	0	0	0	0	0	0	0	0	0	0	0	0	0	0	0	0	0	0	0
349	576378	81.81	71.4	92.21	5.31	0	0	0	0	0	0	0	0	0	0	0	0	0	0	0	0	0	0	0	0	0	0	0	0	0	0	0	0	0	0	0	0	0	0	0	0	0	0	0
350	578030	81.81	71.4	92.21	5.31	0	0	0	0	0	0	0	0	0	0	0	0	0	0	0	0	0	0	0	0	0	0	0	0	0	0	0	0	0	0	0	0	0	0	0	0	0	0	0
351	579682	81.81	71.4	92.21	5.31	0	0	0	0	0	0	0	0	0	0	0	0	0	0	0	0	0	0	0	0	0	0	0	0	0	0	0	0	0	0	0	0	0	0	0	0	0	0	0
352	581333	81.81	71.4	92.21	5.31	0	0	0	0	0	0	0	0	0	0	0	0	0	0	0	0	0	0	0	0	0	0	0	0	0	0	0	0	0	0	0	0	0	0	0	0	0	0	0
353	582985	81.81	71.4	92.21	5.31	0	0	0	0	0	0	0	0	0	0	0	0	0	0	0	0	0	0	0	0	0	0	0	0	0	0	0	0	0	0	0	0	0	0	0	0	0	0	0
354	584636	81.81	71.4	92.21	5.31	0	0	0	0	0	0	0	0	0	0	0	0	0	0	0	0	0	0	0	0	0	0	0	0	0	0	0	0	0	0	0	0	0	0	0	0	0	0	0
355	586288	81.81	71.4	92.21	5.31	0	0	0	0	0	0	0	0	0	0	0	0	0	0	0	0	0	0	0	0	0	0	0	0	0	0	0	0	0	0	0	0	0	0	0	0	0	0	0
356	587939	81.81	71.4	92.21	5.31	0	0	0	0	0	0	0	0	0	0	0	0	0	0	0	0	0	0	0	0	0	0	0	0	0	0	0	0	0	0	0	0	0	0	0	0	0	0	0
357	589591	81.81	71.4	92.21	5.31	0	0	0	0	0	0	0	0	0	0	0	0	0	0	0	0	0	0	0	0	0	0	0	0	0	0	0	0	0	0	0	0	0	0	0	0	0	0	0
358	591242	81.81	71.4	92.21	5.31	0	0	0	0	0	0	0	0	0	0	0	0	0	0	0	0	0	0	0	0	0	0	0	0	0	0	0	0	0	0	0	0	0	0	0	0	0	0	0
359	592894	81.81	71.4	92.21	5.31	0	0	0	0	0	0	0	0	0	0	0	0	0	0	0	0	0	0	0	0	0	0	0	0	0	0	0	0	0	0	0	0	0	0	0	0	0	0	0
360	594545	81.81	71.4	92.21	5.31	0	0	0	0	0	0	0	0	0	0	0	0	0	0	0	0	0	0	0	0	0	0	0	0	0	0	0	0	0	0	0	0	0	0	0	0	0	0	0
361	596197	81.81	71.4	92.21	5.31	0	0	0	0	0	0	0	0	0	0	0	0	0	0	0	0	0	0	0	0	0	0	0	0	0	0	0	0	0	0	0	0	0	0	0	0	0	0	0
362	597848	81.81	71.4	92.21	5.31	0	0	0	0	0	0	0	0	0	0	0	0	0	0	0	0	0	0	0	0	0	0	0	0	0	0	0	0	0	0	0	0	0	0	0	0	0	0	0
363	599500	81.81	71.4	92.21	5.31	0	0	0	0	0	0	0	0	0	0	0	0	0	0	0	0	0	0	0	0	0	0	0	0	0	0	0	0	0	0	0	0	0	0	0	0	0	0	0
364	601151	81.81	71.4	92.21	5.31	0	0	0	0	0	0	0	0	0	0	0	0	0	0	0	0	0	0	0	0	0	0	0	0	0	0	0	0	0	0	0	0	0	0	0	0	0	0	0
365	602803	81.81	71.4	92.21	5.31	0	0	0	0	0	0	0	0	0	0	0	0	0	0	0	0	0	0	0	0	0	0	0	0	0	0	0	0	0	0	0	0	0	0	0	0	0	0	0
366	604454	81.81	71.4	92.21	5.31	0	0	0	0	0	0	0	0	0	0	0	0	0	0	0	0	0	0	0	0	0	0	0	0	0	0	0	0	0	0	0	0	0	0	0	0	0	0	0
367	606106	81.81	71.4	92.21	5.31	0	0	0	0	0	0	0	0	0	0	0	0	0	0	0	0	0	0	0	0	0	0	0	0	0	0	0	0	0	0	0	0	0	0	0	0	0	0	0
368	607757	81.81	71.4	92.21	5.31	0	0	0	0	0	0	0	0	0	0	0	0	0	0	0	0	0	0	0	0	0	0	0	0	0	0	0	0	0	0	0	0	0	0	0	0	0	0	0
369	609409	81.81	71.4	92.21	5.31	0	0	0	0	0	0	0	0	0	0	0	0	0	0	0	0	0	0	0	0	0	0	0	0	0	0	0	0	0	0	0	0	0	0	0	0	0	0	0
370	611060	81.81	71.4	92.21	5.31	0	0	0	0	0	0	0	0	0	0	0	0	0	0	0	0	0	0	0	0	0	0	0	0	0	0	0	0	0	0	0	0	0	0	0	0	0	0	0
371	612712	81.81	71.4	92.21	5.31	0	0	0	0	0	0	0	0	0	0	0	0	0	0	0	0	0	0	0	0	0	0	0	0	0	0	0	0	0	0	0	0	0	0	0	0	0	0	0
372	614363	81.81	71.4	92.21	5.31	0	0	0	0	0	0	0	0	0	0	0	0	0	0	0	0	0	0	0	0	0	0	0	0	0	0	0	0	0	0	0	0	0	0	0	0	0	0	0
373	616015	81.81	71.4	92.21	5.31	0	0	0	0	0	0	0	0	0	0	0	0	0	0	0	0	0	0	0	0	0	0	0	0	0	0	0	0	0	0	0	0	0	0	0	0	0	0	0
374	617666	81.81	71.4	92.21	5.31	0	0	0	0	0	0	0	0	0	0	0	0	0	0	0	0	0	0	0	0	0	0	0	0	0	0	0	0	0	0	0	0	0	0	0	0	0	0	0
375	619318	81.81	71.4	92.21	5.31	0	0	0	0	0	0	0	0	0	0	0	0	0	0	0	0	0	0	0	0	0	0	0	0	0	0	0	0	0	0	0	0	0	0	0	0	0	0	0
376	620969	81.81	71.4	92.21	5.31	0	0	0	0	0	0	0	0	0	0	0	0	0	0	0	0	0	0	0	0	0	0	0	0	0	0	0	0	0	0	0	0	0	0	0	0	0	0	0
377	622621	81.81	71.4	92.21	5.31	0	0	0	0	0	0	0	0	0	0	0	0	0	0	0	0	0	0	0	0	0	0	0	0	0	0	0	0	0	0	0	0	0	0	0	0	0	0	0
378	624272	81.81	71.4	92.21	5.31	0	0	0	0	0	0	0	0	0	0	0	0	0	0	0	0	0	0	0	0	0	0	0	0	0	0	0	0	0	0	0	0	0	0	0	0	0	0	0
379	625924	81.81	71.4	92.21	5.31	0	0	0	0	0	0	0	0	0	0	0	0	0	0	0	0	0	0	0	0	0	0	0	0	0	0	0	0	0	0	0	0	0	0	0	0	0	0	0
380	627575	81.81	71.4	92.21	5.31	0	0	0	0	0	0	0	0	0	0	0	0	0	0	0	0	0	0	0	0	0	0	0	0	0	0	0	0	0	0	0	0	0	0	0	0	0	0	0
381	629227	81.81	71.4	92.21	5.31	0	0	0	0	0	0	0	0	0	0	0	0	0	0	0	0	0	0	0	0	0	0	0	0	0	0	0	0	0	0	0	0	0	0	0	0	0	0	0
382	630878	81.81	71.4	92.21	5.31	0	0	0	0	0	0	0	0	0	0	0	0	0	0	0	0	0	0	0	0	0	0	0	0	0	0	0	0	0	0	0	0	0	0	0	0	0	0	0
383	632530	81.81	71.4	92.21	5.31	0	0	0	0	0	0	0	0	0	0	0	0	0	0	0	0	0	0	0	0	0	0	0	0	0	0	0	0	0	0	0	0	0	0	0	0	0	0	0
384	634181	81.81	71.4	92.21	5.31	0	0	0	0	0	0	0	0	0	0	0	0	0	0	0	0	0	0	0	0	0	0	0	0	0	0	0	0	0	0	0	0	0	0	0	0	0	0	0
385	635833	81.81	71.4	92.21	5.31	0	0	0	0	0	0	0	0	0	0	0	0	0	0	0	0	0	0	0	0	0	0	0	0	0	0	0	0	0	0	0	0	0	0	0	0	0	0	0
386	637485	81.81	71.4	92.21	5.31	0	0	0	0	0	0	0	0	0	0	0	0	0	0	0	0	0	0	0	0	0	0	0	0	0	0	0	0	0	0	0	0	0	0	0	0	0	0	0
387	639136	81.81	71.4	92.21	5.31	0	0	0	0	0	0	0	0	0	0	0	0	0	0	0	0	0	0	0	0	0	0	0	0	0	0	0	0	0	0	0	0	0	0	0	0	0	0	0
388	640788	81.81	71.4	92.21	5.31	0	0	0	0	0	0	0	0	0	0	0	0	0	0	0	0	0	0	0	0	0	0	0	0	0	0	0	0	0	0	0	0	0	0	0	0	0	0	0
389	642439	81.81	71.4	92.21	5.31	0	0	0	0	0	0	0	0	0	0	0	0	0	0	0	0	0	0	0	0	0	0	0	0	0	0	0	0	0	0	0	0	0	0	0	0	0	0	0
390	644091	81.81	71.4	92.21	5.31	0	0	0	0	0	0	0	0	0	0	0	0	0	0	0	0	0	0	0	0	0	0	0	0	0	0	0	0	0	0	0	0	0	0	0	0	0	0	0
391	645742	81.81	71.4	92.21	5.31	0	0	0	0	0	0	0	0	0	0	0	0	0	0	0	0	0	0	0	0	0	0	0	0	0	0	0	0	0	0	0	0	0	0	0	0	0	0	0
392	647394	81.81	71.4	92.21	5.31	0	0	0	0	0	0	0	0	0	0	0	0	0	0	0	0	0	0	0	0	0	0	0	0	0	0	0	0	0	0	0	0	0	0	0	0	0	0	0
393	649045	81.81	71.4	92.21	5.31	0	0	0	0	0	0	0	0	0	0	0	0	0	0	0	0	0	0	0	0	0	0	0	0	0	0	0	0	0	0	0	0	0	0	0	0	0	0	0
394	650697	81.81	71.4	92.21	5.31	0	0	0	0	0	0	0	0	0	0	0	0	0	0	0	0	0	0	0	0	0	0	0	0	0	0	0	0	0	0	0	0	0	0	0	0	0	0	0
395	652348	81.81	71.4	92.21	5.31	0	0	0	0	0	0	0	0	0	0	0	0	0	0	0	0	0	0	0	0	0	0	0	0	0	0	0	0	0	0	0	0	0	0	0	0	0	0	0
396	654000	81.81	71.4	92.21	5.31	0	0	0	0	0	0	0	0	0	0	0	0	0	0	0	0	0	0	0	0	0	0	0	0	0	0	0	0	0	0	0	0	0	0	0	0	0	0	0
397	655651	81.81	71.4	92.21	5.31	0	0	0	0	0	0	0	0	0	0	0	0	0	0	0	0	0	0	0	0	0	0	0	0	0	0	0	0	0	0	0	0	0	0	0	0	0	0	0
398	657303	81.81	71.4	92.21	5.31	0	0	0	0	0	0	0	0	0	0	0	0	0	0	0	0	0	0	0	0	0	0	0	0	0	0	0	0	0	0	0	0	0	0	0	0	0	0	0
399	658954	81.81	71.4	92.21	5.31	0	0	0	0	0	0	0	0	0	0	0	0	0	0	0	0	0	0	0	0	0	0	0	0	0	0	0	0	0	0	0	0	0	0	0	0	0	0	0
400	660606	81.81	71.4	92.21	5.31	0	0	0	0	0	0	0	0	0	0	0	0	0	0	0	0	0	0	0	0	0	0	0	0	0	0	0	0	0	0	0	0	0	0	0	0	0	0	0
401	662257	81.81	71.4	92.21	5.31	0	0	0	0	0	0	0	0	0	0	0	0	0	0	0	0	0	0	0	0	0	0	0	0	0	0	0	0	0	0	0	0	0	0	0	0	0	0	0
402	663909	81.81	71.4	92.21	5.31	0	0	0	0	0	0	0	0	0	0	0	0	0	0	0	0	0	0	0	0	0	0	0	0	0	0	0	0	0	0	0	0	0	0	0	0	0	0	0
403	665560	81.81	71.4	92.21	5.31	0	0	0	0	0	0	0	0	0	0	0	0	0	0	0	0	0	0	0	0	0	0	0	0	0	0	0	0	0	0	0	0	0	0	0	0	0	0	0
404	667212	81.81	71.4	92.21	5.31	0	0	0	0	0	0	0	0	0	0	0	0	0	0	0	0	0	0	0	0	0	0	0	0	0	0	0	0	0	0	0	0	0	0	0	0	0	0	0
405	668863	81.81	71.4	92.21	5.31	0	0	0	0	0	0	0	0	0	0	0	0	0	0	0	0	0	0	0	0	0	0	0	0	0	0	0	0	0	0	0	0	0	0	0	0	0	0	0
406	670515	81.81	71.4	92.21	5.31	0	0	0	0	0	0	0	0	0	0	0	0	0	0	0	0	0	0	0	0	0	0	0	0	0	0	0	0	0	0	0	0	0	0	0	0	0	0	0
407	672166	81.81	71.4	92.21	5.31	0	0	0	0	0	0	0	0	0	0	0	0	0	0	0	0	0	0	0	0	0	0	0	0	0	0	0	0	0	0	0	0	0	0	0	0	0	0	0
408	673818	81.81	71.4	92.21	5.31	0	0	0	0	0	0	0	0	0	0	0	0	0	0	0	0	0	0	0	0	0	0	0	0	0	0	0	0	0	0	0	0	0	0	0	0	0	0	0
409	675469	81.81	71.4	92.21	5.31	0	0	0	0	0	0	0	0	0	0	0	0	0	0	0	0	0	0	0	0	0	0	0	0	0	0	0	0	0	0	0	0	0	0	0	0	0	0	0
410	677121	81.81	71.4	92.21	5.31	0	0	0	0	0	0	0	0	0	0	0	0	0	0	0	0	0	0	0	0	0	0	0	0	0	0	0	0	0	0	0	0	0	0	0	0	0	0	0
411	678772	81.81	71.4	92.21	5.31	0	0	0	0	0	0	0	0	0	0	0	0	0	0	0	0	0	0	0	0	0	0	0	0	0	0	0	0	0	0	0	0	0	0	0	0	0	0	0
412	680424	81.81	71.4	92.21	5.31	0	0	0	0	0	0	0	0	0	0	0	0	0	0	0	0	0	0	0	0	0	0	0	0	0	0	0	0	0	0	0	0	0	0	0	0	0	0	0
413	682075	81.81	71.4	92.21	5.31	0	0	0	0	0	0	0	0	0	0	0	0	0	0	0	0	0	0	0	0	0	0	0	0	0	0	0	0	0	0	0	0	0	0	0	0	0	0	0
414	683727	81.81	71.4	92.21	5.31	0	0	0	0	0	0	0	0	0	0	0	0	0	0	0	0	0	0	0	0	0	0	0	0	0	0	0	0	0	0	0	0	0	0	0	0	0	0	0
415	685378	81.81	71.4	92.21	5.31	0	0	0	0	0	0	0	0	0	0	0	0	0	0	0	0	0	0	0	0	0	0	0	0	0	0	0	0	0	0	0	0	0	0	0	0	0	0	0
416	687030	81.81	71.4	92.21	5.31	0	0	0	0	0	0	0	0	0	0	0	0	0	0	0	0	0	0	0	0	0	0	0	0	0	0	0	0	0	0	0	0	0	0	0	0	0	0	0
417	688681	81.81	71.4	92.21	5.31	0	0	0	0	0	0	0	0	0	0	0	0	0	0	0	0	0	0	0	0	0	0	0	0	0	0	0	0	0	0	0	0	0	0	0	0	0	0	0
418	690333	81.81	71.4	92.21	5.31	0	0	0	0	0	0	0	0	0	0	0	0	0	0	0	0	0	0	0	0	0	0	0	0	0	0	0	0	0	0	0	0	0	0	0	0	0	0	0
419	691984	81.81	71.4	92.21	5.31	0	0	0	0	0	0	0	0	0	0	0	0	0	0	0	0	0	0	0	0	0	0	0	0	0	0	0	0	0	0	0	0	0	0	0	0	0	0	0
420	693636	81.81	71.4	92.21	5.31	0	0	0	0	0	0	0	0	0	0	0	0	0	0	0	0	0	0	0	0	0	0	0	0	0	0	0	0	0	0	0	0	0	0	0	0	0	0	0
421	695288	81.81	71.4	92.21	5.31	0	0	0	0	0	0	0	0	0	0	0	0	0	0	0	0	0	0	0	0	0	0	0	0	0	0	0	0	0	0	0	0	0	0	0	0	0	0	0
422	696939	81.81	71.4	92.21	5.31	0	0	0	0	0	0	0	0	0	0	0	0	0	0	0	0	0	0	0	0	0	0	0	0	0	0	0	0	0	0	0	0	0	0	0	0	0	0	0
423	698591	81.81	71.4	92.21	5.31	0	0	0	0	0	0	0	0	0	0	0	0	0	0	0	0	0	0	0	0	0	0	0	0	0	0	0	0	0	0	0	0	0	0	0	0	0	0	0
424	700242	81.81	71.4	92.21	5.31	0	0	0	0	0	0	0	0	0	0	0	0	0	0	0	0	0	0	0	0	0	0	0	0	0	0	0	0	0	0	0	0	0	0	0	0	0	0	0
425	701894	81.81	71.4	92.21	5.31	0	0	0	0	0	0	0	0	0	0	0	0	0	0	0	0	0	0	0	0	0	0	0	0	0	0	0	0	0	0	0	0	0	0	0	0	0	0	0
426	703545	81.81	71.4	92.21	5.31	0	0	0	0	0	0	0	0	0	0	0	0	0	0	0	0	0	0	0	0	0	0	0	0	0	0	0	0	0	0	0	0	0	0	0	0	0	0	0
427	705197	81.81	71.4	92.21	5.31	0	0	0	0	0	0	0	0	0	0	0	0	0	0	0	0	0	0	0	0	0	0	0	0	0	0	0	0	0	0	0	0	0	0	0	0	0	0	0
428	706848	81.81	71.4	92.21	5.31	0	0	0	0	0	0	0	0	0	0	0	0	0	0	0	0	0	0	0	0	0	0	0	0	0	0	0	0	0	0	0	0	0	0	0	0	0	0	0
429	708500	81.81	71.4	92.21	5.31	0	0	0	0	0	0	0	0	0	0	0	0	0	0	0	0	0	0	0	0	0	0	0	0	0	0	0	0	0	0	0	0	0	0	0	0	0	0	0
430	710151	81.81	71.4	92.21	5.31	0	0	0	0	0	0	0	0	0	0	0	0	0	0	0	0	0	0	0	0	0	0	0	0	0	0	0	0	0	0	0	0	0	0	0	0	0	0	0
431	711803	81.81	71.4	92.21	5.31	0	0	0	0	0	0	0	0	0	0	0	0	0	0	0	0	0	0	0	0	0	0	0	0	0	0	0	0	0	0	0	0	0	0	0	0	0	0	0
432	713454	81.81	71.4	92.21	5.31	0	0	0	0	0	0	0	0	0	0	0	0	0	0	0	0	0	0	0	0	0	0	0	0	0	0	0	0	0	0	0	0	0	0	0	0	0	0	0
433	715106	81.81	71.4	92.21	5.31	0	0	0	0	0	0	0	0	0	0	0	0	0	0	0	0	0	0	0	0	0	0	0	0	0	0	0	0	0	0	0	0	0	0	0	0	0	0	0
434	716757	81.81	71.4	92.21	5.31	0	0	0	0	0	0	0	0	0	0	0	0	0	0	0	0	0	0	0	0	0	0	0	0	0	0	0	0	0	0	0	0	0	0	0	0	0	0	0
435	718409	81.81	71.4	92.21	5.31	0	0	0	0	0	0	0	0	0	0	0	0	0	0	0	0	0	0	0	0	0	0	0	0	0	0	0	0	0	0	0	0	0	0	0	0	0	0	0
436	720060	81.81	71.4	92.21	5.31	0	0	0	0	0	0	0	0	0	0	0	0	0	0	0	0	0	0	0	0	0	0	0	0	0	0	0	0	0	0	0	0	0	0	0	0	0	0	0
437	721712	81.81	71.4	92.21	5.31	0	0	0	0	0	0	0	0	0	0	0	0	0	0	0	0	0	0	0	0	0	0	0	0	0	0	0	0	0	0	0	0	0	0	0	0	0	0	0
438	723363	81.81	71.4	92.21	5.31	0	0	0	0	0	0	0	0	0	0	0	0	0	0	0	0	0	0	0	0	0	0	0	0	0	0	0	0	0	0	0	0	0	0	0	0	0	0	0
439	725015	81.81	71.4	92.21	5.31	0	0	0	0	0	0	0	0	0	0	0	0	0	0	0	0	0	0	0	0	0	0	0	0	0	0	0	0	0	0	0	0	0	0	0	0	0	0	0
440	726666	81.81	71.4	92.21	5.31	0	0	0	0	0	0	0	0	0	0	0	0	0	0	0	0	0	0	0	0	0	0	0	0	0	0	0	0	0	0	0	0	0	0	0	0	0	0	0
441	728318	81.81	71.4	92.21	5.31	0	0	0	0	0	0	0	0	0	0	0	0	0	0	0	0	0	0	0	0	0	0	0	0	0	0	0	0	0	0	0	0	0	0	0	0	0	0	0
442	729969	81.81	71.4	92.21	5.31	0	0	0	0	0	0	0	0	0	0	0	0	0	0	0	0	0	0	0	0	0	0	0	0	0	0	0	0	0	0	0	0	0	0	0	0	0	0	0
443	731621	81.81	71.4	92.21	5.31	0	0	0	0	0	0	0	0	0	0	0	0	0	0	0	0	0	0	0	0	0	0	0	0	0	0	0	0	0	0	0	0	0	0	0	0	0	0	0
444	733272	81.81	71.4	92.21	5.31	0	0	0	0	0	0	0	0	0	0	0	0	0	0	0	0	0	0	0	0	0	0	0	0	0	0	0	0	0	0	0	0	0	0	0	0	0	0	0
445	734924	81.81	71.4	92.21	5.31	0	0	0	0	0	0	0	0	0	0	0	0	0	0	0	0	0	0	0	0	0	0	0	0	0	0	0	0	0	0	0	0	0	0	0	0	0	0	0
446	736575	81.81	71.4	92.21	5.31	0	0	0	0	0	0	0	0	0	0	0	0	0	0	0	0	0	0	0	0	0	0	0	0	0	0	0	0	0	0	0	0	0	0	0	0	0	0	0
447	738227	81.81	71.4	92.21	5.31	0	0	0	0	0	0	0	0	0	0	0	0	0	0	0	0	0	0	0	0	0	0	0	0	0	0	0	0	0	0	0	0	0	0	0	0	0	0	0
448	739878	81.81	71.4	92.21	5.31	0	0	0	0	0	0	0	0	0	0	0	0	0	0	0	0	0	0	0	0	0	0	0	0	0	0	0	0	0	0	0	0	0	0	0	0	0	0	0
449	741530	81.81	71.4	92.21	5.31	0	0	0	0	0	0	0	0	0	0	0	0	0	0	0	0	0	0	0	0	0	0	0	0	0	0	0	0	0	0	0	0	0	0	0	0	0	0	0
450	743181	81.81	71.4	92.21	5.31	0	0	0	0	0	0	0	0	0	0	0	0	0	0	0	0	0	0	0	0	0	0	0	0	0	0	0	0	0	0	0	0	0	0	0	0	0	0	0
451	744833	81.81	71.4	92.21	5.31	0	0	0	0	0	0	0	0	0	0	0	0	0	0	0	0	0	0	0	0	0	0	0	0	0	0	0	0	0	0	0	0	0	0	0	0	0	0	0
452	746484	81.81	71.4	92.21	5.31	0	0	0	0	0	0	0	0	0	0	0	0	0	0	0	0	0	0	0	0	0	0	0	0	0	0	0	0	0	0	0	0	0	0	0	0	0	0	0
453	748136	81.81	71.4	92.21	5.31	0	0	0	0	0	0	0	0	0	0	0	0	0	0	0	0	0	0	0	0	0	0	0	0	0	0	0	0	0	0	0	0	0	0	0	0	0	0	0
454	749787	81.81	71.4	92.21	5.31	0	0	0	0	0	0	0	0	0	0	0	0	0	0	0	0	0	0	0	0	0	0	0	0	0	0	0	0	0	0	0	0	0	0	0	0	0	0	0
455	751439	81.81	71.4	92.21	5.31	0	0	0	0	0	0	0	0	0	0	0	0	0	0	0	0	0	0	0	0	0	0	0	0	0	0	0	0	0	0	0	0	0	0	0	0	0	0	0
456	753091	81.81	71.4	92.21	5.31	0	0	0	0	0	0	0	0	0	0	0	0	0	0	0	0	0	0	0	0	0	0	0	0	0	0	0	0	0	0	0	0	0	0	0	0	0	0	0
457	754742	81.81	71.4	92.21	5.31	0	0	0	0	0	0	0	0	0	0	0	0	0	0	0	0	0	0	0	0	0	0	0	0	0	0	0	0	0	0	0	0	0	0	0	0	0	0	0
458	756394	81.81	71.4	92.21	5.31	0	0	0	0	0	0	0	0	0	0	0	0	0	0	0	0	0	0	0	0	0	0	0	0	0	0	0	0	0	0	0	0	0	0	0	0	0	0	0
459	758045	81.81	71.4	92.21	5.31	0	0	0	0	0	0	0	0	0	0	0	0	0	0	0	0	0	0	0	0	0	0	0	0	0	0	0	0	0	0	0	0	0	0	0	0	0	0	0
460	759697	81.81	71.4	92.21	5.31	0	0	0	0	0	0	0	0	0	0	0	0	0	0	0	0	0	0	0	0	0	0	0	0	0	0	0	0	0	0	0	0	0	0	0	0	0	0	0
461	761348	81.81	71.4	92.21	5.31	0	0	0	0	0	0	0	0	0	0	0	0	0	0	0	0	0	0	0	0	0	0	0	0	0	0	0	0	0	0	0	0	0	0	0	0	0	0	0
462	763000	81.81	71.4	92.21	5.31	0	0	0	0	0	0	0	0	0	0	0	0	0	0	0	0	0	0	0	0	0	0	0	0	0	0	0	0	0	0	0	0	0	0	0	0	0	0	0
463	764651	81.81	71.4	92.21	5.31	0	0	0	0	0	0	0	0	0	0	0	0	0	0	0	0	0	0	0	0	0	0	0	0	0	0	0	0	0	0	0	0	0	0	0	0	0	0	0
464	766303	81.81	71.4	92.21	5.31	0	0	0	0	0	0	0	0	0	0	0	0	0	0	0	0	0	0	0	0	0	0	0	0	0	0	0	0	0	0	0	0	0	0	0	0	0	0	0
465	767954	81.81	71.4	92.21	5.31	0	0	0	0	0	0	0	0	0	0	0	0	0	0	0	0	0	0	0	0	0	0	0	0	0	0	0	0	0	0	0	0	0	0	0	0	0	0	0
466	769606	81.81	71.4	92.21	5.31	0	0	0	0	0	0	0	0	0	0	0	0	0	0	0	0	0	0	0	0	0	0	0	0	0	0	0	0	0	0	0	0	0	0	0	0	0	0	0
467	771257	81.81	71.4	92.21	5.31	0	0	0	0	0	0	0	0	0	0	0	0	0	0	0	0	0	0	0	0	0	0	0	0	0	0	0	0	0	0	0	0	0	0	0	0	0	0	0
468	772909	81.81	71.4	92.21	5.31	0	0	0	0	0	0	0	0	0	0	0	0	0	0	0	0	0	0	0	0	0	0	0	0	0	0	0	0	0	0	0	0	0	0	0	0	0	0	0
469	774560	81.81	71.4	92.21	5.31	0	0	0	0	0	0	0	0	0	0	0	0	0	0	0	0	0	0	0	0	0	0	0	0	0	0	0	0	0	0	0	0	0	0	0	0	0	0	0
470	776212	81.81	71.4	92.21	5.31	0	0	0	0	0	0	0	0	0	0	0	0	0	0	0	0	0	0	0	0	0	0	0	0	0	0	0	0	0	0	0	0	0	0	0	0	0	0	0
471	777863	81.81	71.4	92.21	5.31	0	0	0	0	0	0	0	0	0	0	0	0	0	0	0	0	0	0	0	0	0	0	0	0	0	0	0	0	0	0	0	0	0	0	0	0	0	0	0
472	779515	81.81	71.4	92.21	5.31	0	0	0	0	0	0	0	0	0	0	0	0	0	0	0	0	0	0	0	0	0	0	0	0	0	0	0	0	0	0	0	0	0	0	0	0	0	0	0
473	781166	81.81	71.4	92.21	5.31	0	0	0	0	0	0	0	0	0	0	0	0	0	0	0	0	0	0	0	0	0	0	0	0	0	0	0	0	0	0	0	0	0	0	0	0	0	0	0
474	782818	81.81	71.4	92.21	5.31	0	0	0	0	0	0	0	0	0	0	0	0	0	0	0	0	0	0	0	0	0	0	0	0	0	0	0	0	0	0	0	0	0	0	0	0	0	0	0
475	784469	81.81	71.4	92.21	5.31	0	0	0	0	0	0	0	0	0	0	0	0	0	0	0	0	0	0	0	0	0	0	0	0	0	0	0	0	0	0	0	0	0	0	0	0	0	0	0
476	786121	81.81	71.4	92.21	5.31	0	0	0	0	0	0	0	0	0	0	0	0	0	0	0	0	0	0	0	0	0	0	0	0	0	0	0	0	0	0	0	0	0	0	0	0	0	0	0
477	787772	81.81	71.4	92.21	5.31	0	0	0	0	0	0	0	0	0	0	0	0	0	0	0	0	0	0	0	0	0	0	0	0	0	0	0	0	0	0	0	0	0	0	0	0	0	0	0
478	789424	81.81	71.4	92.21	5.31	0	0	0	0	0	0	0	0	0	0	0	0	0	0	0	0	0	0	0	0	0	0	0	0	0	0	0	0	0	0	0	0	0	0	0	0	0	0	0
479	791075	81.81	71.4	92.21	5.31	0	0	0	0	0	0	0	0	0	0	0	0	0	0	0	0	0	0	0	0	0	0	0	0	0	0	0	0	0	0	0	0	0	0	0	0	0	0	0
480	792727	81.81	71.4	92.21	5.31	0	0	0	0	0	0	0	0	0	0	0	0	0	0	0	0	0	0	0	0	0	0	0	0	0	0	0	0	0	0	0	0	0	0	0	0	0	0	0
481	794378	81.81	71.4	92.21	5.31	0	0	0	0	0	0	0	0	0	0	0	0	0	0	0	0	0	0	0	0	0	0	0	0	0	0	0	0	0	0	0	0	0	0	0	0	0	0	0
482	796030	81.81	71.4	92.21	5.31	0	0	0	0	0	0	0	0	0	0	0	0	0	0	0	0	0	0	0	0	0	0	0	0	0	0	0	0	0	0	0	0	0	0	0	0	0	0	0
483	797681	81.81	71.4	92.21	5.31	0	0	0	0	0	0	0	0	0	0	0	0	0	0	0	0	0	0	0	0	0	0	0	0	0	0	0	0	0	0	0	0	0	0	0	0	0	0	0
484	799333	81.81	71.4	92.21	5.31	0	0	0	0	0	0	0	0	0	0	0	0	0	0	0	0	0	0	0	0	0	0	0	0	0	0	0	0	0	0	0	0	0	0	0	0	0	0	0
485	800984	81.81	71.4	92.21	5.31	0	0	0	0	0	0	0	0	0	0	0	0	0	0	0	0	0	0	0	0	0	0	0	0	0	0	0	0	0	0	0	0	0	0	0	0	0	0	0
486	802636	81.81	71.4	92.21	5.31	0	0	0	0	0	0	0	0	0	0	0	0	0	0	0	0	0	0	0	0	0	0	0	0	0	0	0	0	0	0	0	0	0	0	0	0	0	0	0
487	804287	81.81	71.4	92.21	5.31	0	0	0	0	0	0	0	0	0	0	0	0	0	0	0	0	0	0	0	0	0	0	0	0	0	0	0	0	0	0	0	0	0	0	0	0	0	0	0
488	805939	81.81	71.4	92.21	5.31	0	0	0	0	0	0	0	0	0	0	0	0	0	0	0	0	0	0	0	0	0	0	0	0	0	0	0	0	0	0	0	0	0	0	0	0	0	0	0
489	807590	81.81	71.4	92.21	5.31	0	0	0	0	0	0	0	0	0	0	0	0	0	0	0	0	0	0	0	0	0	0	0	0	0	0	0	0	0	0	0	0	0	0	0	0	0	0	0
490	809242	81.81	71.4	92.21	5.31	0	0	0	0	0	0	0	0	0	0	0	0	0	0	0	0	0	0	0	0	0	0	0	0	0	0	0	0	0	0	0	0	0	0	0	0	0	0	0
491	810894	81.81	71.4	92.21	5.31	0	0	0	0	0	0	0	0	0	0	0	0	0	0	0	0	0	0	0	0	0	0	0	0	0	0	0	0	0	0	0	0	0	0	0	0	0	0	0
492	812545	81.81	71.4	92.21	5.31	0	0	0	0	0	0	0	0	0	0	0	0	0	0	0	0	0	0	0	0	0	0	0	0	0	0	0	0	0	0	0	0	0	0	0	0	0	0	0
493	814197	81.81	71.4	92.21	5.31	0	0	0	0	0	0	0	0	0	0	0	0	0	0	0	0	0	0	0	0	0	0	0	0	0	0	0	0	0	0	0	0	0	0	0	0	0	0	0
494	815848	81.81	71.4	92.21	5.31	0	0	0	0	0	0	0	0	0	0	0	0	0	0	0	0	0	0	0	0	0	0	0	0	0	0	0	0	0	0	0	0	0	0	0	0	0	0	0
495	817500	81.81	71.4	92.21	5.31	0	0	0	0	0	0	0	0	0	0	0	0	0	0	0	0	0	0	0	0	0	0	0	0	0	0	0	0	0	0	0	0	0	0	0	0	0	0	0
496	819151	81.81	71.4	92.21	5.31	0	0	0	0	0	0	0	0	0	0	0	0	0	0	0	0	0	0	0	0	0	0	0	0	0	0	0	0	0	0	0	0	0	0	0	0	0	0	0
497	820803	81.81	71.4	92.21	5.31	0	0	0	0	0	0	0	0	0	0	0	0	0	0	0	0	0	0	0	0	0	0	0	0	0	0	0	0	0	0	0	0	0	0	0	0	0	0	0
498	822454	81.81	71.4	92.21	5.31	0	0	0	0	0	0	0	0	0	0	0	0	0	0	0	0	0	0	0	0	0	0	0	0	0	0	0	0	0	0	0	0	0	0	0	0	0	0	0
499	824106	81.81	71.4	92.21	5.31	0	0	0	0	0	0	0	0	0	0	0	0	0	0	0	0	0	0	0	0	0	0	0	0	0	0	0	0	0	0	0	0	0	0	0	0	0	0	0
500	825757	81.81	71.4	92.21	5.31	0	0	0	0	0	0	0	0	0	0	0	0	0	0	0	0	0	0	0	0	0	0	0	0	0	0	0	0	0	0	0	0	0	0	0	0	0	0	0

## Sheet: Zooplankton polytrophy
EstimateS (Version 9.1.0), Copyright R. K. Colwell: http://purl.oclc.org/estimates
Diversity Output from Input File: DIMI (11, sierpieÄ 2017, )
Reference Sample = 17
Samples	Individuals (computed)	S(est)	S(est) 95% CI Lower Bound	S(est) 95% CI Upper Bound	S(est) SD	S Mean (runs)	Singletons Mean	Singletons SD (runs)	Doubletons Mean	Doubletons SD (runs)	Uniques Mean	Uniques SD (runs)	Duplicates Mean	Duplicates SD (runs)	ACE Mean	ACE SD (runs)	ICE Mean	ICE SD (runs)	Chao 1 Mean	Chao 1 95% CI Lower Bound	Chao 1 95% CI Upper Bound	Chao 1 SD (analytical)	Chao 2 Mean	Chao 2 95% CI Lower Bound	Chao 2 95% CI Upper Bound	Chao 2 SD (analytical)	Jack 1 Mean	Jack 1 SD (analytical)	Jack 2 Mean	Jack 2 SD (runs)	Bootstrap Mean	Bootstrap SD (runs)	MMRuns Mean	MMMeans (1 run)	Cole Rarefaction	Cole SD (analytical)	Alpha Mean	Alpha SD (analytical)	Shannon Mean	Shannon SD (runs)	Shannon Exponential Mean	Shannon Exponential SD (runs)	Simpson Inv Mean	Simpson Inv SD (runs)
1	5099.71	18.62	14.32	22.91	2.19	18.61	1.48	1.97	1.16	1.07	18.61	4.31	0	0	20.33	6.45	18.61	4.31	19.47	18.8	25.43	1.37	18.61	29.44	29.44	0	18.61	0	0	0	18.61	4.31	0	0	39.52	2.03	2.55	0.21	1.47	0.42	4.68	1.65	3.06	1.09
2	10199.4	27.59	22.48	32.7	2.61	27.28	1.87	1.8	1.67	1.31	17.65	6.23	9.63	3.48	28.53	5.67	82	45.6	28.06	27.44	34.47	1.37	36.84	30.39	57.39	6.06	36.11	2.45	36.11	7.7	31.69	6.27	79.04	53.28	43.82	2.06	3.48	0.23	1.71	0.34	5.84	1.8	3.65	1.32
3	15299.1	33.41	28.05	38.76	2.73	33.23	2.46	1.78	1.97	1.39	17.34	5.15	9.51	2.84	34.72	5.25	59.75	17.55	34.26	33.42	42.26	1.65	43.6	36.56	66.16	6.64	44.79	4.19	48.99	9.1	38.72	5.9	93.38	55.06	46.5	2.04	4.11	0.24	1.83	0.28	6.45	1.7	3.84	1.23
4	20398.8	37.67	32.26	43.08	2.76	37.44	2.72	1.65	2.24	1.37	16.58	4.67	9.51	3.57	39.15	5.22	56.85	12.49	38.54	37.63	47.07	1.73	49.26	41.16	75.66	7.72	49.88	4.78	55	9.74	43.31	5.9	64.86	56.54	48.49	1.98	4.48	0.24	1.89	0.21	6.74	1.37	3.86	1.02
5	25498.5	40.8	35.39	46.21	2.76	40.67	3.02	1.72	2.46	1.27	16.32	4.62	9.43	2.93	42.55	5.12	57.97	11.4	41.92	40.89	51.05	1.87	52.29	44.36	77.82	7.51	53.73	5	59.27	10.42	46.82	5.72	63.03	57.51	50.05	1.88	4.78	0.24	1.91	0.21	6.87	1.36	3.81	0.97
6	30598.2	43.41	38.05	48.76	2.73	43.81	3.32	1.86	2.65	1.32	15.7	4.34	10	2.82	46	5.09	59.13	10.16	45.25	44.08	55	2.03	54.44	47.15	78.27	6.96	56.89	5.15	62.03	10.25	50.05	5.35	63.02	58.38	51.32	1.77	5.06	0.24	1.94	0.18	7.1	1.27	3.78	0.89
7	35697.9	45.57	40.28	50.85	2.69	45.92	3.7	1.95	2.79	1.26	15.35	4.27	9.45	2.54	48.43	5.15	60.48	9.82	47.66	46.24	58.43	2.3	57.48	49.52	83.63	7.62	59.08	5.28	64.42	10.55	52.18	5.32	62.89	59.15	52.35	1.65	5.22	0.24	1.96	0.14	7.19	1.02	3.75	0.72
8	40797.7	47.4	42.19	52.6	2.65	48.02	3.93	1.97	2.87	1.13	15.08	4.12	9.38	2.84	50.72	4.91	62.06	8.91	49.95	48.4	61.43	2.47	59.45	51.55	85.56	7.59	61.22	5.36	66.5	10.27	54.32	4.78	63.13	59.82	53.21	1.53	5.39	0.24	1.98	0.12	7.32	0.88	3.75	0.63
9	45897.3	48.98	43.85	54.11	2.62	49.2	3.93	2.01	2.9	1.11	14.48	4	9.02	3	51.97	4.78	62.34	8.07	51.15	49.55	62.67	2.49	60.27	52.56	86.29	7.5	62.07	5.2	67.19	10.07	55.36	4.47	63.23	60.43	53.92	1.42	5.46	0.24	2.01	0.11	7.49	0.82	3.81	0.54
10	50997.1	50.38	45.31	55.44	2.59	50.45	4.04	1.95	2.88	1.09	14.15	3.89	8.45	3.01	53.23	4.31	63.14	7.44	52.47	50.81	64.32	2.57	62.12	53.95	89.93	7.98	63.19	5.16	68.5	9.97	56.51	4.05	63.34	60.98	54.52	1.3	5.54	0.24	2.03	0.1	7.63	0.74	3.86	0.51
11	56096.8	51.62	46.6	56.64	2.56	51.6	4.09	1.94	3	1.1	13.75	3.83	8.3	3.01	54.44	4.07	63.64	7.17	53.6	51.99	65.33	2.54	63.39	55.09	92.03	8.17	64.1	5.07	69.24	9.84	57.56	3.9	63.45	61.48	55.03	1.19	5.61	0.24	2.04	0.08	7.72	0.6	3.85	0.4
12	61196.5	52.74	47.76	57.72	2.54	52.73	3.95	1.73	3.1	0.85	13.31	3.31	8.47	2.91	55.24	3.56	63.96	6.15	54.49	53.07	65.42	2.32	62.96	55.69	88.63	7.26	64.93	4.94	69.61	8.57	58.6	3.51	63.63	61.95	55.47	1.08	5.68	0.24	2.04	0.07	7.71	0.55	3.82	0.38
13	66296.2	53.75	48.79	58.72	2.53	53.81	4.03	1.59	3.08	0.82	13.12	3.11	8.45	2.76	56.28	3.31	64.31	5.72	55.6	54.14	66.87	2.39	64.28	56.81	90.9	7.5	65.92	4.78	70.47	8.12	59.65	3.28	63.86	62.38	55.85	0.96	5.75	0.24	2.04	0.06	7.72	0.47	3.81	0.33
14	71395.9	54.68	49.72	59.64	2.53	54.83	4	1.4	3.17	0.62	12.96	2.78	8.37	2.57	57.08	2.52	64.75	4.62	56.48	55.13	67.2	2.25	64.8	57.64	90.56	7.22	66.86	4.74	71.35	7.12	60.63	2.5	64.12	62.78	56.18	0.83	5.82	0.24	2.05	0.06	7.78	0.45	3.81	0.31
15	76495.6	55.52	50.55	60.5	2.54	55.61	4	1.27	3.13	0.63	12.71	2.39	8.44	2.33	57.7	2	65.1	3.79	57.24	55.91	68.04	2.25	64.61	58.12	88.27	6.6	67.47	4.64	71.7	6.23	61.34	1.95	64.36	63.16	56.48	0.68	5.87	0.24	2.06	0.05	7.85	0.37	3.83	0.25
16	81595.3	56.29	51.29	61.3	2.55	56.1	3.83	1.08	3.1	0.48	12.18	1.78	8.6	1.8	57.9	1.72	64.72	2.85	57.56	56.36	67.86	2.11	63.52	58.09	84.01	5.63	67.52	4.41	71.15	4.62	61.68	1.67	64.55	63.51	56.75	0.48	5.88	0.24	2.07	0.03	7.92	0.24	3.85	0.16
17	86695	57	51.95	62.05	2.58	57	4	0	3	0	12	0	9	0	58.71	0	64.92	0	58.5	57.18	69.47	2.23	63.21	58.6	81.14	4.87	68.29	4.29	71.44	0	62.57	0	64.77	63.84	0	0	5.95	0.24	2.07	0	7.94	0	3.83	0
18	91794.7	57.65	52.52	62.77	2.61	0	0	0	0	0	0	0	0	0	0	0	0	0	0	0	0	0	0	0	0	0	0	0	0	0	0	0	0	0	0	0	0	0	0	0	0	0	0	0
19	96894.4	58.24	53.02	63.45	2.66	0	0	0	0	0	0	0	0	0	0	0	0	0	0	0	0	0	0	0	0	0	0	0	0	0	0	0	0	0	0	0	0	0	0	0	0	0	0	0
20	101994	58.77	53.45	64.1	2.72	0	0	0	0	0	0	0	0	0	0	0	0	0	0	0	0	0	0	0	0	0	0	0	0	0	0	0	0	0	0	0	0	0	0	0	0	0	0	0
21	107094	59.27	53.81	64.72	2.78	0	0	0	0	0	0	0	0	0	0	0	0	0	0	0	0	0	0	0	0	0	0	0	0	0	0	0	0	0	0	0	0	0	0	0	0	0	0	0
22	112194	59.72	54.12	65.32	2.86	0	0	0	0	0	0	0	0	0	0	0	0	0	0	0	0	0	0	0	0	0	0	0	0	0	0	0	0	0	0	0	0	0	0	0	0	0	0	0
23	117293	60.13	54.37	65.89	2.94	0	0	0	0	0	0	0	0	0	0	0	0	0	0	0	0	0	0	0	0	0	0	0	0	0	0	0	0	0	0	0	0	0	0	0	0	0	0	0
24	122393	60.51	54.57	66.44	3.03	0	0	0	0	0	0	0	0	0	0	0	0	0	0	0	0	0	0	0	0	0	0	0	0	0	0	0	0	0	0	0	0	0	0	0	0	0	0	0
25	127493	60.85	54.73	66.97	3.12	0	0	0	0	0	0	0	0	0	0	0	0	0	0	0	0	0	0	0	0	0	0	0	0	0	0	0	0	0	0	0	0	0	0	0	0	0	0	0
26	132592	61.17	54.86	67.48	3.22	0	0	0	0	0	0	0	0	0	0	0	0	0	0	0	0	0	0	0	0	0	0	0	0	0	0	0	0	0	0	0	0	0	0	0	0	0	0	0
27	137692	61.46	54.95	67.96	3.32	0	0	0	0	0	0	0	0	0	0	0	0	0	0	0	0	0	0	0	0	0	0	0	0	0	0	0	0	0	0	0	0	0	0	0	0	0	0	0
28	142792	61.72	55.02	68.42	3.42	0	0	0	0	0	0	0	0	0	0	0	0	0	0	0	0	0	0	0	0	0	0	0	0	0	0	0	0	0	0	0	0	0	0	0	0	0	0	0
29	147891	61.96	55.06	68.86	3.52	0	0	0	0	0	0	0	0	0	0	0	0	0	0	0	0	0	0	0	0	0	0	0	0	0	0	0	0	0	0	0	0	0	0	0	0	0	0	0
30	152991	62.18	55.09	69.27	3.62	0	0	0	0	0	0	0	0	0	0	0	0	0	0	0	0	0	0	0	0	0	0	0	0	0	0	0	0	0	0	0	0	0	0	0	0	0	0	0
31	158091	62.38	55.09	69.67	3.72	0	0	0	0	0	0	0	0	0	0	0	0	0	0	0	0	0	0	0	0	0	0	0	0	0	0	0	0	0	0	0	0	0	0	0	0	0	0	0
32	163191	62.57	55.09	70.05	3.82	0	0	0	0	0	0	0	0	0	0	0	0	0	0	0	0	0	0	0	0	0	0	0	0	0	0	0	0	0	0	0	0	0	0	0	0	0	0	0
33	168290	62.73	55.07	70.4	3.91	0	0	0	0	0	0	0	0	0	0	0	0	0	0	0	0	0	0	0	0	0	0	0	0	0	0	0	0	0	0	0	0	0	0	0	0	0	0	0
34	173390	62.89	55.04	70.74	4.01	0	0	0	0	0	0	0	0	0	0	0	0	0	0	0	0	0	0	0	0	0	0	0	0	0	0	0	0	0	0	0	0	0	0	0	0	0	0	0
35	178490	63.03	55	71.06	4.1	0	0	0	0	0	0	0	0	0	0	0	0	0	0	0	0	0	0	0	0	0	0	0	0	0	0	0	0	0	0	0	0	0	0	0	0	0	0	0
36	183589	63.16	54.96	71.36	4.18	0	0	0	0	0	0	0	0	0	0	0	0	0	0	0	0	0	0	0	0	0	0	0	0	0	0	0	0	0	0	0	0	0	0	0	0	0	0	0
37	188689	63.28	54.91	71.64	4.27	0	0	0	0	0	0	0	0	0	0	0	0	0	0	0	0	0	0	0	0	0	0	0	0	0	0	0	0	0	0	0	0	0	0	0	0	0	0	0
38	193789	63.38	54.86	71.9	4.35	0	0	0	0	0	0	0	0	0	0	0	0	0	0	0	0	0	0	0	0	0	0	0	0	0	0	0	0	0	0	0	0	0	0	0	0	0	0	0
39	198889	63.48	54.81	72.15	4.42	0	0	0	0	0	0	0	0	0	0	0	0	0	0	0	0	0	0	0	0	0	0	0	0	0	0	0	0	0	0	0	0	0	0	0	0	0	0	0
40	203988	63.57	54.76	72.39	4.5	0	0	0	0	0	0	0	0	0	0	0	0	0	0	0	0	0	0	0	0	0	0	0	0	0	0	0	0	0	0	0	0	0	0	0	0	0	0	0
41	209088	63.65	54.7	72.61	4.57	0	0	0	0	0	0	0	0	0	0	0	0	0	0	0	0	0	0	0	0	0	0	0	0	0	0	0	0	0	0	0	0	0	0	0	0	0	0	0
42	214188	63.73	54.64	72.81	4.63	0	0	0	0	0	0	0	0	0	0	0	0	0	0	0	0	0	0	0	0	0	0	0	0	0	0	0	0	0	0	0	0	0	0	0	0	0	0	0
43	219287	63.8	54.59	73.01	4.7	0	0	0	0	0	0	0	0	0	0	0	0	0	0	0	0	0	0	0	0	0	0	0	0	0	0	0	0	0	0	0	0	0	0	0	0	0	0	0
44	224387	63.86	54.53	73.19	4.76	0	0	0	0	0	0	0	0	0	0	0	0	0	0	0	0	0	0	0	0	0	0	0	0	0	0	0	0	0	0	0	0	0	0	0	0	0	0	0
45	229487	63.92	54.48	73.36	4.82	0	0	0	0	0	0	0	0	0	0	0	0	0	0	0	0	0	0	0	0	0	0	0	0	0	0	0	0	0	0	0	0	0	0	0	0	0	0	0
46	234586	63.97	54.43	73.51	4.87	0	0	0	0	0	0	0	0	0	0	0	0	0	0	0	0	0	0	0	0	0	0	0	0	0	0	0	0	0	0	0	0	0	0	0	0	0	0	0
47	239686	64.02	54.37	73.66	4.92	0	0	0	0	0	0	0	0	0	0	0	0	0	0	0	0	0	0	0	0	0	0	0	0	0	0	0	0	0	0	0	0	0	0	0	0	0	0	0
48	244786	64.06	54.32	73.8	4.97	0	0	0	0	0	0	0	0	0	0	0	0	0	0	0	0	0	0	0	0	0	0	0	0	0	0	0	0	0	0	0	0	0	0	0	0	0	0	0
49	249886	64.1	54.28	73.93	5.01	0	0	0	0	0	0	0	0	0	0	0	0	0	0	0	0	0	0	0	0	0	0	0	0	0	0	0	0	0	0	0	0	0	0	0	0	0	0	0
50	254985	64.14	54.23	74.05	5.06	0	0	0	0	0	0	0	0	0	0	0	0	0	0	0	0	0	0	0	0	0	0	0	0	0	0	0	0	0	0	0	0	0	0	0	0	0	0	0
51	260085	64.17	54.18	74.16	5.1	0	0	0	0	0	0	0	0	0	0	0	0	0	0	0	0	0	0	0	0	0	0	0	0	0	0	0	0	0	0	0	0	0	0	0	0	0	0	0
52	265185	64.2	54.14	74.26	5.13	0	0	0	0	0	0	0	0	0	0	0	0	0	0	0	0	0	0	0	0	0	0	0	0	0	0	0	0	0	0	0	0	0	0	0	0	0	0	0
53	270284	64.23	54.1	74.36	5.17	0	0	0	0	0	0	0	0	0	0	0	0	0	0	0	0	0	0	0	0	0	0	0	0	0	0	0	0	0	0	0	0	0	0	0	0	0	0	0
54	275384	64.26	54.06	74.45	5.2	0	0	0	0	0	0	0	0	0	0	0	0	0	0	0	0	0	0	0	0	0	0	0	0	0	0	0	0	0	0	0	0	0	0	0	0	0	0	0
55	280484	64.28	54.02	74.54	5.23	0	0	0	0	0	0	0	0	0	0	0	0	0	0	0	0	0	0	0	0	0	0	0	0	0	0	0	0	0	0	0	0	0	0	0	0	0	0	0
56	285584	64.3	53.99	74.61	5.26	0	0	0	0	0	0	0	0	0	0	0	0	0	0	0	0	0	0	0	0	0	0	0	0	0	0	0	0	0	0	0	0	0	0	0	0	0	0	0
57	290683	64.32	53.95	74.69	5.29	0	0	0	0	0	0	0	0	0	0	0	0	0	0	0	0	0	0	0	0	0	0	0	0	0	0	0	0	0	0	0	0	0	0	0	0	0	0	0
58	295783	64.34	53.92	74.76	5.32	0	0	0	0	0	0	0	0	0	0	0	0	0	0	0	0	0	0	0	0	0	0	0	0	0	0	0	0	0	0	0	0	0	0	0	0	0	0	0
59	300883	64.35	53.89	74.82	5.34	0	0	0	0	0	0	0	0	0	0	0	0	0	0	0	0	0	0	0	0	0	0	0	0	0	0	0	0	0	0	0	0	0	0	0	0	0	0	0
60	305982	64.37	53.86	74.88	5.36	0	0	0	0	0	0	0	0	0	0	0	0	0	0	0	0	0	0	0	0	0	0	0	0	0	0	0	0	0	0	0	0	0	0	0	0	0	0	0
61	311082	64.38	53.83	74.93	5.38	0	0	0	0	0	0	0	0	0	0	0	0	0	0	0	0	0	0	0	0	0	0	0	0	0	0	0	0	0	0	0	0	0	0	0	0	0	0	0
62	316182	64.4	53.81	74.98	5.4	0	0	0	0	0	0	0	0	0	0	0	0	0	0	0	0	0	0	0	0	0	0	0	0	0	0	0	0	0	0	0	0	0	0	0	0	0	0	0
63	321281	64.41	53.79	75.03	5.42	0	0	0	0	0	0	0	0	0	0	0	0	0	0	0	0	0	0	0	0	0	0	0	0	0	0	0	0	0	0	0	0	0	0	0	0	0	0	0
64	326381	64.42	53.76	75.07	5.44	0	0	0	0	0	0	0	0	0	0	0	0	0	0	0	0	0	0	0	0	0	0	0	0	0	0	0	0	0	0	0	0	0	0	0	0	0	0	0
65	331481	64.43	53.74	75.11	5.45	0	0	0	0	0	0	0	0	0	0	0	0	0	0	0	0	0	0	0	0	0	0	0	0	0	0	0	0	0	0	0	0	0	0	0	0	0	0	0
66	336581	64.44	53.72	75.15	5.47	0	0	0	0	0	0	0	0	0	0	0	0	0	0	0	0	0	0	0	0	0	0	0	0	0	0	0	0	0	0	0	0	0	0	0	0	0	0	0
67	341680	64.44	53.7	75.19	5.48	0	0	0	0	0	0	0	0	0	0	0	0	0	0	0	0	0	0	0	0	0	0	0	0	0	0	0	0	0	0	0	0	0	0	0	0	0	0	0
68	346780	64.45	53.68	75.22	5.49	0	0	0	0	0	0	0	0	0	0	0	0	0	0	0	0	0	0	0	0	0	0	0	0	0	0	0	0	0	0	0	0	0	0	0	0	0	0	0
69	351880	64.46	53.67	75.25	5.51	0	0	0	0	0	0	0	0	0	0	0	0	0	0	0	0	0	0	0	0	0	0	0	0	0	0	0	0	0	0	0	0	0	0	0	0	0	0	0
70	356979	64.46	53.65	75.28	5.52	0	0	0	0	0	0	0	0	0	0	0	0	0	0	0	0	0	0	0	0	0	0	0	0	0	0	0	0	0	0	0	0	0	0	0	0	0	0	0
71	362079	64.47	53.64	75.3	5.53	0	0	0	0	0	0	0	0	0	0	0	0	0	0	0	0	0	0	0	0	0	0	0	0	0	0	0	0	0	0	0	0	0	0	0	0	0	0	0
72	367179	64.47	53.62	75.33	5.54	0	0	0	0	0	0	0	0	0	0	0	0	0	0	0	0	0	0	0	0	0	0	0	0	0	0	0	0	0	0	0	0	0	0	0	0	0	0	0
73	372279	64.48	53.61	75.35	5.54	0	0	0	0	0	0	0	0	0	0	0	0	0	0	0	0	0	0	0	0	0	0	0	0	0	0	0	0	0	0	0	0	0	0	0	0	0	0	0
74	377378	64.48	53.6	75.37	5.55	0	0	0	0	0	0	0	0	0	0	0	0	0	0	0	0	0	0	0	0	0	0	0	0	0	0	0	0	0	0	0	0	0	0	0	0	0	0	0
75	382478	64.49	53.59	75.39	5.56	0	0	0	0	0	0	0	0	0	0	0	0	0	0	0	0	0	0	0	0	0	0	0	0	0	0	0	0	0	0	0	0	0	0	0	0	0	0	0
76	387578	64.49	53.58	75.4	5.57	0	0	0	0	0	0	0	0	0	0	0	0	0	0	0	0	0	0	0	0	0	0	0	0	0	0	0	0	0	0	0	0	0	0	0	0	0	0	0
77	392677	64.49	53.57	75.42	5.57	0	0	0	0	0	0	0	0	0	0	0	0	0	0	0	0	0	0	0	0	0	0	0	0	0	0	0	0	0	0	0	0	0	0	0	0	0	0	0
78	397777	64.5	53.56	75.44	5.58	0	0	0	0	0	0	0	0	0	0	0	0	0	0	0	0	0	0	0	0	0	0	0	0	0	0	0	0	0	0	0	0	0	0	0	0	0	0	0
79	402877	64.5	53.55	75.45	5.59	0	0	0	0	0	0	0	0	0	0	0	0	0	0	0	0	0	0	0	0	0	0	0	0	0	0	0	0	0	0	0	0	0	0	0	0	0	0	0
80	407976	64.5	53.54	75.46	5.59	0	0	0	0	0	0	0	0	0	0	0	0	0	0	0	0	0	0	0	0	0	0	0	0	0	0	0	0	0	0	0	0	0	0	0	0	0	0	0
81	413076	64.51	53.54	75.47	5.6	0	0	0	0	0	0	0	0	0	0	0	0	0	0	0	0	0	0	0	0	0	0	0	0	0	0	0	0	0	0	0	0	0	0	0	0	0	0	0
82	418176	64.51	53.53	75.48	5.6	0	0	0	0	0	0	0	0	0	0	0	0	0	0	0	0	0	0	0	0	0	0	0	0	0	0	0	0	0	0	0	0	0	0	0	0	0	0	0
83	423276	64.51	53.52	75.49	5.61	0	0	0	0	0	0	0	0	0	0	0	0	0	0	0	0	0	0	0	0	0	0	0	0	0	0	0	0	0	0	0	0	0	0	0	0	0	0	0
84	428375	64.51	53.52	75.5	5.61	0	0	0	0	0	0	0	0	0	0	0	0	0	0	0	0	0	0	0	0	0	0	0	0	0	0	0	0	0	0	0	0	0	0	0	0	0	0	0
85	433475	64.51	53.51	75.51	5.61	0	0	0	0	0	0	0	0	0	0	0	0	0	0	0	0	0	0	0	0	0	0	0	0	0	0	0	0	0	0	0	0	0	0	0	0	0	0	0
86	438575	64.51	53.51	75.52	5.62	0	0	0	0	0	0	0	0	0	0	0	0	0	0	0	0	0	0	0	0	0	0	0	0	0	0	0	0	0	0	0	0	0	0	0	0	0	0	0
87	443674	64.52	53.5	75.53	5.62	0	0	0	0	0	0	0	0	0	0	0	0	0	0	0	0	0	0	0	0	0	0	0	0	0	0	0	0	0	0	0	0	0	0	0	0	0	0	0
88	448774	64.52	53.5	75.54	5.62	0	0	0	0	0	0	0	0	0	0	0	0	0	0	0	0	0	0	0	0	0	0	0	0	0	0	0	0	0	0	0	0	0	0	0	0	0	0	0
89	453874	64.52	53.49	75.54	5.62	0	0	0	0	0	0	0	0	0	0	0	0	0	0	0	0	0	0	0	0	0	0	0	0	0	0	0	0	0	0	0	0	0	0	0	0	0	0	0
90	458974	64.52	53.49	75.55	5.63	0	0	0	0	0	0	0	0	0	0	0	0	0	0	0	0	0	0	0	0	0	0	0	0	0	0	0	0	0	0	0	0	0	0	0	0	0	0	0
91	464073	64.52	53.49	75.55	5.63	0	0	0	0	0	0	0	0	0	0	0	0	0	0	0	0	0	0	0	0	0	0	0	0	0	0	0	0	0	0	0	0	0	0	0	0	0	0	0
92	469173	64.52	53.48	75.56	5.63	0	0	0	0	0	0	0	0	0	0	0	0	0	0	0	0	0	0	0	0	0	0	0	0	0	0	0	0	0	0	0	0	0	0	0	0	0	0	0
93	474273	64.52	53.48	75.56	5.63	0	0	0	0	0	0	0	0	0	0	0	0	0	0	0	0	0	0	0	0	0	0	0	0	0	0	0	0	0	0	0	0	0	0	0	0	0	0	0
94	479372	64.52	53.48	75.57	5.64	0	0	0	0	0	0	0	0	0	0	0	0	0	0	0	0	0	0	0	0	0	0	0	0	0	0	0	0	0	0	0	0	0	0	0	0	0	0	0
95	484472	64.52	53.47	75.57	5.64	0	0	0	0	0	0	0	0	0	0	0	0	0	0	0	0	0	0	0	0	0	0	0	0	0	0	0	0	0	0	0	0	0	0	0	0	0	0	0
96	489572	64.52	53.47	75.57	5.64	0	0	0	0	0	0	0	0	0	0	0	0	0	0	0	0	0	0	0	0	0	0	0	0	0	0	0	0	0	0	0	0	0	0	0	0	0	0	0
97	494671	64.52	53.47	75.58	5.64	0	0	0	0	0	0	0	0	0	0	0	0	0	0	0	0	0	0	0	0	0	0	0	0	0	0	0	0	0	0	0	0	0	0	0	0	0	0	0
98	499771	64.52	53.47	75.58	5.64	0	0	0	0	0	0	0	0	0	0	0	0	0	0	0	0	0	0	0	0	0	0	0	0	0	0	0	0	0	0	0	0	0	0	0	0	0	0	0
99	504871	64.52	53.47	75.58	5.64	0	0	0	0	0	0	0	0	0	0	0	0	0	0	0	0	0	0	0	0	0	0	0	0	0	0	0	0	0	0	0	0	0	0	0	0	0	0	0
100	509971	64.52	53.46	75.59	5.64	0	0	0	0	0	0	0	0	0	0	0	0	0	0	0	0	0	0	0	0	0	0	0	0	0	0	0	0	0	0	0	0	0	0	0	0	0	0	0
101	515070	64.53	53.46	75.59	5.64	0	0	0	0	0	0	0	0	0	0	0	0	0	0	0	0	0	0	0	0	0	0	0	0	0	0	0	0	0	0	0	0	0	0	0	0	0	0	0
102	520170	64.53	53.46	75.59	5.65	0	0	0	0	0	0	0	0	0	0	0	0	0	0	0	0	0	0	0	0	0	0	0	0	0	0	0	0	0	0	0	0	0	0	0	0	0	0	0
103	525270	64.53	53.46	75.59	5.65	0	0	0	0	0	0	0	0	0	0	0	0	0	0	0	0	0	0	0	0	0	0	0	0	0	0	0	0	0	0	0	0	0	0	0	0	0	0	0
104	530369	64.53	53.46	75.59	5.65	0	0	0	0	0	0	0	0	0	0	0	0	0	0	0	0	0	0	0	0	0	0	0	0	0	0	0	0	0	0	0	0	0	0	0	0	0	0	0
105	535469	64.53	53.46	75.6	5.65	0	0	0	0	0	0	0	0	0	0	0	0	0	0	0	0	0	0	0	0	0	0	0	0	0	0	0	0	0	0	0	0	0	0	0	0	0	0	0
106	540569	64.53	53.46	75.6	5.65	0	0	0	0	0	0	0	0	0	0	0	0	0	0	0	0	0	0	0	0	0	0	0	0	0	0	0	0	0	0	0	0	0	0	0	0	0	0	0
107	545669	64.53	53.45	75.6	5.65	0	0	0	0	0	0	0	0	0	0	0	0	0	0	0	0	0	0	0	0	0	0	0	0	0	0	0	0	0	0	0	0	0	0	0	0	0	0	0
108	550768	64.53	53.45	75.6	5.65	0	0	0	0	0	0	0	0	0	0	0	0	0	0	0	0	0	0	0	0	0	0	0	0	0	0	0	0	0	0	0	0	0	0	0	0	0	0	0
109	555868	64.53	53.45	75.6	5.65	0	0	0	0	0	0	0	0	0	0	0	0	0	0	0	0	0	0	0	0	0	0	0	0	0	0	0	0	0	0	0	0	0	0	0	0	0	0	0
110	560968	64.53	53.45	75.6	5.65	0	0	0	0	0	0	0	0	0	0	0	0	0	0	0	0	0	0	0	0	0	0	0	0	0	0	0	0	0	0	0	0	0	0	0	0	0	0	0
111	566067	64.53	53.45	75.6	5.65	0	0	0	0	0	0	0	0	0	0	0	0	0	0	0	0	0	0	0	0	0	0	0	0	0	0	0	0	0	0	0	0	0	0	0	0	0	0	0
112	571167	64.53	53.45	75.61	5.65	0	0	0	0	0	0	0	0	0	0	0	0	0	0	0	0	0	0	0	0	0	0	0	0	0	0	0	0	0	0	0	0	0	0	0	0	0	0	0
113	576267	64.53	53.45	75.61	5.65	0	0	0	0	0	0	0	0	0	0	0	0	0	0	0	0	0	0	0	0	0	0	0	0	0	0	0	0	0	0	0	0	0	0	0	0	0	0	0
114	581366	64.53	53.45	75.61	5.65	0	0	0	0	0	0	0	0	0	0	0	0	0	0	0	0	0	0	0	0	0	0	0	0	0	0	0	0	0	0	0	0	0	0	0	0	0	0	0
115	586466	64.53	53.45	75.61	5.65	0	0	0	0	0	0	0	0	0	0	0	0	0	0	0	0	0	0	0	0	0	0	0	0	0	0	0	0	0	0	0	0	0	0	0	0	0	0	0
116	591566	64.53	53.45	75.61	5.65	0	0	0	0	0	0	0	0	0	0	0	0	0	0	0	0	0	0	0	0	0	0	0	0	0	0	0	0	0	0	0	0	0	0	0	0	0	0	0
117	596666	64.53	53.45	75.61	5.65	0	0	0	0	0	0	0	0	0	0	0	0	0	0	0	0	0	0	0	0	0	0	0	0	0	0	0	0	0	0	0	0	0	0	0	0	0	0	0
118	601765	64.53	53.45	75.61	5.65	0	0	0	0	0	0	0	0	0	0	0	0	0	0	0	0	0	0	0	0	0	0	0	0	0	0	0	0	0	0	0	0	0	0	0	0	0	0	0
119	606865	64.53	53.45	75.61	5.65	0	0	0	0	0	0	0	0	0	0	0	0	0	0	0	0	0	0	0	0	0	0	0	0	0	0	0	0	0	0	0	0	0	0	0	0	0	0	0
120	611965	64.53	53.45	75.61	5.65	0	0	0	0	0	0	0	0	0	0	0	0	0	0	0	0	0	0	0	0	0	0	0	0	0	0	0	0	0	0	0	0	0	0	0	0	0	0	0
121	617064	64.53	53.45	75.61	5.65	0	0	0	0	0	0	0	0	0	0	0	0	0	0	0	0	0	0	0	0	0	0	0	0	0	0	0	0	0	0	0	0	0	0	0	0	0	0	0
122	622164	64.53	53.45	75.61	5.65	0	0	0	0	0	0	0	0	0	0	0	0	0	0	0	0	0	0	0	0	0	0	0	0	0	0	0	0	0	0	0	0	0	0	0	0	0	0	0
123	627264	64.53	53.44	75.61	5.66	0	0	0	0	0	0	0	0	0	0	0	0	0	0	0	0	0	0	0	0	0	0	0	0	0	0	0	0	0	0	0	0	0	0	0	0	0	0	0
124	632364	64.53	53.44	75.61	5.66	0	0	0	0	0	0	0	0	0	0	0	0	0	0	0	0	0	0	0	0	0	0	0	0	0	0	0	0	0	0	0	0	0	0	0	0	0	0	0
125	637463	64.53	53.44	75.61	5.66	0	0	0	0	0	0	0	0	0	0	0	0	0	0	0	0	0	0	0	0	0	0	0	0	0	0	0	0	0	0	0	0	0	0	0	0	0	0	0
126	642563	64.53	53.44	75.61	5.66	0	0	0	0	0	0	0	0	0	0	0	0	0	0	0	0	0	0	0	0	0	0	0	0	0	0	0	0	0	0	0	0	0	0	0	0	0	0	0
127	647663	64.53	53.44	75.61	5.66	0	0	0	0	0	0	0	0	0	0	0	0	0	0	0	0	0	0	0	0	0	0	0	0	0	0	0	0	0	0	0	0	0	0	0	0	0	0	0
128	652762	64.53	53.44	75.61	5.66	0	0	0	0	0	0	0	0	0	0	0	0	0	0	0	0	0	0	0	0	0	0	0	0	0	0	0	0	0	0	0	0	0	0	0	0	0	0	0
129	657862	64.53	53.44	75.61	5.66	0	0	0	0	0	0	0	0	0	0	0	0	0	0	0	0	0	0	0	0	0	0	0	0	0	0	0	0	0	0	0	0	0	0	0	0	0	0	0
130	662962	64.53	53.44	75.61	5.66	0	0	0	0	0	0	0	0	0	0	0	0	0	0	0	0	0	0	0	0	0	0	0	0	0	0	0	0	0	0	0	0	0	0	0	0	0	0	0
131	668061	64.53	53.44	75.62	5.66	0	0	0	0	0	0	0	0	0	0	0	0	0	0	0	0	0	0	0	0	0	0	0	0	0	0	0	0	0	0	0	0	0	0	0	0	0	0	0
132	673161	64.53	53.44	75.62	5.66	0	0	0	0	0	0	0	0	0	0	0	0	0	0	0	0	0	0	0	0	0	0	0	0	0	0	0	0	0	0	0	0	0	0	0	0	0	0	0
133	678261	64.53	53.44	75.62	5.66	0	0	0	0	0	0	0	0	0	0	0	0	0	0	0	0	0	0	0	0	0	0	0	0	0	0	0	0	0	0	0	0	0	0	0	0	0	0	0
134	683361	64.53	53.44	75.62	5.66	0	0	0	0	0	0	0	0	0	0	0	0	0	0	0	0	0	0	0	0	0	0	0	0	0	0	0	0	0	0	0	0	0	0	0	0	0	0	0
135	688460	64.53	53.44	75.62	5.66	0	0	0	0	0	0	0	0	0	0	0	0	0	0	0	0	0	0	0	0	0	0	0	0	0	0	0	0	0	0	0	0	0	0	0	0	0	0	0
136	693560	64.53	53.44	75.62	5.66	0	0	0	0	0	0	0	0	0	0	0	0	0	0	0	0	0	0	0	0	0	0	0	0	0	0	0	0	0	0	0	0	0	0	0	0	0	0	0
137	698660	64.53	53.44	75.62	5.66	0	0	0	0	0	0	0	0	0	0	0	0	0	0	0	0	0	0	0	0	0	0	0	0	0	0	0	0	0	0	0	0	0	0	0	0	0	0	0
138	703759	64.53	53.44	75.62	5.66	0	0	0	0	0	0	0	0	0	0	0	0	0	0	0	0	0	0	0	0	0	0	0	0	0	0	0	0	0	0	0	0	0	0	0	0	0	0	0
139	708859	64.53	53.44	75.62	5.66	0	0	0	0	0	0	0	0	0	0	0	0	0	0	0	0	0	0	0	0	0	0	0	0	0	0	0	0	0	0	0	0	0	0	0	0	0	0	0
140	713959	64.53	53.44	75.62	5.66	0	0	0	0	0	0	0	0	0	0	0	0	0	0	0	0	0	0	0	0	0	0	0	0	0	0	0	0	0	0	0	0	0	0	0	0	0	0	0
141	719059	64.53	53.44	75.62	5.66	0	0	0	0	0	0	0	0	0	0	0	0	0	0	0	0	0	0	0	0	0	0	0	0	0	0	0	0	0	0	0	0	0	0	0	0	0	0	0
142	724158	64.53	53.44	75.62	5.66	0	0	0	0	0	0	0	0	0	0	0	0	0	0	0	0	0	0	0	0	0	0	0	0	0	0	0	0	0	0	0	0	0	0	0	0	0	0	0
143	729258	64.53	53.44	75.62	5.66	0	0	0	0	0	0	0	0	0	0	0	0	0	0	0	0	0	0	0	0	0	0	0	0	0	0	0	0	0	0	0	0	0	0	0	0	0	0	0
144	734358	64.53	53.44	75.62	5.66	0	0	0	0	0	0	0	0	0	0	0	0	0	0	0	0	0	0	0	0	0	0	0	0	0	0	0	0	0	0	0	0	0	0	0	0	0	0	0
145	739457	64.53	53.44	75.62	5.66	0	0	0	0	0	0	0	0	0	0	0	0	0	0	0	0	0	0	0	0	0	0	0	0	0	0	0	0	0	0	0	0	0	0	0	0	0	0	0
146	744557	64.53	53.44	75.62	5.66	0	0	0	0	0	0	0	0	0	0	0	0	0	0	0	0	0	0	0	0	0	0	0	0	0	0	0	0	0	0	0	0	0	0	0	0	0	0	0
147	749657	64.53	53.44	75.62	5.66	0	0	0	0	0	0	0	0	0	0	0	0	0	0	0	0	0	0	0	0	0	0	0	0	0	0	0	0	0	0	0	0	0	0	0	0	0	0	0
148	754756	64.53	53.44	75.62	5.66	0	0	0	0	0	0	0	0	0	0	0	0	0	0	0	0	0	0	0	0	0	0	0	0	0	0	0	0	0	0	0	0	0	0	0	0	0	0	0
149	759856	64.53	53.44	75.62	5.66	0	0	0	0	0	0	0	0	0	0	0	0	0	0	0	0	0	0	0	0	0	0	0	0	0	0	0	0	0	0	0	0	0	0	0	0	0	0	0
150	764956	64.53	53.44	75.62	5.66	0	0	0	0	0	0	0	0	0	0	0	0	0	0	0	0	0	0	0	0	0	0	0	0	0	0	0	0	0	0	0	0	0	0	0	0	0	0	0
151	770056	64.53	53.44	75.62	5.66	0	0	0	0	0	0	0	0	0	0	0	0	0	0	0	0	0	0	0	0	0	0	0	0	0	0	0	0	0	0	0	0	0	0	0	0	0	0	0
152	775155	64.53	53.44	75.62	5.66	0	0	0	0	0	0	0	0	0	0	0	0	0	0	0	0	0	0	0	0	0	0	0	0	0	0	0	0	0	0	0	0	0	0	0	0	0	0	0
153	780255	64.53	53.44	75.62	5.66	0	0	0	0	0	0	0	0	0	0	0	0	0	0	0	0	0	0	0	0	0	0	0	0	0	0	0	0	0	0	0	0	0	0	0	0	0	0	0
154	785355	64.53	53.44	75.62	5.66	0	0	0	0	0	0	0	0	0	0	0	0	0	0	0	0	0	0	0	0	0	0	0	0	0	0	0	0	0	0	0	0	0	0	0	0	0	0	0
155	790454	64.53	53.44	75.62	5.66	0	0	0	0	0	0	0	0	0	0	0	0	0	0	0	0	0	0	0	0	0	0	0	0	0	0	0	0	0	0	0	0	0	0	0	0	0	0	0
156	795554	64.53	53.44	75.62	5.66	0	0	0	0	0	0	0	0	0	0	0	0	0	0	0	0	0	0	0	0	0	0	0	0	0	0	0	0	0	0	0	0	0	0	0	0	0	0	0
157	800654	64.53	53.44	75.62	5.66	0	0	0	0	0	0	0	0	0	0	0	0	0	0	0	0	0	0	0	0	0	0	0	0	0	0	0	0	0	0	0	0	0	0	0	0	0	0	0
158	805754	64.53	53.44	75.62	5.66	0	0	0	0	0	0	0	0	0	0	0	0	0	0	0	0	0	0	0	0	0	0	0	0	0	0	0	0	0	0	0	0	0	0	0	0	0	0	0
159	810853	64.53	53.44	75.62	5.66	0	0	0	0	0	0	0	0	0	0	0	0	0	0	0	0	0	0	0	0	0	0	0	0	0	0	0	0	0	0	0	0	0	0	0	0	0	0	0
160	815953	64.53	53.44	75.62	5.66	0	0	0	0	0	0	0	0	0	0	0	0	0	0	0	0	0	0	0	0	0	0	0	0	0	0	0	0	0	0	0	0	0	0	0	0	0	0	0
161	821053	64.53	53.44	75.62	5.66	0	0	0	0	0	0	0	0	0	0	0	0	0	0	0	0	0	0	0	0	0	0	0	0	0	0	0	0	0	0	0	0	0	0	0	0	0	0	0
162	826152	64.53	53.44	75.62	5.66	0	0	0	0	0	0	0	0	0	0	0	0	0	0	0	0	0	0	0	0	0	0	0	0	0	0	0	0	0	0	0	0	0	0	0	0	0	0	0
163	831252	64.53	53.44	75.62	5.66	0	0	0	0	0	0	0	0	0	0	0	0	0	0	0	0	0	0	0	0	0	0	0	0	0	0	0	0	0	0	0	0	0	0	0	0	0	0	0
164	836352	64.53	53.44	75.62	5.66	0	0	0	0	0	0	0	0	0	0	0	0	0	0	0	0	0	0	0	0	0	0	0	0	0	0	0	0	0	0	0	0	0	0	0	0	0	0	0
165	841451	64.53	53.44	75.62	5.66	0	0	0	0	0	0	0	0	0	0	0	0	0	0	0	0	0	0	0	0	0	0	0	0	0	0	0	0	0	0	0	0	0	0	0	0	0	0	0
166	846551	64.53	53.44	75.62	5.66	0	0	0	0	0	0	0	0	0	0	0	0	0	0	0	0	0	0	0	0	0	0	0	0	0	0	0	0	0	0	0	0	0	0	0	0	0	0	0
167	851651	64.53	53.44	75.62	5.66	0	0	0	0	0	0	0	0	0	0	0	0	0	0	0	0	0	0	0	0	0	0	0	0	0	0	0	0	0	0	0	0	0	0	0	0	0	0	0
168	856751	64.53	53.44	75.62	5.66	0	0	0	0	0	0	0	0	0	0	0	0	0	0	0	0	0	0	0	0	0	0	0	0	0	0	0	0	0	0	0	0	0	0	0	0	0	0	0
169	861850	64.53	53.44	75.62	5.66	0	0	0	0	0	0	0	0	0	0	0	0	0	0	0	0	0	0	0	0	0	0	0	0	0	0	0	0	0	0	0	0	0	0	0	0	0	0	0
170	866950	64.53	53.44	75.62	5.66	0	0	0	0	0	0	0	0	0	0	0	0	0	0	0	0	0	0	0	0	0	0	0	0	0	0	0	0	0	0	0	0	0	0	0	0	0	0	0
171	872050	64.53	53.44	75.62	5.66	0	0	0	0	0	0	0	0	0	0	0	0	0	0	0	0	0	0	0	0	0	0	0	0	0	0	0	0	0	0	0	0	0	0	0	0	0	0	0
172	877149	64.53	53.44	75.62	5.66	0	0	0	0	0	0	0	0	0	0	0	0	0	0	0	0	0	0	0	0	0	0	0	0	0	0	0	0	0	0	0	0	0	0	0	0	0	0	0
173	882249	64.53	53.44	75.62	5.66	0	0	0	0	0	0	0	0	0	0	0	0	0	0	0	0	0	0	0	0	0	0	0	0	0	0	0	0	0	0	0	0	0	0	0	0	0	0	0
174	887349	64.53	53.44	75.62	5.66	0	0	0	0	0	0	0	0	0	0	0	0	0	0	0	0	0	0	0	0	0	0	0	0	0	0	0	0	0	0	0	0	0	0	0	0	0	0	0
175	892449	64.53	53.44	75.62	5.66	0	0	0	0	0	0	0	0	0	0	0	0	0	0	0	0	0	0	0	0	0	0	0	0	0	0	0	0	0	0	0	0	0	0	0	0	0	0	0
176	897548	64.53	53.44	75.62	5.66	0	0	0	0	0	0	0	0	0	0	0	0	0	0	0	0	0	0	0	0	0	0	0	0	0	0	0	0	0	0	0	0	0	0	0	0	0	0	0
177	902648	64.53	53.44	75.62	5.66	0	0	0	0	0	0	0	0	0	0	0	0	0	0	0	0	0	0	0	0	0	0	0	0	0	0	0	0	0	0	0	0	0	0	0	0	0	0	0
178	907748	64.53	53.44	75.62	5.66	0	0	0	0	0	0	0	0	0	0	0	0	0	0	0	0	0	0	0	0	0	0	0	0	0	0	0	0	0	0	0	0	0	0	0	0	0	0	0
179	912847	64.53	53.44	75.62	5.66	0	0	0	0	0	0	0	0	0	0	0	0	0	0	0	0	0	0	0	0	0	0	0	0	0	0	0	0	0	0	0	0	0	0	0	0	0	0	0
180	917947	64.53	53.44	75.62	5.66	0	0	0	0	0	0	0	0	0	0	0	0	0	0	0	0	0	0	0	0	0	0	0	0	0	0	0	0	0	0	0	0	0	0	0	0	0	0	0
181	923047	64.53	53.44	75.62	5.66	0	0	0	0	0	0	0	0	0	0	0	0	0	0	0	0	0	0	0	0	0	0	0	0	0	0	0	0	0	0	0	0	0	0	0	0	0	0	0
182	928146	64.53	53.44	75.62	5.66	0	0	0	0	0	0	0	0	0	0	0	0	0	0	0	0	0	0	0	0	0	0	0	0	0	0	0	0	0	0	0	0	0	0	0	0	0	0	0
183	933246	64.53	53.44	75.62	5.66	0	0	0	0	0	0	0	0	0	0	0	0	0	0	0	0	0	0	0	0	0	0	0	0	0	0	0	0	0	0	0	0	0	0	0	0	0	0	0
184	938346	64.53	53.44	75.62	5.66	0	0	0	0	0	0	0	0	0	0	0	0	0	0	0	0	0	0	0	0	0	0	0	0	0	0	0	0	0	0	0	0	0	0	0	0	0	0	0
185	943446	64.53	53.44	75.62	5.66	0	0	0	0	0	0	0	0	0	0	0	0	0	0	0	0	0	0	0	0	0	0	0	0	0	0	0	0	0	0	0	0	0	0	0	0	0	0	0
186	948545	64.53	53.44	75.62	5.66	0	0	0	0	0	0	0	0	0	0	0	0	0	0	0	0	0	0	0	0	0	0	0	0	0	0	0	0	0	0	0	0	0	0	0	0	0	0	0
187	953645	64.53	53.44	75.62	5.66	0	0	0	0	0	0	0	0	0	0	0	0	0	0	0	0	0	0	0	0	0	0	0	0	0	0	0	0	0	0	0	0	0	0	0	0	0	0	0
188	958745	64.53	53.44	75.62	5.66	0	0	0	0	0	0	0	0	0	0	0	0	0	0	0	0	0	0	0	0	0	0	0	0	0	0	0	0	0	0	0	0	0	0	0	0	0	0	0
189	963844	64.53	53.44	75.62	5.66	0	0	0	0	0	0	0	0	0	0	0	0	0	0	0	0	0	0	0	0	0	0	0	0	0	0	0	0	0	0	0	0	0	0	0	0	0	0	0
190	968944	64.53	53.44	75.62	5.66	0	0	0	0	0	0	0	0	0	0	0	0	0	0	0	0	0	0	0	0	0	0	0	0	0	0	0	0	0	0	0	0	0	0	0	0	0	0	0
191	974044	64.53	53.44	75.62	5.66	0	0	0	0	0	0	0	0	0	0	0	0	0	0	0	0	0	0	0	0	0	0	0	0	0	0	0	0	0	0	0	0	0	0	0	0	0	0	0
192	979144	64.53	53.44	75.62	5.66	0	0	0	0	0	0	0	0	0	0	0	0	0	0	0	0	0	0	0	0	0	0	0	0	0	0	0	0	0	0	0	0	0	0	0	0	0	0	0
193	984243	64.53	53.44	75.62	5.66	0	0	0	0	0	0	0	0	0	0	0	0	0	0	0	0	0	0	0	0	0	0	0	0	0	0	0	0	0	0	0	0	0	0	0	0	0	0	0
194	989343	64.53	53.44	75.62	5.66	0	0	0	0	0	0	0	0	0	0	0	0	0	0	0	0	0	0	0	0	0	0	0	0	0	0	0	0	0	0	0	0	0	0	0	0	0	0	0
195	994443	64.53	53.44	75.62	5.66	0	0	0	0	0	0	0	0	0	0	0	0	0	0	0	0	0	0	0	0	0	0	0	0	0	0	0	0	0	0	0	0	0	0	0	0	0	0	0
196	999542	64.53	53.44	75.62	5.66	0	0	0	0	0	0	0	0	0	0	0	0	0	0	0	0	0	0	0	0	0	0	0	0	0	0	0	0	0	0	0	0	0	0	0	0	0	0	0
197	1.00464e+06	64.53	53.44	75.62	5.66	0	0	0	0	0	0	0	0	0	0	0	0	0	0	0	0	0	0	0	0	0	0	0	0	0	0	0	0	0	0	0	0	0	0	0	0	0	0	0
198	1.00974e+06	64.53	53.44	75.62	5.66	0	0	0	0	0	0	0	0	0	0	0	0	0	0	0	0	0	0	0	0	0	0	0	0	0	0	0	0	0	0	0	0	0	0	0	0	0	0	0
199	1.01484e+06	64.53	53.44	75.62	5.66	0	0	0	0	0	0	0	0	0	0	0	0	0	0	0	0	0	0	0	0	0	0	0	0	0	0	0	0	0	0	0	0	0	0	0	0	0	0	0
200	1.01994e+06	64.53	53.44	75.62	5.66	0	0	0	0	0	0	0	0	0	0	0	0	0	0	0	0	0	0	0	0	0	0	0	0	0	0	0	0	0	0	0	0	0	0	0	0	0	0	0
201	1.02504e+06	64.53	53.44	75.62	5.66	0	0	0	0	0	0	0	0	0	0	0	0	0	0	0	0	0	0	0	0	0	0	0	0	0	0	0	0	0	0	0	0	0	0	0	0	0	0	0
202	1.03014e+06	64.53	53.44	75.62	5.66	0	0	0	0	0	0	0	0	0	0	0	0	0	0	0	0	0	0	0	0	0	0	0	0	0	0	0	0	0	0	0	0	0	0	0	0	0	0	0
203	1.03524e+06	64.53	53.44	75.62	5.66	0	0	0	0	0	0	0	0	0	0	0	0	0	0	0	0	0	0	0	0	0	0	0	0	0	0	0	0	0	0	0	0	0	0	0	0	0	0	0
204	1040340	64.53	53.44	75.62	5.66	0	0	0	0	0	0	0	0	0	0	0	0	0	0	0	0	0	0	0	0	0	0	0	0	0	0	0	0	0	0	0	0	0	0	0	0	0	0	0
205	1.04544e+06	64.53	53.44	75.62	5.66	0	0	0	0	0	0	0	0	0	0	0	0	0	0	0	0	0	0	0	0	0	0	0	0	0	0	0	0	0	0	0	0	0	0	0	0	0	0	0
206	1.05054e+06	64.53	53.44	75.62	5.66	0	0	0	0	0	0	0	0	0	0	0	0	0	0	0	0	0	0	0	0	0	0	0	0	0	0	0	0	0	0	0	0	0	0	0	0	0	0	0
207	1.05564e+06	64.53	53.44	75.62	5.66	0	0	0	0	0	0	0	0	0	0	0	0	0	0	0	0	0	0	0	0	0	0	0	0	0	0	0	0	0	0	0	0	0	0	0	0	0	0	0
208	1.06074e+06	64.53	53.44	75.62	5.66	0	0	0	0	0	0	0	0	0	0	0	0	0	0	0	0	0	0	0	0	0	0	0	0	0	0	0	0	0	0	0	0	0	0	0	0	0	0	0
209	1.06584e+06	64.53	53.44	75.62	5.66	0	0	0	0	0	0	0	0	0	0	0	0	0	0	0	0	0	0	0	0	0	0	0	0	0	0	0	0	0	0	0	0	0	0	0	0	0	0	0
210	1.07094e+06	64.53	53.44	75.62	5.66	0	0	0	0	0	0	0	0	0	0	0	0	0	0	0	0	0	0	0	0	0	0	0	0	0	0	0	0	0	0	0	0	0	0	0	0	0	0	0
211	1.07604e+06	64.53	53.44	75.62	5.66	0	0	0	0	0	0	0	0	0	0	0	0	0	0	0	0	0	0	0	0	0	0	0	0	0	0	0	0	0	0	0	0	0	0	0	0	0	0	0
212	1.08114e+06	64.53	53.44	75.62	5.66	0	0	0	0	0	0	0	0	0	0	0	0	0	0	0	0	0	0	0	0	0	0	0	0	0	0	0	0	0	0	0	0	0	0	0	0	0	0	0
213	1.08624e+06	64.53	53.44	75.62	5.66	0	0	0	0	0	0	0	0	0	0	0	0	0	0	0	0	0	0	0	0	0	0	0	0	0	0	0	0	0	0	0	0	0	0	0	0	0	0	0
214	1.09134e+06	64.53	53.44	75.62	5.66	0	0	0	0	0	0	0	0	0	0	0	0	0	0	0	0	0	0	0	0	0	0	0	0	0	0	0	0	0	0	0	0	0	0	0	0	0	0	0
215	1.09644e+06	64.53	53.44	75.62	5.66	0	0	0	0	0	0	0	0	0	0	0	0	0	0	0	0	0	0	0	0	0	0	0	0	0	0	0	0	0	0	0	0	0	0	0	0	0	0	0
216	1.10154e+06	64.53	53.44	75.62	5.66	0	0	0	0	0	0	0	0	0	0	0	0	0	0	0	0	0	0	0	0	0	0	0	0	0	0	0	0	0	0	0	0	0	0	0	0	0	0	0
217	1.10664e+06	64.53	53.44	75.62	5.66	0	0	0	0	0	0	0	0	0	0	0	0	0	0	0	0	0	0	0	0	0	0	0	0	0	0	0	0	0	0	0	0	0	0	0	0	0	0	0
218	1.11174e+06	64.53	53.44	75.62	5.66	0	0	0	0	0	0	0	0	0	0	0	0	0	0	0	0	0	0	0	0	0	0	0	0	0	0	0	0	0	0	0	0	0	0	0	0	0	0	0
219	1.11684e+06	64.53	53.44	75.62	5.66	0	0	0	0	0	0	0	0	0	0	0	0	0	0	0	0	0	0	0	0	0	0	0	0	0	0	0	0	0	0	0	0	0	0	0	0	0	0	0
220	1.12194e+06	64.53	53.44	75.62	5.66	0	0	0	0	0	0	0	0	0	0	0	0	0	0	0	0	0	0	0	0	0	0	0	0	0	0	0	0	0	0	0	0	0	0	0	0	0	0	0
221	1127035	64.53	53.44	75.62	5.66	0	0	0	0	0	0	0	0	0	0	0	0	0	0	0	0	0	0	0	0	0	0	0	0	0	0	0	0	0	0	0	0	0	0	0	0	0	0	0
222	1.13213e+06	64.53	53.44	75.62	5.66	0	0	0	0	0	0	0	0	0	0	0	0	0	0	0	0	0	0	0	0	0	0	0	0	0	0	0	0	0	0	0	0	0	0	0	0	0	0	0
223	1.13723e+06	64.53	53.44	75.62	5.66	0	0	0	0	0	0	0	0	0	0	0	0	0	0	0	0	0	0	0	0	0	0	0	0	0	0	0	0	0	0	0	0	0	0	0	0	0	0	0
224	1.14233e+06	64.53	53.44	75.62	5.66	0	0	0	0	0	0	0	0	0	0	0	0	0	0	0	0	0	0	0	0	0	0	0	0	0	0	0	0	0	0	0	0	0	0	0	0	0	0	0
225	1.14743e+06	64.53	53.44	75.62	5.66	0	0	0	0	0	0	0	0	0	0	0	0	0	0	0	0	0	0	0	0	0	0	0	0	0	0	0	0	0	0	0	0	0	0	0	0	0	0	0
226	1.15253e+06	64.53	53.44	75.62	5.66	0	0	0	0	0	0	0	0	0	0	0	0	0	0	0	0	0	0	0	0	0	0	0	0	0	0	0	0	0	0	0	0	0	0	0	0	0	0	0
227	1.15763e+06	64.53	53.44	75.62	5.66	0	0	0	0	0	0	0	0	0	0	0	0	0	0	0	0	0	0	0	0	0	0	0	0	0	0	0	0	0	0	0	0	0	0	0	0	0	0	0
228	1.16273e+06	64.53	53.44	75.62	5.66	0	0	0	0	0	0	0	0	0	0	0	0	0	0	0	0	0	0	0	0	0	0	0	0	0	0	0	0	0	0	0	0	0	0	0	0	0	0	0
229	1.16783e+06	64.53	53.44	75.62	5.66	0	0	0	0	0	0	0	0	0	0	0	0	0	0	0	0	0	0	0	0	0	0	0	0	0	0	0	0	0	0	0	0	0	0	0	0	0	0	0
230	1.17293e+06	64.53	53.44	75.62	5.66	0	0	0	0	0	0	0	0	0	0	0	0	0	0	0	0	0	0	0	0	0	0	0	0	0	0	0	0	0	0	0	0	0	0	0	0	0	0	0
231	1.17803e+06	64.53	53.44	75.62	5.66	0	0	0	0	0	0	0	0	0	0	0	0	0	0	0	0	0	0	0	0	0	0	0	0	0	0	0	0	0	0	0	0	0	0	0	0	0	0	0
232	1.18313e+06	64.53	53.44	75.62	5.66	0	0	0	0	0	0	0	0	0	0	0	0	0	0	0	0	0	0	0	0	0	0	0	0	0	0	0	0	0	0	0	0	0	0	0	0	0	0	0
233	1.18823e+06	64.53	53.44	75.62	5.66	0	0	0	0	0	0	0	0	0	0	0	0	0	0	0	0	0	0	0	0	0	0	0	0	0	0	0	0	0	0	0	0	0	0	0	0	0	0	0
234	1.19333e+06	64.53	53.44	75.62	5.66	0	0	0	0	0	0	0	0	0	0	0	0	0	0	0	0	0	0	0	0	0	0	0	0	0	0	0	0	0	0	0	0	0	0	0	0	0	0	0
235	1.19843e+06	64.53	53.44	75.62	5.66	0	0	0	0	0	0	0	0	0	0	0	0	0	0	0	0	0	0	0	0	0	0	0	0	0	0	0	0	0	0	0	0	0	0	0	0	0	0	0
236	1.20353e+06	64.53	53.44	75.62	5.66	0	0	0	0	0	0	0	0	0	0	0	0	0	0	0	0	0	0	0	0	0	0	0	0	0	0	0	0	0	0	0	0	0	0	0	0	0	0	0
237	1.20863e+06	64.53	53.44	75.62	5.66	0	0	0	0	0	0	0	0	0	0	0	0	0	0	0	0	0	0	0	0	0	0	0	0	0	0	0	0	0	0	0	0	0	0	0	0	0	0	0
238	1213730	64.53	53.44	75.62	5.66	0	0	0	0	0	0	0	0	0	0	0	0	0	0	0	0	0	0	0	0	0	0	0	0	0	0	0	0	0	0	0	0	0	0	0	0	0	0	0
239	1.21883e+06	64.53	53.44	75.62	5.66	0	0	0	0	0	0	0	0	0	0	0	0	0	0	0	0	0	0	0	0	0	0	0	0	0	0	0	0	0	0	0	0	0	0	0	0	0	0	0
240	1.22393e+06	64.53	53.44	75.62	5.66	0	0	0	0	0	0	0	0	0	0	0	0	0	0	0	0	0	0	0	0	0	0	0	0	0	0	0	0	0	0	0	0	0	0	0	0	0	0	0
241	1.22903e+06	64.53	53.44	75.62	5.66	0	0	0	0	0	0	0	0	0	0	0	0	0	0	0	0	0	0	0	0	0	0	0	0	0	0	0	0	0	0	0	0	0	0	0	0	0	0	0
242	1.23413e+06	64.53	53.44	75.62	5.66	0	0	0	0	0	0	0	0	0	0	0	0	0	0	0	0	0	0	0	0	0	0	0	0	0	0	0	0	0	0	0	0	0	0	0	0	0	0	0
243	1.23923e+06	64.53	53.44	75.62	5.66	0	0	0	0	0	0	0	0	0	0	0	0	0	0	0	0	0	0	0	0	0	0	0	0	0	0	0	0	0	0	0	0	0	0	0	0	0	0	0
244	1.24433e+06	64.53	53.44	75.62	5.66	0	0	0	0	0	0	0	0	0	0	0	0	0	0	0	0	0	0	0	0	0	0	0	0	0	0	0	0	0	0	0	0	0	0	0	0	0	0	0
245	1.24943e+06	64.53	53.44	75.62	5.66	0	0	0	0	0	0	0	0	0	0	0	0	0	0	0	0	0	0	0	0	0	0	0	0	0	0	0	0	0	0	0	0	0	0	0	0	0	0	0
246	1.25453e+06	64.53	53.44	75.62	5.66	0	0	0	0	0	0	0	0	0	0	0	0	0	0	0	0	0	0	0	0	0	0	0	0	0	0	0	0	0	0	0	0	0	0	0	0	0	0	0
247	1.25963e+06	64.53	53.44	75.62	5.66	0	0	0	0	0	0	0	0	0	0	0	0	0	0	0	0	0	0	0	0	0	0	0	0	0	0	0	0	0	0	0	0	0	0	0	0	0	0	0
248	1.26473e+06	64.53	53.44	75.62	5.66	0	0	0	0	0	0	0	0	0	0	0	0	0	0	0	0	0	0	0	0	0	0	0	0	0	0	0	0	0	0	0	0	0	0	0	0	0	0	0
249	1.26983e+06	64.53	53.44	75.62	5.66	0	0	0	0	0	0	0	0	0	0	0	0	0	0	0	0	0	0	0	0	0	0	0	0	0	0	0	0	0	0	0	0	0	0	0	0	0	0	0
250	1.27493e+06	64.53	53.44	75.62	5.66	0	0	0	0	0	0	0	0	0	0	0	0	0	0	0	0	0	0	0	0	0	0	0	0	0	0	0	0	0	0	0	0	0	0	0	0	0	0	0
251	1.28003e+06	64.53	53.44	75.62	5.66	0	0	0	0	0	0	0	0	0	0	0	0	0	0	0	0	0	0	0	0	0	0	0	0	0	0	0	0	0	0	0	0	0	0	0	0	0	0	0
252	1.28513e+06	64.53	53.44	75.62	5.66	0	0	0	0	0	0	0	0	0	0	0	0	0	0	0	0	0	0	0	0	0	0	0	0	0	0	0	0	0	0	0	0	0	0	0	0	0	0	0
253	1.29023e+06	64.53	53.44	75.62	5.66	0	0	0	0	0	0	0	0	0	0	0	0	0	0	0	0	0	0	0	0	0	0	0	0	0	0	0	0	0	0	0	0	0	0	0	0	0	0	0
254	1.29533e+06	64.53	53.44	75.62	5.66	0	0	0	0	0	0	0	0	0	0	0	0	0	0	0	0	0	0	0	0	0	0	0	0	0	0	0	0	0	0	0	0	0	0	0	0	0	0	0
255	1300425	64.53	53.44	75.62	5.66	0	0	0	0	0	0	0	0	0	0	0	0	0	0	0	0	0	0	0	0	0	0	0	0	0	0	0	0	0	0	0	0	0	0	0	0	0	0	0
256	1.30552e+06	64.53	53.44	75.62	5.66	0	0	0	0	0	0	0	0	0	0	0	0	0	0	0	0	0	0	0	0	0	0	0	0	0	0	0	0	0	0	0	0	0	0	0	0	0	0	0
257	1.31062e+06	64.53	53.44	75.62	5.66	0	0	0	0	0	0	0	0	0	0	0	0	0	0	0	0	0	0	0	0	0	0	0	0	0	0	0	0	0	0	0	0	0	0	0	0	0	0	0
258	1.31572e+06	64.53	53.44	75.62	5.66	0	0	0	0	0	0	0	0	0	0	0	0	0	0	0	0	0	0	0	0	0	0	0	0	0	0	0	0	0	0	0	0	0	0	0	0	0	0	0
259	1.32082e+06	64.53	53.44	75.62	5.66	0	0	0	0	0	0	0	0	0	0	0	0	0	0	0	0	0	0	0	0	0	0	0	0	0	0	0	0	0	0	0	0	0	0	0	0	0	0	0
260	1.32592e+06	64.53	53.44	75.62	5.66	0	0	0	0	0	0	0	0	0	0	0	0	0	0	0	0	0	0	0	0	0	0	0	0	0	0	0	0	0	0	0	0	0	0	0	0	0	0	0
261	1.33102e+06	64.53	53.44	75.62	5.66	0	0	0	0	0	0	0	0	0	0	0	0	0	0	0	0	0	0	0	0	0	0	0	0	0	0	0	0	0	0	0	0	0	0	0	0	0	0	0
262	1.33612e+06	64.53	53.44	75.62	5.66	0	0	0	0	0	0	0	0	0	0	0	0	0	0	0	0	0	0	0	0	0	0	0	0	0	0	0	0	0	0	0	0	0	0	0	0	0	0	0
263	1.34122e+06	64.53	53.44	75.62	5.66	0	0	0	0	0	0	0	0	0	0	0	0	0	0	0	0	0	0	0	0	0	0	0	0	0	0	0	0	0	0	0	0	0	0	0	0	0	0	0
264	1.34632e+06	64.53	53.44	75.62	5.66	0	0	0	0	0	0	0	0	0	0	0	0	0	0	0	0	0	0	0	0	0	0	0	0	0	0	0	0	0	0	0	0	0	0	0	0	0	0	0
265	1.35142e+06	64.53	53.44	75.62	5.66	0	0	0	0	0	0	0	0	0	0	0	0	0	0	0	0	0	0	0	0	0	0	0	0	0	0	0	0	0	0	0	0	0	0	0	0	0	0	0
266	1.35652e+06	64.53	53.44	75.62	5.66	0	0	0	0	0	0	0	0	0	0	0	0	0	0	0	0	0	0	0	0	0	0	0	0	0	0	0	0	0	0	0	0	0	0	0	0	0	0	0
267	1.36162e+06	64.53	53.44	75.62	5.66	0	0	0	0	0	0	0	0	0	0	0	0	0	0	0	0	0	0	0	0	0	0	0	0	0	0	0	0	0	0	0	0	0	0	0	0	0	0	0
268	1.36672e+06	64.53	53.44	75.62	5.66	0	0	0	0	0	0	0	0	0	0	0	0	0	0	0	0	0	0	0	0	0	0	0	0	0	0	0	0	0	0	0	0	0	0	0	0	0	0	0
269	1.37182e+06	64.53	53.44	75.62	5.66	0	0	0	0	0	0	0	0	0	0	0	0	0	0	0	0	0	0	0	0	0	0	0	0	0	0	0	0	0	0	0	0	0	0	0	0	0	0	0
270	1.37692e+06	64.53	53.44	75.62	5.66	0	0	0	0	0	0	0	0	0	0	0	0	0	0	0	0	0	0	0	0	0	0	0	0	0	0	0	0	0	0	0	0	0	0	0	0	0	0	0
271	1.38202e+06	64.53	53.44	75.62	5.66	0	0	0	0	0	0	0	0	0	0	0	0	0	0	0	0	0	0	0	0	0	0	0	0	0	0	0	0	0	0	0	0	0	0	0	0	0	0	0
272	1387120	64.53	53.44	75.62	5.66	0	0	0	0	0	0	0	0	0	0	0	0	0	0	0	0	0	0	0	0	0	0	0	0	0	0	0	0	0	0	0	0	0	0	0	0	0	0	0
273	1.39222e+06	64.53	53.44	75.62	5.66	0	0	0	0	0	0	0	0	0	0	0	0	0	0	0	0	0	0	0	0	0	0	0	0	0	0	0	0	0	0	0	0	0	0	0	0	0	0	0
274	1.39732e+06	64.53	53.44	75.62	5.66	0	0	0	0	0	0	0	0	0	0	0	0	0	0	0	0	0	0	0	0	0	0	0	0	0	0	0	0	0	0	0	0	0	0	0	0	0	0	0
275	1.40242e+06	64.53	53.44	75.62	5.66	0	0	0	0	0	0	0	0	0	0	0	0	0	0	0	0	0	0	0	0	0	0	0	0	0	0	0	0	0	0	0	0	0	0	0	0	0	0	0
276	1.40752e+06	64.53	53.44	75.62	5.66	0	0	0	0	0	0	0	0	0	0	0	0	0	0	0	0	0	0	0	0	0	0	0	0	0	0	0	0	0	0	0	0	0	0	0	0	0	0	0
277	1.41262e+06	64.53	53.44	75.62	5.66	0	0	0	0	0	0	0	0	0	0	0	0	0	0	0	0	0	0	0	0	0	0	0	0	0	0	0	0	0	0	0	0	0	0	0	0	0	0	0
278	1.41772e+06	64.53	53.44	75.62	5.66	0	0	0	0	0	0	0	0	0	0	0	0	0	0	0	0	0	0	0	0	0	0	0	0	0	0	0	0	0	0	0	0	0	0	0	0	0	0	0
279	1.42282e+06	64.53	53.44	75.62	5.66	0	0	0	0	0	0	0	0	0	0	0	0	0	0	0	0	0	0	0	0	0	0	0	0	0	0	0	0	0	0	0	0	0	0	0	0	0	0	0
280	1.42792e+06	64.53	53.44	75.62	5.66	0	0	0	0	0	0	0	0	0	0	0	0	0	0	0	0	0	0	0	0	0	0	0	0	0	0	0	0	0	0	0	0	0	0	0	0	0	0	0
281	1.43302e+06	64.53	53.44	75.62	5.66	0	0	0	0	0	0	0	0	0	0	0	0	0	0	0	0	0	0	0	0	0	0	0	0	0	0	0	0	0	0	0	0	0	0	0	0	0	0	0
282	1.43812e+06	64.53	53.44	75.62	5.66	0	0	0	0	0	0	0	0	0	0	0	0	0	0	0	0	0	0	0	0	0	0	0	0	0	0	0	0	0	0	0	0	0	0	0	0	0	0	0
283	1.44322e+06	64.53	53.44	75.62	5.66	0	0	0	0	0	0	0	0	0	0	0	0	0	0	0	0	0	0	0	0	0	0	0	0	0	0	0	0	0	0	0	0	0	0	0	0	0	0	0
284	1.44832e+06	64.53	53.44	75.62	5.66	0	0	0	0	0	0	0	0	0	0	0	0	0	0	0	0	0	0	0	0	0	0	0	0	0	0	0	0	0	0	0	0	0	0	0	0	0	0	0
285	1.45342e+06	64.53	53.44	75.62	5.66	0	0	0	0	0	0	0	0	0	0	0	0	0	0	0	0	0	0	0	0	0	0	0	0	0	0	0	0	0	0	0	0	0	0	0	0	0	0	0
286	1.45852e+06	64.53	53.44	75.62	5.66	0	0	0	0	0	0	0	0	0	0	0	0	0	0	0	0	0	0	0	0	0	0	0	0	0	0	0	0	0	0	0	0	0	0	0	0	0	0	0
287	1.46362e+06	64.53	53.44	75.62	5.66	0	0	0	0	0	0	0	0	0	0	0	0	0	0	0	0	0	0	0	0	0	0	0	0	0	0	0	0	0	0	0	0	0	0	0	0	0	0	0
288	1.46872e+06	64.53	53.44	75.62	5.66	0	0	0	0	0	0	0	0	0	0	0	0	0	0	0	0	0	0	0	0	0	0	0	0	0	0	0	0	0	0	0	0	0	0	0	0	0	0	0
289	1473815	64.53	53.44	75.62	5.66	0	0	0	0	0	0	0	0	0	0	0	0	0	0	0	0	0	0	0	0	0	0	0	0	0	0	0	0	0	0	0	0	0	0	0	0	0	0	0
290	1.47891e+06	64.53	53.44	75.62	5.66	0	0	0	0	0	0	0	0	0	0	0	0	0	0	0	0	0	0	0	0	0	0	0	0	0	0	0	0	0	0	0	0	0	0	0	0	0	0	0
291	1.48401e+06	64.53	53.44	75.62	5.66	0	0	0	0	0	0	0	0	0	0	0	0	0	0	0	0	0	0	0	0	0	0	0	0	0	0	0	0	0	0	0	0	0	0	0	0	0	0	0
292	1.48911e+06	64.53	53.44	75.62	5.66	0	0	0	0	0	0	0	0	0	0	0	0	0	0	0	0	0	0	0	0	0	0	0	0	0	0	0	0	0	0	0	0	0	0	0	0	0	0	0
293	1.49421e+06	64.53	53.44	75.62	5.66	0	0	0	0	0	0	0	0	0	0	0	0	0	0	0	0	0	0	0	0	0	0	0	0	0	0	0	0	0	0	0	0	0	0	0	0	0	0	0
294	1.49931e+06	64.53	53.44	75.62	5.66	0	0	0	0	0	0	0	0	0	0	0	0	0	0	0	0	0	0	0	0	0	0	0	0	0	0	0	0	0	0	0	0	0	0	0	0	0	0	0
295	1.50441e+06	64.53	53.44	75.62	5.66	0	0	0	0	0	0	0	0	0	0	0	0	0	0	0	0	0	0	0	0	0	0	0	0	0	0	0	0	0	0	0	0	0	0	0	0	0	0	0
296	1.50951e+06	64.53	53.44	75.62	5.66	0	0	0	0	0	0	0	0	0	0	0	0	0	0	0	0	0	0	0	0	0	0	0	0	0	0	0	0	0	0	0	0	0	0	0	0	0	0	0
297	1.51461e+06	64.53	53.44	75.62	5.66	0	0	0	0	0	0	0	0	0	0	0	0	0	0	0	0	0	0	0	0	0	0	0	0	0	0	0	0	0	0	0	0	0	0	0	0	0	0	0
298	1.51971e+06	64.53	53.44	75.62	5.66	0	0	0	0	0	0	0	0	0	0	0	0	0	0	0	0	0	0	0	0	0	0	0	0	0	0	0	0	0	0	0	0	0	0	0	0	0	0	0
299	1.52481e+06	64.53	53.44	75.62	5.66	0	0	0	0	0	0	0	0	0	0	0	0	0	0	0	0	0	0	0	0	0	0	0	0	0	0	0	0	0	0	0	0	0	0	0	0	0	0	0
300	1.52991e+06	64.53	53.44	75.62	5.66	0	0	0	0	0	0	0	0	0	0	0	0	0	0	0	0	0	0	0	0	0	0	0	0	0	0	0	0	0	0	0	0	0	0	0	0	0	0	0
301	1.53501e+06	64.53	53.44	75.62	5.66	0	0	0	0	0	0	0	0	0	0	0	0	0	0	0	0	0	0	0	0	0	0	0	0	0	0	0	0	0	0	0	0	0	0	0	0	0	0	0
302	1.54011e+06	64.53	53.44	75.62	5.66	0	0	0	0	0	0	0	0	0	0	0	0	0	0	0	0	0	0	0	0	0	0	0	0	0	0	0	0	0	0	0	0	0	0	0	0	0	0	0
303	1.54521e+06	64.53	53.44	75.62	5.66	0	0	0	0	0	0	0	0	0	0	0	0	0	0	0	0	0	0	0	0	0	0	0	0	0	0	0	0	0	0	0	0	0	0	0	0	0	0	0
304	1.55031e+06	64.53	53.44	75.62	5.66	0	0	0	0	0	0	0	0	0	0	0	0	0	0	0	0	0	0	0	0	0	0	0	0	0	0	0	0	0	0	0	0	0	0	0	0	0	0	0
305	1.55541e+06	64.53	53.44	75.62	5.66	0	0	0	0	0	0	0	0	0	0	0	0	0	0	0	0	0	0	0	0	0	0	0	0	0	0	0	0	0	0	0	0	0	0	0	0	0	0	0
306	1560510	64.53	53.44	75.62	5.66	0	0	0	0	0	0	0	0	0	0	0	0	0	0	0	0	0	0	0	0	0	0	0	0	0	0	0	0	0	0	0	0	0	0	0	0	0	0	0
307	1.56561e+06	64.53	53.44	75.62	5.66	0	0	0	0	0	0	0	0	0	0	0	0	0	0	0	0	0	0	0	0	0	0	0	0	0	0	0	0	0	0	0	0	0	0	0	0	0	0	0
308	1.57071e+06	64.53	53.44	75.62	5.66	0	0	0	0	0	0	0	0	0	0	0	0	0	0	0	0	0	0	0	0	0	0	0	0	0	0	0	0	0	0	0	0	0	0	0	0	0	0	0
309	1.57581e+06	64.53	53.44	75.62	5.66	0	0	0	0	0	0	0	0	0	0	0	0	0	0	0	0	0	0	0	0	0	0	0	0	0	0	0	0	0	0	0	0	0	0	0	0	0	0	0
310	1.58091e+06	64.53	53.44	75.62	5.66	0	0	0	0	0	0	0	0	0	0	0	0	0	0	0	0	0	0	0	0	0	0	0	0	0	0	0	0	0	0	0	0	0	0	0	0	0	0	0
311	1.58601e+06	64.53	53.44	75.62	5.66	0	0	0	0	0	0	0	0	0	0	0	0	0	0	0	0	0	0	0	0	0	0	0	0	0	0	0	0	0	0	0	0	0	0	0	0	0	0	0
312	1.59111e+06	64.53	53.44	75.62	5.66	0	0	0	0	0	0	0	0	0	0	0	0	0	0	0	0	0	0	0	0	0	0	0	0	0	0	0	0	0	0	0	0	0	0	0	0	0	0	0
313	1.59621e+06	64.53	53.44	75.62	5.66	0	0	0	0	0	0	0	0	0	0	0	0	0	0	0	0	0	0	0	0	0	0	0	0	0	0	0	0	0	0	0	0	0	0	0	0	0	0	0
314	1.60131e+06	64.53	53.44	75.62	5.66	0	0	0	0	0	0	0	0	0	0	0	0	0	0	0	0	0	0	0	0	0	0	0	0	0	0	0	0	0	0	0	0	0	0	0	0	0	0	0
315	1.60641e+06	64.53	53.44	75.62	5.66	0	0	0	0	0	0	0	0	0	0	0	0	0	0	0	0	0	0	0	0	0	0	0	0	0	0	0	0	0	0	0	0	0	0	0	0	0	0	0
316	1.61151e+06	64.53	53.44	75.62	5.66	0	0	0	0	0	0	0	0	0	0	0	0	0	0	0	0	0	0	0	0	0	0	0	0	0	0	0	0	0	0	0	0	0	0	0	0	0	0	0
317	1.61661e+06	64.53	53.44	75.62	5.66	0	0	0	0	0	0	0	0	0	0	0	0	0	0	0	0	0	0	0	0	0	0	0	0	0	0	0	0	0	0	0	0	0	0	0	0	0	0	0
318	1.62171e+06	64.53	53.44	75.62	5.66	0	0	0	0	0	0	0	0	0	0	0	0	0	0	0	0	0	0	0	0	0	0	0	0	0	0	0	0	0	0	0	0	0	0	0	0	0	0	0
319	1.62681e+06	64.53	53.44	75.62	5.66	0	0	0	0	0	0	0	0	0	0	0	0	0	0	0	0	0	0	0	0	0	0	0	0	0	0	0	0	0	0	0	0	0	0	0	0	0	0	0
320	1.63191e+06	64.53	53.44	75.62	5.66	0	0	0	0	0	0	0	0	0	0	0	0	0	0	0	0	0	0	0	0	0	0	0	0	0	0	0	0	0	0	0	0	0	0	0	0	0	0	0
321	1.63701e+06	64.53	53.44	75.62	5.66	0	0	0	0	0	0	0	0	0	0	0	0	0	0	0	0	0	0	0	0	0	0	0	0	0	0	0	0	0	0	0	0	0	0	0	0	0	0	0
322	1.64211e+06	64.53	53.44	75.62	5.66	0	0	0	0	0	0	0	0	0	0	0	0	0	0	0	0	0	0	0	0	0	0	0	0	0	0	0	0	0	0	0	0	0	0	0	0	0	0	0
323	1647205	64.53	53.44	75.62	5.66	0	0	0	0	0	0	0	0	0	0	0	0	0	0	0	0	0	0	0	0	0	0	0	0	0	0	0	0	0	0	0	0	0	0	0	0	0	0	0
324	1.6523e+06	64.53	53.44	75.62	5.66	0	0	0	0	0	0	0	0	0	0	0	0	0	0	0	0	0	0	0	0	0	0	0	0	0	0	0	0	0	0	0	0	0	0	0	0	0	0	0
325	1.6574e+06	64.53	53.44	75.62	5.66	0	0	0	0	0	0	0	0	0	0	0	0	0	0	0	0	0	0	0	0	0	0	0	0	0	0	0	0	0	0	0	0	0	0	0	0	0	0	0
326	1.6625e+06	64.53	53.44	75.62	5.66	0	0	0	0	0	0	0	0	0	0	0	0	0	0	0	0	0	0	0	0	0	0	0	0	0	0	0	0	0	0	0	0	0	0	0	0	0	0	0
327	1.6676e+06	64.53	53.44	75.62	5.66	0	0	0	0	0	0	0	0	0	0	0	0	0	0	0	0	0	0	0	0	0	0	0	0	0	0	0	0	0	0	0	0	0	0	0	0	0	0	0
328	1.6727e+06	64.53	53.44	75.62	5.66	0	0	0	0	0	0	0	0	0	0	0	0	0	0	0	0	0	0	0	0	0	0	0	0	0	0	0	0	0	0	0	0	0	0	0	0	0	0	0
329	1.6778e+06	64.53	53.44	75.62	5.66	0	0	0	0	0	0	0	0	0	0	0	0	0	0	0	0	0	0	0	0	0	0	0	0	0	0	0	0	0	0	0	0	0	0	0	0	0	0	0
330	1.6829e+06	64.53	53.44	75.62	5.66	0	0	0	0	0	0	0	0	0	0	0	0	0	0	0	0	0	0	0	0	0	0	0	0	0	0	0	0	0	0	0	0	0	0	0	0	0	0	0
331	1.688e+06	64.53	53.44	75.62	5.66	0	0	0	0	0	0	0	0	0	0	0	0	0	0	0	0	0	0	0	0	0	0	0	0	0	0	0	0	0	0	0	0	0	0	0	0	0	0	0
332	1.6931e+06	64.53	53.44	75.62	5.66	0	0	0	0	0	0	0	0	0	0	0	0	0	0	0	0	0	0	0	0	0	0	0	0	0	0	0	0	0	0	0	0	0	0	0	0	0	0	0
333	1.6982e+06	64.53	53.44	75.62	5.66	0	0	0	0	0	0	0	0	0	0	0	0	0	0	0	0	0	0	0	0	0	0	0	0	0	0	0	0	0	0	0	0	0	0	0	0	0	0	0
334	1.7033e+06	64.53	53.44	75.62	5.66	0	0	0	0	0	0	0	0	0	0	0	0	0	0	0	0	0	0	0	0	0	0	0	0	0	0	0	0	0	0	0	0	0	0	0	0	0	0	0
335	1.7084e+06	64.53	53.44	75.62	5.66	0	0	0	0	0	0	0	0	0	0	0	0	0	0	0	0	0	0	0	0	0	0	0	0	0	0	0	0	0	0	0	0	0	0	0	0	0	0	0
336	1.7135e+06	64.53	53.44	75.62	5.66	0	0	0	0	0	0	0	0	0	0	0	0	0	0	0	0	0	0	0	0	0	0	0	0	0	0	0	0	0	0	0	0	0	0	0	0	0	0	0
337	1.7186e+06	64.53	53.44	75.62	5.66	0	0	0	0	0	0	0	0	0	0	0	0	0	0	0	0	0	0	0	0	0	0	0	0	0	0	0	0	0	0	0	0	0	0	0	0	0	0	0
338	1.7237e+06	64.53	53.44	75.62	5.66	0	0	0	0	0	0	0	0	0	0	0	0	0	0	0	0	0	0	0	0	0	0	0	0	0	0	0	0	0	0	0	0	0	0	0	0	0	0	0
339	1.7288e+06	64.53	53.44	75.62	5.66	0	0	0	0	0	0	0	0	0	0	0	0	0	0	0	0	0	0	0	0	0	0	0	0	0	0	0	0	0	0	0	0	0	0	0	0	0	0	0
340	1733900	64.53	53.44	75.62	5.66	0	0	0	0	0	0	0	0	0	0	0	0	0	0	0	0	0	0	0	0	0	0	0	0	0	0	0	0	0	0	0	0	0	0	0	0	0	0	0
341	1.739e+06	64.53	53.44	75.62	5.66	0	0	0	0	0	0	0	0	0	0	0	0	0	0	0	0	0	0	0	0	0	0	0	0	0	0	0	0	0	0	0	0	0	0	0	0	0	0	0
342	1.7441e+06	64.53	53.44	75.62	5.66	0	0	0	0	0	0	0	0	0	0	0	0	0	0	0	0	0	0	0	0	0	0	0	0	0	0	0	0	0	0	0	0	0	0	0	0	0	0	0
343	1.7492e+06	64.53	53.44	75.62	5.66	0	0	0	0	0	0	0	0	0	0	0	0	0	0	0	0	0	0	0	0	0	0	0	0	0	0	0	0	0	0	0	0	0	0	0	0	0	0	0
344	1.7543e+06	64.53	53.44	75.62	5.66	0	0	0	0	0	0	0	0	0	0	0	0	0	0	0	0	0	0	0	0	0	0	0	0	0	0	0	0	0	0	0	0	0	0	0	0	0	0	0
345	1.7594e+06	64.53	53.44	75.62	5.66	0	0	0	0	0	0	0	0	0	0	0	0	0	0	0	0	0	0	0	0	0	0	0	0	0	0	0	0	0	0	0	0	0	0	0	0	0	0	0
346	1.7645e+06	64.53	53.44	75.62	5.66	0	0	0	0	0	0	0	0	0	0	0	0	0	0	0	0	0	0	0	0	0	0	0	0	0	0	0	0	0	0	0	0	0	0	0	0	0	0	0
347	1.7696e+06	64.53	53.44	75.62	5.66	0	0	0	0	0	0	0	0	0	0	0	0	0	0	0	0	0	0	0	0	0	0	0	0	0	0	0	0	0	0	0	0	0	0	0	0	0	0	0
348	1.7747e+06	64.53	53.44	75.62	5.66	0	0	0	0	0	0	0	0	0	0	0	0	0	0	0	0	0	0	0	0	0	0	0	0	0	0	0	0	0	0	0	0	0	0	0	0	0	0	0
349	1.7798e+06	64.53	53.44	75.62	5.66	0	0	0	0	0	0	0	0	0	0	0	0	0	0	0	0	0	0	0	0	0	0	0	0	0	0	0	0	0	0	0	0	0	0	0	0	0	0	0
350	1.7849e+06	64.53	53.44	75.62	5.66	0	0	0	0	0	0	0	0	0	0	0	0	0	0	0	0	0	0	0	0	0	0	0	0	0	0	0	0	0	0	0	0	0	0	0	0	0	0	0
351	1.79e+06	64.53	53.44	75.62	5.66	0	0	0	0	0	0	0	0	0	0	0	0	0	0	0	0	0	0	0	0	0	0	0	0	0	0	0	0	0	0	0	0	0	0	0	0	0	0	0
352	1.7951e+06	64.53	53.44	75.62	5.66	0	0	0	0	0	0	0	0	0	0	0	0	0	0	0	0	0	0	0	0	0	0	0	0	0	0	0	0	0	0	0	0	0	0	0	0	0	0	0
353	1.8002e+06	64.53	53.44	75.62	5.66	0	0	0	0	0	0	0	0	0	0	0	0	0	0	0	0	0	0	0	0	0	0	0	0	0	0	0	0	0	0	0	0	0	0	0	0	0	0	0
354	1.8053e+06	64.53	53.44	75.62	5.66	0	0	0	0	0	0	0	0	0	0	0	0	0	0	0	0	0	0	0	0	0	0	0	0	0	0	0	0	0	0	0	0	0	0	0	0	0	0	0
355	1.8104e+06	64.53	53.44	75.62	5.66	0	0	0	0	0	0	0	0	0	0	0	0	0	0	0	0	0	0	0	0	0	0	0	0	0	0	0	0	0	0	0	0	0	0	0	0	0	0	0
356	1.8155e+06	64.53	53.44	75.62	5.66	0	0	0	0	0	0	0	0	0	0	0	0	0	0	0	0	0	0	0	0	0	0	0	0	0	0	0	0	0	0	0	0	0	0	0	0	0	0	0
357	1820595	64.53	53.44	75.62	5.66	0	0	0	0	0	0	0	0	0	0	0	0	0	0	0	0	0	0	0	0	0	0	0	0	0	0	0	0	0	0	0	0	0	0	0	0	0	0	0
358	1.82569e+06	64.53	53.44	75.62	5.66	0	0	0	0	0	0	0	0	0	0	0	0	0	0	0	0	0	0	0	0	0	0	0	0	0	0	0	0	0	0	0	0	0	0	0	0	0	0	0
359	1.83079e+06	64.53	53.44	75.62	5.66	0	0	0	0	0	0	0	0	0	0	0	0	0	0	0	0	0	0	0	0	0	0	0	0	0	0	0	0	0	0	0	0	0	0	0	0	0	0	0
360	1.83589e+06	64.53	53.44	75.62	5.66	0	0	0	0	0	0	0	0	0	0	0	0	0	0	0	0	0	0	0	0	0	0	0	0	0	0	0	0	0	0	0	0	0	0	0	0	0	0	0
361	1.84099e+06	64.53	53.44	75.62	5.66	0	0	0	0	0	0	0	0	0	0	0	0	0	0	0	0	0	0	0	0	0	0	0	0	0	0	0	0	0	0	0	0	0	0	0	0	0	0	0
362	1.84609e+06	64.53	53.44	75.62	5.66	0	0	0	0	0	0	0	0	0	0	0	0	0	0	0	0	0	0	0	0	0	0	0	0	0	0	0	0	0	0	0	0	0	0	0	0	0	0	0
363	1.85119e+06	64.53	53.44	75.62	5.66	0	0	0	0	0	0	0	0	0	0	0	0	0	0	0	0	0	0	0	0	0	0	0	0	0	0	0	0	0	0	0	0	0	0	0	0	0	0	0
364	1.85629e+06	64.53	53.44	75.62	5.66	0	0	0	0	0	0	0	0	0	0	0	0	0	0	0	0	0	0	0	0	0	0	0	0	0	0	0	0	0	0	0	0	0	0	0	0	0	0	0
365	1.86139e+06	64.53	53.44	75.62	5.66	0	0	0	0	0	0	0	0	0	0	0	0	0	0	0	0	0	0	0	0	0	0	0	0	0	0	0	0	0	0	0	0	0	0	0	0	0	0	0
366	1.86649e+06	64.53	53.44	75.62	5.66	0	0	0	0	0	0	0	0	0	0	0	0	0	0	0	0	0	0	0	0	0	0	0	0	0	0	0	0	0	0	0	0	0	0	0	0	0	0	0
367	1.87159e+06	64.53	53.44	75.62	5.66	0	0	0	0	0	0	0	0	0	0	0	0	0	0	0	0	0	0	0	0	0	0	0	0	0	0	0	0	0	0	0	0	0	0	0	0	0	0	0
368	1.87669e+06	64.53	53.44	75.62	5.66	0	0	0	0	0	0	0	0	0	0	0	0	0	0	0	0	0	0	0	0	0	0	0	0	0	0	0	0	0	0	0	0	0	0	0	0	0	0	0
369	1.88179e+06	64.53	53.44	75.62	5.66	0	0	0	0	0	0	0	0	0	0	0	0	0	0	0	0	0	0	0	0	0	0	0	0	0	0	0	0	0	0	0	0	0	0	0	0	0	0	0
370	1.88689e+06	64.53	53.44	75.62	5.66	0	0	0	0	0	0	0	0	0	0	0	0	0	0	0	0	0	0	0	0	0	0	0	0	0	0	0	0	0	0	0	0	0	0	0	0	0	0	0
371	1.89199e+06	64.53	53.44	75.62	5.66	0	0	0	0	0	0	0	0	0	0	0	0	0	0	0	0	0	0	0	0	0	0	0	0	0	0	0	0	0	0	0	0	0	0	0	0	0	0	0
372	1.89709e+06	64.53	53.44	75.62	5.66	0	0	0	0	0	0	0	0	0	0	0	0	0	0	0	0	0	0	0	0	0	0	0	0	0	0	0	0	0	0	0	0	0	0	0	0	0	0	0
373	1.90219e+06	64.53	53.44	75.62	5.66	0	0	0	0	0	0	0	0	0	0	0	0	0	0	0	0	0	0	0	0	0	0	0	0	0	0	0	0	0	0	0	0	0	0	0	0	0	0	0
374	1907290	64.53	53.44	75.62	5.66	0	0	0	0	0	0	0	0	0	0	0	0	0	0	0	0	0	0	0	0	0	0	0	0	0	0	0	0	0	0	0	0	0	0	0	0	0	0	0
375	1.91239e+06	64.53	53.44	75.62	5.66	0	0	0	0	0	0	0	0	0	0	0	0	0	0	0	0	0	0	0	0	0	0	0	0	0	0	0	0	0	0	0	0	0	0	0	0	0	0	0
376	1.91749e+06	64.53	53.44	75.62	5.66	0	0	0	0	0	0	0	0	0	0	0	0	0	0	0	0	0	0	0	0	0	0	0	0	0	0	0	0	0	0	0	0	0	0	0	0	0	0	0
377	1.92259e+06	64.53	53.44	75.62	5.66	0	0	0	0	0	0	0	0	0	0	0	0	0	0	0	0	0	0	0	0	0	0	0	0	0	0	0	0	0	0	0	0	0	0	0	0	0	0	0
378	1.92769e+06	64.53	53.44	75.62	5.66	0	0	0	0	0	0	0	0	0	0	0	0	0	0	0	0	0	0	0	0	0	0	0	0	0	0	0	0	0	0	0	0	0	0	0	0	0	0	0
379	1.93279e+06	64.53	53.44	75.62	5.66	0	0	0	0	0	0	0	0	0	0	0	0	0	0	0	0	0	0	0	0	0	0	0	0	0	0	0	0	0	0	0	0	0	0	0	0	0	0	0
380	1.93789e+06	64.53	53.44	75.62	5.66	0	0	0	0	0	0	0	0	0	0	0	0	0	0	0	0	0	0	0	0	0	0	0	0	0	0	0	0	0	0	0	0	0	0	0	0	0	0	0
381	1.94299e+06	64.53	53.44	75.62	5.66	0	0	0	0	0	0	0	0	0	0	0	0	0	0	0	0	0	0	0	0	0	0	0	0	0	0	0	0	0	0	0	0	0	0	0	0	0	0	0
382	1.94809e+06	64.53	53.44	75.62	5.66	0	0	0	0	0	0	0	0	0	0	0	0	0	0	0	0	0	0	0	0	0	0	0	0	0	0	0	0	0	0	0	0	0	0	0	0	0	0	0
383	1.95319e+06	64.53	53.44	75.62	5.66	0	0	0	0	0	0	0	0	0	0	0	0	0	0	0	0	0	0	0	0	0	0	0	0	0	0	0	0	0	0	0	0	0	0	0	0	0	0	0
384	1.95829e+06	64.53	53.44	75.62	5.66	0	0	0	0	0	0	0	0	0	0	0	0	0	0	0	0	0	0	0	0	0	0	0	0	0	0	0	0	0	0	0	0	0	0	0	0	0	0	0
385	1.96339e+06	64.53	53.44	75.62	5.66	0	0	0	0	0	0	0	0	0	0	0	0	0	0	0	0	0	0	0	0	0	0	0	0	0	0	0	0	0	0	0	0	0	0	0	0	0	0	0
386	1.96849e+06	64.53	53.44	75.62	5.66	0	0	0	0	0	0	0	0	0	0	0	0	0	0	0	0	0	0	0	0	0	0	0	0	0	0	0	0	0	0	0	0	0	0	0	0	0	0	0
387	1.97359e+06	64.53	53.44	75.62	5.66	0	0	0	0	0	0	0	0	0	0	0	0	0	0	0	0	0	0	0	0	0	0	0	0	0	0	0	0	0	0	0	0	0	0	0	0	0	0	0
388	1.97869e+06	64.53	53.44	75.62	5.66	0	0	0	0	0	0	0	0	0	0	0	0	0	0	0	0	0	0	0	0	0	0	0	0	0	0	0	0	0	0	0	0	0	0	0	0	0	0	0
389	1.98379e+06	64.53	53.44	75.62	5.66	0	0	0	0	0	0	0	0	0	0	0	0	0	0	0	0	0	0	0	0	0	0	0	0	0	0	0	0	0	0	0	0	0	0	0	0	0	0	0
390	1.98889e+06	64.53	53.44	75.62	5.66	0	0	0	0	0	0	0	0	0	0	0	0	0	0	0	0	0	0	0	0	0	0	0	0	0	0	0	0	0	0	0	0	0	0	0	0	0	0	0
391	1993985	64.53	53.44	75.62	5.66	0	0	0	0	0	0	0	0	0	0	0	0	0	0	0	0	0	0	0	0	0	0	0	0	0	0	0	0	0	0	0	0	0	0	0	0	0	0	0
392	1.99908e+06	64.53	53.44	75.62	5.66	0	0	0	0	0	0	0	0	0	0	0	0	0	0	0	0	0	0	0	0	0	0	0	0	0	0	0	0	0	0	0	0	0	0	0	0	0	0	0
393	2.00418e+06	64.53	53.44	75.62	5.66	0	0	0	0	0	0	0	0	0	0	0	0	0	0	0	0	0	0	0	0	0	0	0	0	0	0	0	0	0	0	0	0	0	0	0	0	0	0	0
394	2.00928e+06	64.53	53.44	75.62	5.66	0	0	0	0	0	0	0	0	0	0	0	0	0	0	0	0	0	0	0	0	0	0	0	0	0	0	0	0	0	0	0	0	0	0	0	0	0	0	0
395	2.01438e+06	64.53	53.44	75.62	5.66	0	0	0	0	0	0	0	0	0	0	0	0	0	0	0	0	0	0	0	0	0	0	0	0	0	0	0	0	0	0	0	0	0	0	0	0	0	0	0
396	2.01948e+06	64.53	53.44	75.62	5.66	0	0	0	0	0	0	0	0	0	0	0	0	0	0	0	0	0	0	0	0	0	0	0	0	0	0	0	0	0	0	0	0	0	0	0	0	0	0	0
397	2.02458e+06	64.53	53.44	75.62	5.66	0	0	0	0	0	0	0	0	0	0	0	0	0	0	0	0	0	0	0	0	0	0	0	0	0	0	0	0	0	0	0	0	0	0	0	0	0	0	0
398	2.02968e+06	64.53	53.44	75.62	5.66	0	0	0	0	0	0	0	0	0	0	0	0	0	0	0	0	0	0	0	0	0	0	0	0	0	0	0	0	0	0	0	0	0	0	0	0	0	0	0
399	2.03478e+06	64.53	53.44	75.62	5.66	0	0	0	0	0	0	0	0	0	0	0	0	0	0	0	0	0	0	0	0	0	0	0	0	0	0	0	0	0	0	0	0	0	0	0	0	0	0	0
400	2.03988e+06	64.53	53.44	75.62	5.66	0	0	0	0	0	0	0	0	0	0	0	0	0	0	0	0	0	0	0	0	0	0	0	0	0	0	0	0	0	0	0	0	0	0	0	0	0	0	0
401	2.04498e+06	64.53	53.44	75.62	5.66	0	0	0	0	0	0	0	0	0	0	0	0	0	0	0	0	0	0	0	0	0	0	0	0	0	0	0	0	0	0	0	0	0	0	0	0	0	0	0
402	2.05008e+06	64.53	53.44	75.62	5.66	0	0	0	0	0	0	0	0	0	0	0	0	0	0	0	0	0	0	0	0	0	0	0	0	0	0	0	0	0	0	0	0	0	0	0	0	0	0	0
403	2.05518e+06	64.53	53.44	75.62	5.66	0	0	0	0	0	0	0	0	0	0	0	0	0	0	0	0	0	0	0	0	0	0	0	0	0	0	0	0	0	0	0	0	0	0	0	0	0	0	0
404	2.06028e+06	64.53	53.44	75.62	5.66	0	0	0	0	0	0	0	0	0	0	0	0	0	0	0	0	0	0	0	0	0	0	0	0	0	0	0	0	0	0	0	0	0	0	0	0	0	0	0
405	2.06538e+06	64.53	53.44	75.62	5.66	0	0	0	0	0	0	0	0	0	0	0	0	0	0	0	0	0	0	0	0	0	0	0	0	0	0	0	0	0	0	0	0	0	0	0	0	0	0	0
406	2.07048e+06	64.53	53.44	75.62	5.66	0	0	0	0	0	0	0	0	0	0	0	0	0	0	0	0	0	0	0	0	0	0	0	0	0	0	0	0	0	0	0	0	0	0	0	0	0	0	0
407	2.07558e+06	64.53	53.44	75.62	5.66	0	0	0	0	0	0	0	0	0	0	0	0	0	0	0	0	0	0	0	0	0	0	0	0	0	0	0	0	0	0	0	0	0	0	0	0	0	0	0
408	2080680	64.53	53.44	75.62	5.66	0	0	0	0	0	0	0	0	0	0	0	0	0	0	0	0	0	0	0	0	0	0	0	0	0	0	0	0	0	0	0	0	0	0	0	0	0	0	0
409	2.08578e+06	64.53	53.44	75.62	5.66	0	0	0	0	0	0	0	0	0	0	0	0	0	0	0	0	0	0	0	0	0	0	0	0	0	0	0	0	0	0	0	0	0	0	0	0	0	0	0
410	2.09088e+06	64.53	53.44	75.62	5.66	0	0	0	0	0	0	0	0	0	0	0	0	0	0	0	0	0	0	0	0	0	0	0	0	0	0	0	0	0	0	0	0	0	0	0	0	0	0	0
411	2.09598e+06	64.53	53.44	75.62	5.66	0	0	0	0	0	0	0	0	0	0	0	0	0	0	0	0	0	0	0	0	0	0	0	0	0	0	0	0	0	0	0	0	0	0	0	0	0	0	0
412	2.10108e+06	64.53	53.44	75.62	5.66	0	0	0	0	0	0	0	0	0	0	0	0	0	0	0	0	0	0	0	0	0	0	0	0	0	0	0	0	0	0	0	0	0	0	0	0	0	0	0
413	2.10618e+06	64.53	53.44	75.62	5.66	0	0	0	0	0	0	0	0	0	0	0	0	0	0	0	0	0	0	0	0	0	0	0	0	0	0	0	0	0	0	0	0	0	0	0	0	0	0	0
414	2.11128e+06	64.53	53.44	75.62	5.66	0	0	0	0	0	0	0	0	0	0	0	0	0	0	0	0	0	0	0	0	0	0	0	0	0	0	0	0	0	0	0	0	0	0	0	0	0	0	0
415	2.11638e+06	64.53	53.44	75.62	5.66	0	0	0	0	0	0	0	0	0	0	0	0	0	0	0	0	0	0	0	0	0	0	0	0	0	0	0	0	0	0	0	0	0	0	0	0	0	0	0
416	2.12148e+06	64.53	53.44	75.62	5.66	0	0	0	0	0	0	0	0	0	0	0	0	0	0	0	0	0	0	0	0	0	0	0	0	0	0	0	0	0	0	0	0	0	0	0	0	0	0	0
417	2.12658e+06	64.53	53.44	75.62	5.66	0	0	0	0	0	0	0	0	0	0	0	0	0	0	0	0	0	0	0	0	0	0	0	0	0	0	0	0	0	0	0	0	0	0	0	0	0	0	0
418	2.13168e+06	64.53	53.44	75.62	5.66	0	0	0	0	0	0	0	0	0	0	0	0	0	0	0	0	0	0	0	0	0	0	0	0	0	0	0	0	0	0	0	0	0	0	0	0	0	0	0
419	2.13678e+06	64.53	53.44	75.62	5.66	0	0	0	0	0	0	0	0	0	0	0	0	0	0	0	0	0	0	0	0	0	0	0	0	0	0	0	0	0	0	0	0	0	0	0	0	0	0	0
420	2.14188e+06	64.53	53.44	75.62	5.66	0	0	0	0	0	0	0	0	0	0	0	0	0	0	0	0	0	0	0	0	0	0	0	0	0	0	0	0	0	0	0	0	0	0	0	0	0	0	0
421	2.14698e+06	64.53	53.44	75.62	5.66	0	0	0	0	0	0	0	0	0	0	0	0	0	0	0	0	0	0	0	0	0	0	0	0	0	0	0	0	0	0	0	0	0	0	0	0	0	0	0
422	2.15208e+06	64.53	53.44	75.62	5.66	0	0	0	0	0	0	0	0	0	0	0	0	0	0	0	0	0	0	0	0	0	0	0	0	0	0	0	0	0	0	0	0	0	0	0	0	0	0	0
423	2.15718e+06	64.53	53.44	75.62	5.66	0	0	0	0	0	0	0	0	0	0	0	0	0	0	0	0	0	0	0	0	0	0	0	0	0	0	0	0	0	0	0	0	0	0	0	0	0	0	0
424	2.16228e+06	64.53	53.44	75.62	5.66	0	0	0	0	0	0	0	0	0	0	0	0	0	0	0	0	0	0	0	0	0	0	0	0	0	0	0	0	0	0	0	0	0	0	0	0	0	0	0
425	2167375	64.53	53.44	75.62	5.66	0	0	0	0	0	0	0	0	0	0	0	0	0	0	0	0	0	0	0	0	0	0	0	0	0	0	0	0	0	0	0	0	0	0	0	0	0	0	0
426	2.17247e+06	64.53	53.44	75.62	5.66	0	0	0	0	0	0	0	0	0	0	0	0	0	0	0	0	0	0	0	0	0	0	0	0	0	0	0	0	0	0	0	0	0	0	0	0	0	0	0
427	2.17757e+06	64.53	53.44	75.62	5.66	0	0	0	0	0	0	0	0	0	0	0	0	0	0	0	0	0	0	0	0	0	0	0	0	0	0	0	0	0	0	0	0	0	0	0	0	0	0	0
428	2.18267e+06	64.53	53.44	75.62	5.66	0	0	0	0	0	0	0	0	0	0	0	0	0	0	0	0	0	0	0	0	0	0	0	0	0	0	0	0	0	0	0	0	0	0	0	0	0	0	0
429	2.18777e+06	64.53	53.44	75.62	5.66	0	0	0	0	0	0	0	0	0	0	0	0	0	0	0	0	0	0	0	0	0	0	0	0	0	0	0	0	0	0	0	0	0	0	0	0	0	0	0
430	2.19287e+06	64.53	53.44	75.62	5.66	0	0	0	0	0	0	0	0	0	0	0	0	0	0	0	0	0	0	0	0	0	0	0	0	0	0	0	0	0	0	0	0	0	0	0	0	0	0	0
431	2.19797e+06	64.53	53.44	75.62	5.66	0	0	0	0	0	0	0	0	0	0	0	0	0	0	0	0	0	0	0	0	0	0	0	0	0	0	0	0	0	0	0	0	0	0	0	0	0	0	0
432	2.20307e+06	64.53	53.44	75.62	5.66	0	0	0	0	0	0	0	0	0	0	0	0	0	0	0	0	0	0	0	0	0	0	0	0	0	0	0	0	0	0	0	0	0	0	0	0	0	0	0
433	2.20817e+06	64.53	53.44	75.62	5.66	0	0	0	0	0	0	0	0	0	0	0	0	0	0	0	0	0	0	0	0	0	0	0	0	0	0	0	0	0	0	0	0	0	0	0	0	0	0	0
434	2.21327e+06	64.53	53.44	75.62	5.66	0	0	0	0	0	0	0	0	0	0	0	0	0	0	0	0	0	0	0	0	0	0	0	0	0	0	0	0	0	0	0	0	0	0	0	0	0	0	0
435	2.21837e+06	64.53	53.44	75.62	5.66	0	0	0	0	0	0	0	0	0	0	0	0	0	0	0	0	0	0	0	0	0	0	0	0	0	0	0	0	0	0	0	0	0	0	0	0	0	0	0
436	2.22347e+06	64.53	53.44	75.62	5.66	0	0	0	0	0	0	0	0	0	0	0	0	0	0	0	0	0	0	0	0	0	0	0	0	0	0	0	0	0	0	0	0	0	0	0	0	0	0	0
437	2.22857e+06	64.53	53.44	75.62	5.66	0	0	0	0	0	0	0	0	0	0	0	0	0	0	0	0	0	0	0	0	0	0	0	0	0	0	0	0	0	0	0	0	0	0	0	0	0	0	0
438	2.23367e+06	64.53	53.44	75.62	5.66	0	0	0	0	0	0	0	0	0	0	0	0	0	0	0	0	0	0	0	0	0	0	0	0	0	0	0	0	0	0	0	0	0	0	0	0	0	0	0
439	2.23877e+06	64.53	53.44	75.62	5.66	0	0	0	0	0	0	0	0	0	0	0	0	0	0	0	0	0	0	0	0	0	0	0	0	0	0	0	0	0	0	0	0	0	0	0	0	0	0	0
440	2.24387e+06	64.53	53.44	75.62	5.66	0	0	0	0	0	0	0	0	0	0	0	0	0	0	0	0	0	0	0	0	0	0	0	0	0	0	0	0	0	0	0	0	0	0	0	0	0	0	0
441	2.24897e+06	64.53	53.44	75.62	5.66	0	0	0	0	0	0	0	0	0	0	0	0	0	0	0	0	0	0	0	0	0	0	0	0	0	0	0	0	0	0	0	0	0	0	0	0	0	0	0
442	2254070	64.53	53.44	75.62	5.66	0	0	0	0	0	0	0	0	0	0	0	0	0	0	0	0	0	0	0	0	0	0	0	0	0	0	0	0	0	0	0	0	0	0	0	0	0	0	0
443	2.25917e+06	64.53	53.44	75.62	5.66	0	0	0	0	0	0	0	0	0	0	0	0	0	0	0	0	0	0	0	0	0	0	0	0	0	0	0	0	0	0	0	0	0	0	0	0	0	0	0
444	2.26427e+06	64.53	53.44	75.62	5.66	0	0	0	0	0	0	0	0	0	0	0	0	0	0	0	0	0	0	0	0	0	0	0	0	0	0	0	0	0	0	0	0	0	0	0	0	0	0	0
445	2.26937e+06	64.53	53.44	75.62	5.66	0	0	0	0	0	0	0	0	0	0	0	0	0	0	0	0	0	0	0	0	0	0	0	0	0	0	0	0	0	0	0	0	0	0	0	0	0	0	0
446	2.27447e+06	64.53	53.44	75.62	5.66	0	0	0	0	0	0	0	0	0	0	0	0	0	0	0	0	0	0	0	0	0	0	0	0	0	0	0	0	0	0	0	0	0	0	0	0	0	0	0
447	2.27957e+06	64.53	53.44	75.62	5.66	0	0	0	0	0	0	0	0	0	0	0	0	0	0	0	0	0	0	0	0	0	0	0	0	0	0	0	0	0	0	0	0	0	0	0	0	0	0	0
448	2.28467e+06	64.53	53.44	75.62	5.66	0	0	0	0	0	0	0	0	0	0	0	0	0	0	0	0	0	0	0	0	0	0	0	0	0	0	0	0	0	0	0	0	0	0	0	0	0	0	0
449	2.28977e+06	64.53	53.44	75.62	5.66	0	0	0	0	0	0	0	0	0	0	0	0	0	0	0	0	0	0	0	0	0	0	0	0	0	0	0	0	0	0	0	0	0	0	0	0	0	0	0
450	2.29487e+06	64.53	53.44	75.62	5.66	0	0	0	0	0	0	0	0	0	0	0	0	0	0	0	0	0	0	0	0	0	0	0	0	0	0	0	0	0	0	0	0	0	0	0	0	0	0	0
451	2.29997e+06	64.53	53.44	75.62	5.66	0	0	0	0	0	0	0	0	0	0	0	0	0	0	0	0	0	0	0	0	0	0	0	0	0	0	0	0	0	0	0	0	0	0	0	0	0	0	0
452	2.30507e+06	64.53	53.44	75.62	5.66	0	0	0	0	0	0	0	0	0	0	0	0	0	0	0	0	0	0	0	0	0	0	0	0	0	0	0	0	0	0	0	0	0	0	0	0	0	0	0
453	2.31017e+06	64.53	53.44	75.62	5.66	0	0	0	0	0	0	0	0	0	0	0	0	0	0	0	0	0	0	0	0	0	0	0	0	0	0	0	0	0	0	0	0	0	0	0	0	0	0	0
454	2.31527e+06	64.53	53.44	75.62	5.66	0	0	0	0	0	0	0	0	0	0	0	0	0	0	0	0	0	0	0	0	0	0	0	0	0	0	0	0	0	0	0	0	0	0	0	0	0	0	0
455	2.32037e+06	64.53	53.44	75.62	5.66	0	0	0	0	0	0	0	0	0	0	0	0	0	0	0	0	0	0	0	0	0	0	0	0	0	0	0	0	0	0	0	0	0	0	0	0	0	0	0
456	2.32547e+06	64.53	53.44	75.62	5.66	0	0	0	0	0	0	0	0	0	0	0	0	0	0	0	0	0	0	0	0	0	0	0	0	0	0	0	0	0	0	0	0	0	0	0	0	0	0	0
457	2.33057e+06	64.53	53.44	75.62	5.66	0	0	0	0	0	0	0	0	0	0	0	0	0	0	0	0	0	0	0	0	0	0	0	0	0	0	0	0	0	0	0	0	0	0	0	0	0	0	0
458	2.33567e+06	64.53	53.44	75.62	5.66	0	0	0	0	0	0	0	0	0	0	0	0	0	0	0	0	0	0	0	0	0	0	0	0	0	0	0	0	0	0	0	0	0	0	0	0	0	0	0
459	2340765	64.53	53.44	75.62	5.66	0	0	0	0	0	0	0	0	0	0	0	0	0	0	0	0	0	0	0	0	0	0	0	0	0	0	0	0	0	0	0	0	0	0	0	0	0	0	0
460	2.34586e+06	64.53	53.44	75.62	5.66	0	0	0	0	0	0	0	0	0	0	0	0	0	0	0	0	0	0	0	0	0	0	0	0	0	0	0	0	0	0	0	0	0	0	0	0	0	0	0
461	2.35096e+06	64.53	53.44	75.62	5.66	0	0	0	0	0	0	0	0	0	0	0	0	0	0	0	0	0	0	0	0	0	0	0	0	0	0	0	0	0	0	0	0	0	0	0	0	0	0	0
462	2.35606e+06	64.53	53.44	75.62	5.66	0	0	0	0	0	0	0	0	0	0	0	0	0	0	0	0	0	0	0	0	0	0	0	0	0	0	0	0	0	0	0	0	0	0	0	0	0	0	0
463	2.36116e+06	64.53	53.44	75.62	5.66	0	0	0	0	0	0	0	0	0	0	0	0	0	0	0	0	0	0	0	0	0	0	0	0	0	0	0	0	0	0	0	0	0	0	0	0	0	0	0
464	2.36626e+06	64.53	53.44	75.62	5.66	0	0	0	0	0	0	0	0	0	0	0	0	0	0	0	0	0	0	0	0	0	0	0	0	0	0	0	0	0	0	0	0	0	0	0	0	0	0	0
465	2.37136e+06	64.53	53.44	75.62	5.66	0	0	0	0	0	0	0	0	0	0	0	0	0	0	0	0	0	0	0	0	0	0	0	0	0	0	0	0	0	0	0	0	0	0	0	0	0	0	0
466	2.37646e+06	64.53	53.44	75.62	5.66	0	0	0	0	0	0	0	0	0	0	0	0	0	0	0	0	0	0	0	0	0	0	0	0	0	0	0	0	0	0	0	0	0	0	0	0	0	0	0
467	2.38156e+06	64.53	53.44	75.62	5.66	0	0	0	0	0	0	0	0	0	0	0	0	0	0	0	0	0	0	0	0	0	0	0	0	0	0	0	0	0	0	0	0	0	0	0	0	0	0	0
468	2.38666e+06	64.53	53.44	75.62	5.66	0	0	0	0	0	0	0	0	0	0	0	0	0	0	0	0	0	0	0	0	0	0	0	0	0	0	0	0	0	0	0	0	0	0	0	0	0	0	0
469	2.39176e+06	64.53	53.44	75.62	5.66	0	0	0	0	0	0	0	0	0	0	0	0	0	0	0	0	0	0	0	0	0	0	0	0	0	0	0	0	0	0	0	0	0	0	0	0	0	0	0
470	2.39686e+06	64.53	53.44	75.62	5.66	0	0	0	0	0	0	0	0	0	0	0	0	0	0	0	0	0	0	0	0	0	0	0	0	0	0	0	0	0	0	0	0	0	0	0	0	0	0	0
471	2.40196e+06	64.53	53.44	75.62	5.66	0	0	0	0	0	0	0	0	0	0	0	0	0	0	0	0	0	0	0	0	0	0	0	0	0	0	0	0	0	0	0	0	0	0	0	0	0	0	0
472	2.40706e+06	64.53	53.44	75.62	5.66	0	0	0	0	0	0	0	0	0	0	0	0	0	0	0	0	0	0	0	0	0	0	0	0	0	0	0	0	0	0	0	0	0	0	0	0	0	0	0
473	2.41216e+06	64.53	53.44	75.62	5.66	0	0	0	0	0	0	0	0	0	0	0	0	0	0	0	0	0	0	0	0	0	0	0	0	0	0	0	0	0	0	0	0	0	0	0	0	0	0	0
474	2.41726e+06	64.53	53.44	75.62	5.66	0	0	0	0	0	0	0	0	0	0	0	0	0	0	0	0	0	0	0	0	0	0	0	0	0	0	0	0	0	0	0	0	0	0	0	0	0	0	0
475	2.42236e+06	64.53	53.44	75.62	5.66	0	0	0	0	0	0	0	0	0	0	0	0	0	0	0	0	0	0	0	0	0	0	0	0	0	0	0	0	0	0	0	0	0	0	0	0	0	0	0
476	2427460	64.53	53.44	75.62	5.66	0	0	0	0	0	0	0	0	0	0	0	0	0	0	0	0	0	0	0	0	0	0	0	0	0	0	0	0	0	0	0	0	0	0	0	0	0	0	0
477	2.43256e+06	64.53	53.44	75.62	5.66	0	0	0	0	0	0	0	0	0	0	0	0	0	0	0	0	0	0	0	0	0	0	0	0	0	0	0	0	0	0	0	0	0	0	0	0	0	0	0
478	2.43766e+06	64.53	53.44	75.62	5.66	0	0	0	0	0	0	0	0	0	0	0	0	0	0	0	0	0	0	0	0	0	0	0	0	0	0	0	0	0	0	0	0	0	0	0	0	0	0	0
479	2.44276e+06	64.53	53.44	75.62	5.66	0	0	0	0	0	0	0	0	0	0	0	0	0	0	0	0	0	0	0	0	0	0	0	0	0	0	0	0	0	0	0	0	0	0	0	0	0	0	0
480	2.44786e+06	64.53	53.44	75.62	5.66	0	0	0	0	0	0	0	0	0	0	0	0	0	0	0	0	0	0	0	0	0	0	0	0	0	0	0	0	0	0	0	0	0	0	0	0	0	0	0
481	2.45296e+06	64.53	53.44	75.62	5.66	0	0	0	0	0	0	0	0	0	0	0	0	0	0	0	0	0	0	0	0	0	0	0	0	0	0	0	0	0	0	0	0	0	0	0	0	0	0	0
482	2.45806e+06	64.53	53.44	75.62	5.66	0	0	0	0	0	0	0	0	0	0	0	0	0	0	0	0	0	0	0	0	0	0	0	0	0	0	0	0	0	0	0	0	0	0	0	0	0	0	0
[truncated: 18 more rows]

## Sheet: Rotifera polimictic
EstimateS (Version 9.1.0), Copyright R. K. Colwell: http://purl.oclc.org/estimates
[truncated: 503 more rows]

[truncated: 17 more sheets: Cladocera polimictic, Copepoda polimictic, Rotifera dimictic, Cladocera dimictic, Copepoda dimictic, Rotifera mezotrophy, Cladocera mezotrophy, Copepoda mezotrophy, Rotifera mezo-eutrophy, Cladocera mezo-eutrophy, Copepoda mezo-eutrophy, Rotifera eutrophy, Cladocera eutrophy, Copepoda eutrophy, Rotifera polytrophy, Cladocera polytrophy, Copepoda polytrophy]
